# Supplementary material
Source: PubMed Central journal article supplement (PMC2768572)

**Figure S6.** Detailed analysis of piRNAs immunoprecipitated from *ago3*/TM6B and *ago3<sup>t2</sup>/ago3<sup>t3</sup>* ovaries. The figure presents the 95 transposon families for which we tallied > 500 piRNA reads in *ago3*/TM6B, plus the tandem repeat *mst40*.

(A, B) The abundance (per million) of piRNAs uniquely associated with Ago3, Aub, or Piwi in *ago3*/TM6B (A) and to Aub or Piwi protein for *ago3<sup>t2</sup>/ago3<sup>t3</sup>* ovaries (B) for each base-pair position of the transposon consensus sequence. Abundance was both normalized by the number of times a piRNA mapped to the genome and calibrated to the aggregate abundance of the same sequences in the corresponding total small RNA sample (see Supplemental Experimental Procedures). For each base, the total normalized abundance of piRNAs that fall on that position is reported. Here and below, blue denotes sense strand mapping piRNAs; red, antisense-strand mapping piRNAs.

(C, D) Distribution of the length of 5' overlaps between sense and antisense piRNAs mapped to the transposon family and uniquely bound to Ago3, Aub, or Piwi protein for *ago3*/TM6B (C) and uniquely bound to Aub or Piwi protein for *ago3<sup>t2</sup>/ago3<sup>t3</sup>* (D) ovaries. Only pairs that overlapped at their 5' ends were included. For each length of overlap, the percentage of the sense piRNA reads that have partners is plotted in blue at the top. Likewise, the percentage of antisense piRNA reads that have partners is plotted in red on the bottom. All reads were normalized by number of times mapped to the genome. A peak at 10 bp indicates ping-pong pairing.

# 17.6

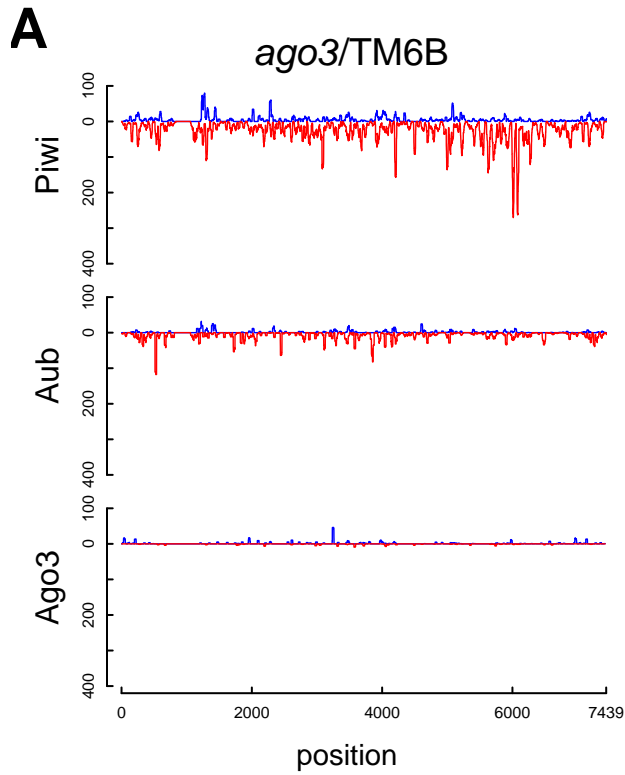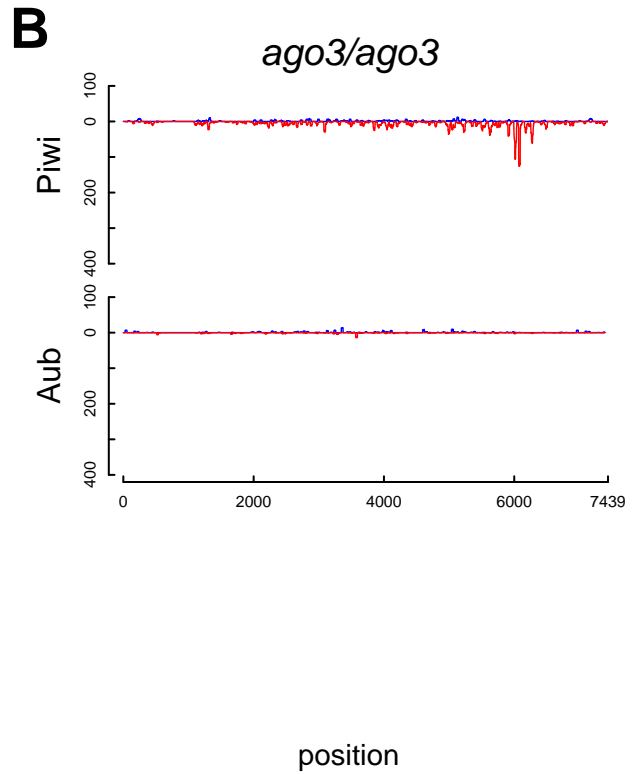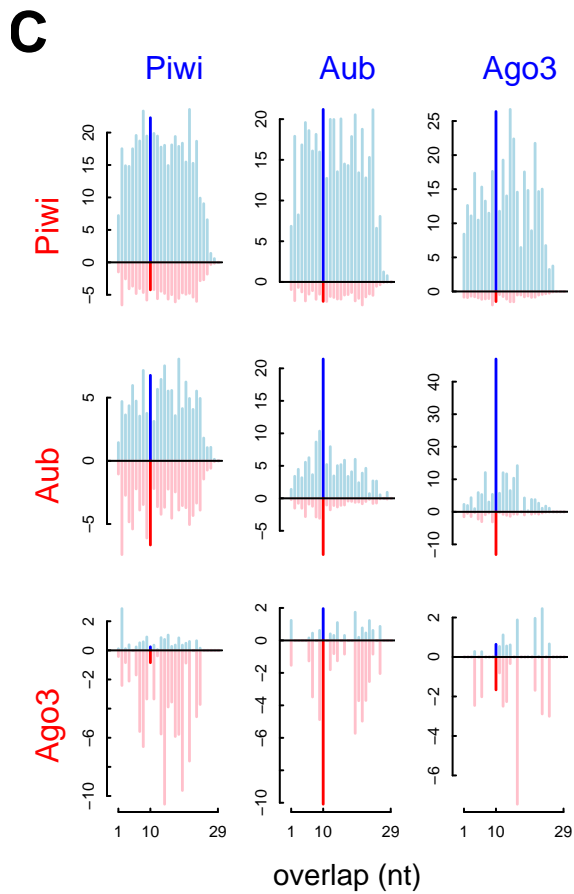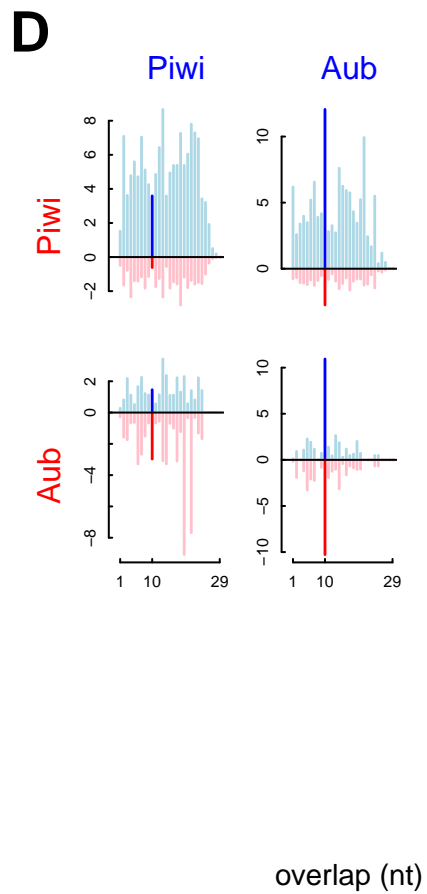

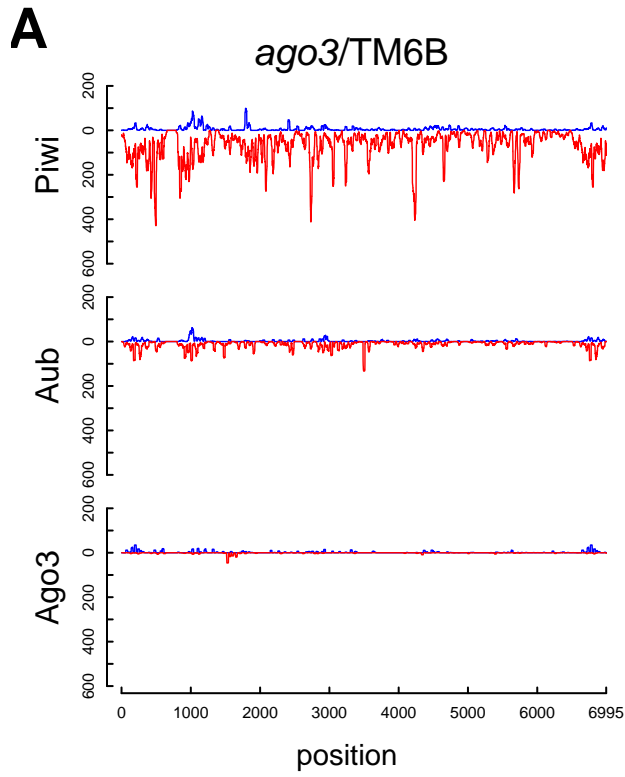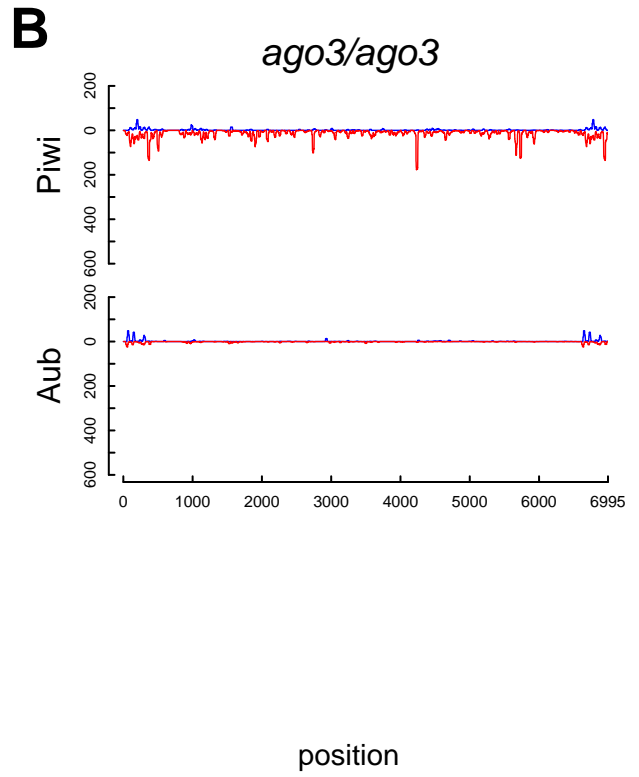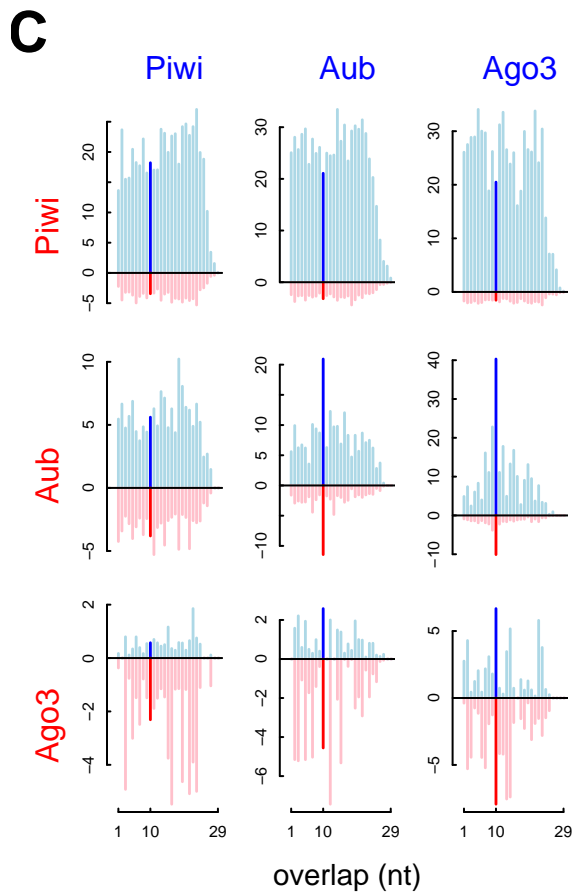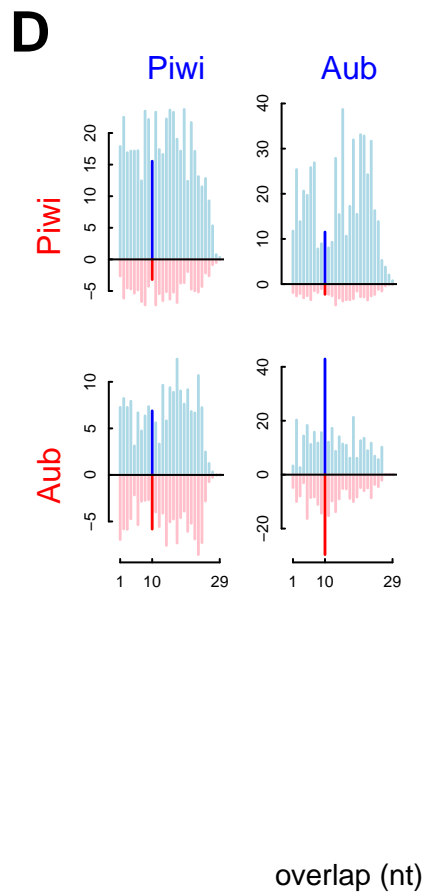

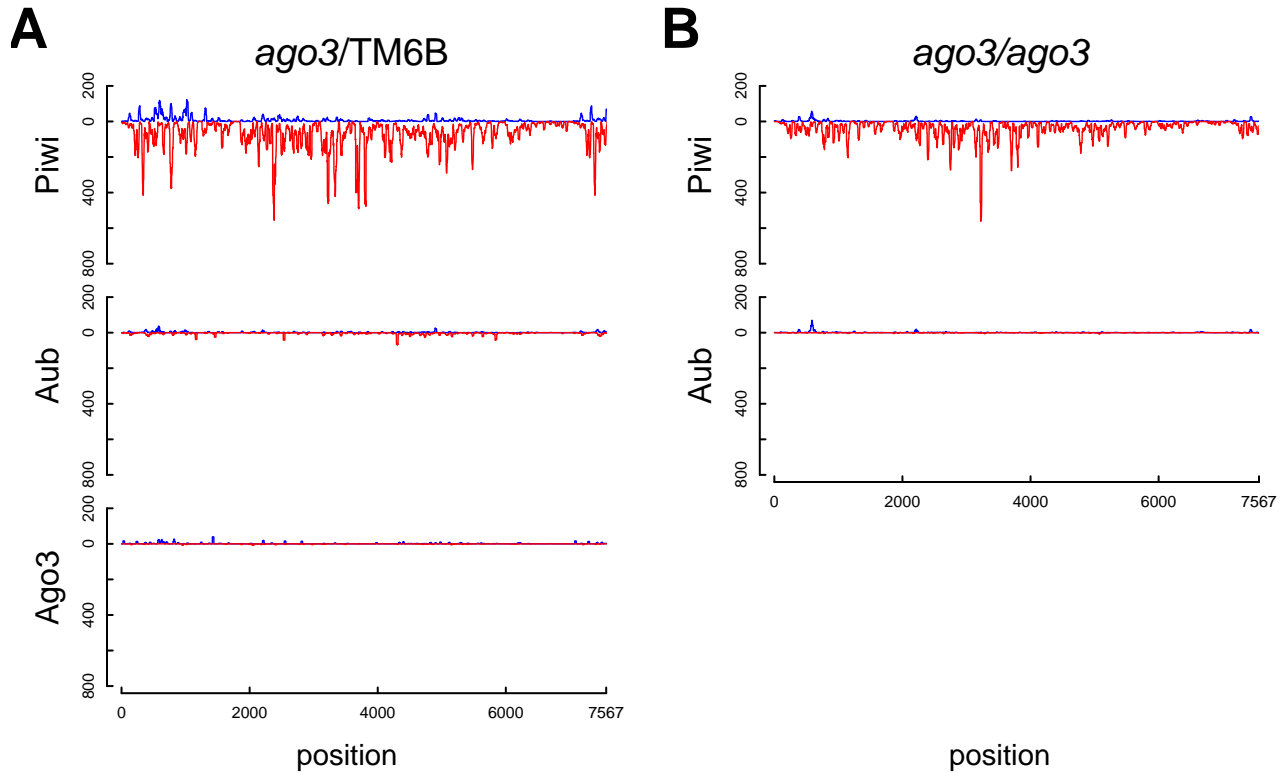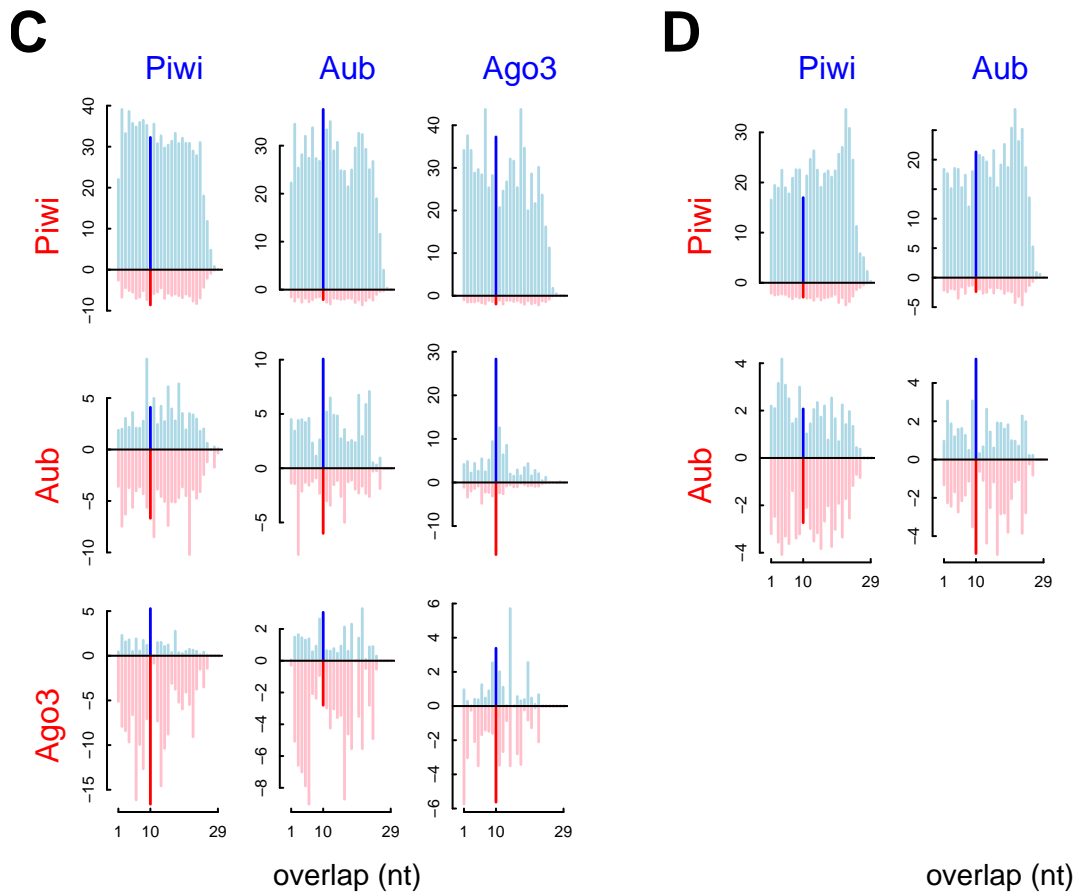



# 1360

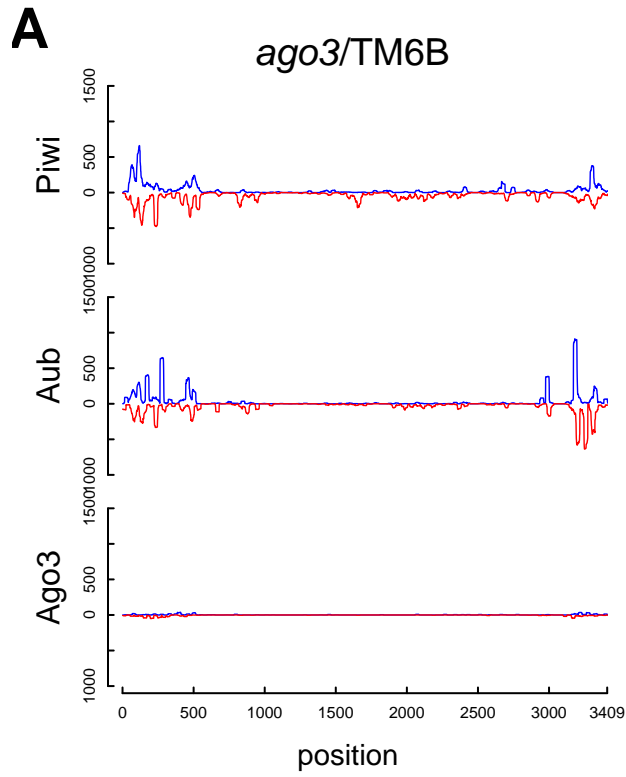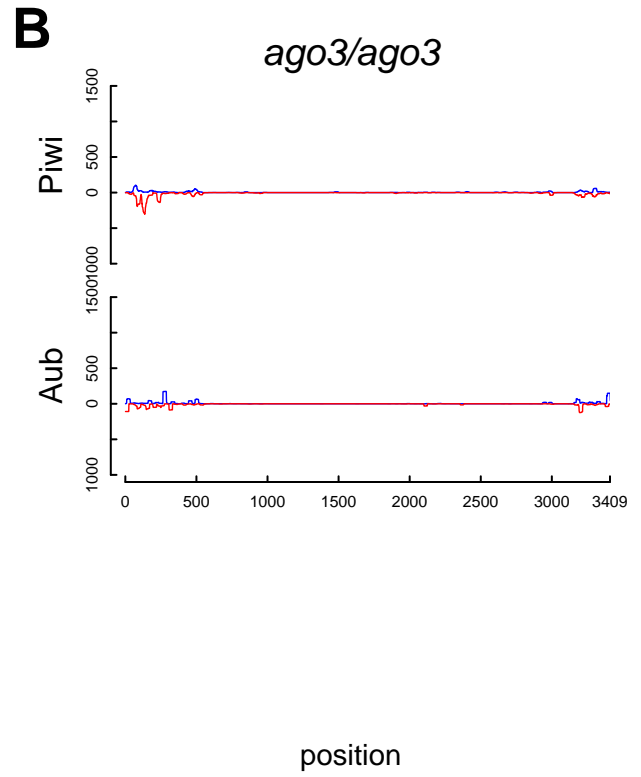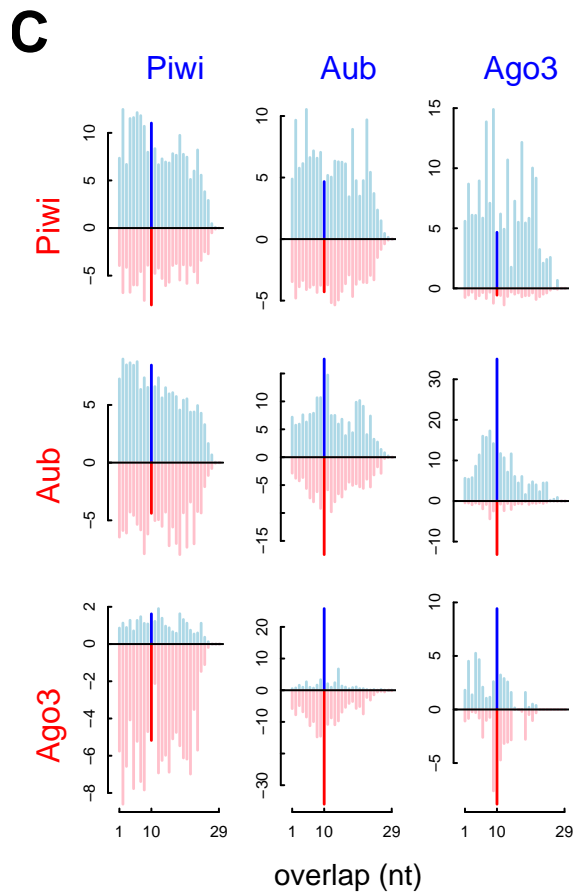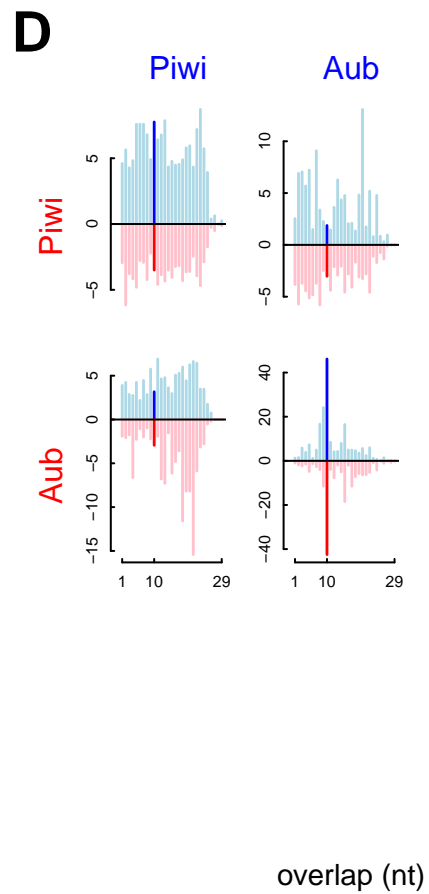

# 1731

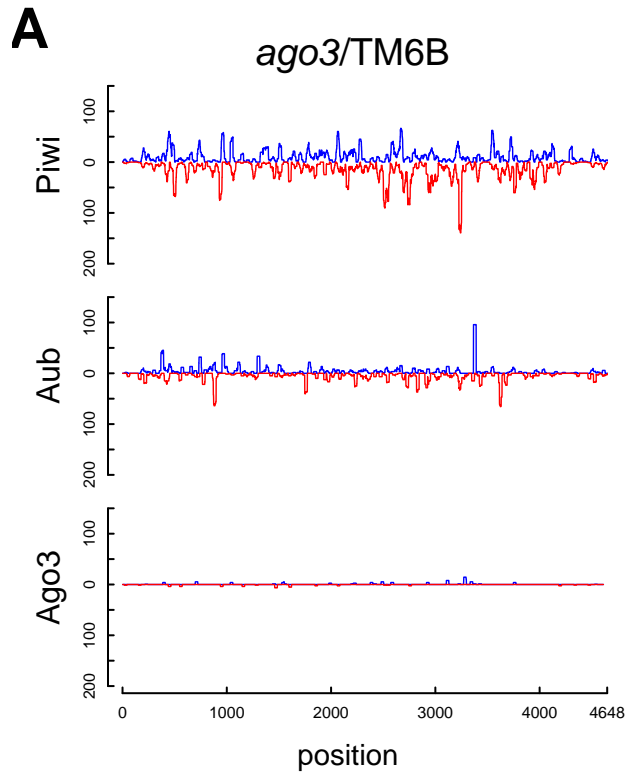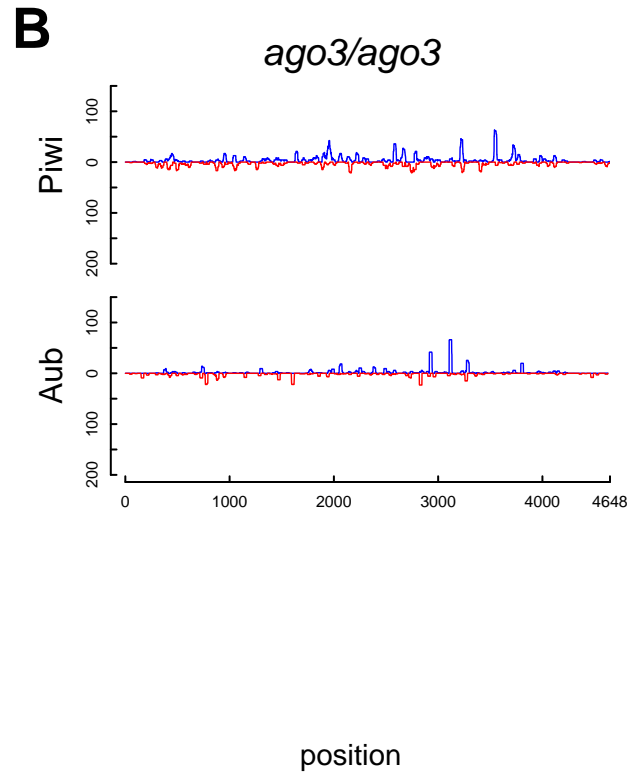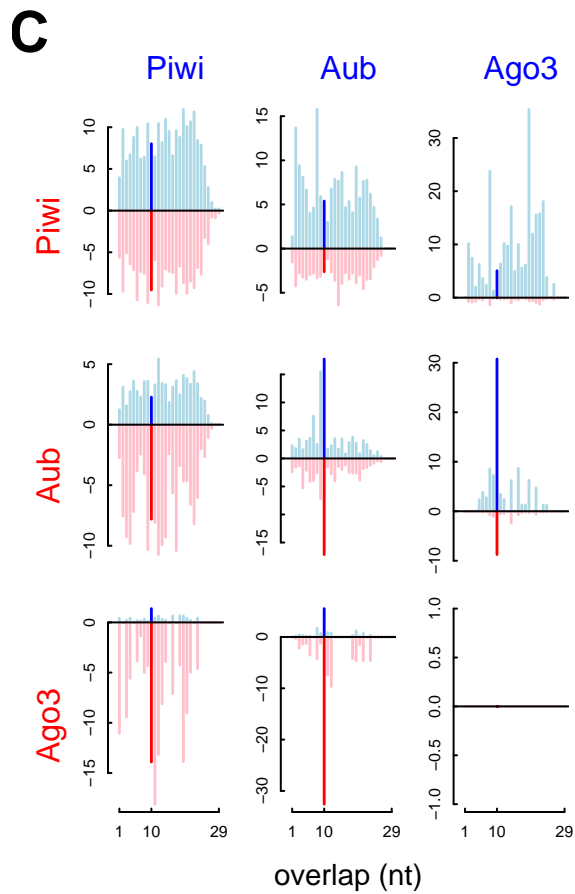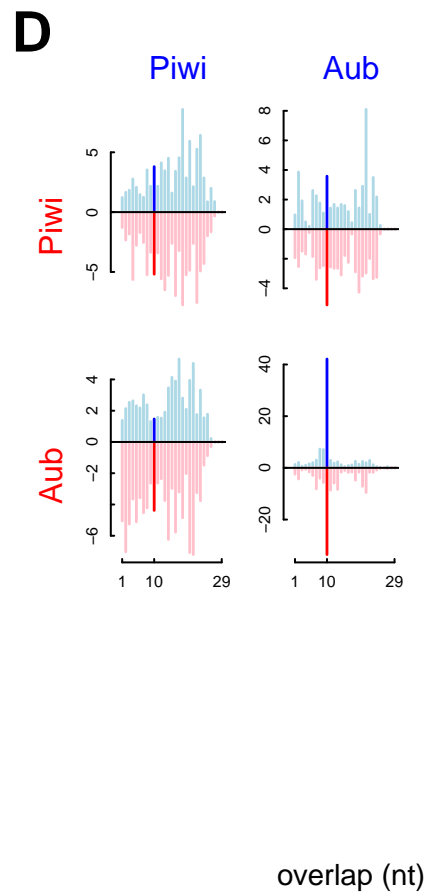

# 3S18

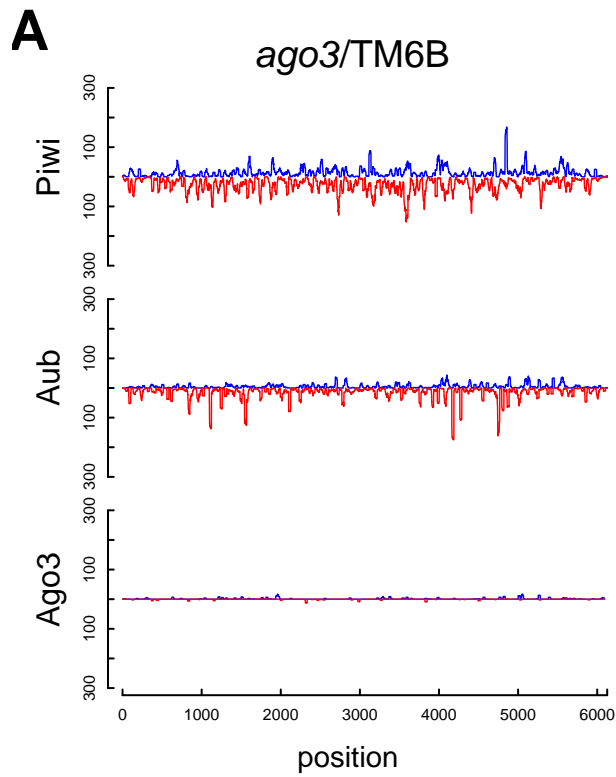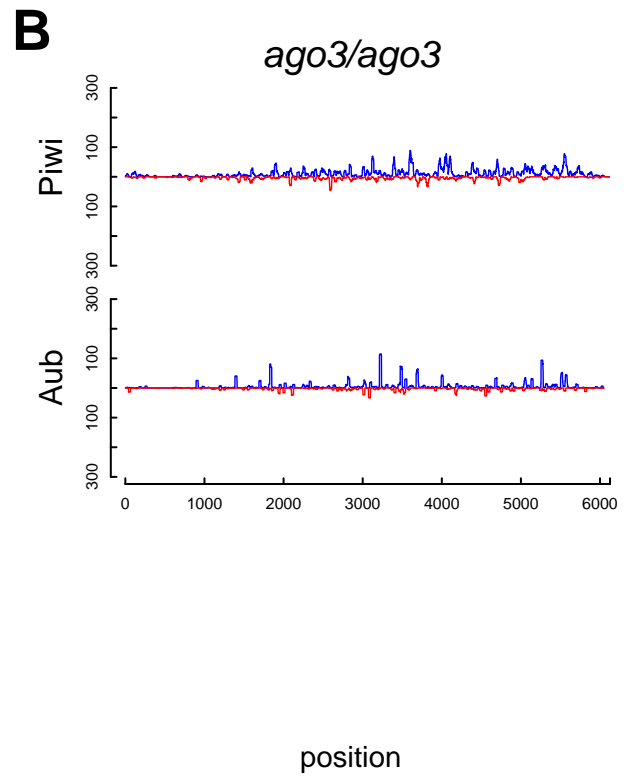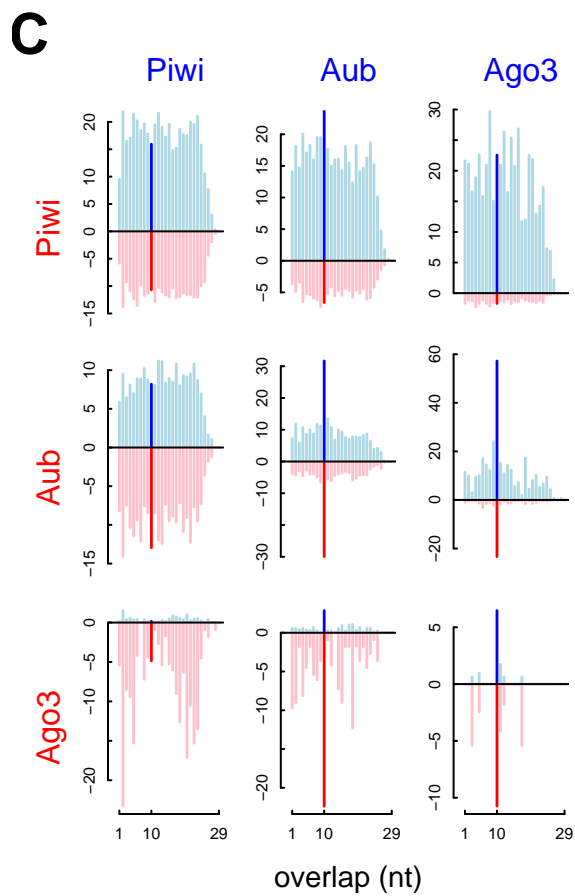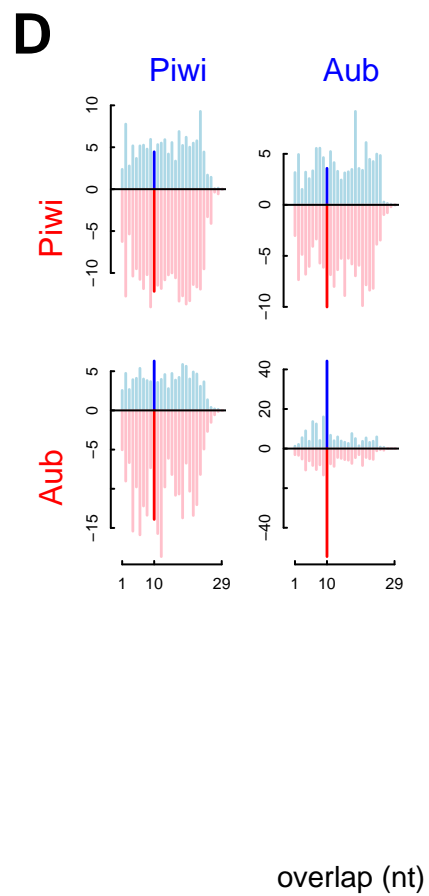

# *accord*

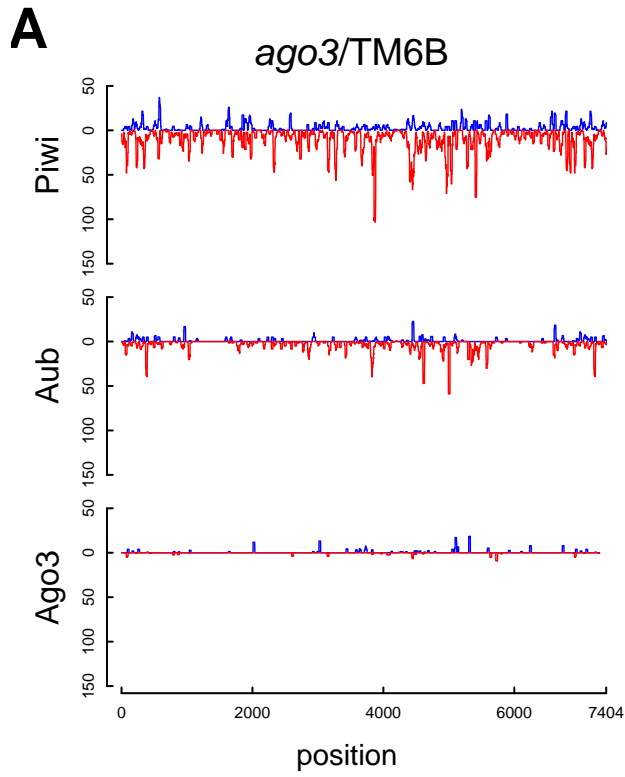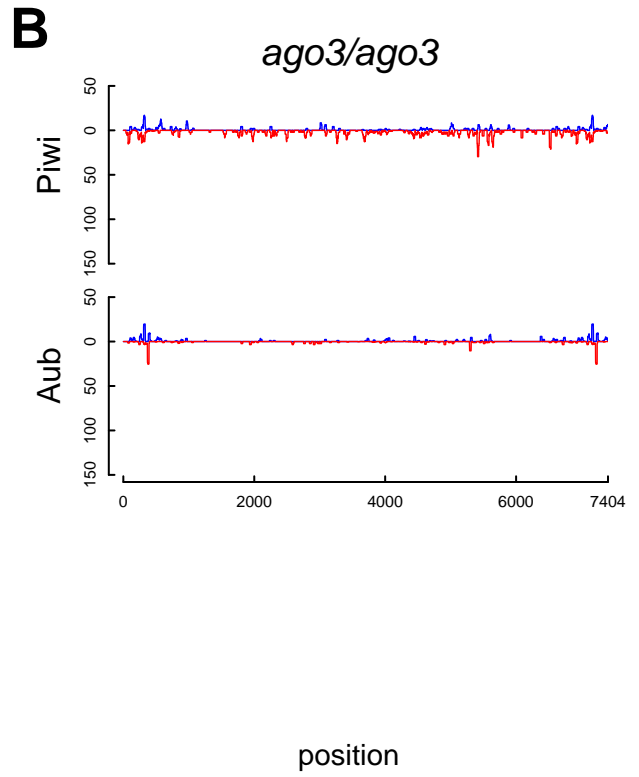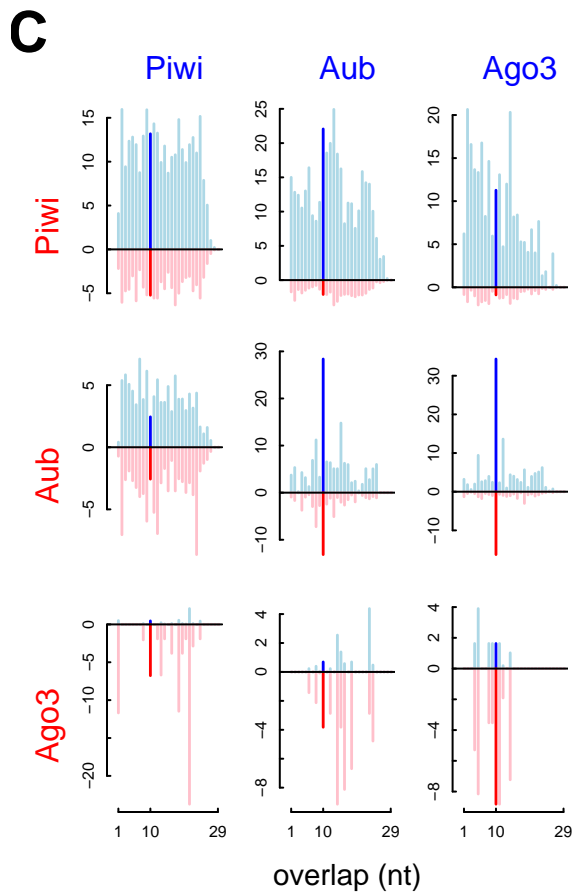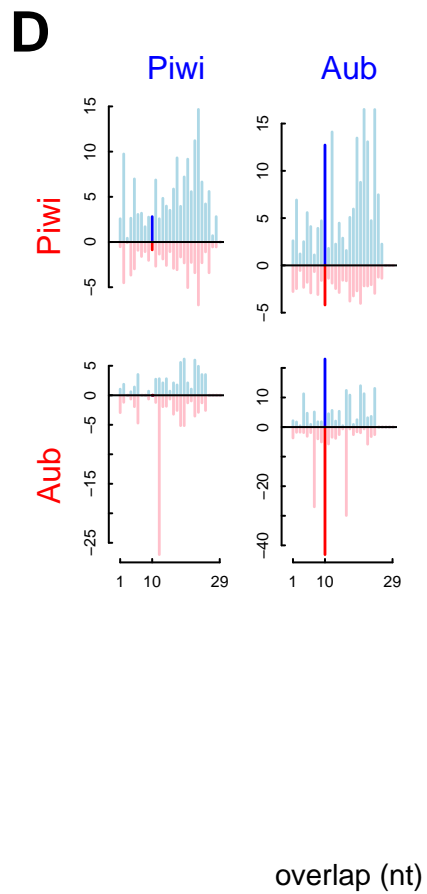

# *accord2*

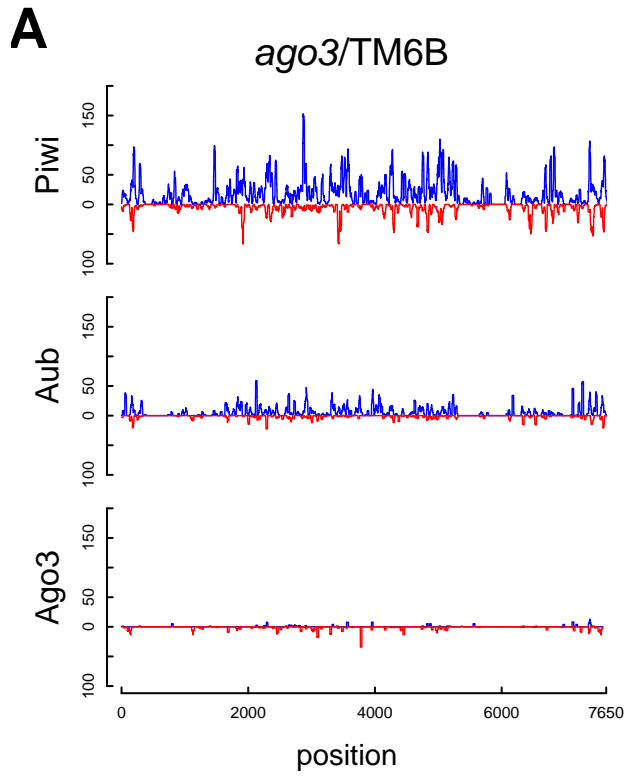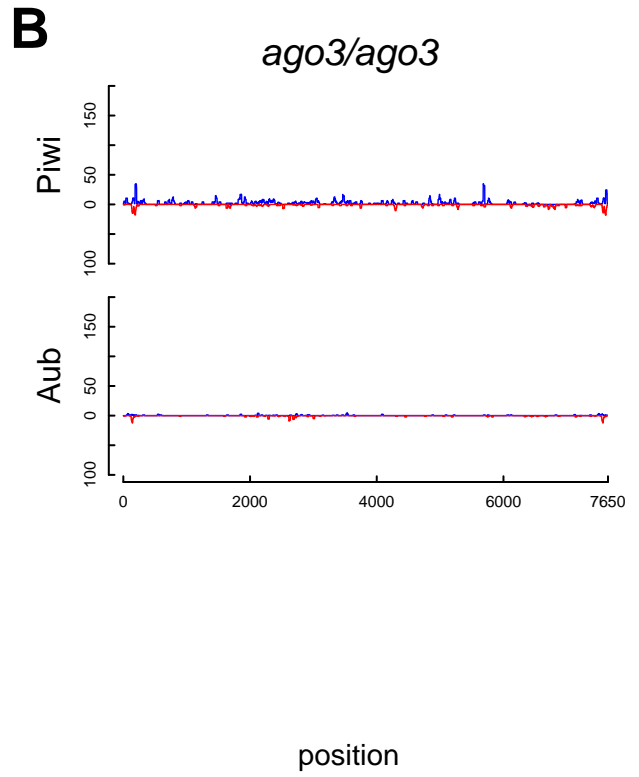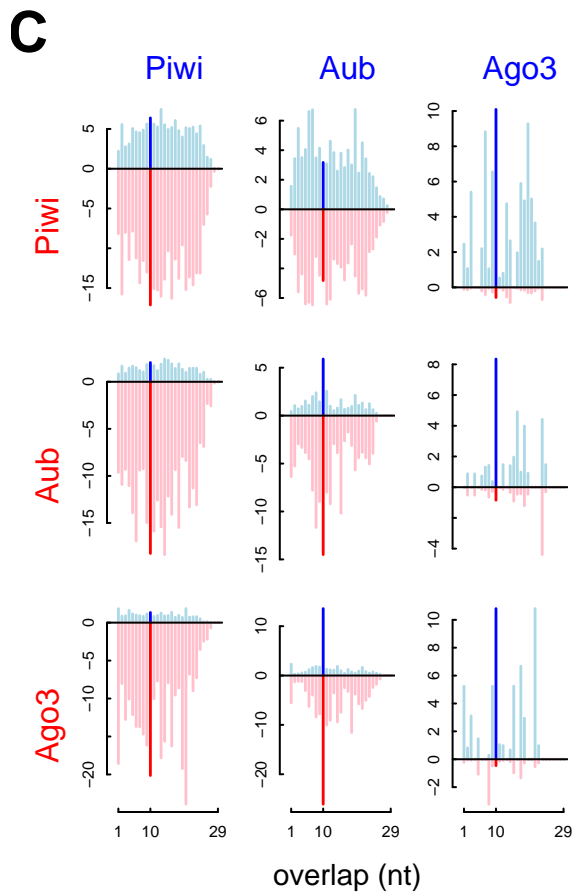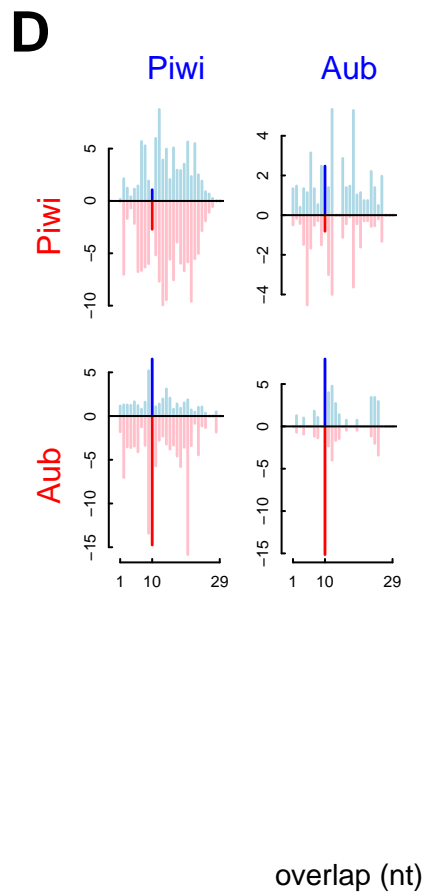

# *aurora element*

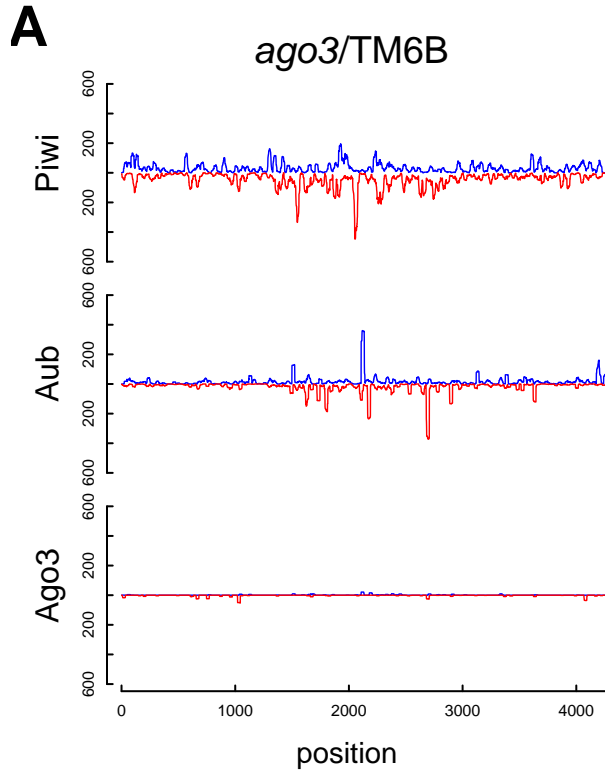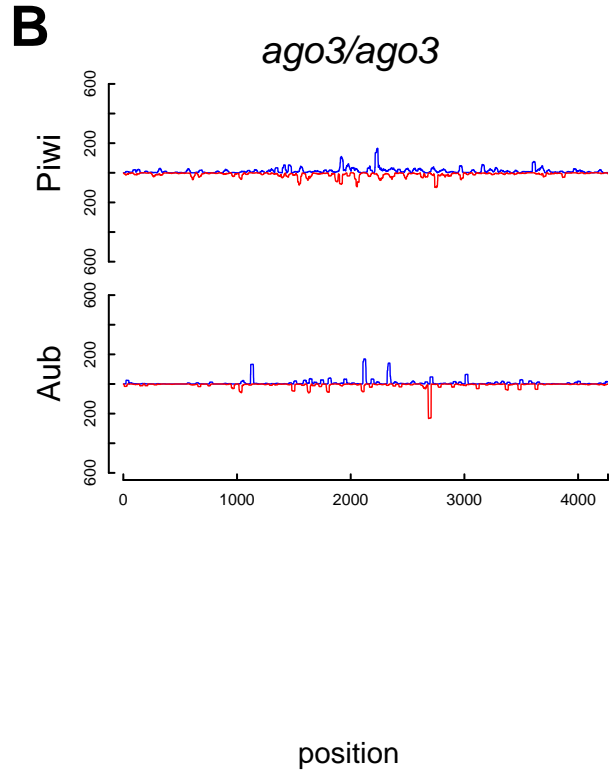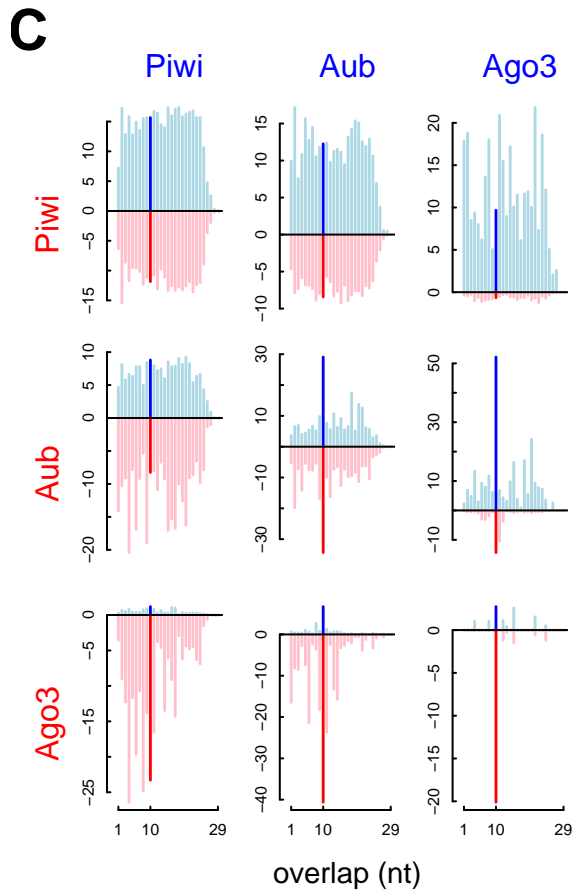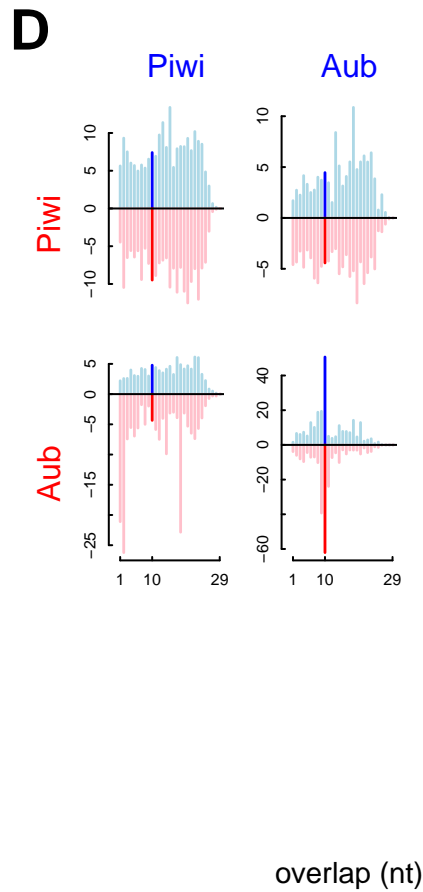

# *baggins*

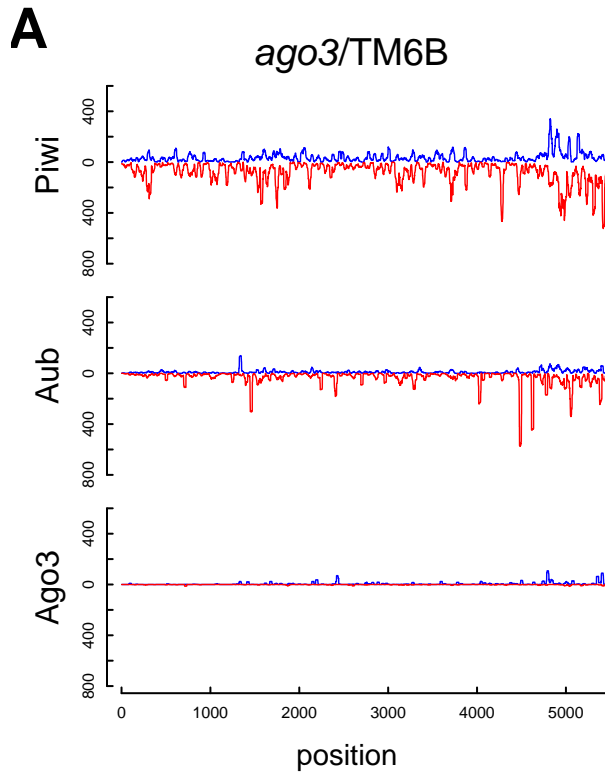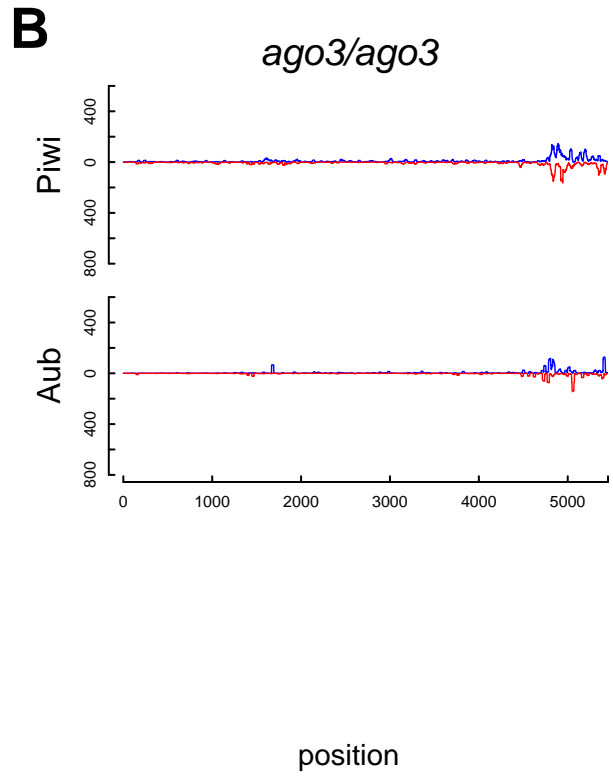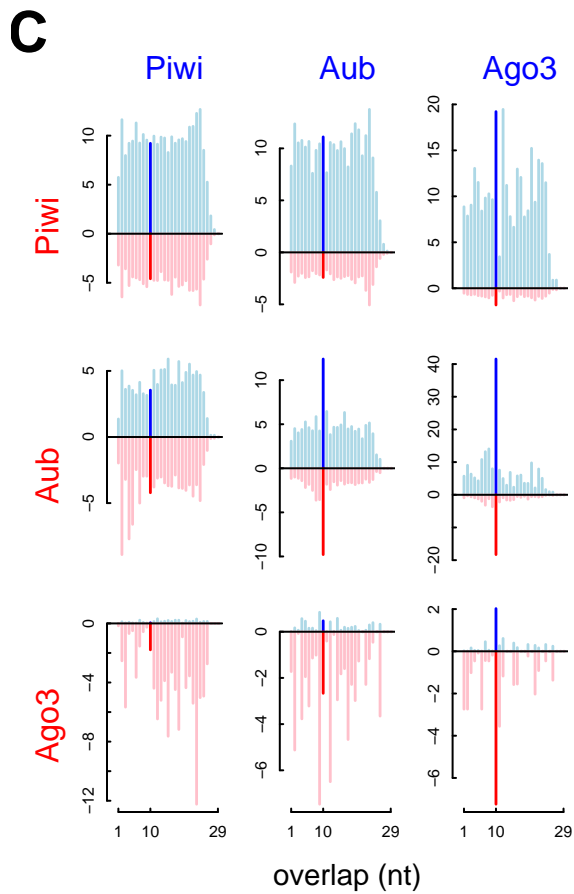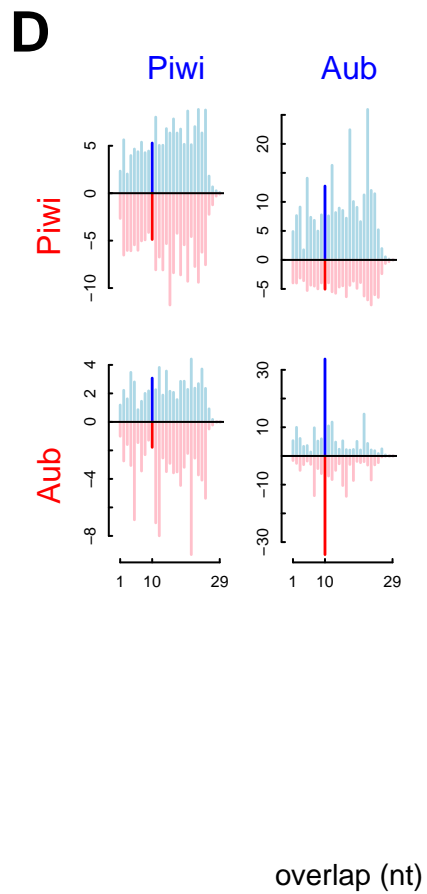

# Bari1

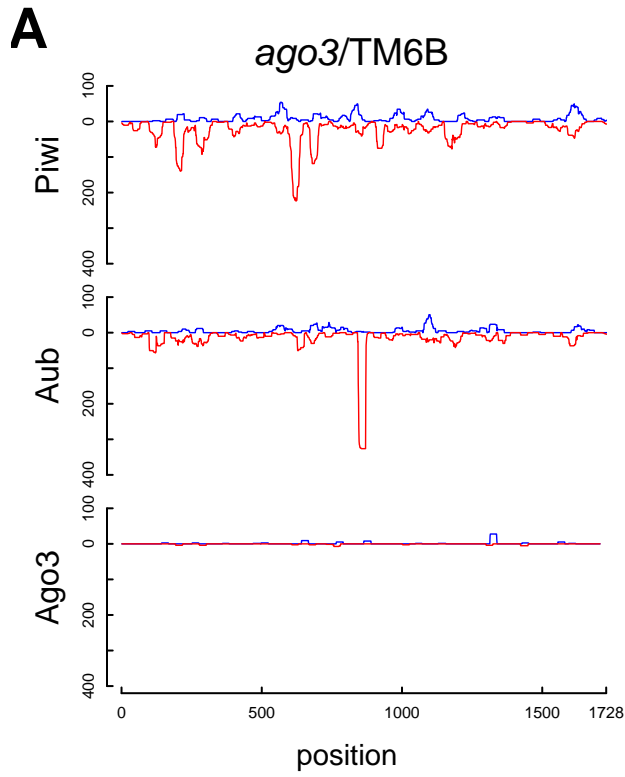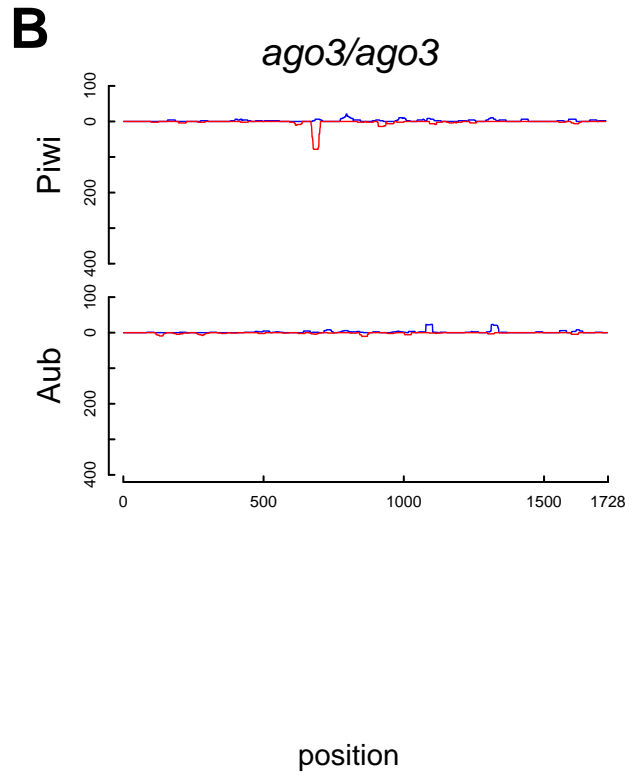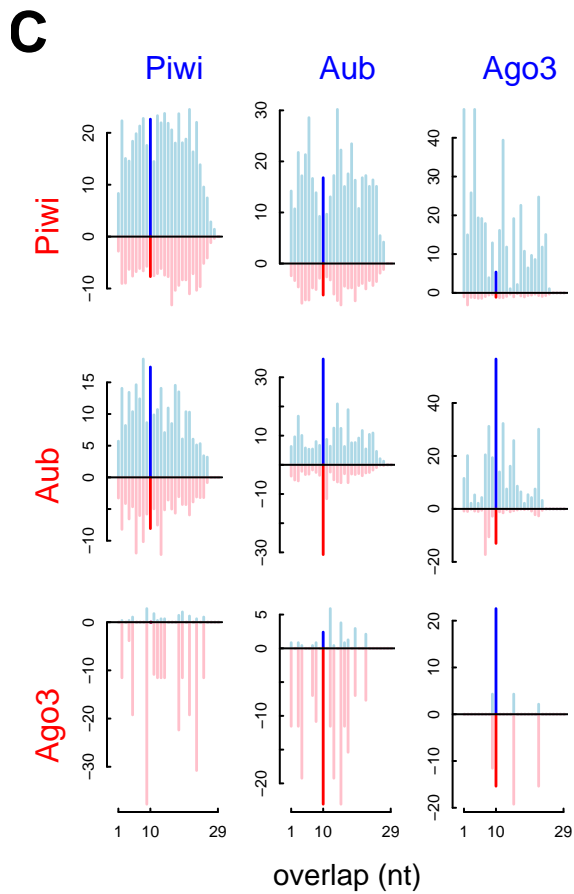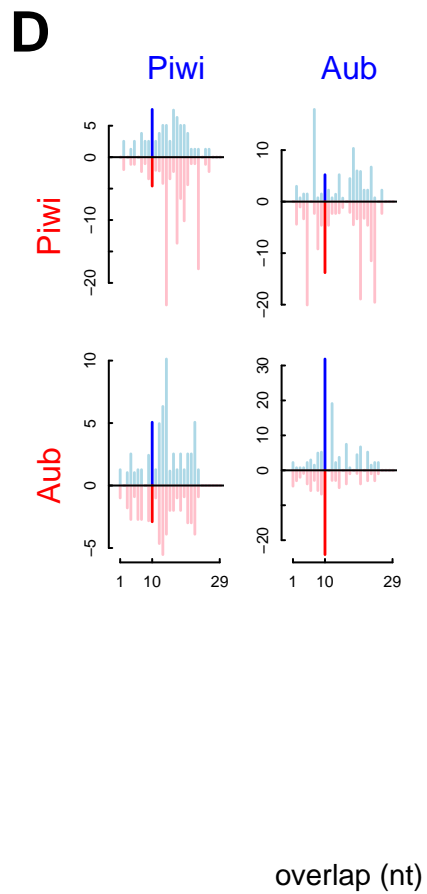



# *blood*

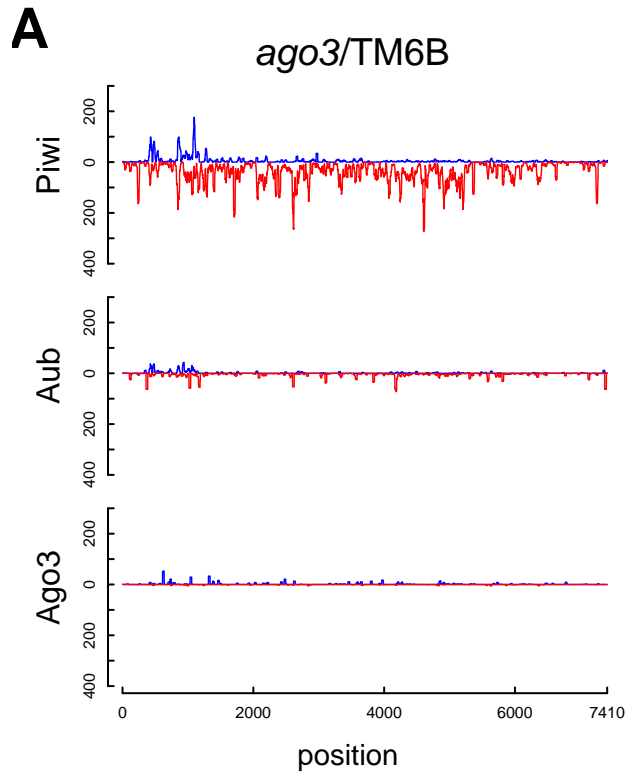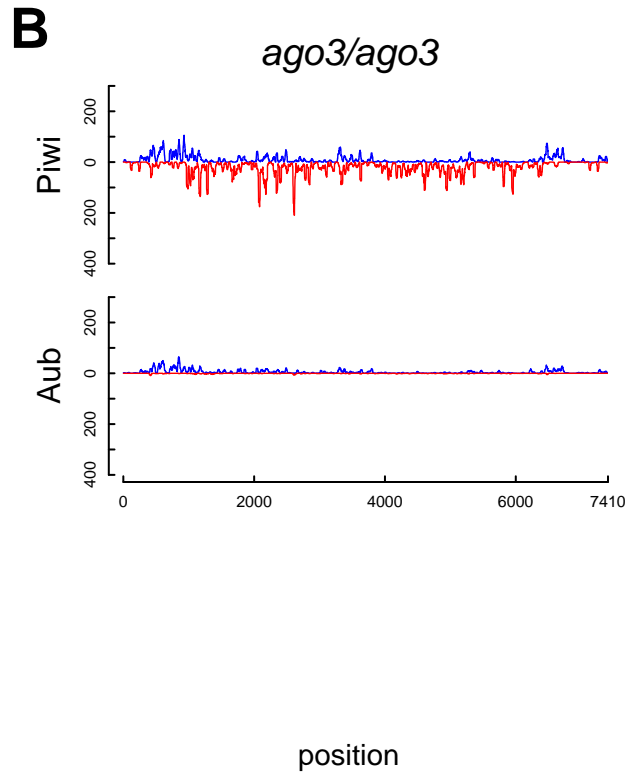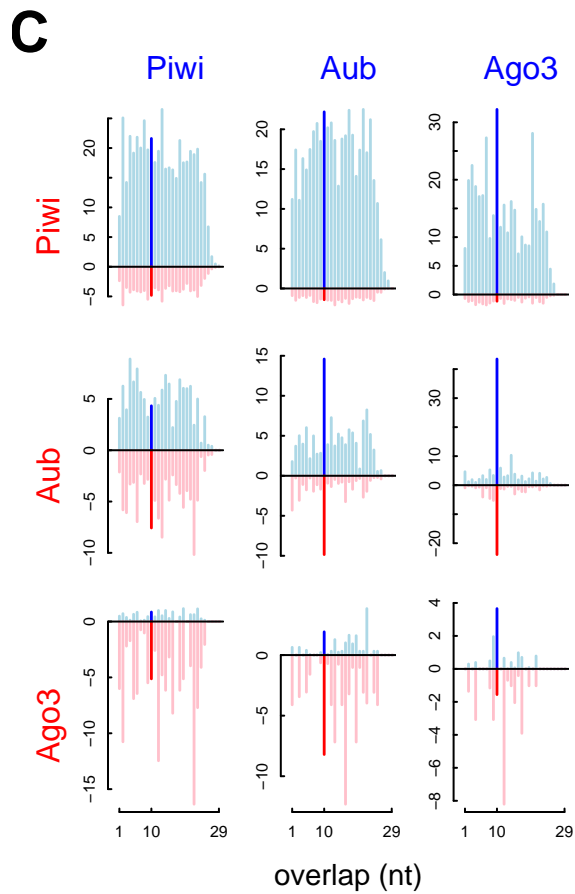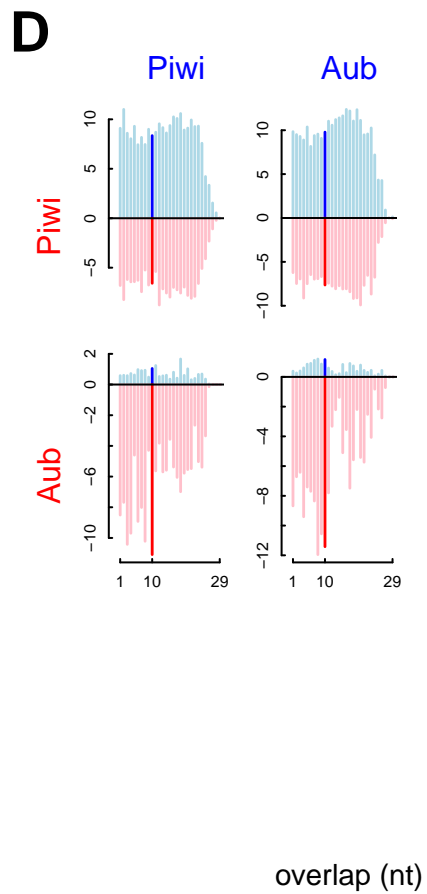

# BS

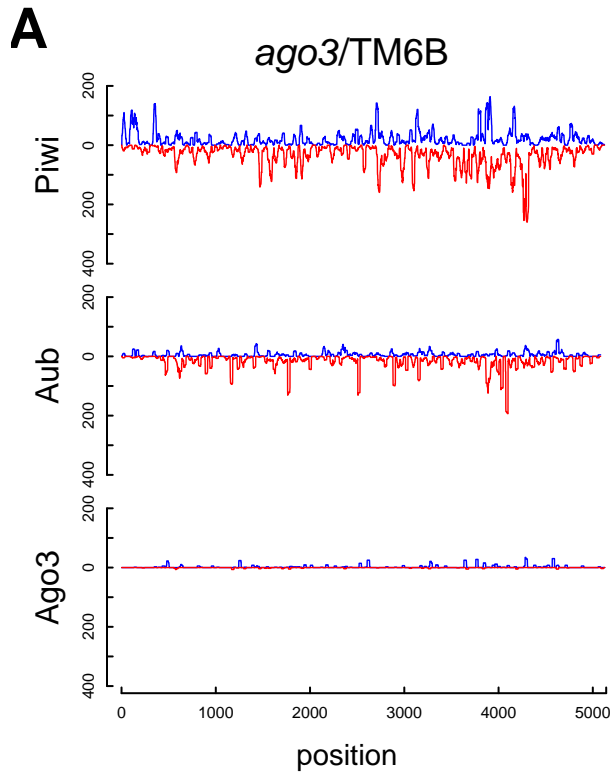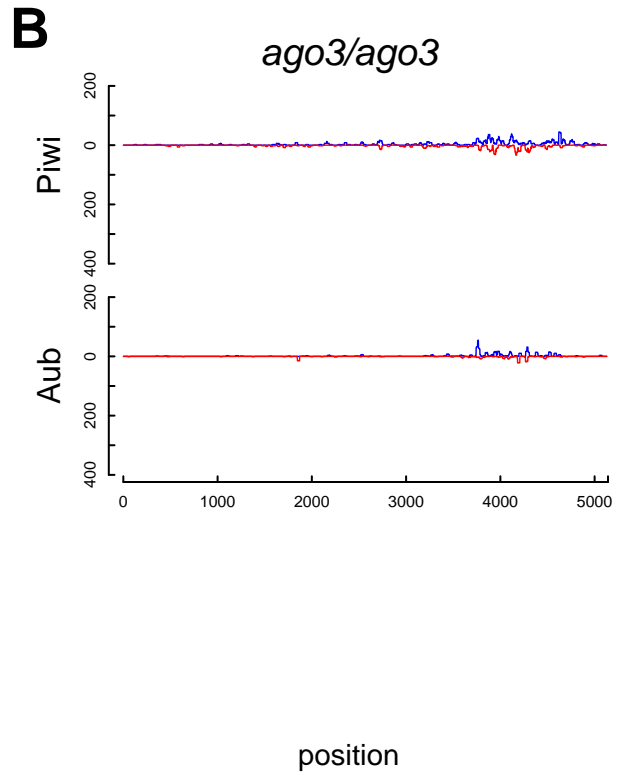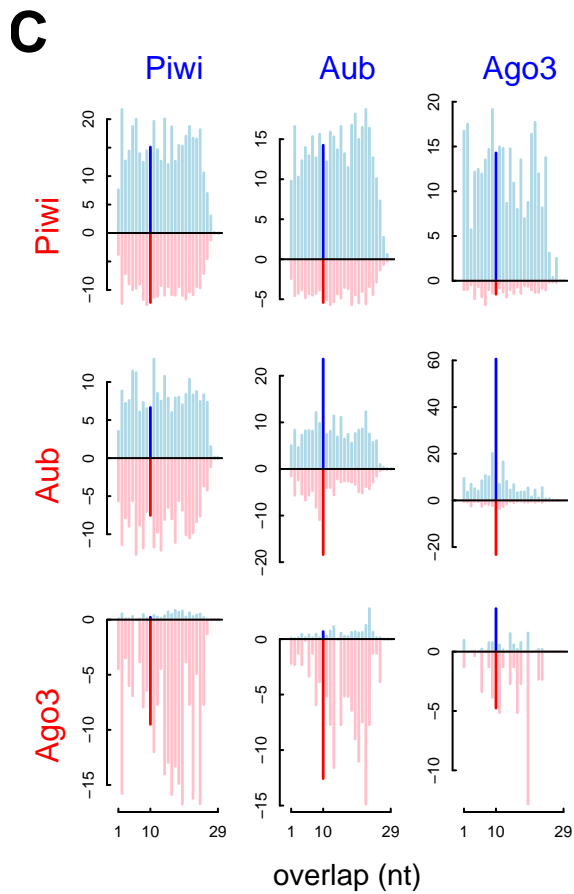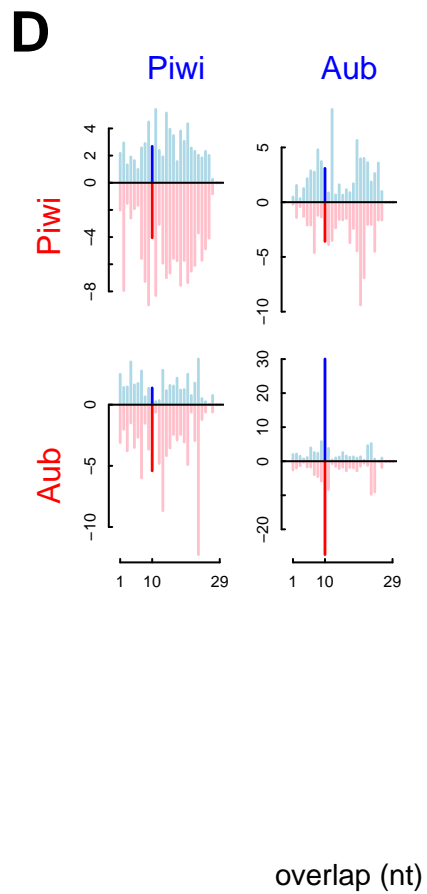

# BS3

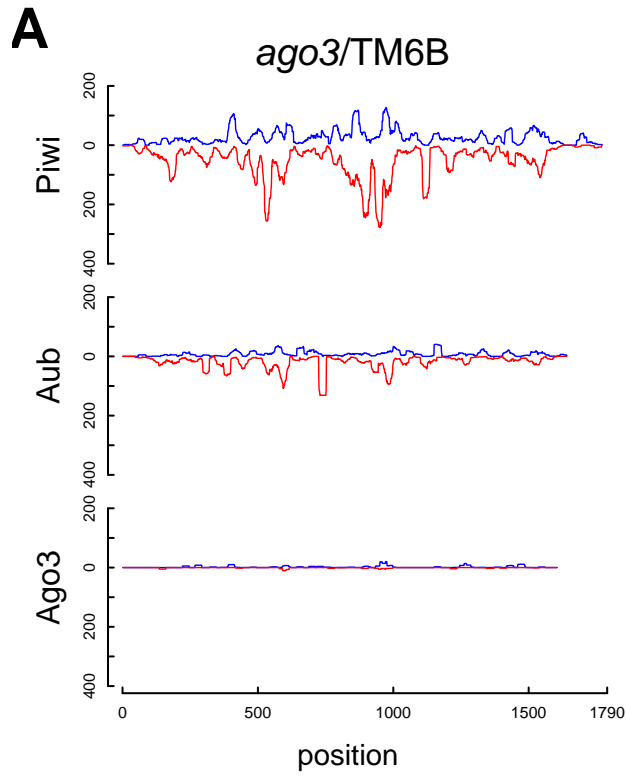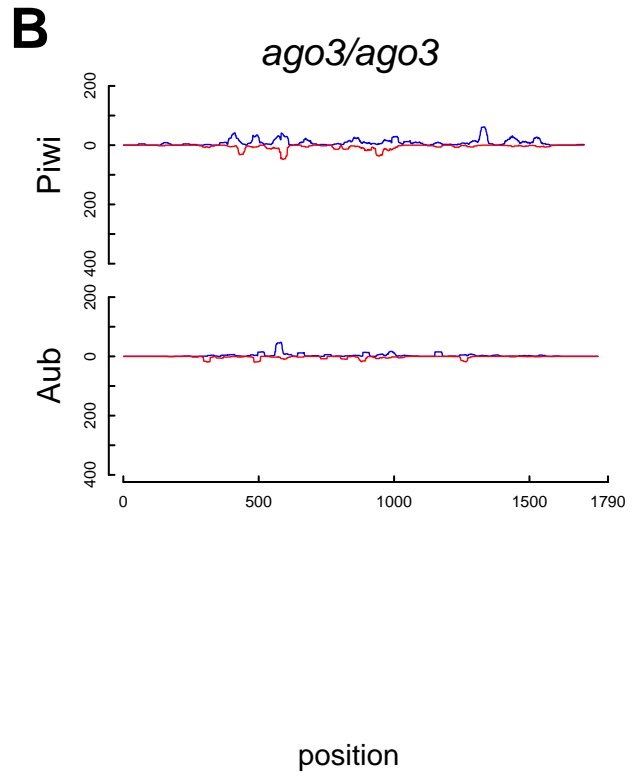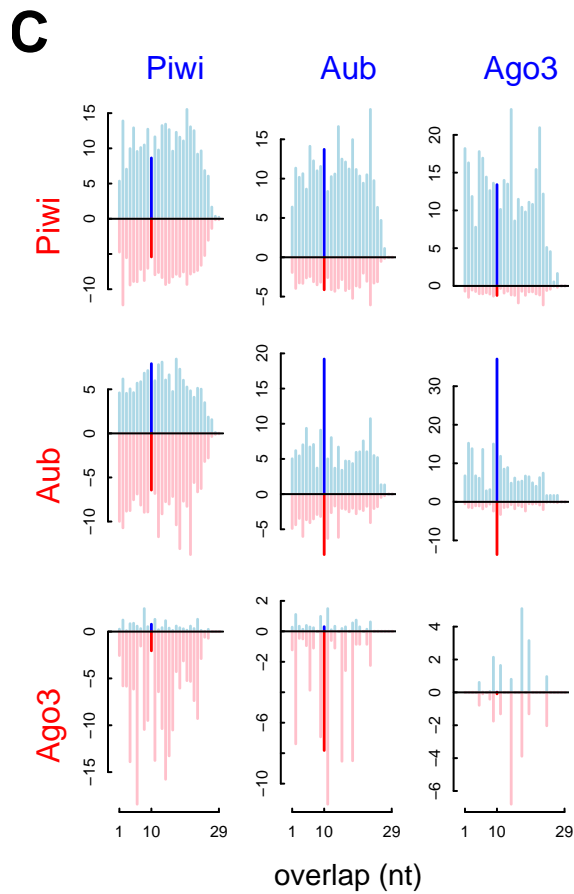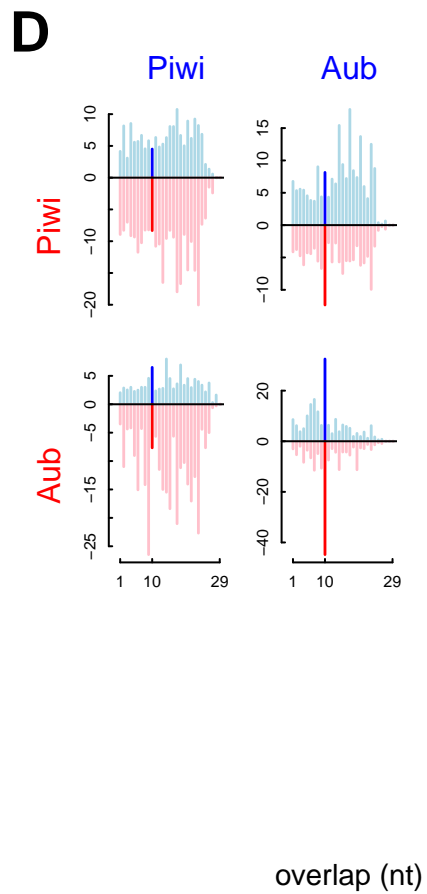

# Burdock

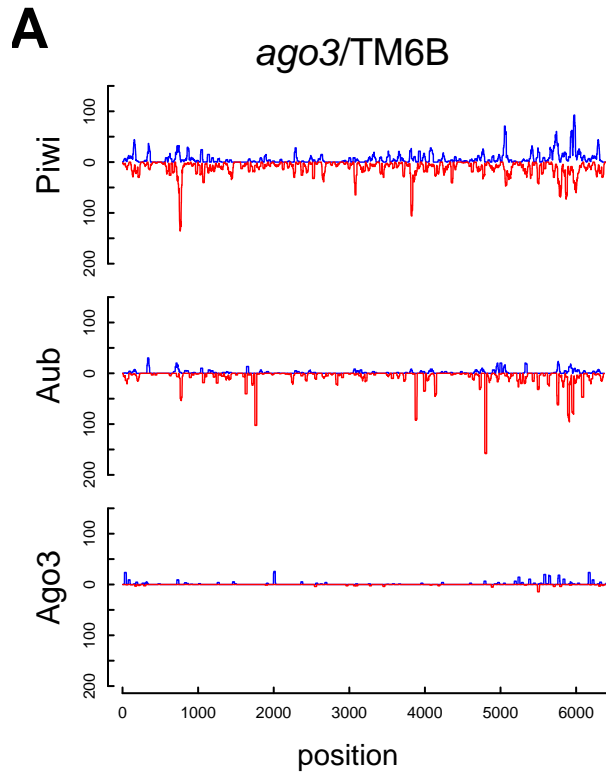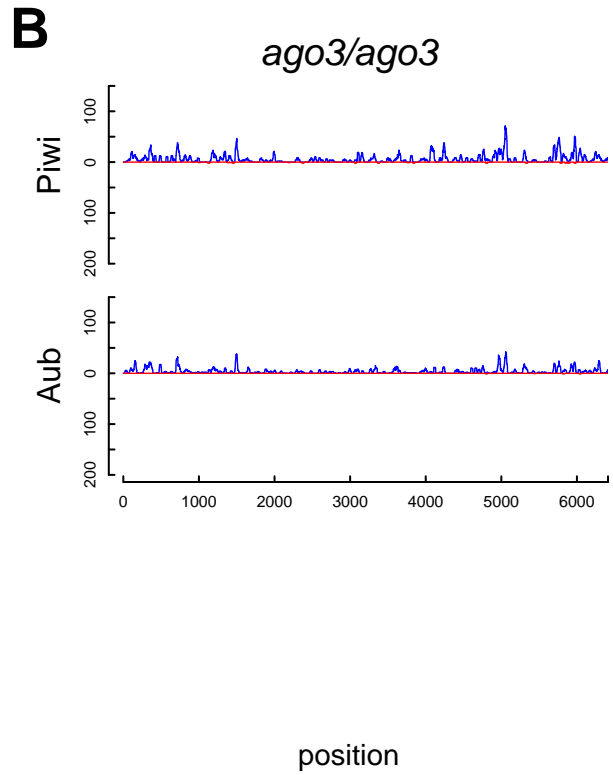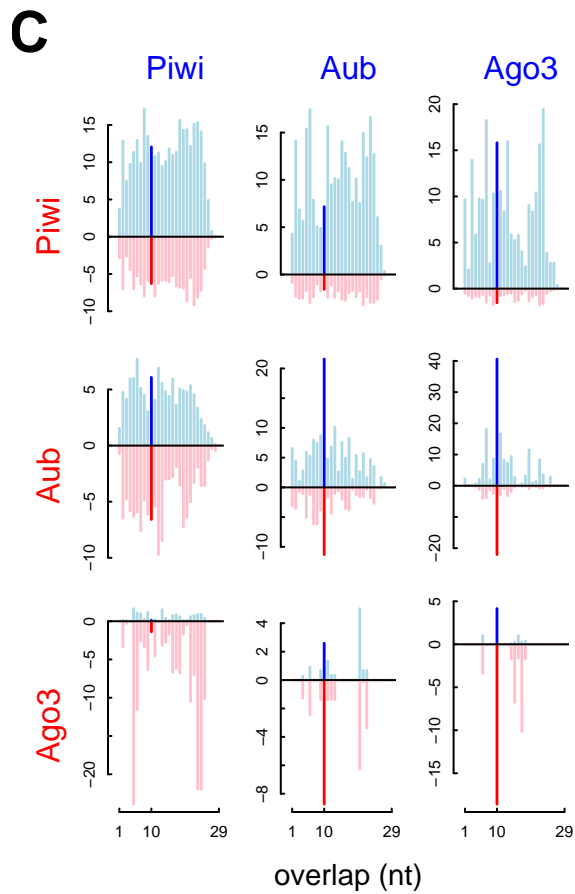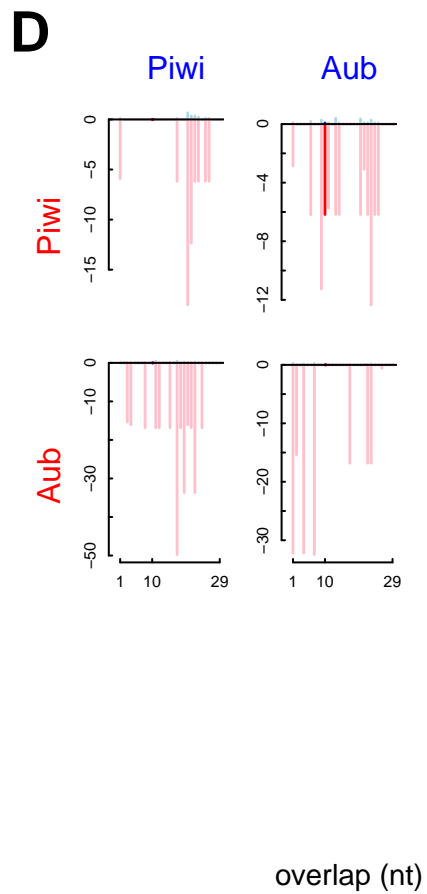

# Circe

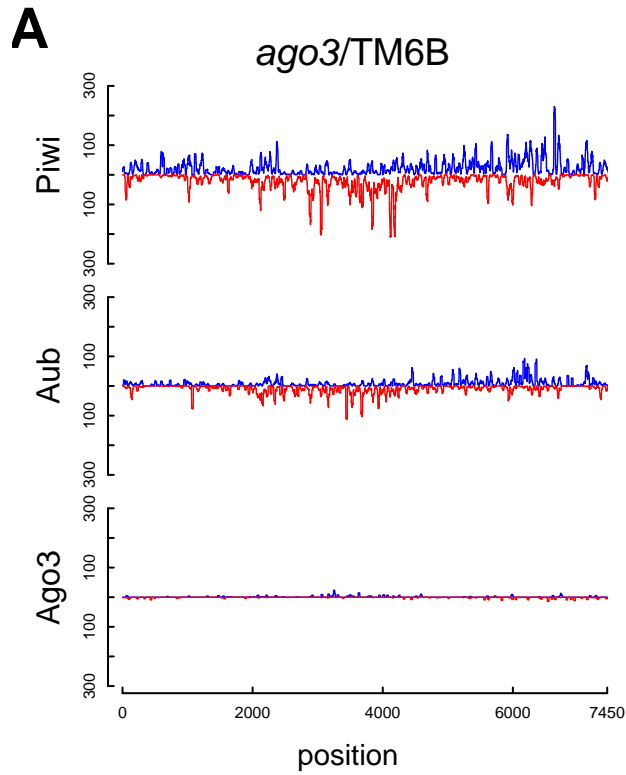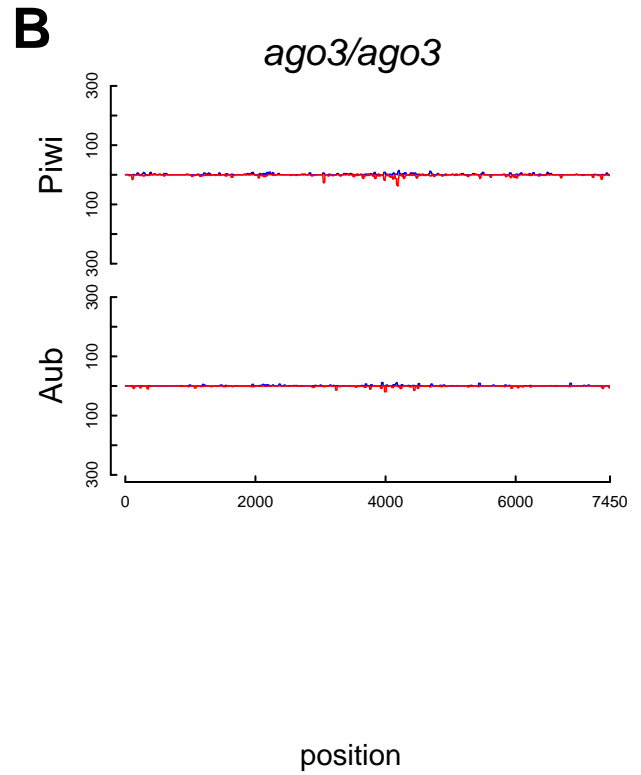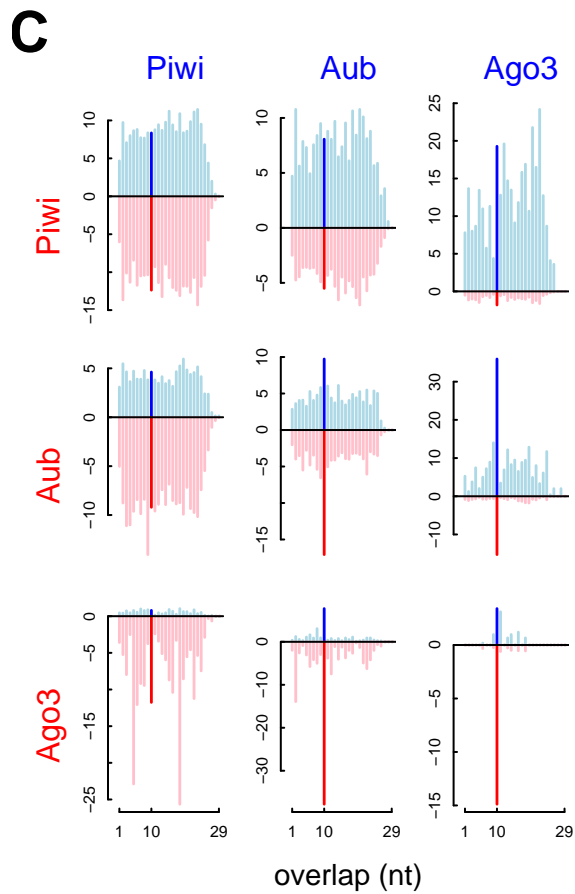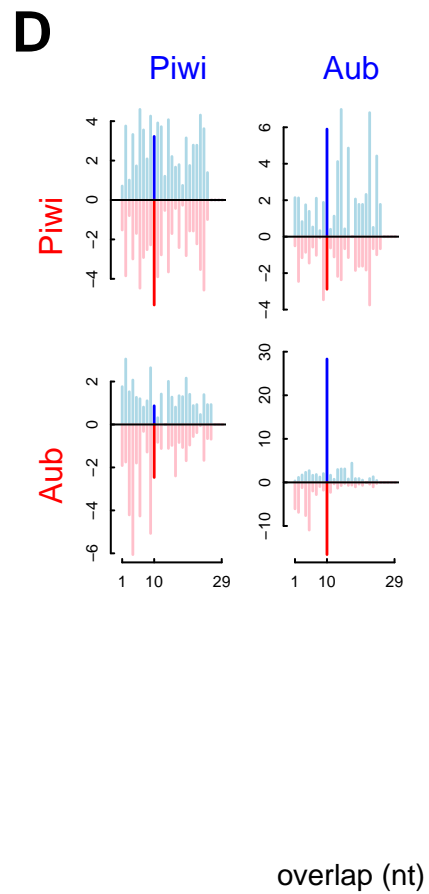

# *copia*

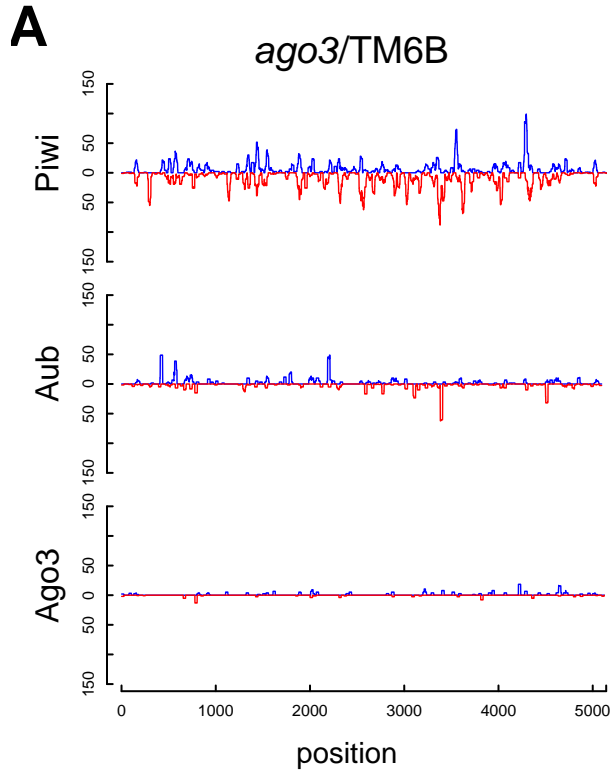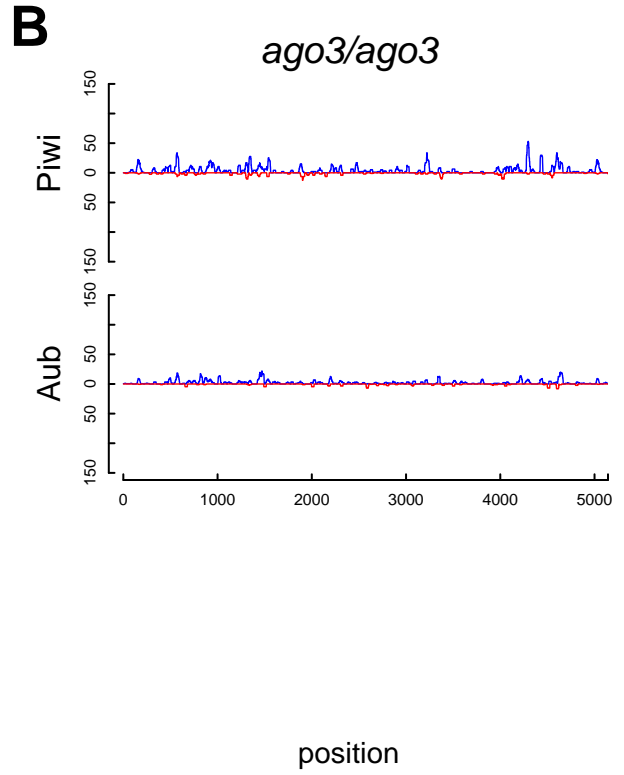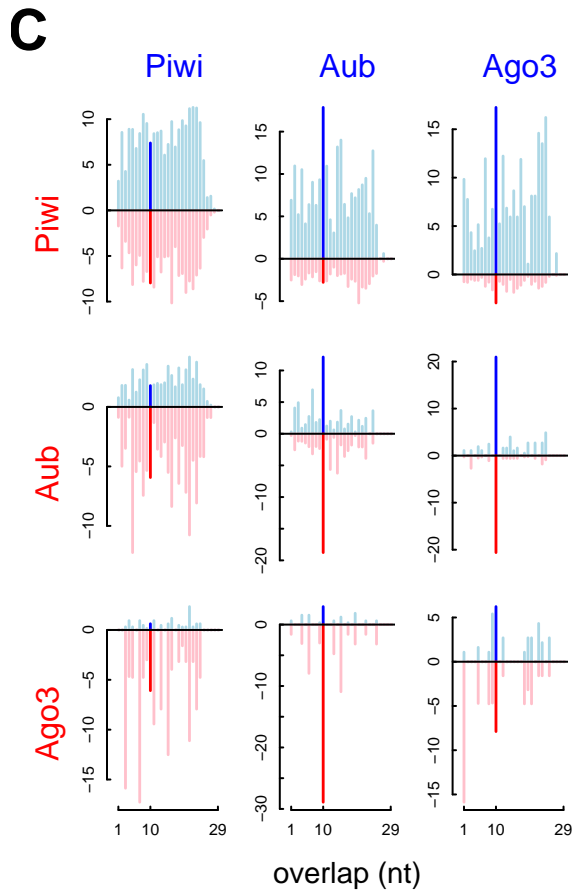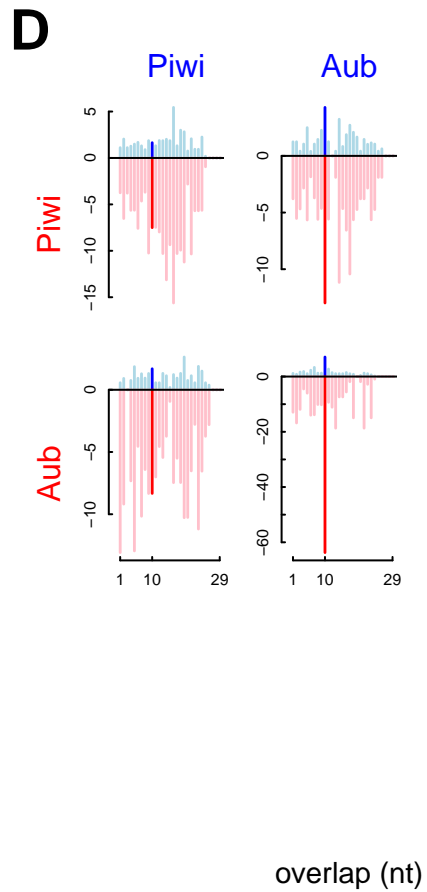

# Cr1a

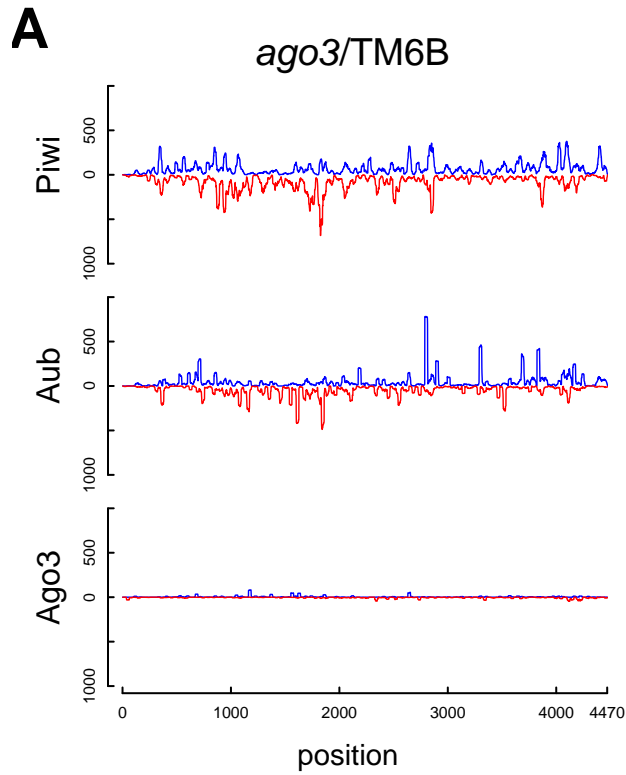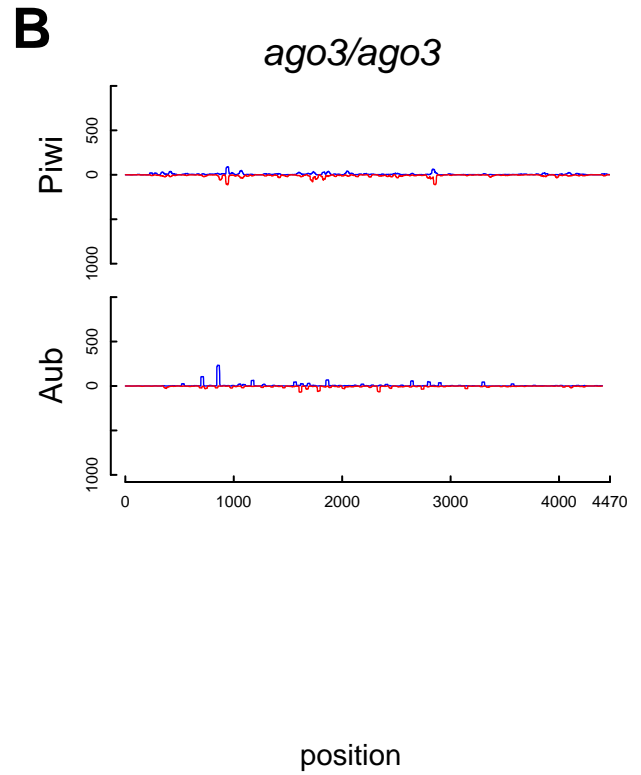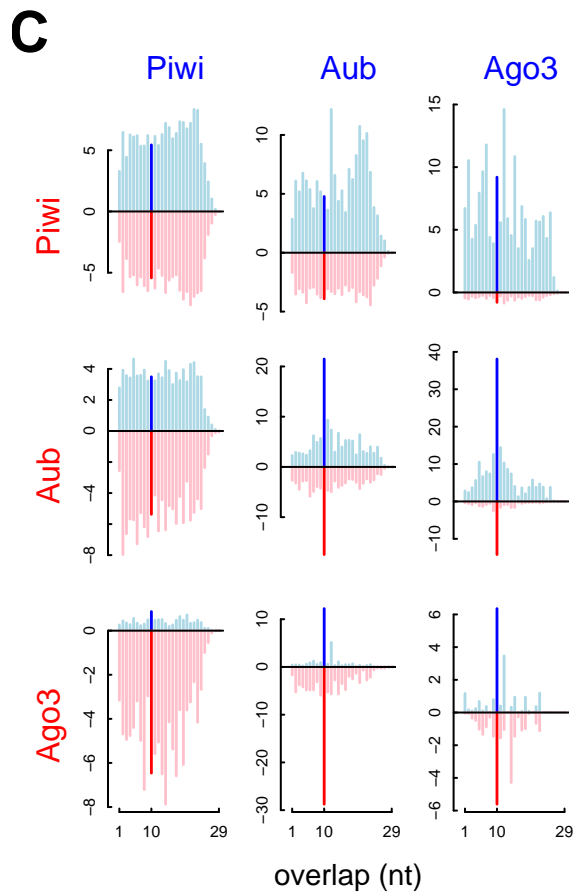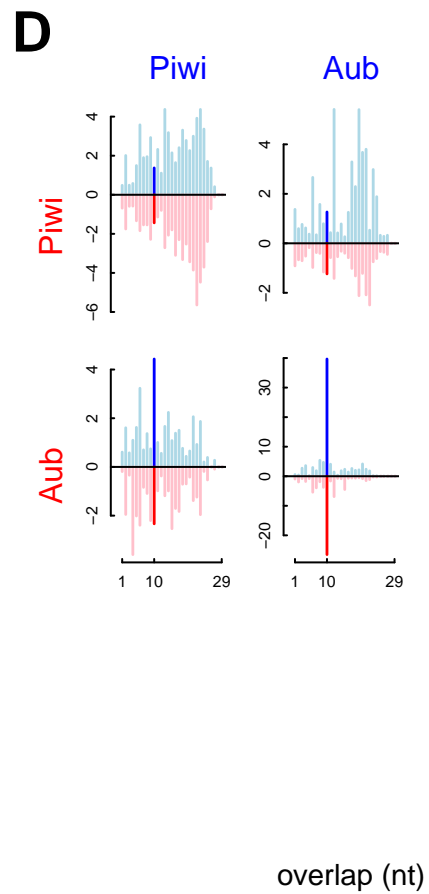

# *diver*

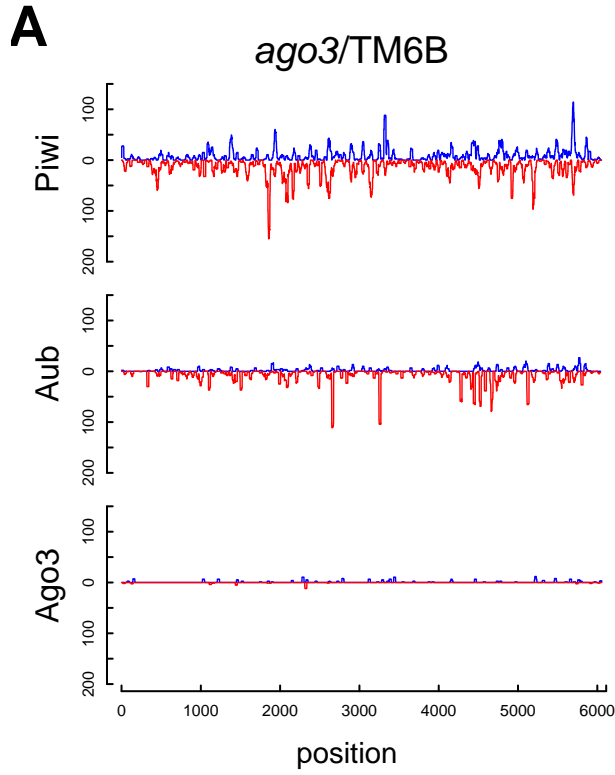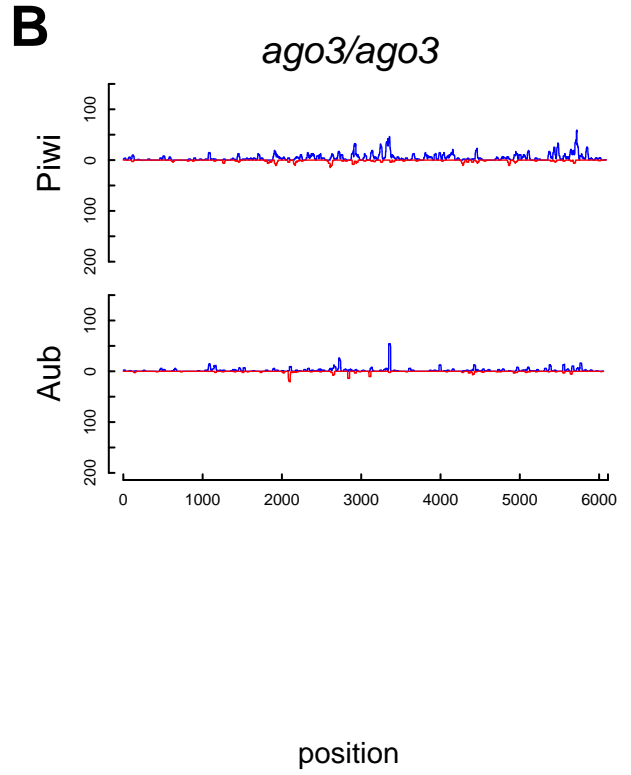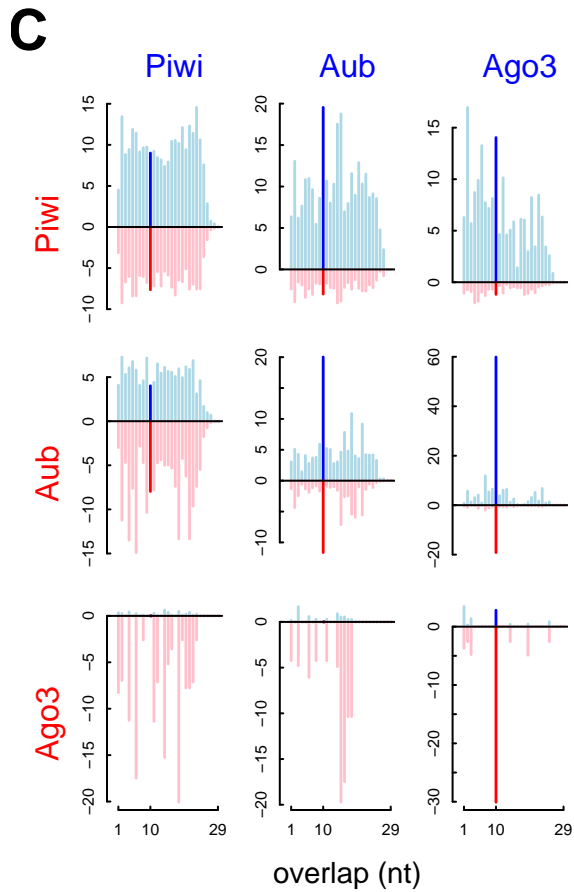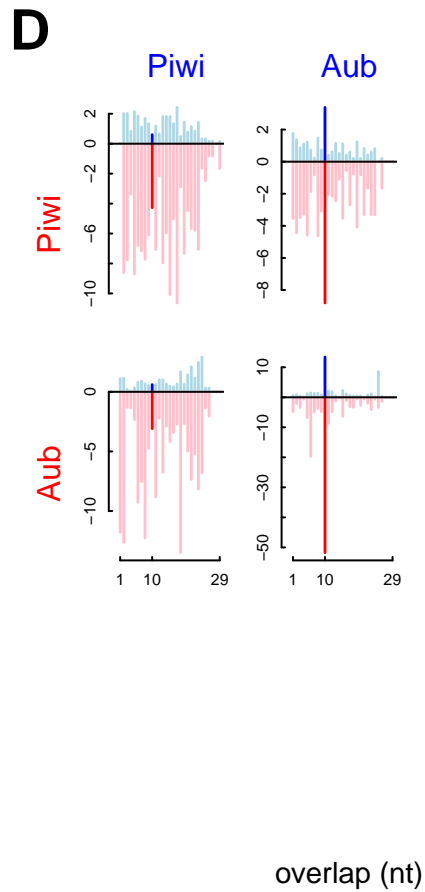



# *diver2*

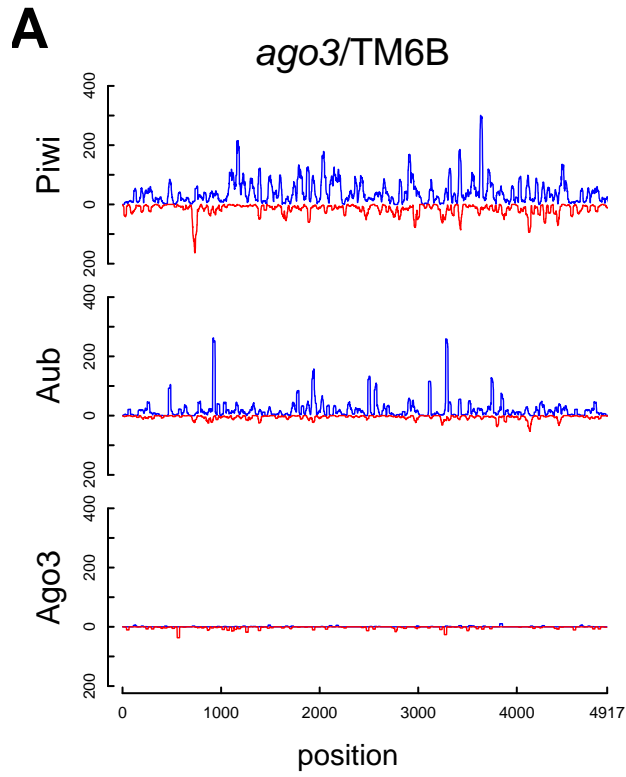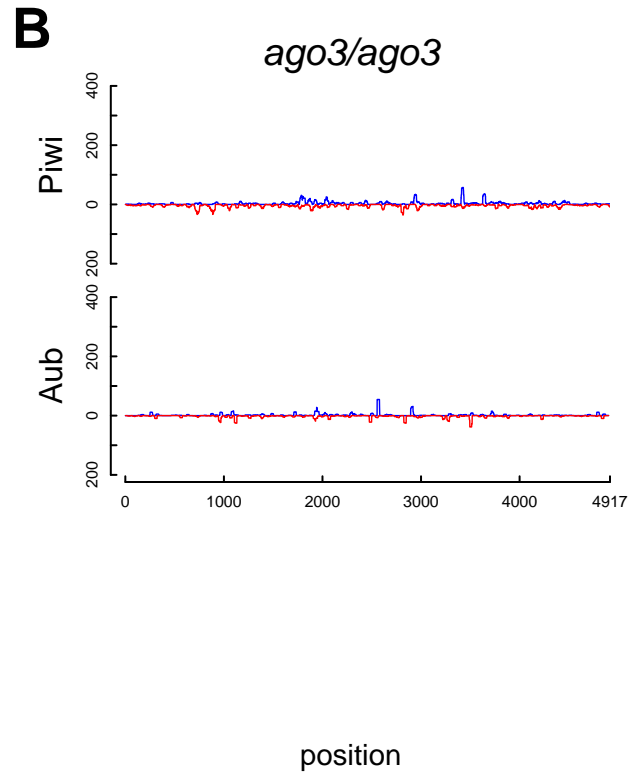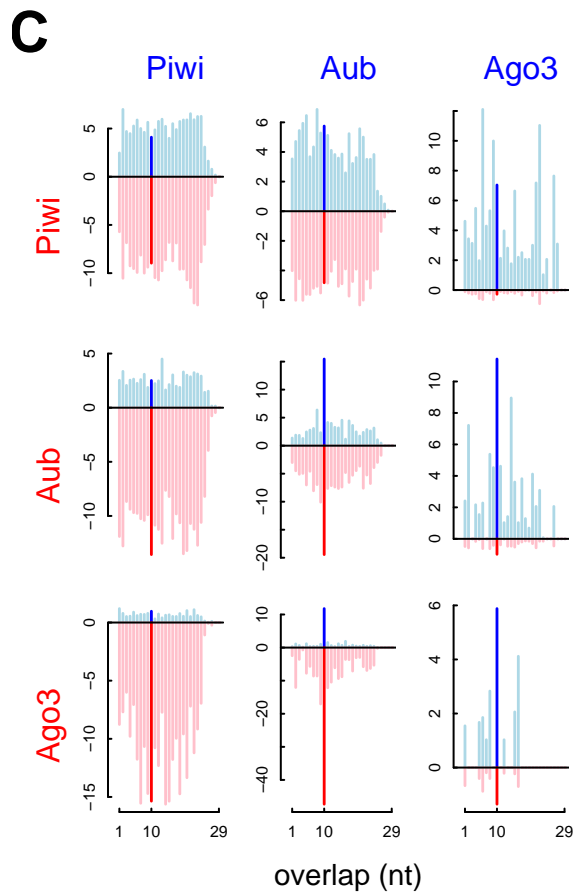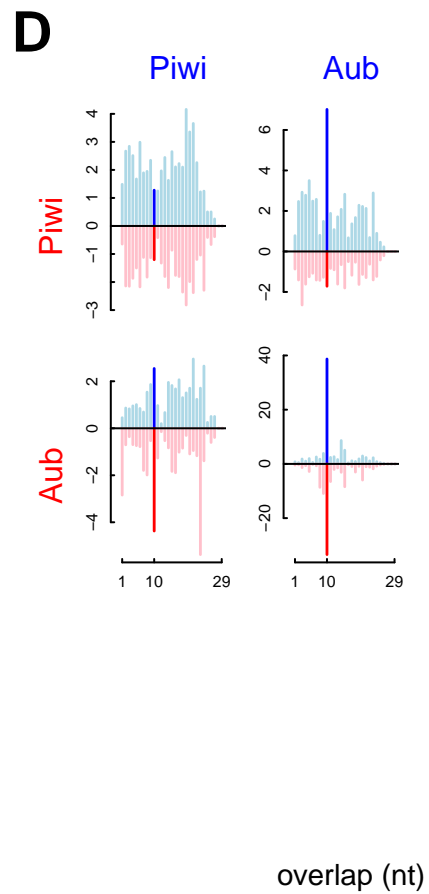

# Dm88

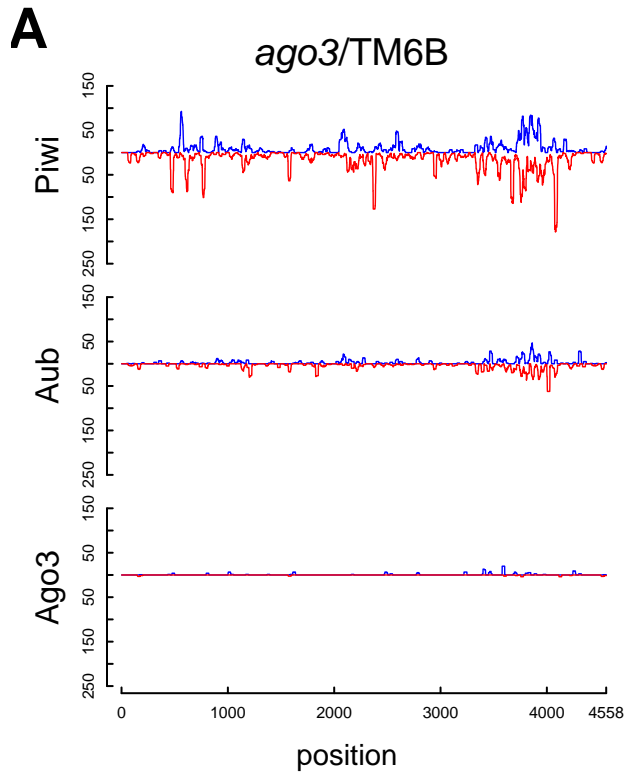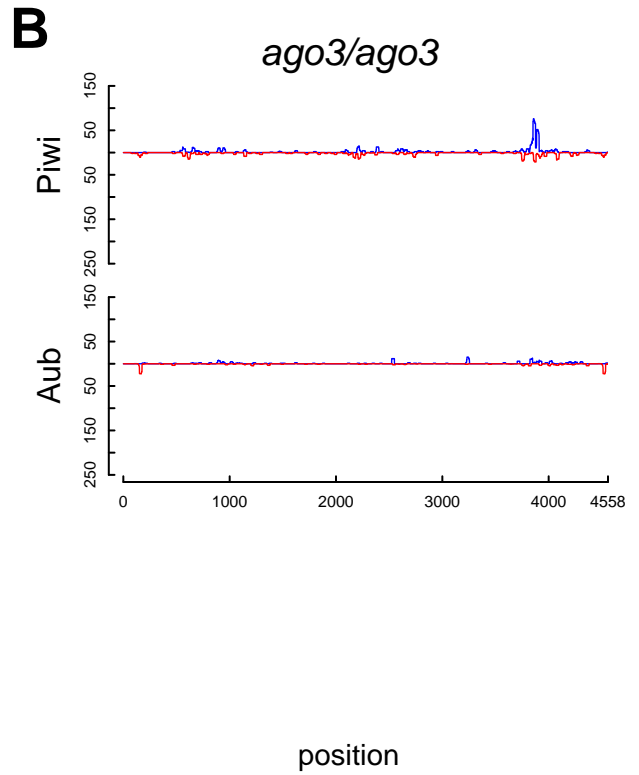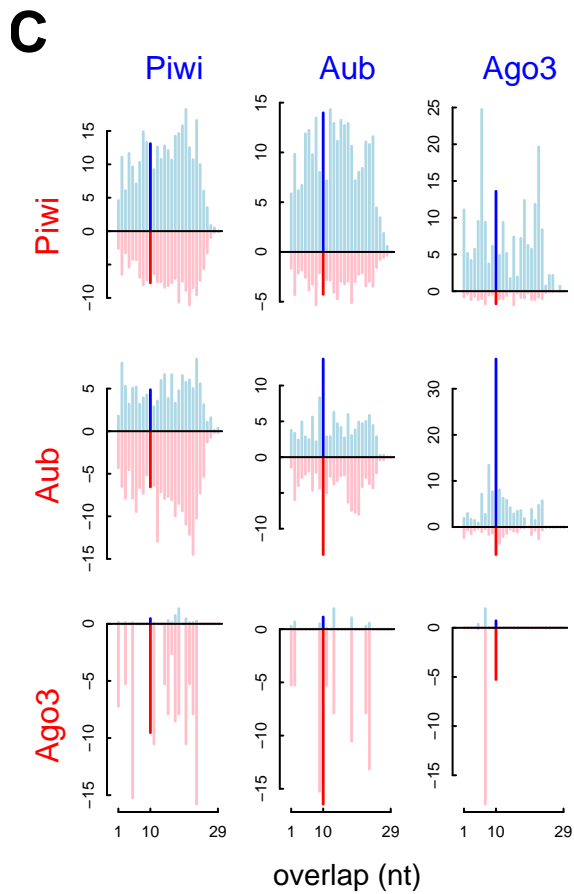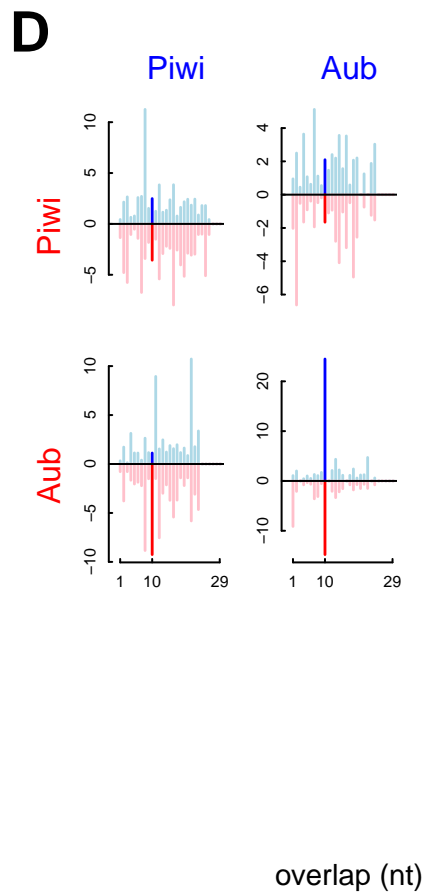

# Doc

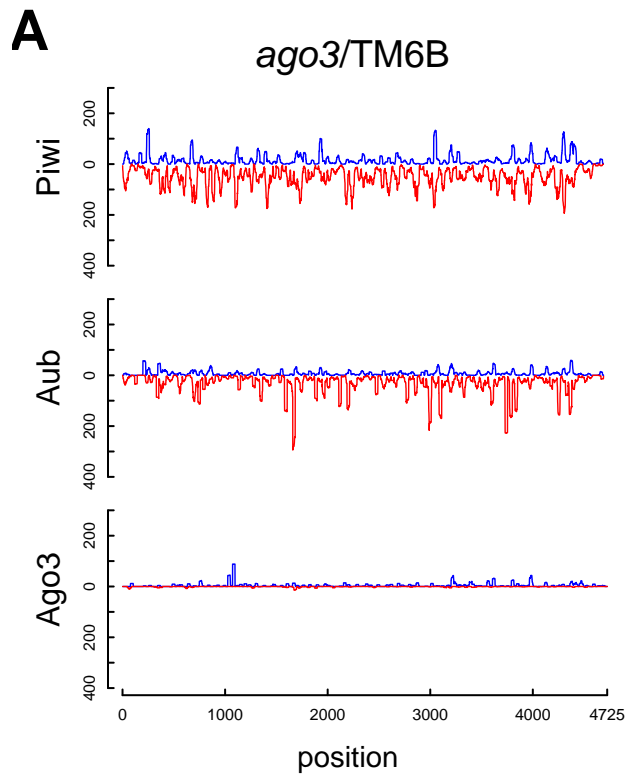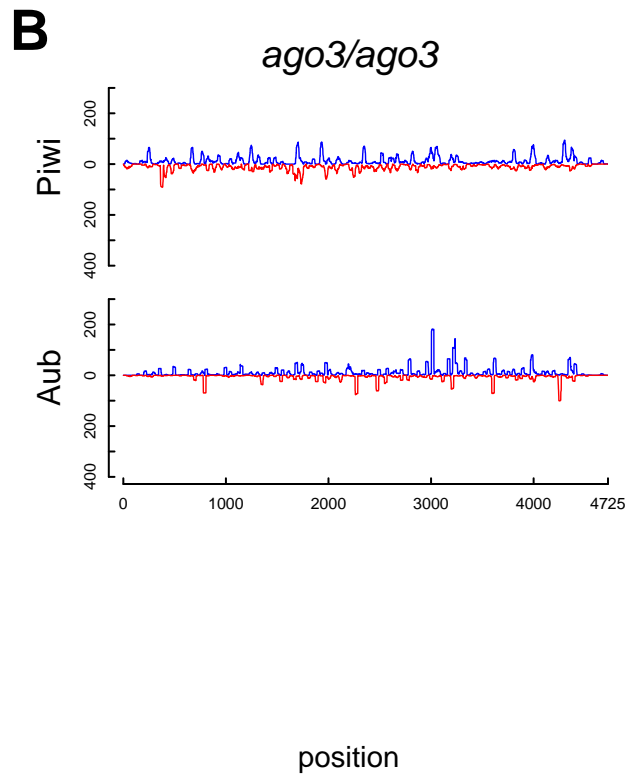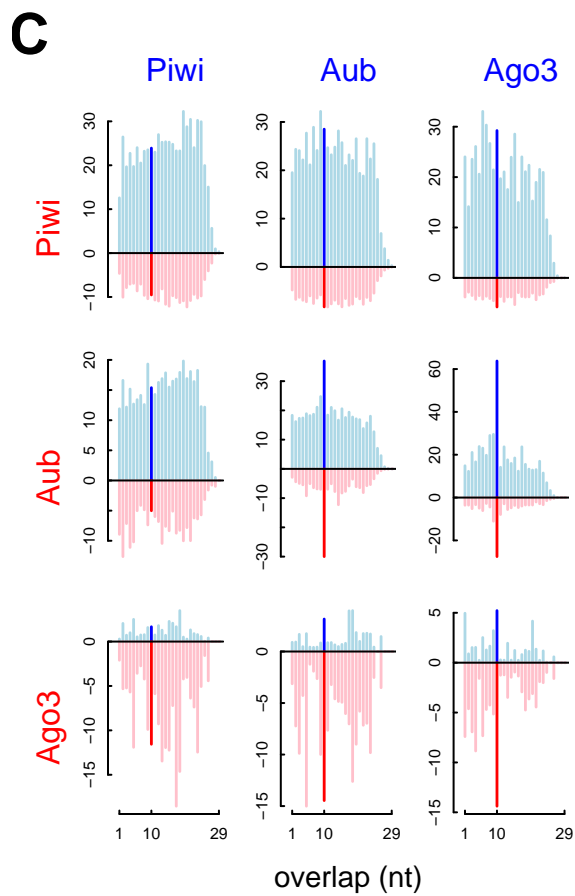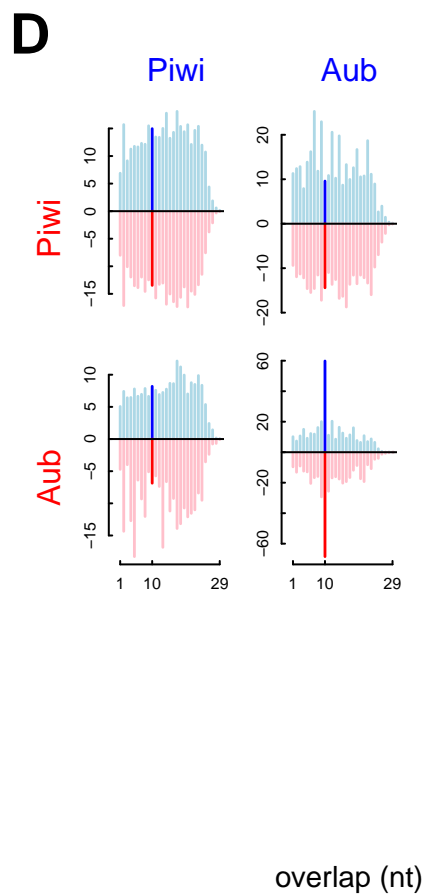

# Doc2 element

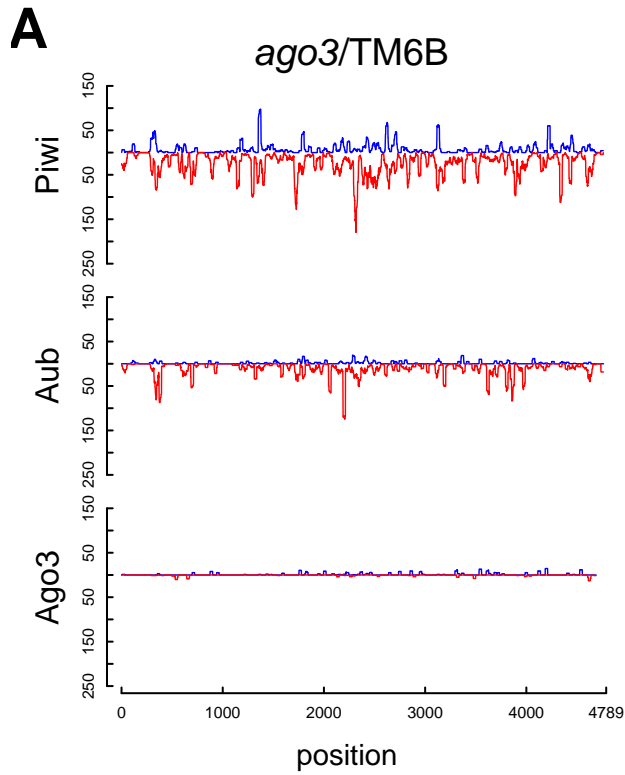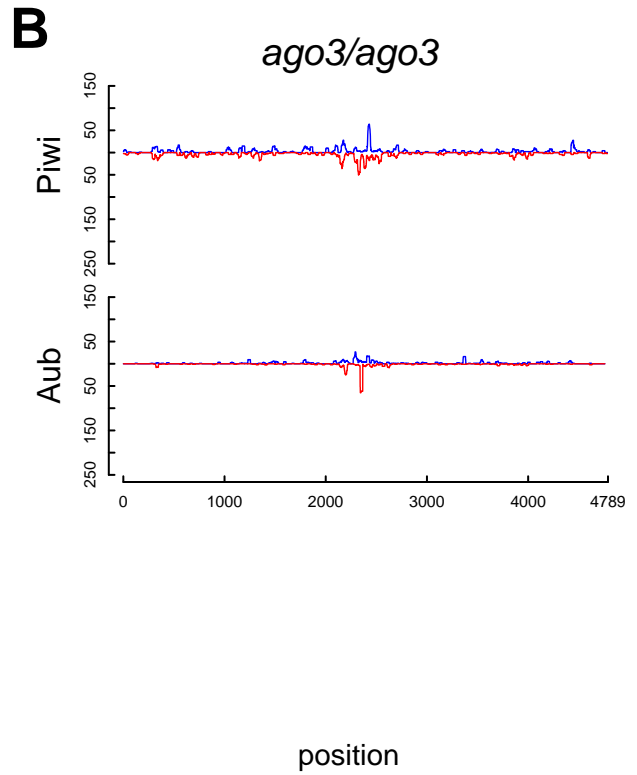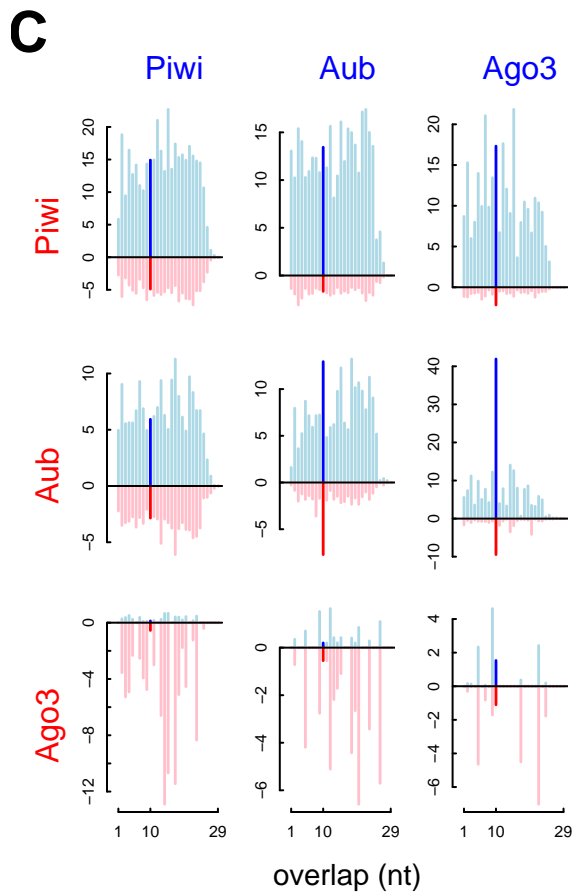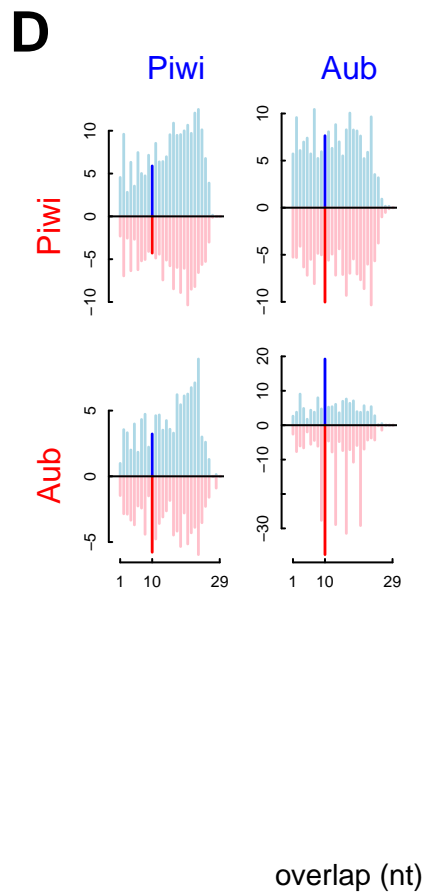

# Doc3 element

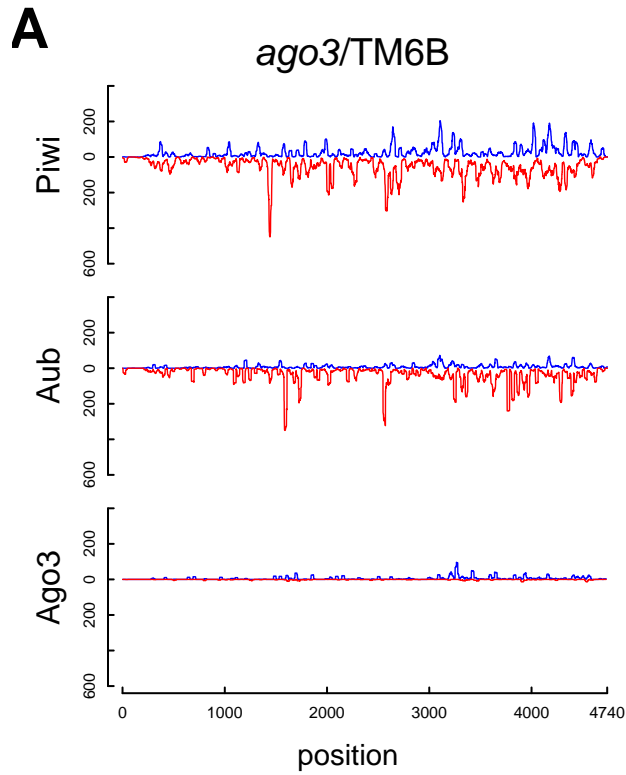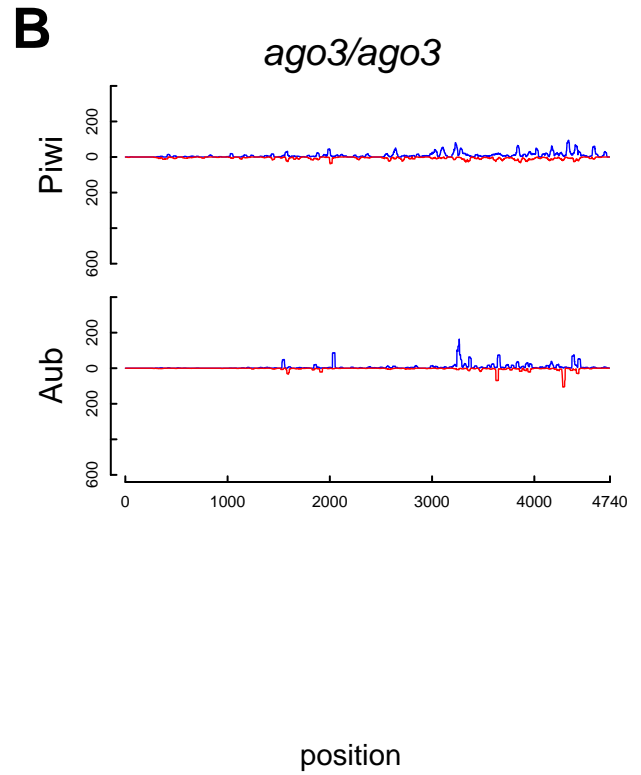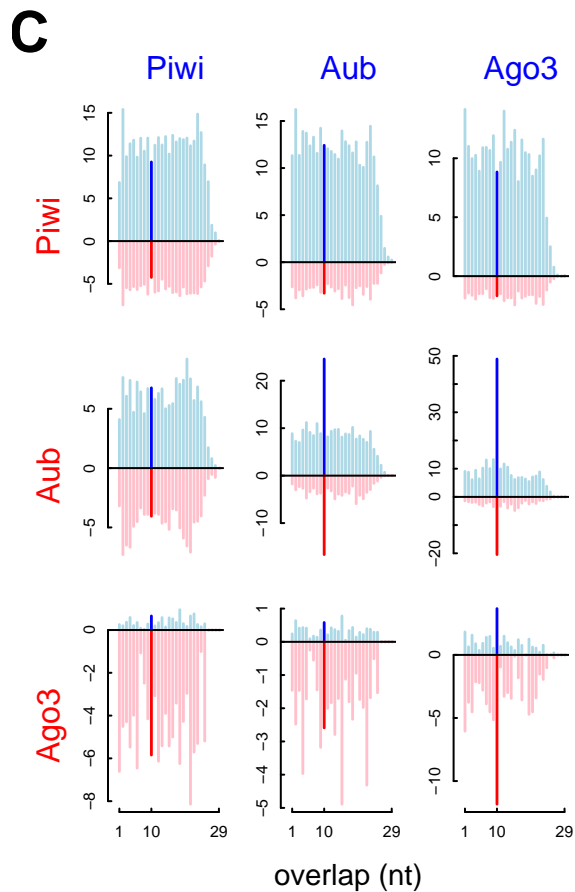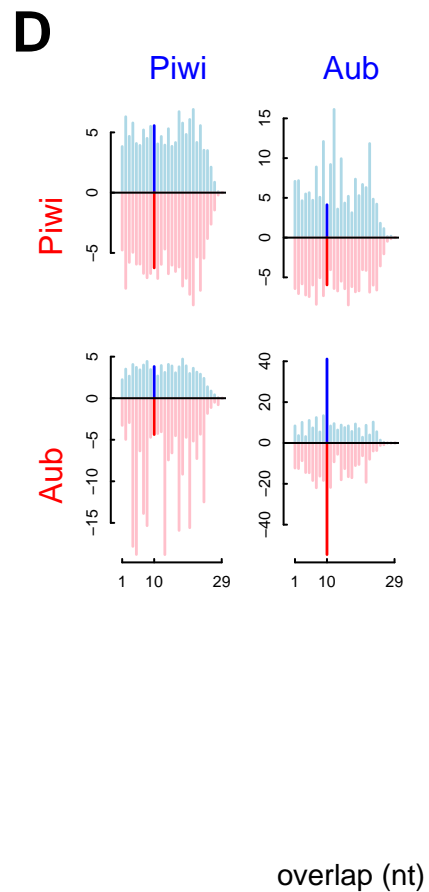

# F element

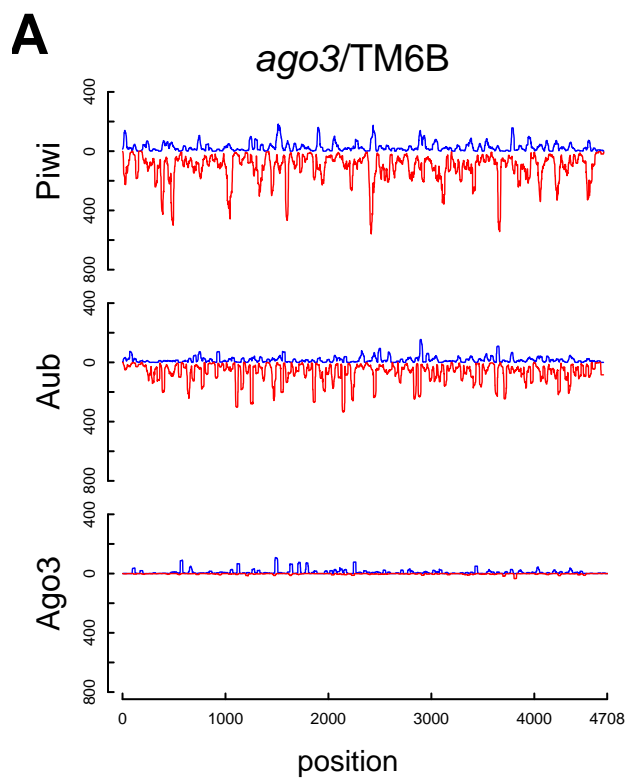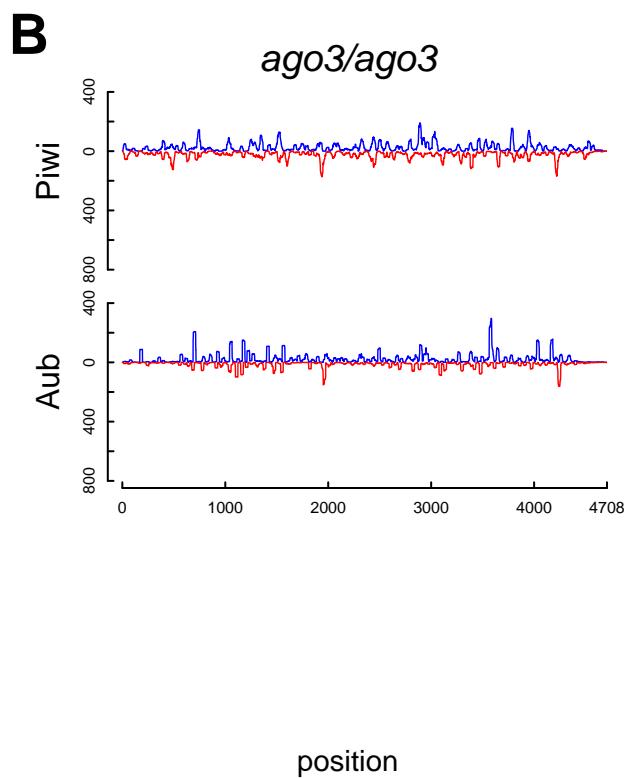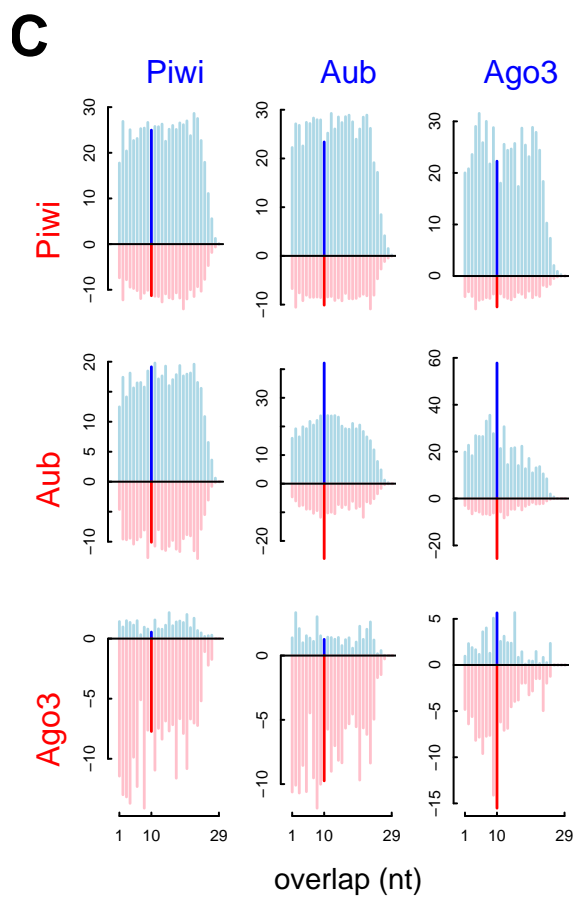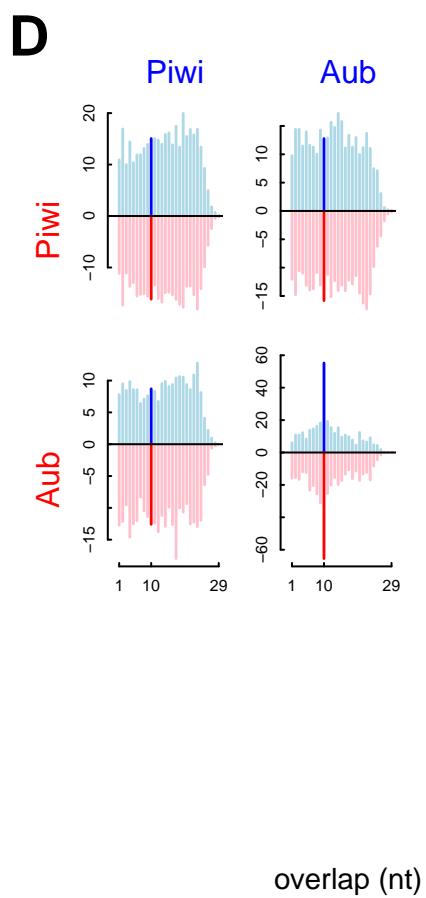

# flea

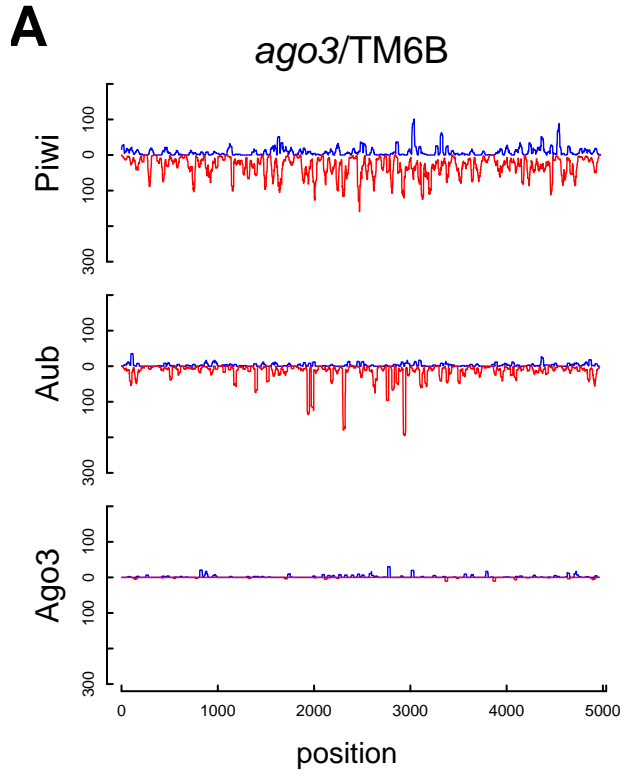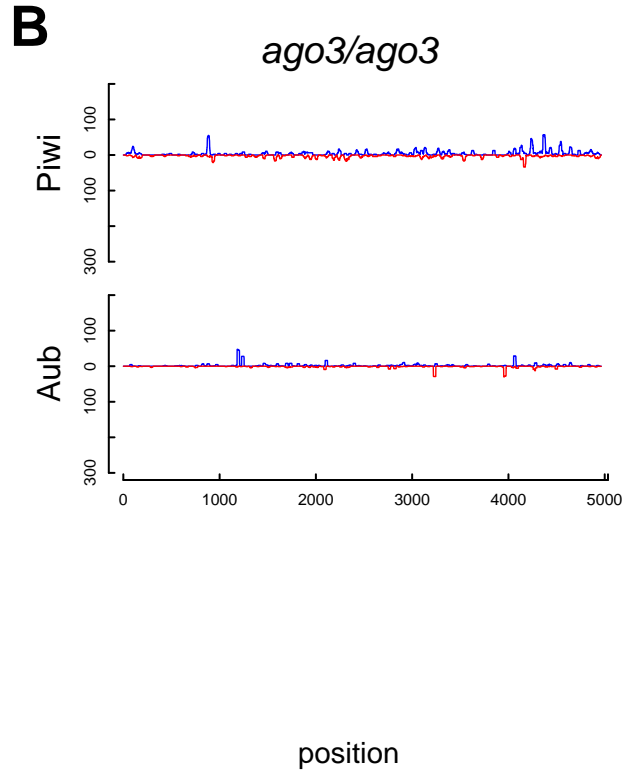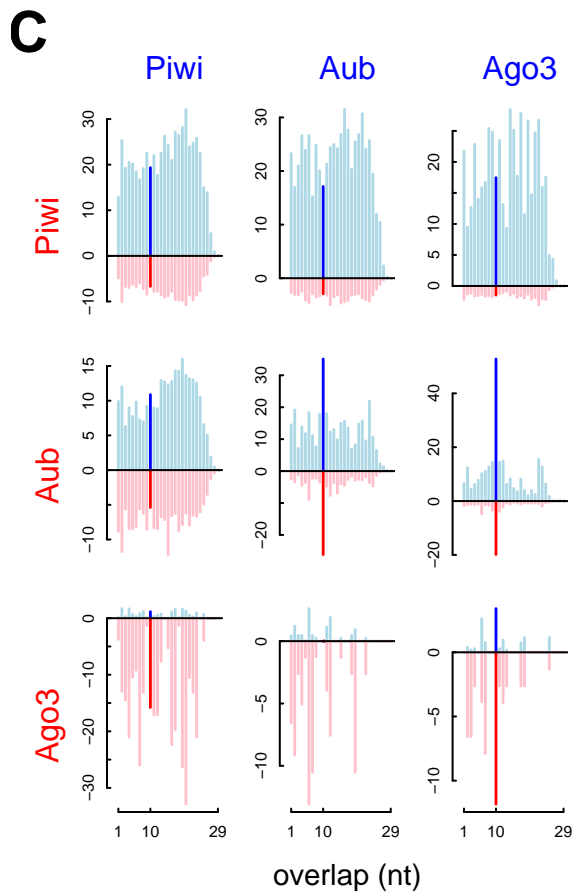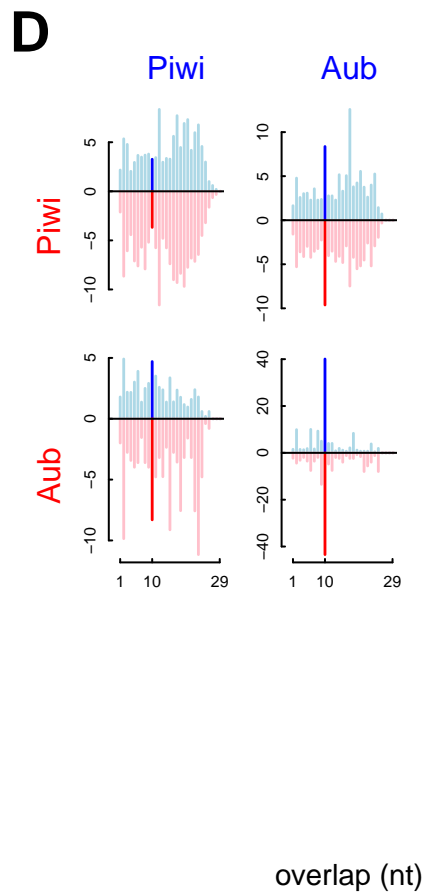

# Fw2

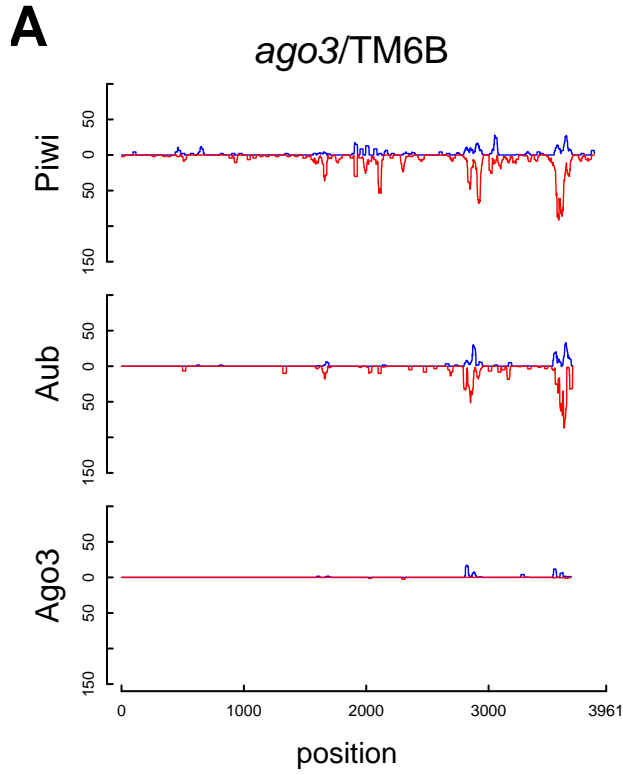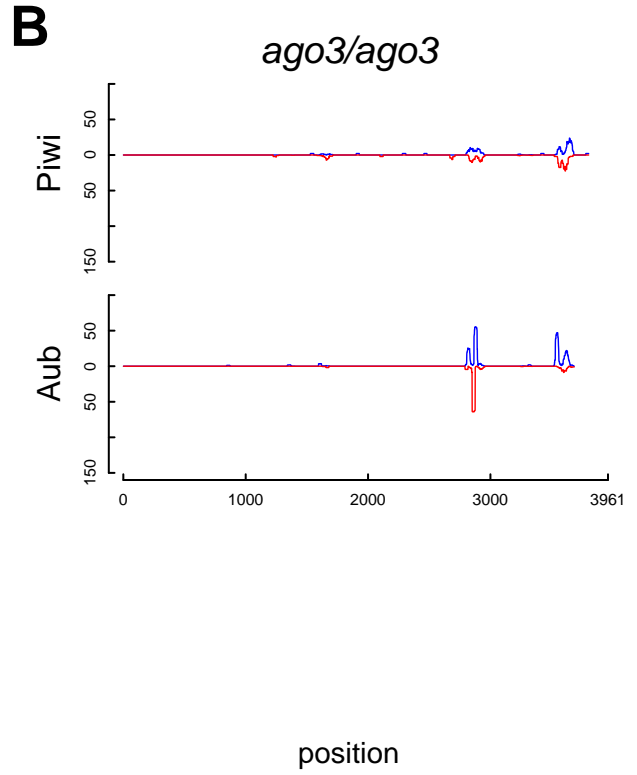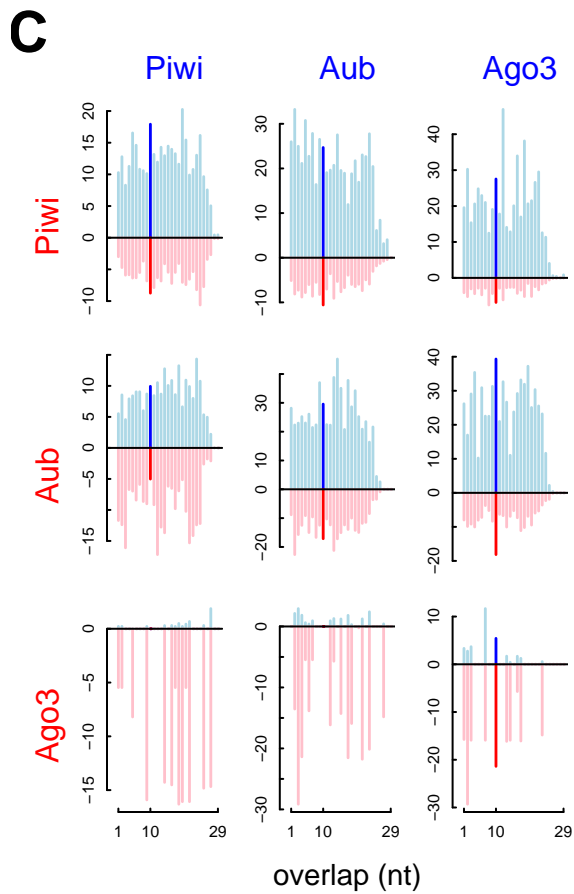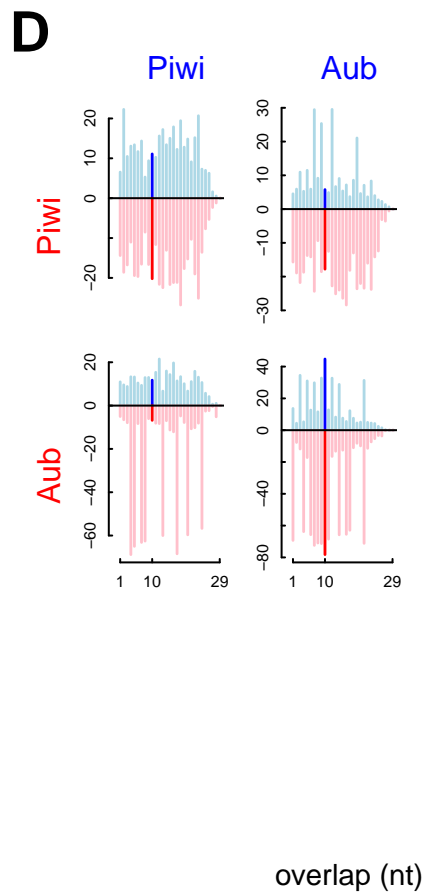



# *G* element

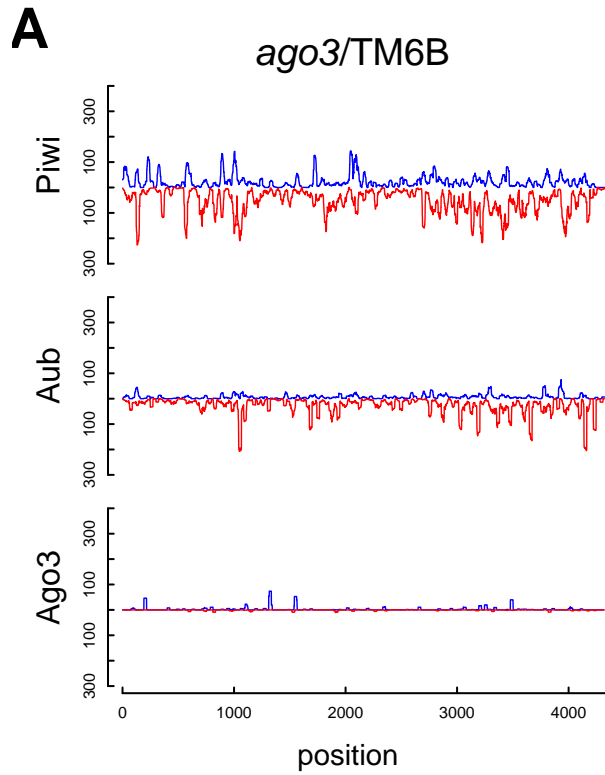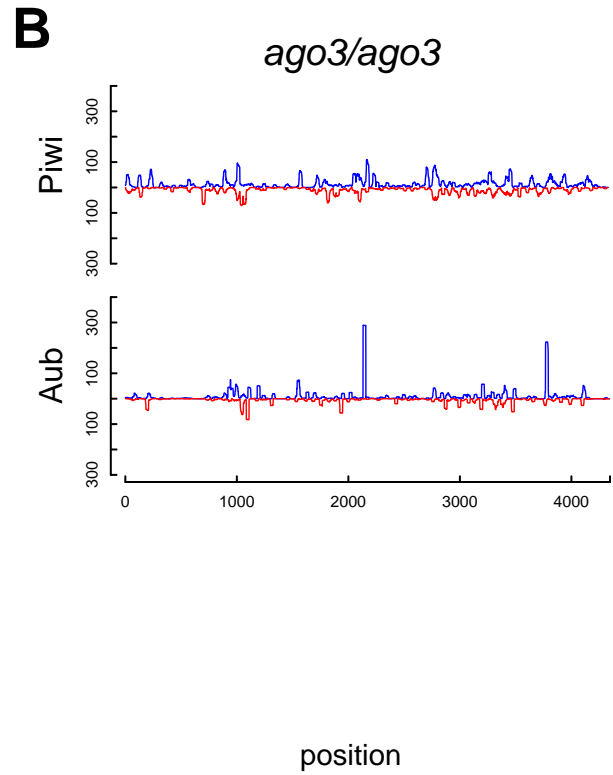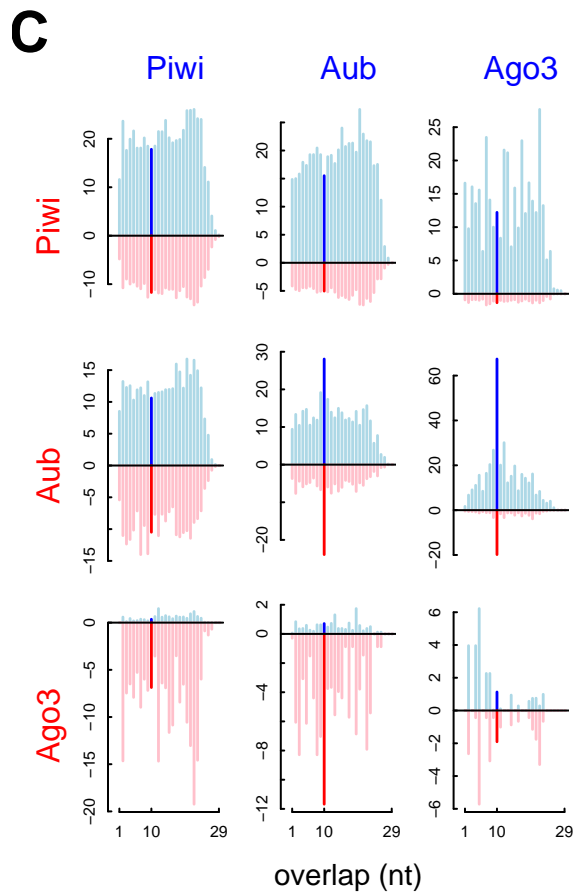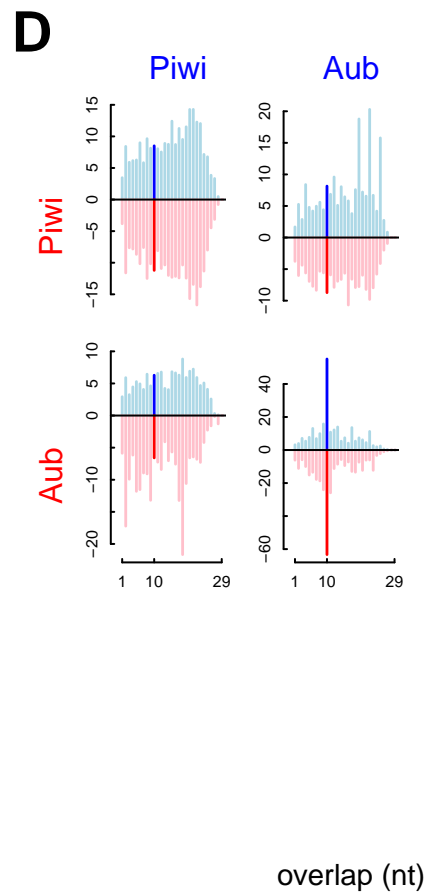

# G2

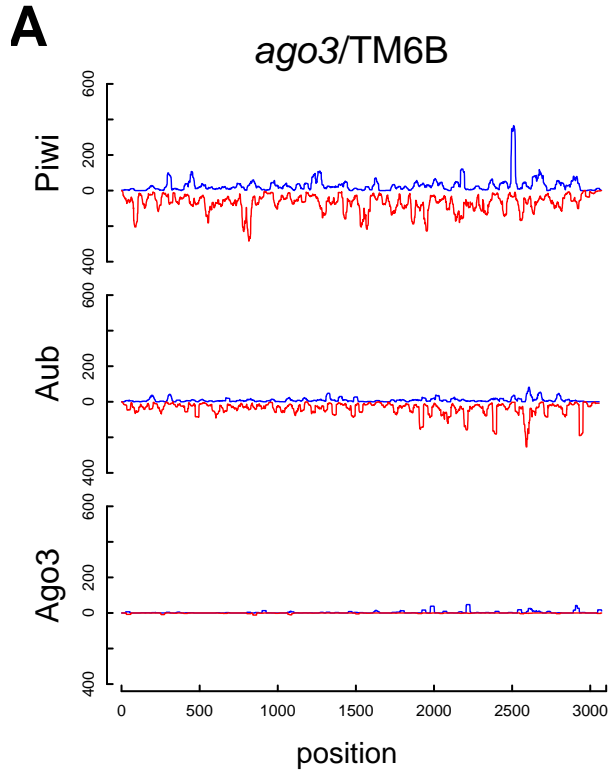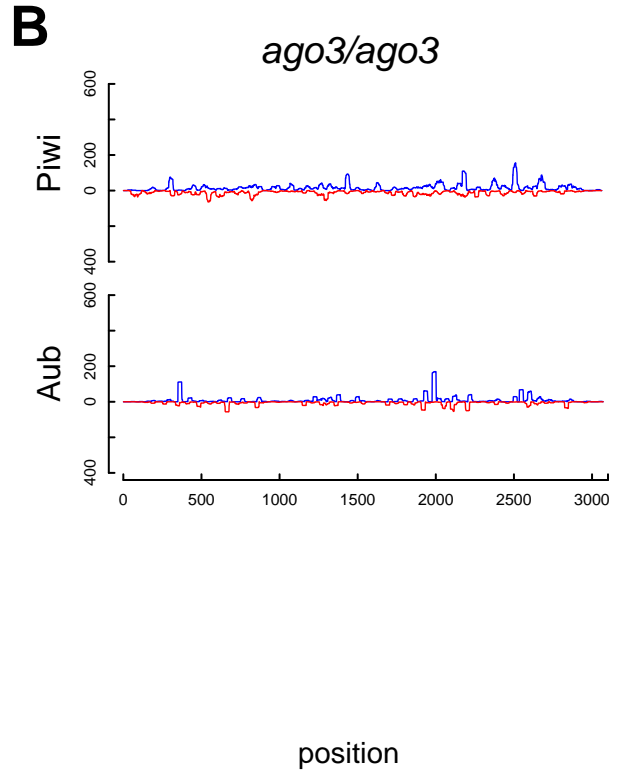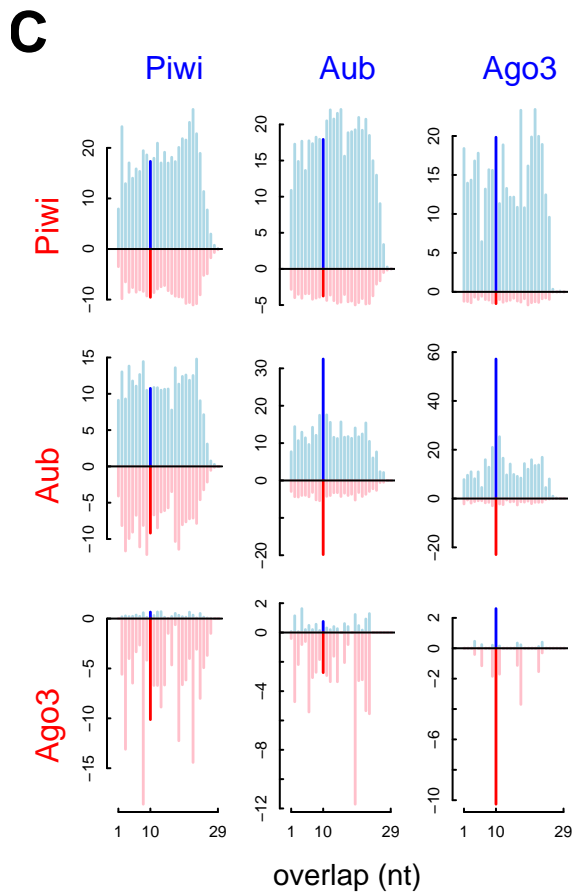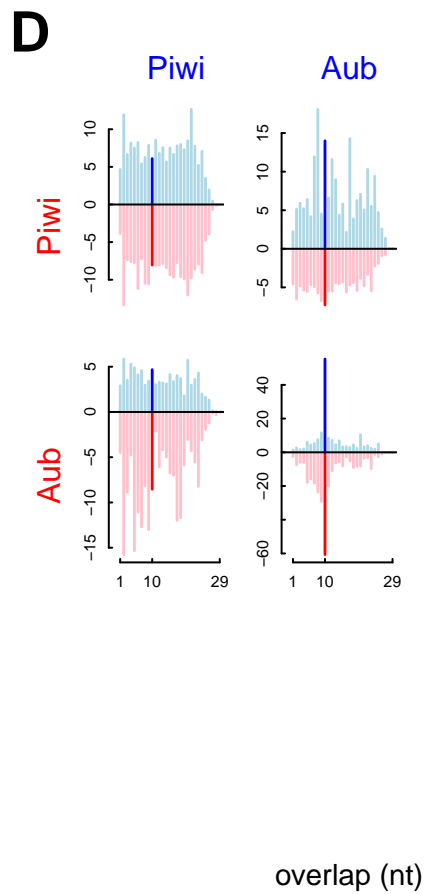

# G4

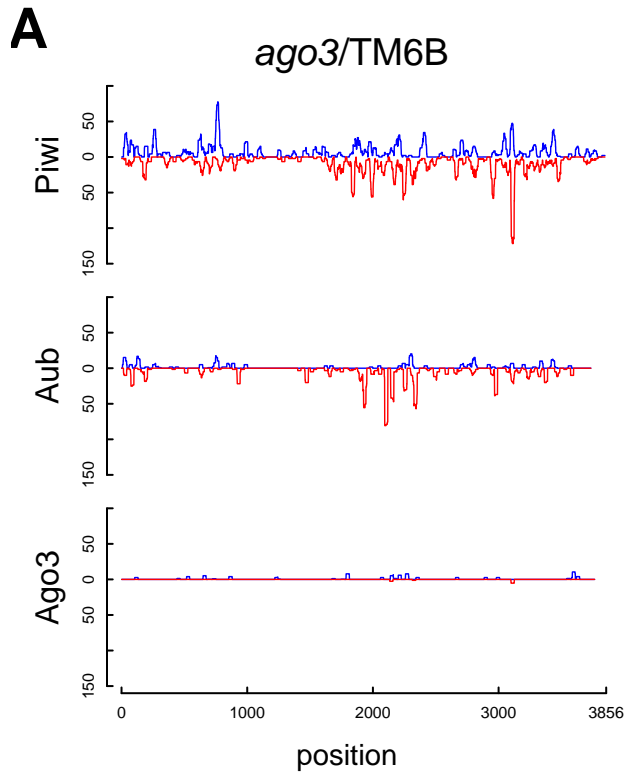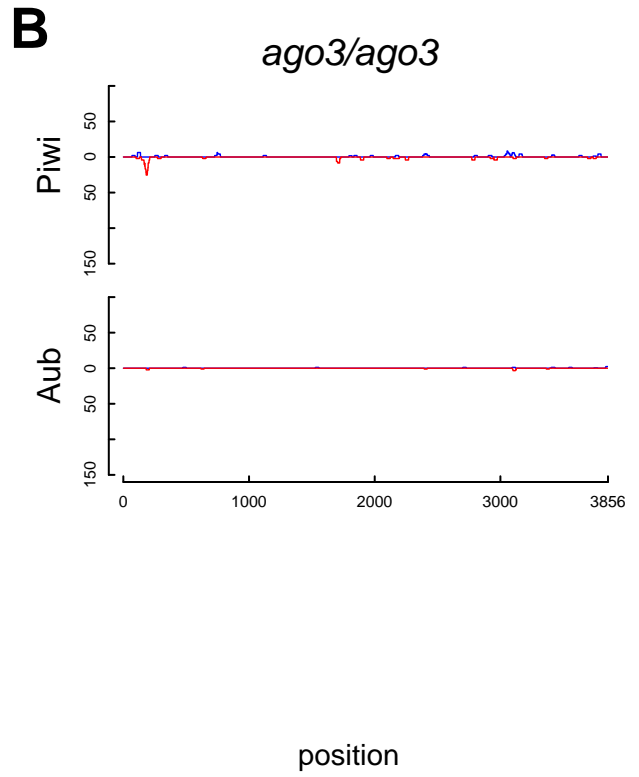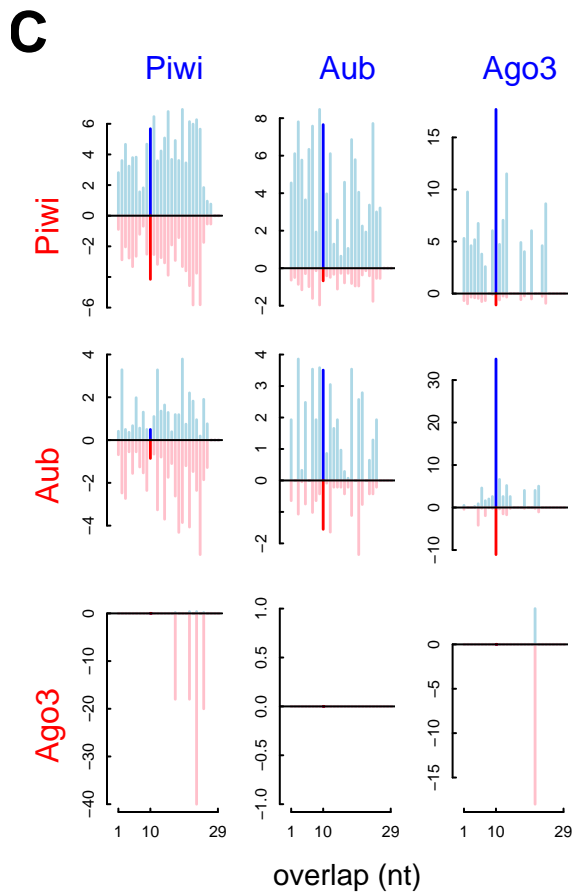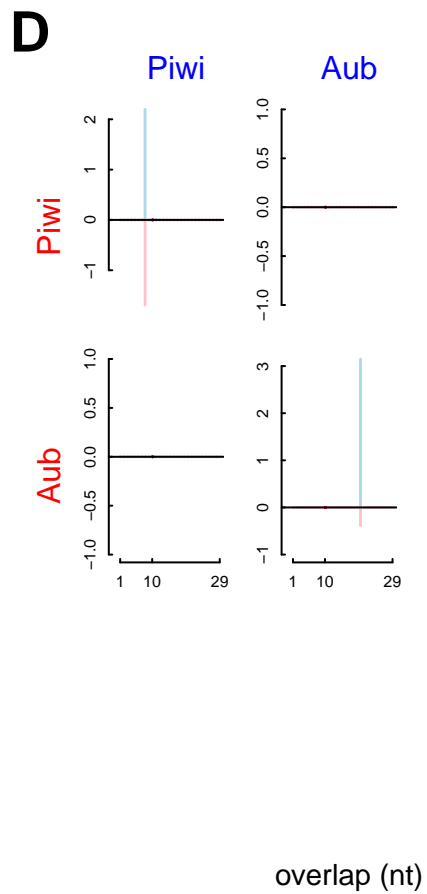

# G5

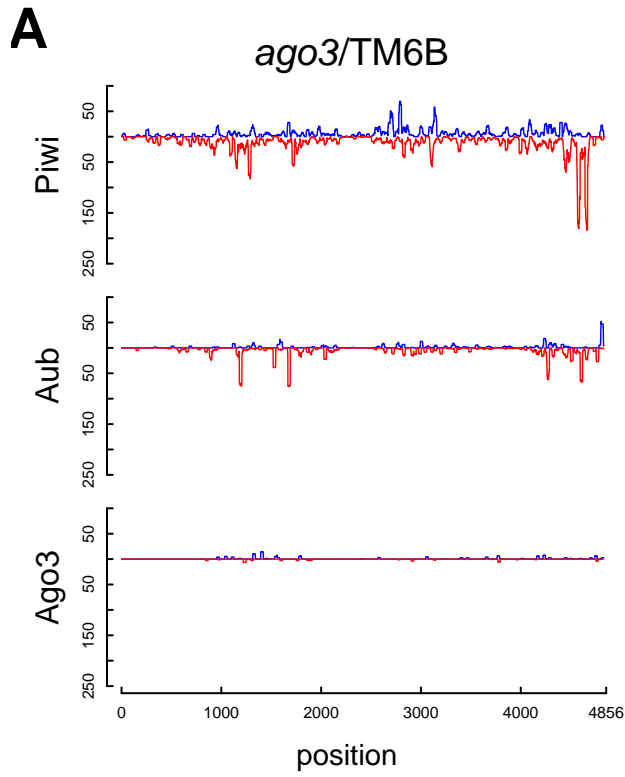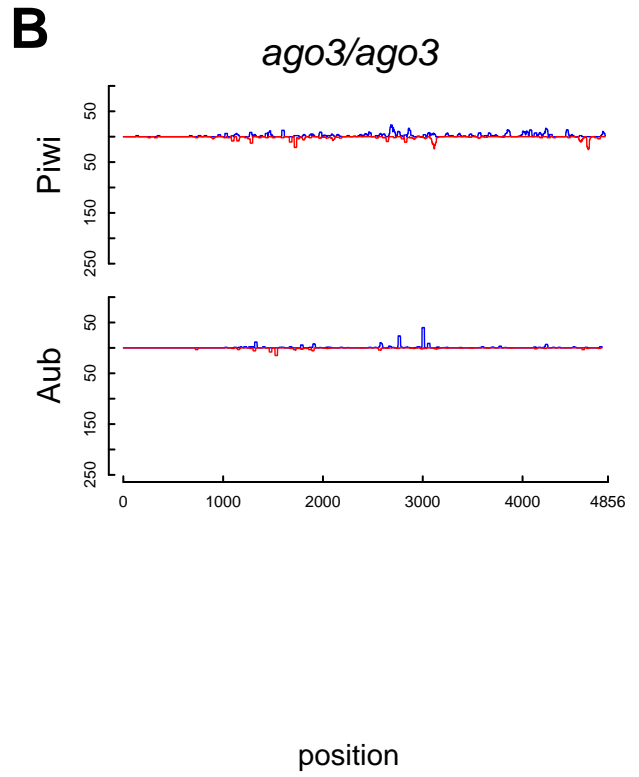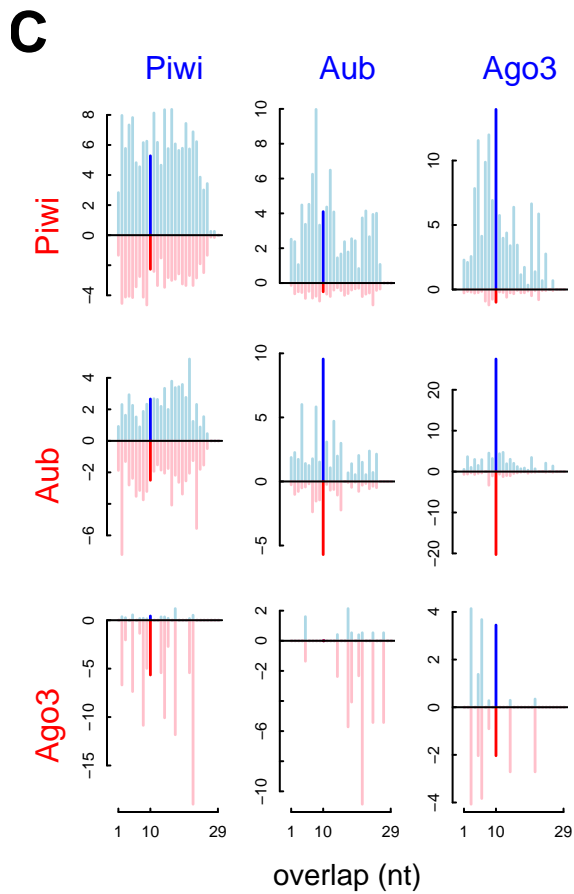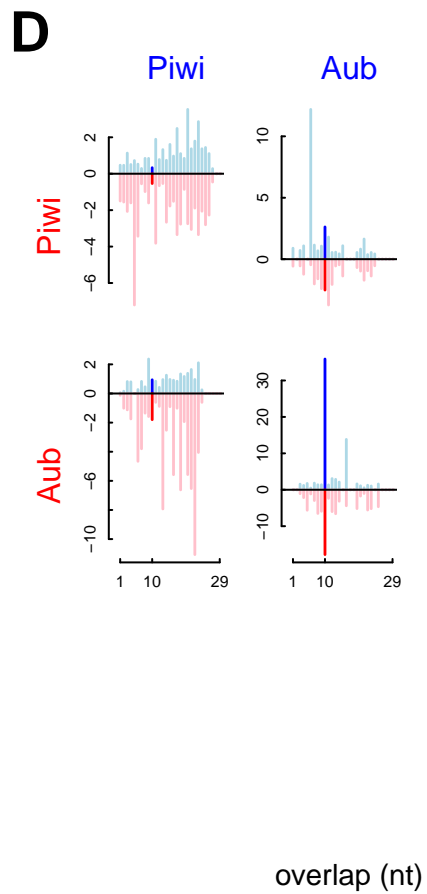

# G5A

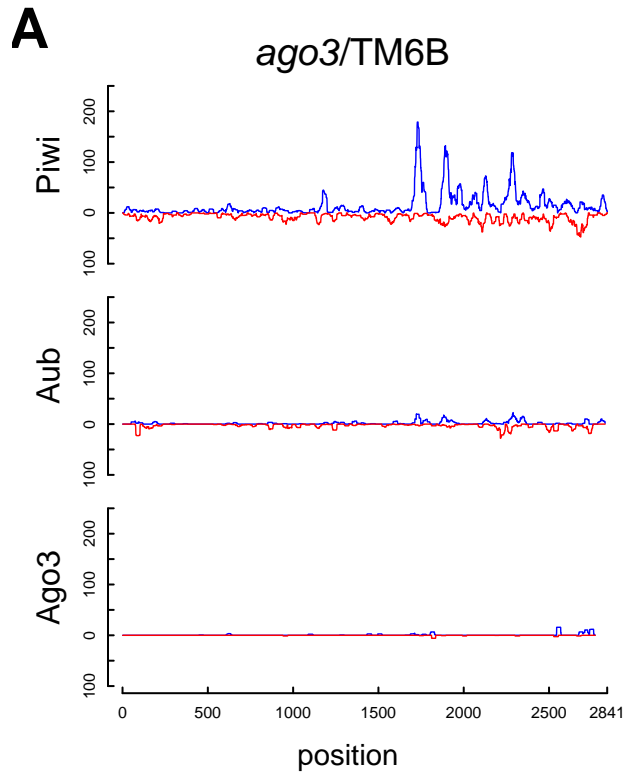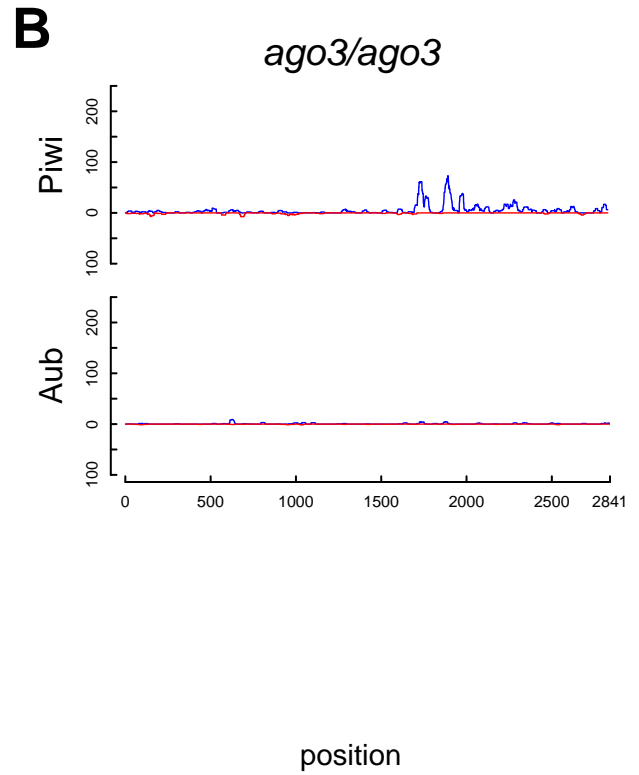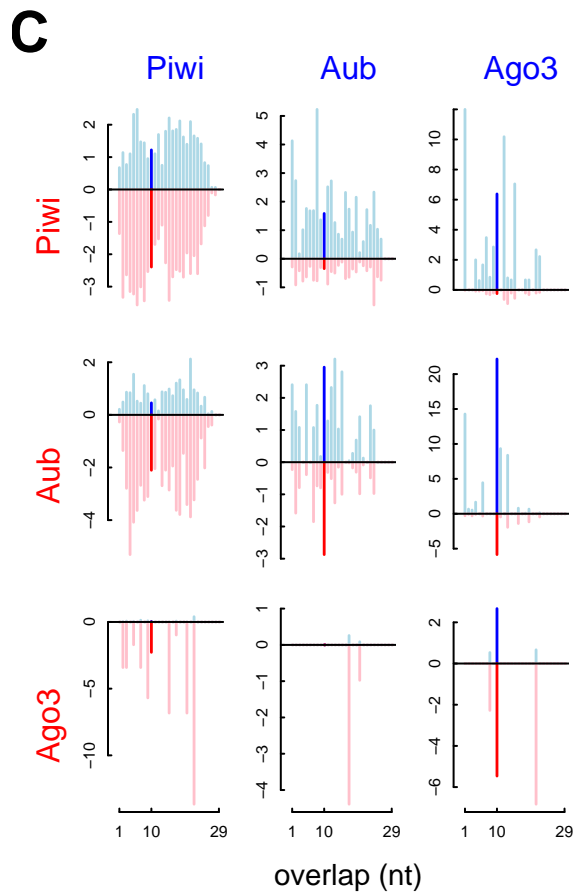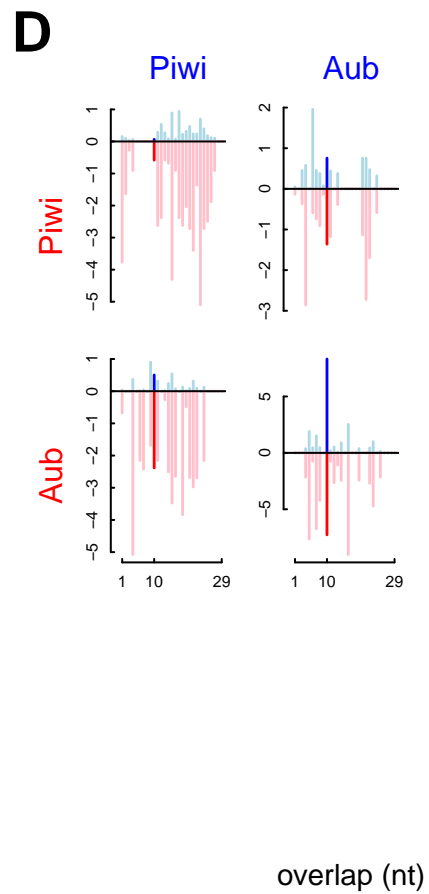

# G6

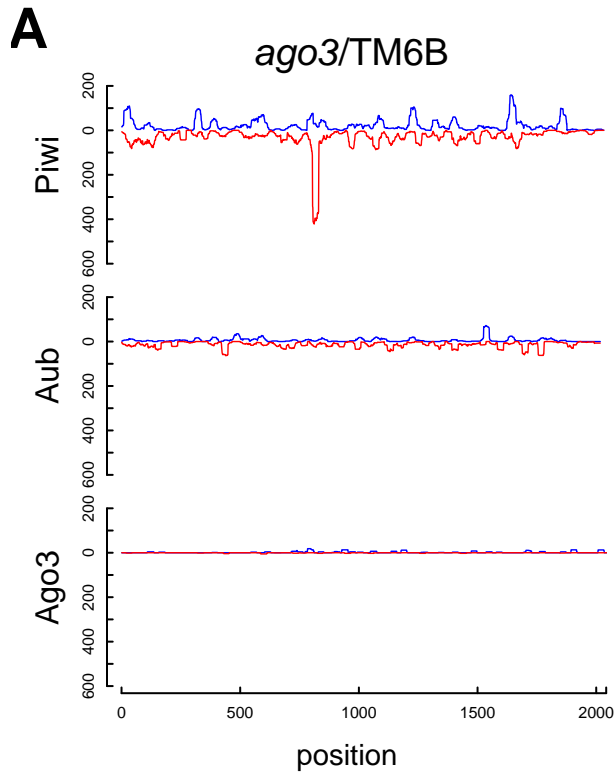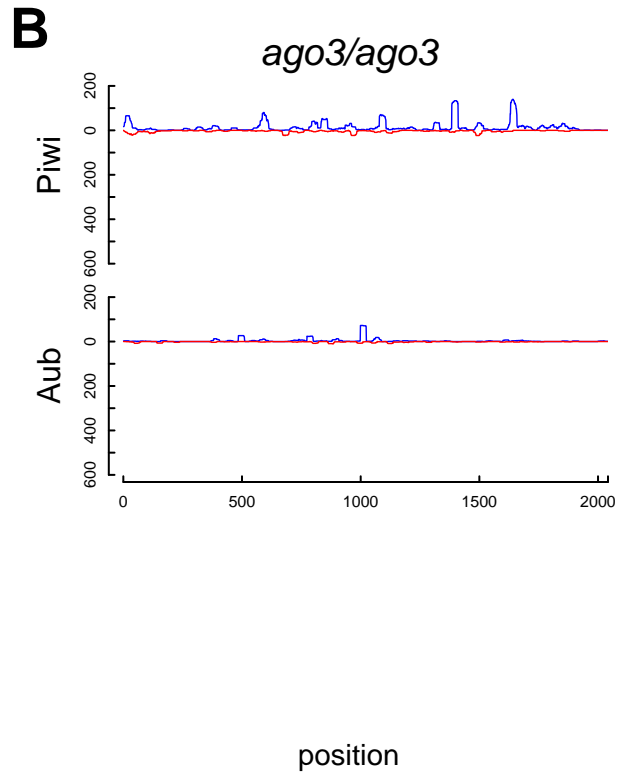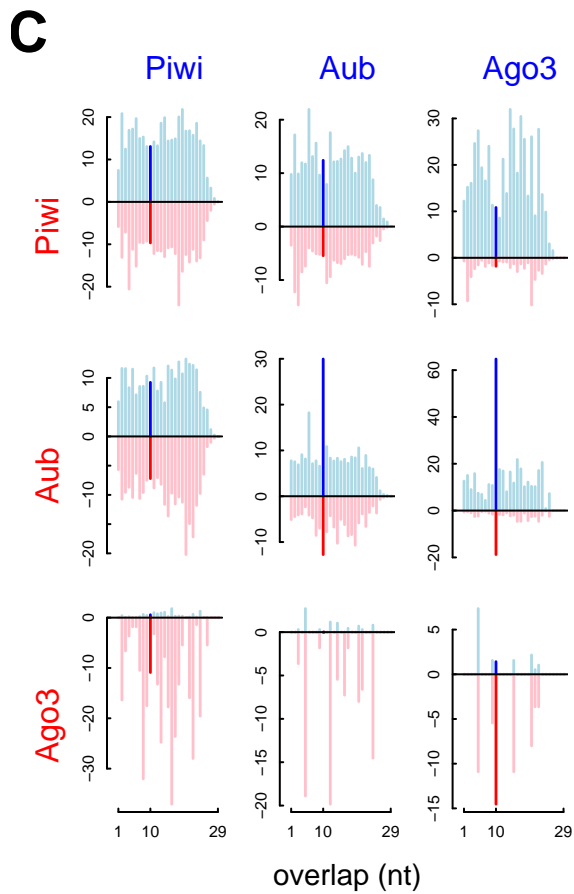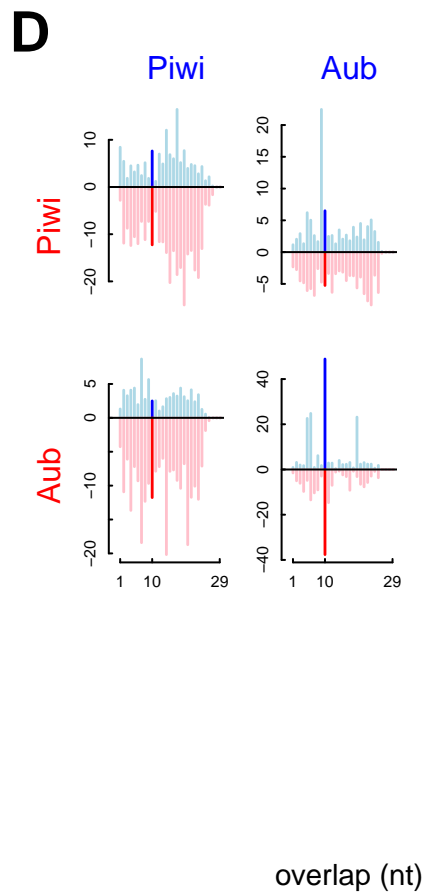

# GATE

**A**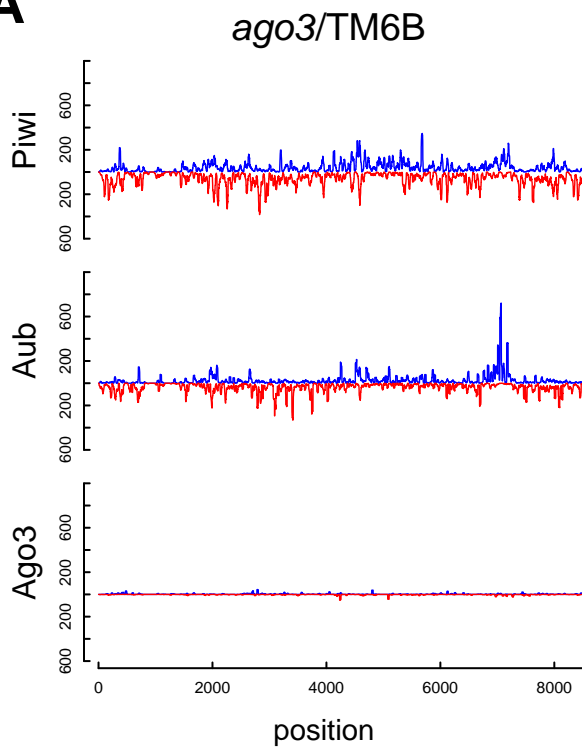**B**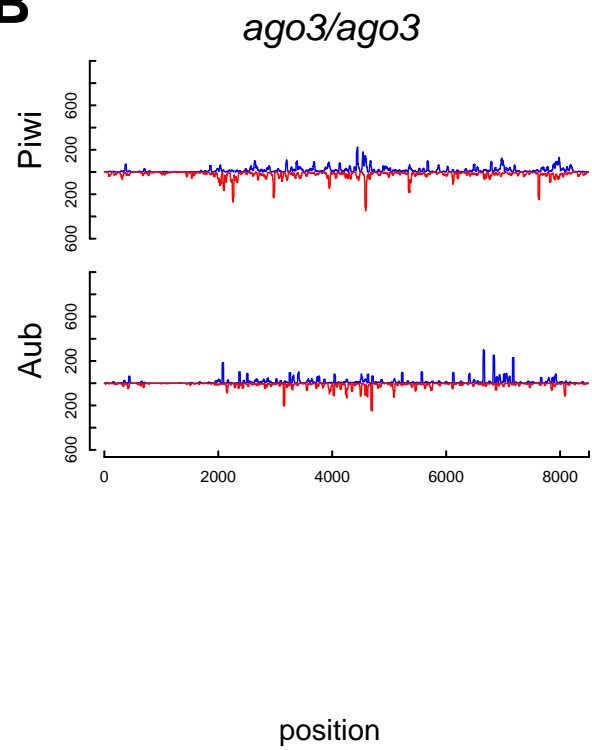**C**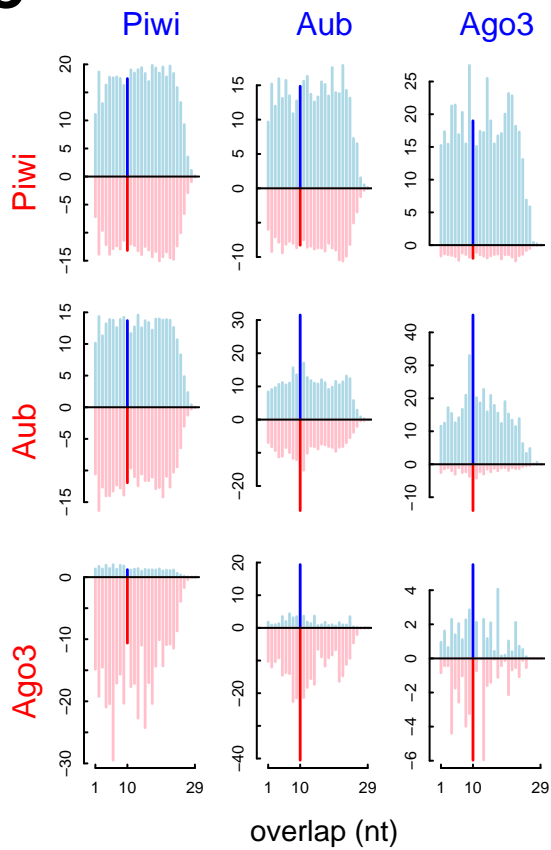**D**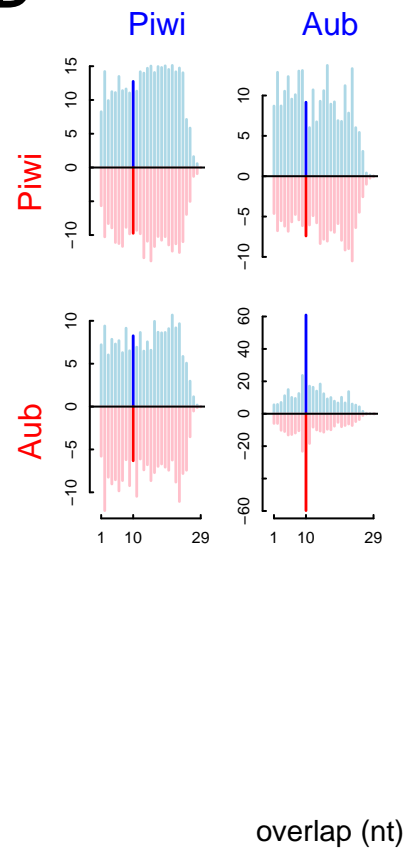

# *gtwin*

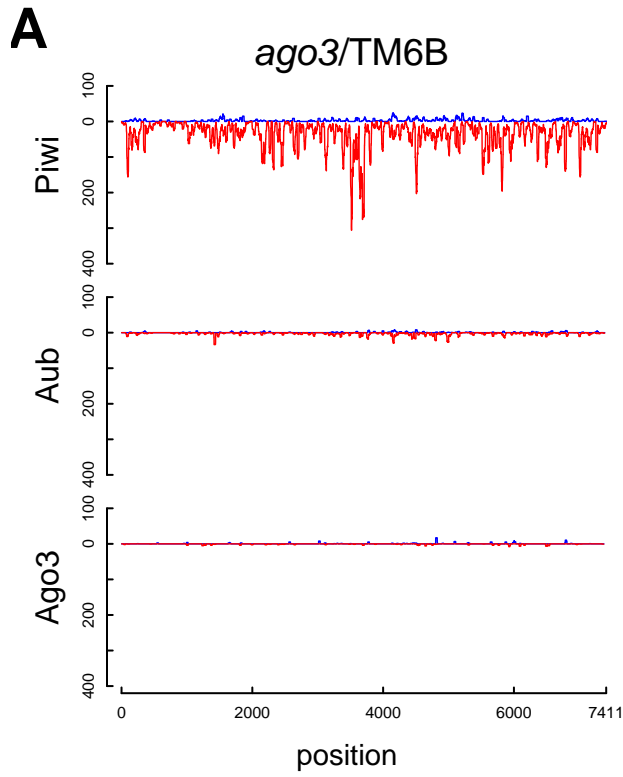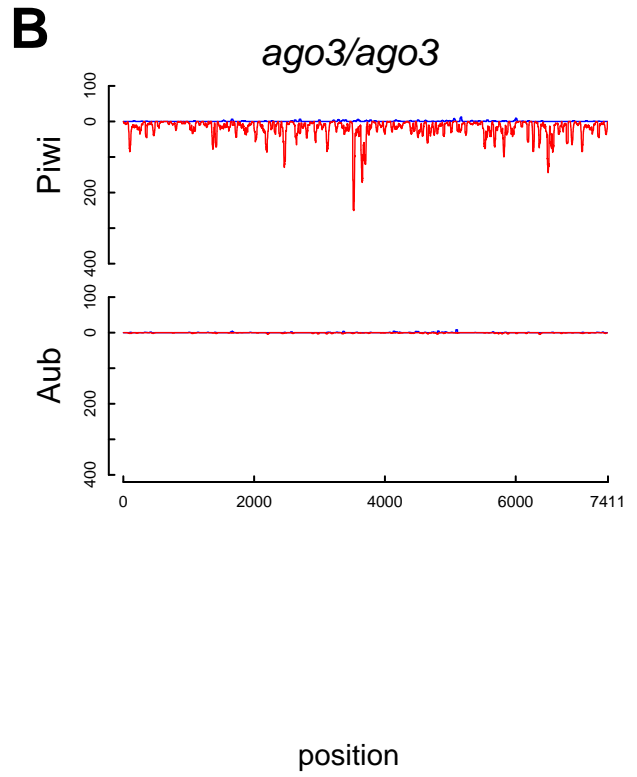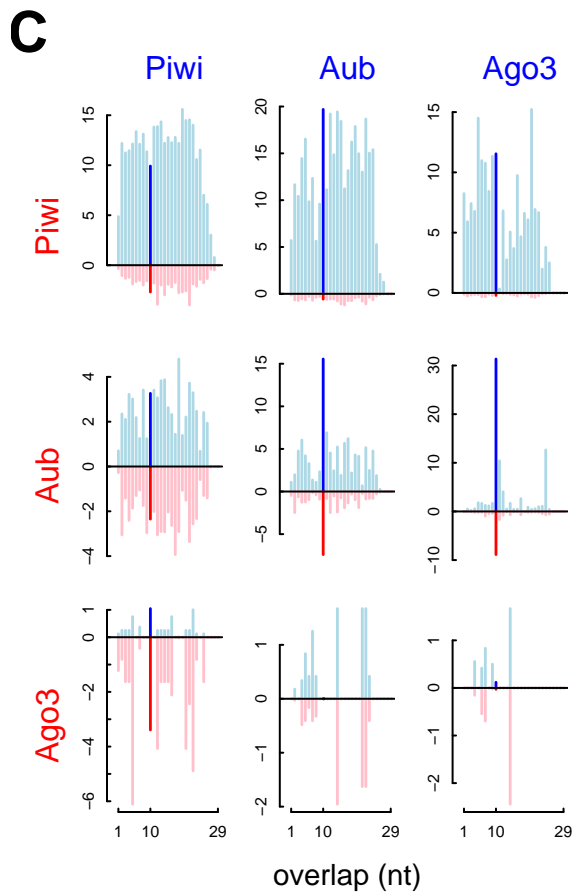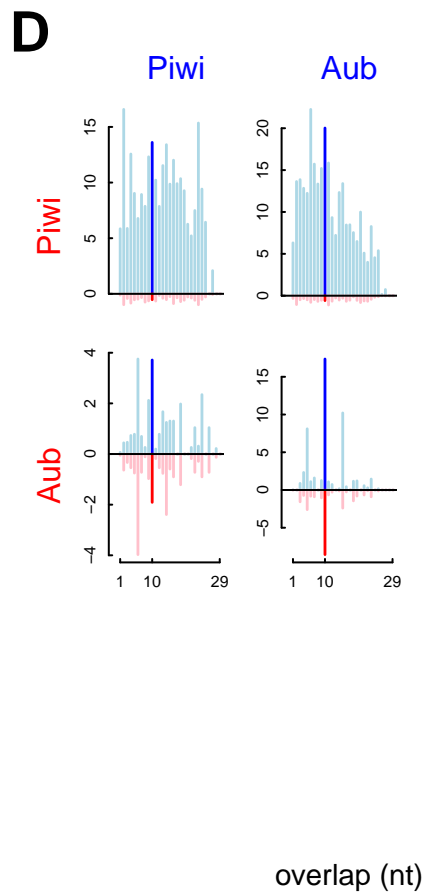



# *gypsy*

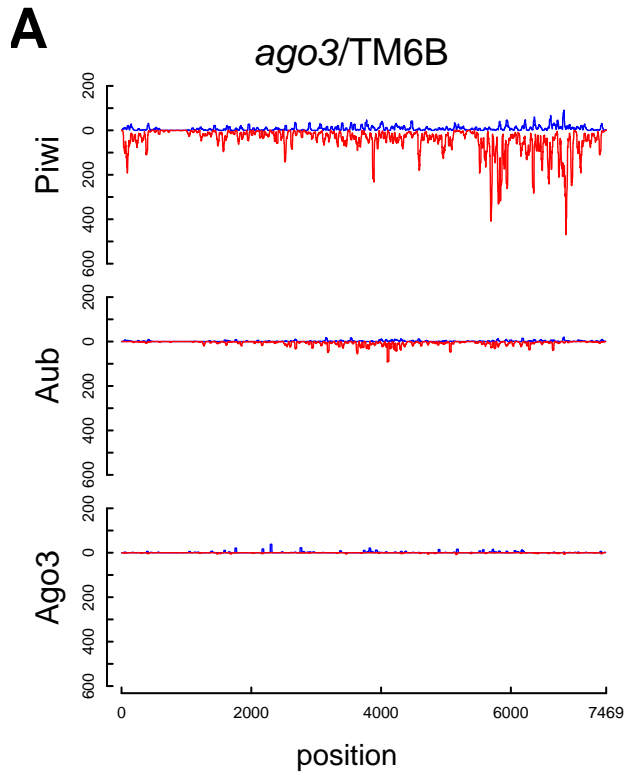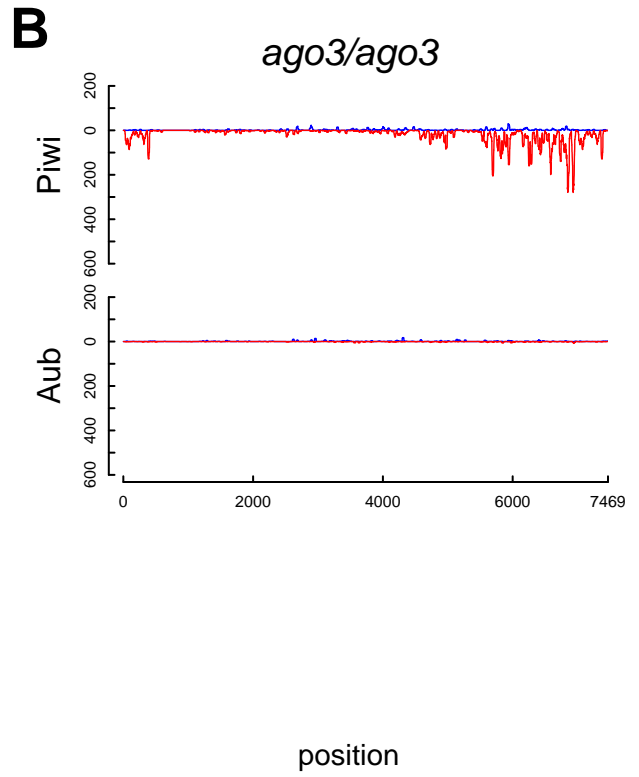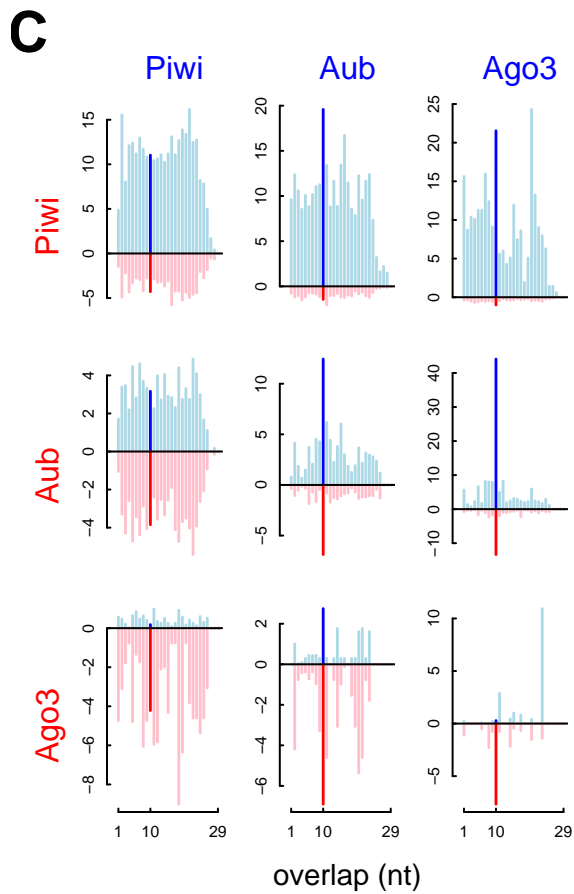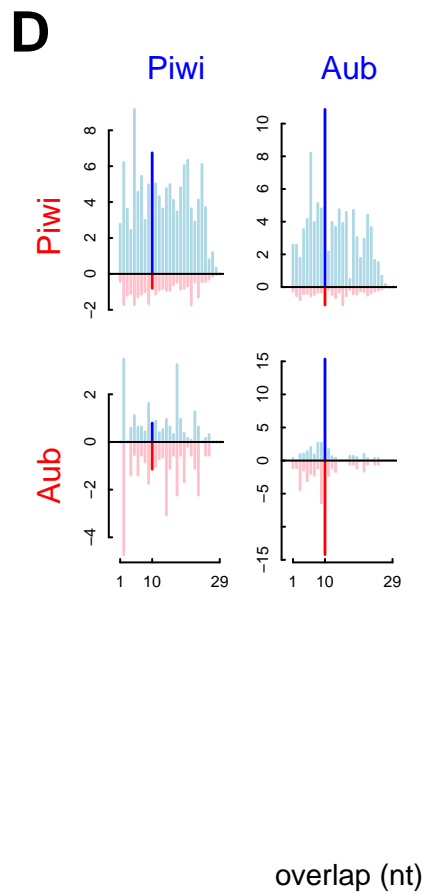

# *gypsy2*

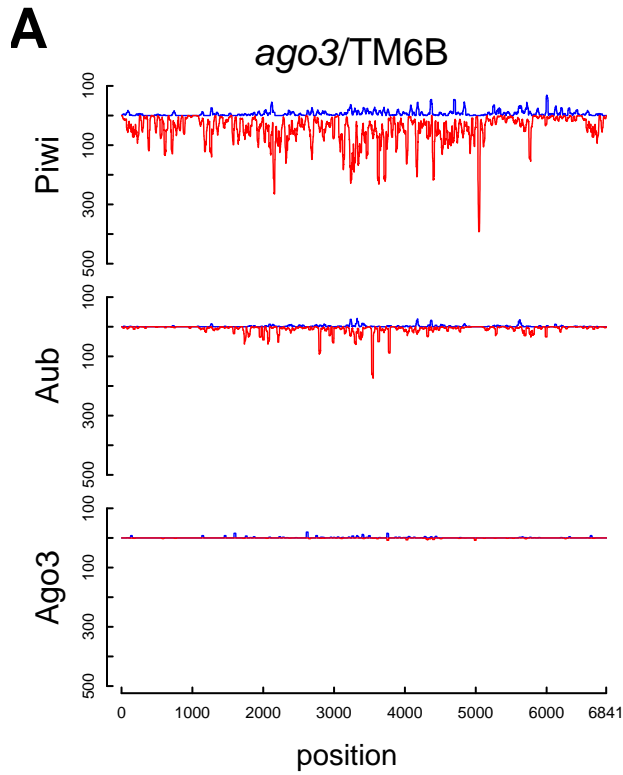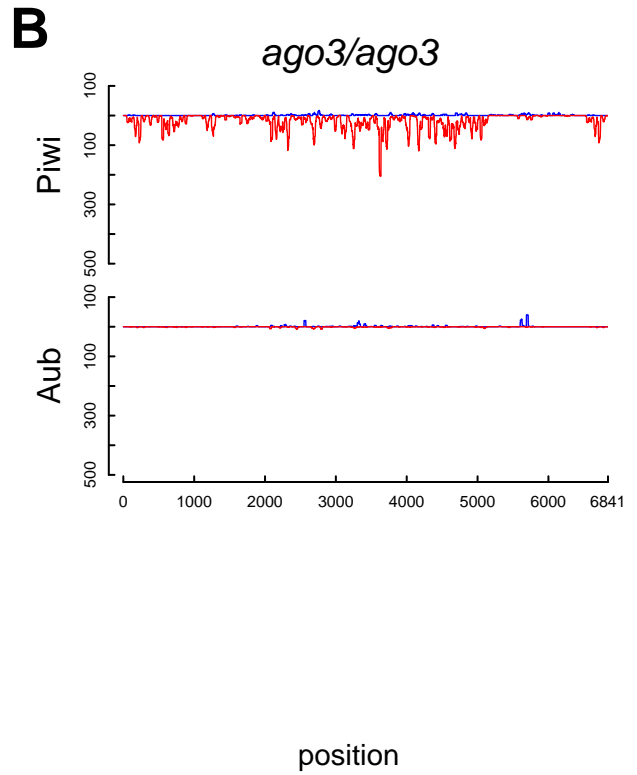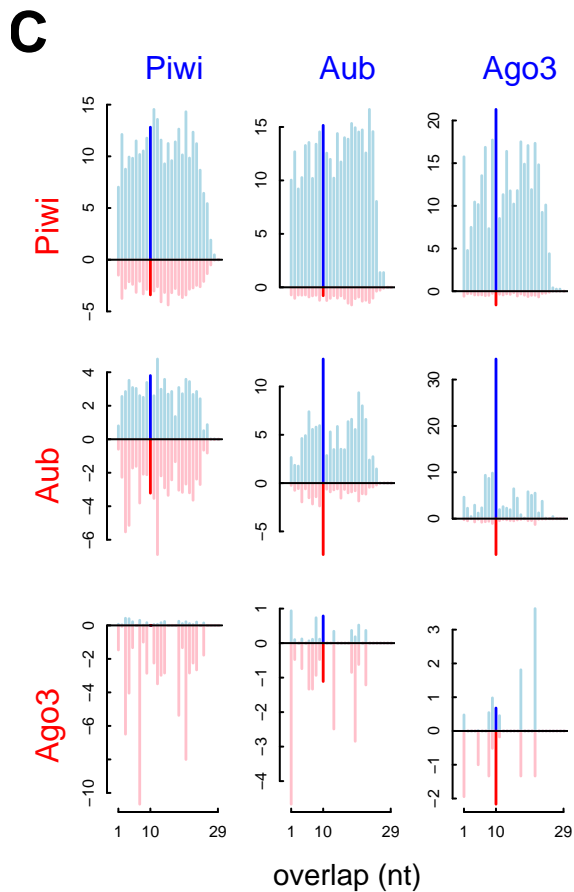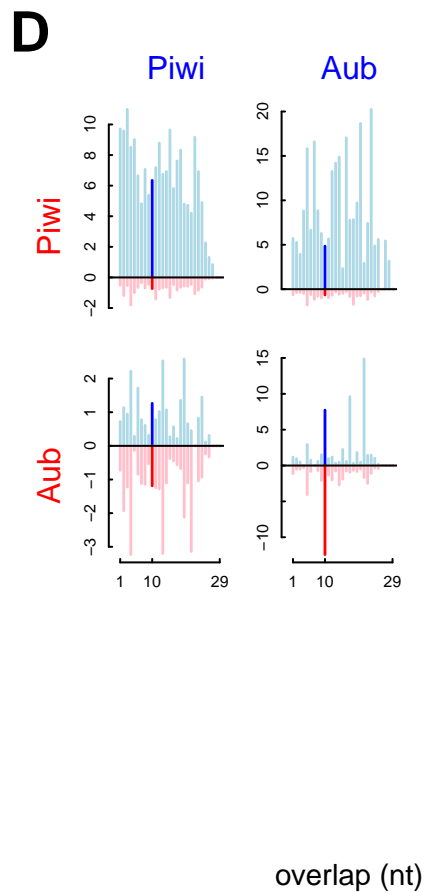

# *gypsy3*

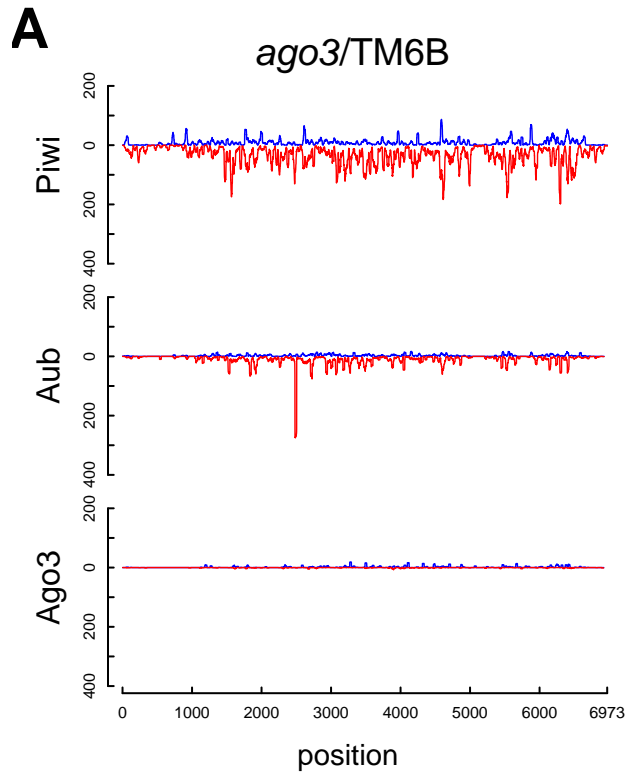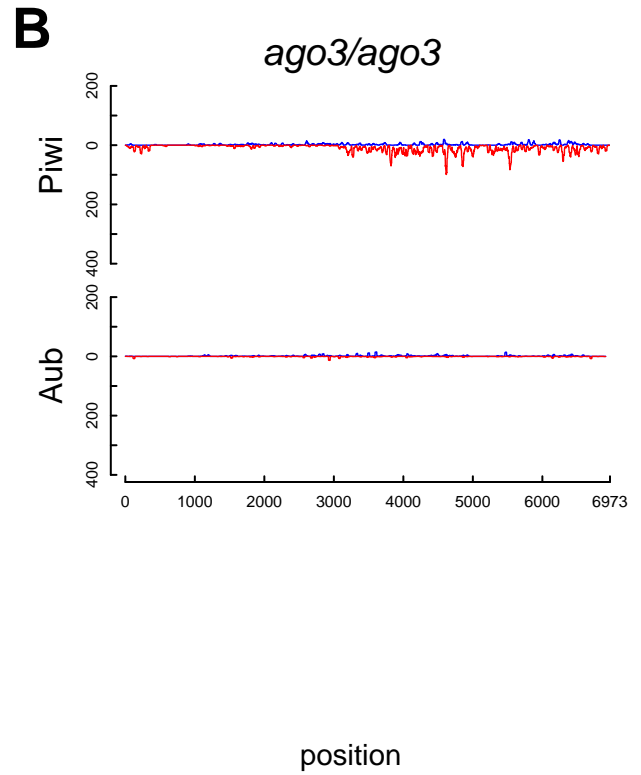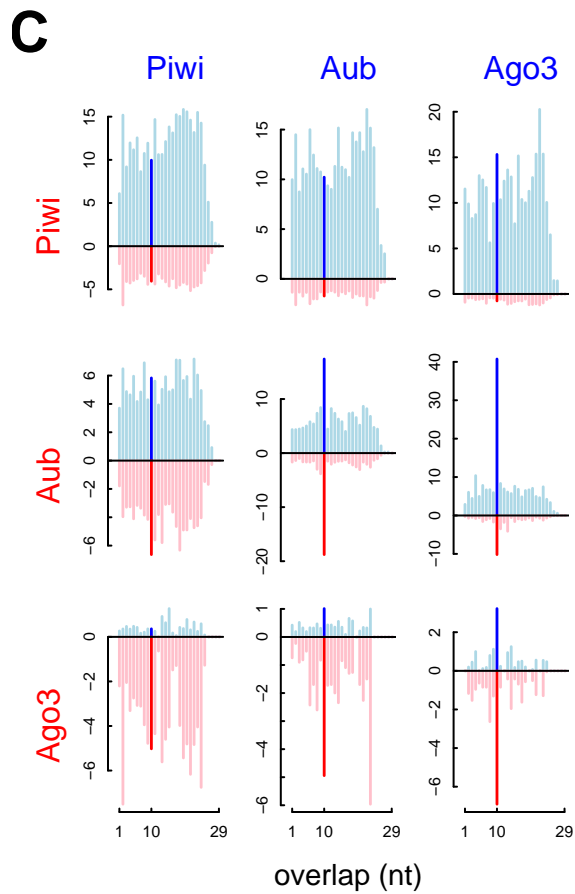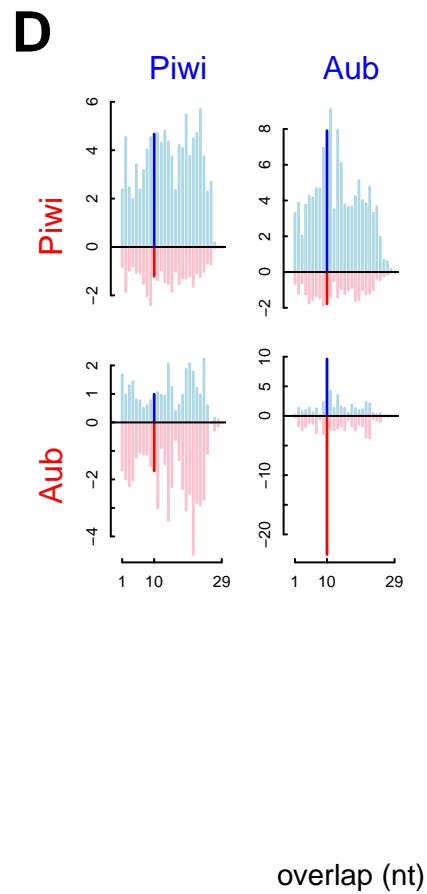

# *gypsy4*

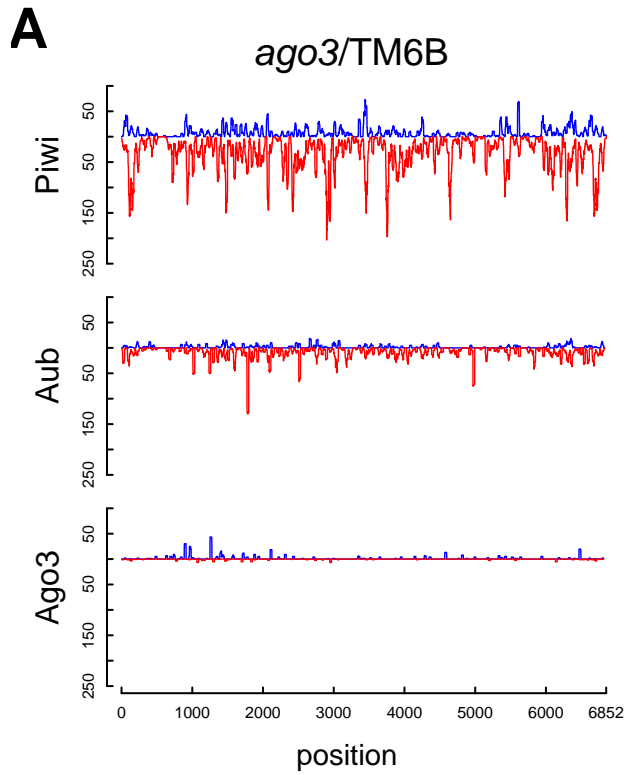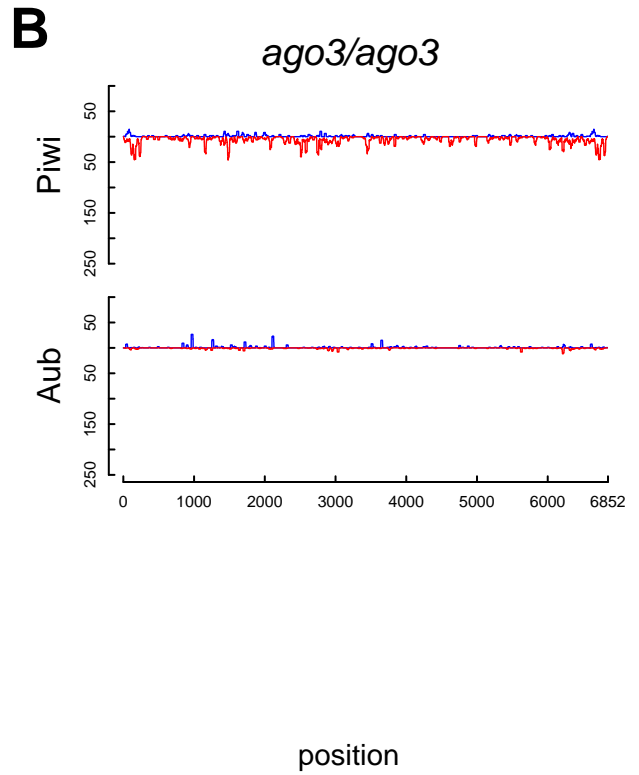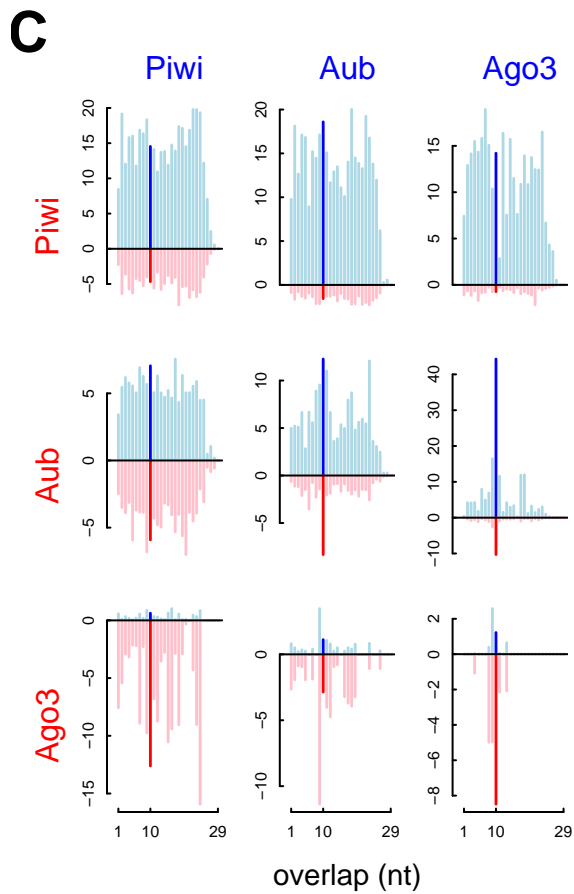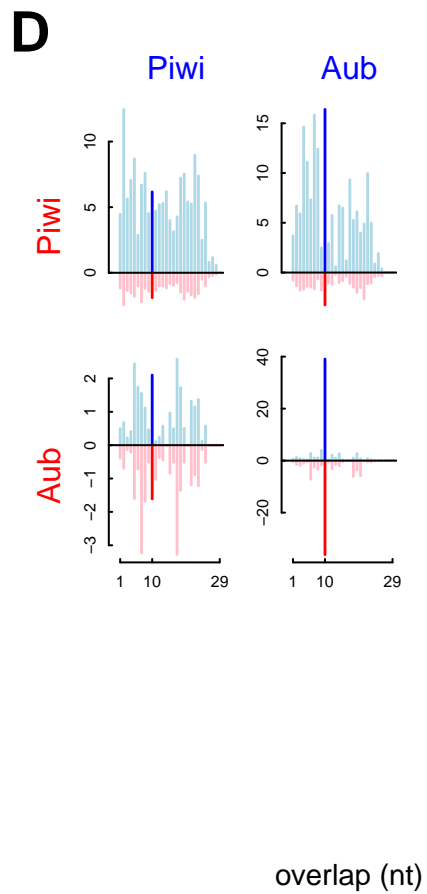

# *gypsy5*

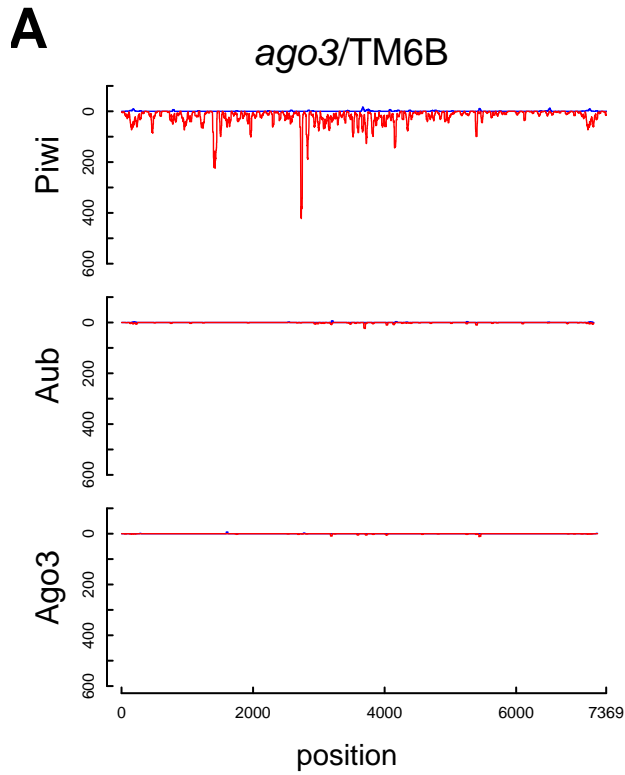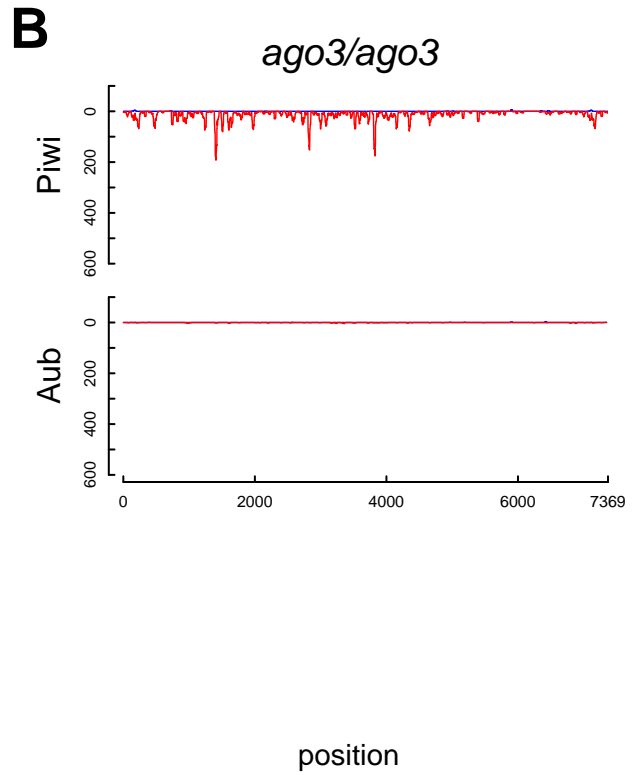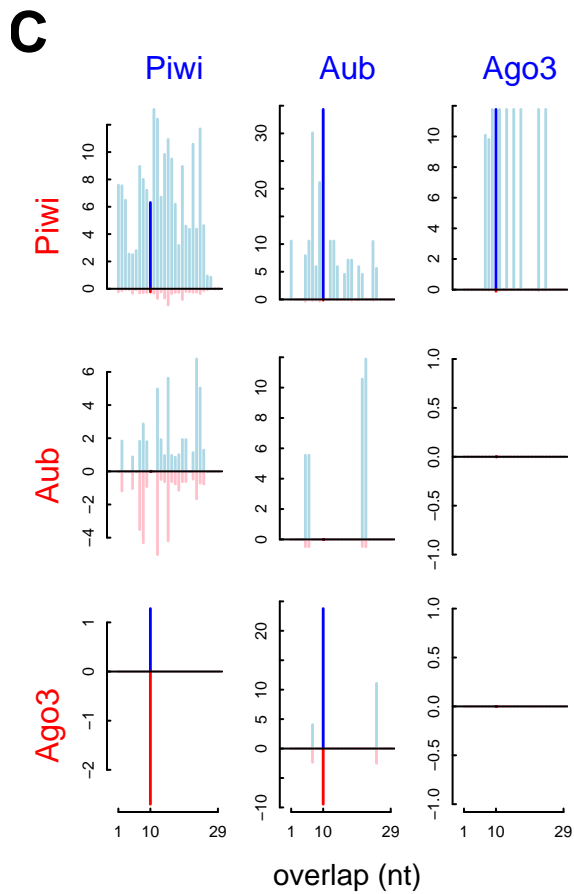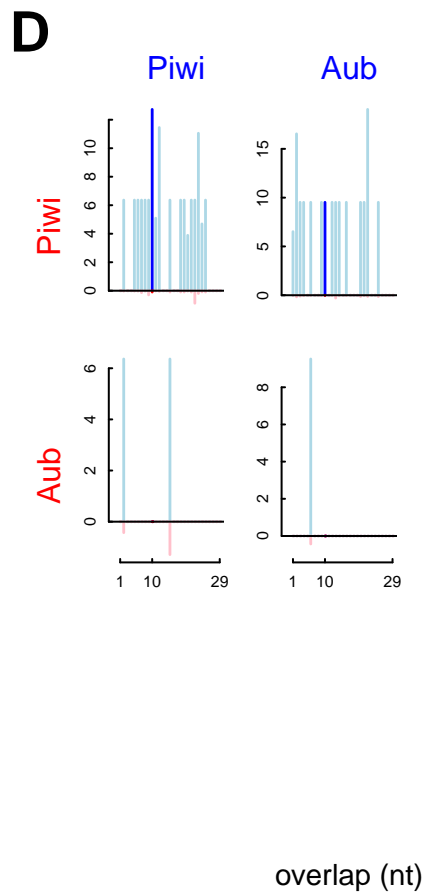

# *gypsy6*

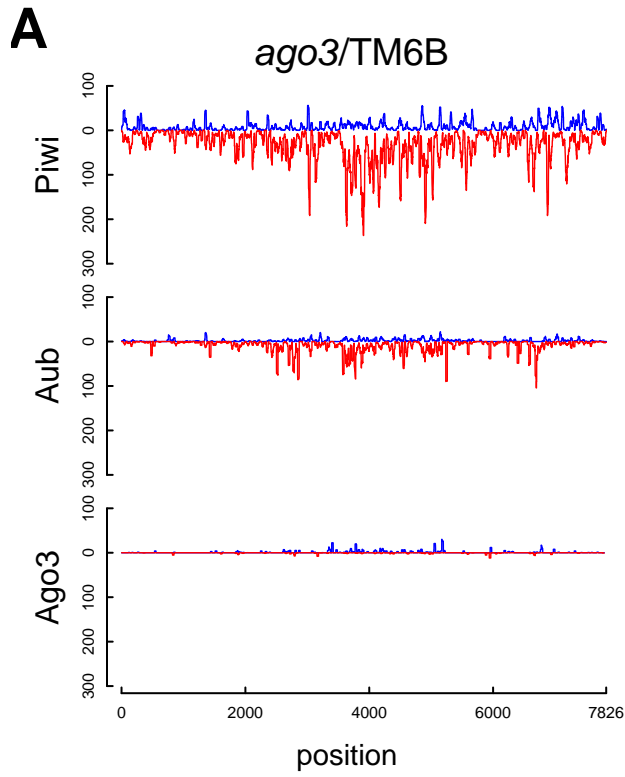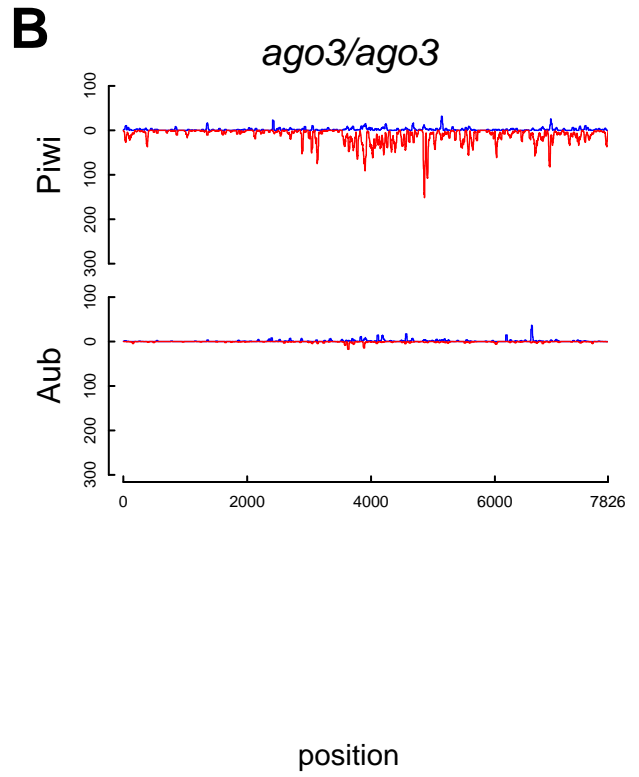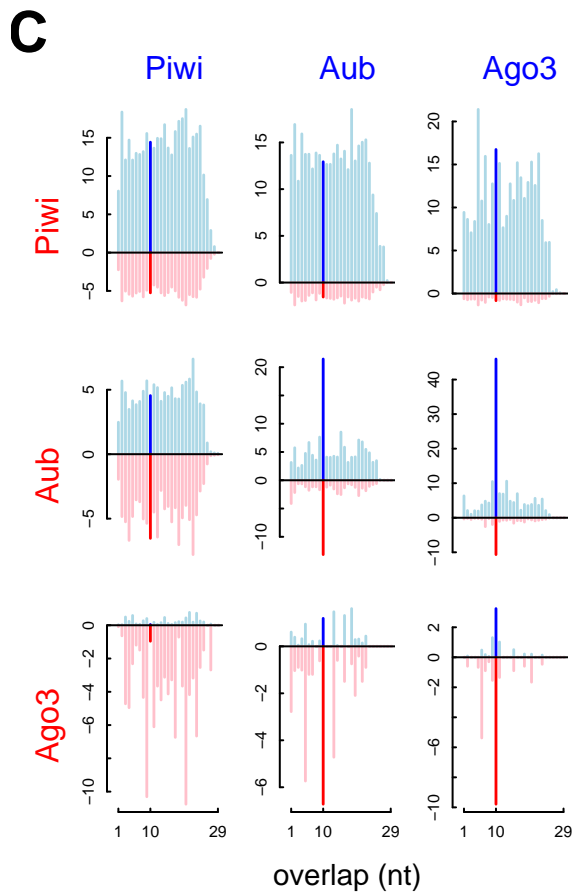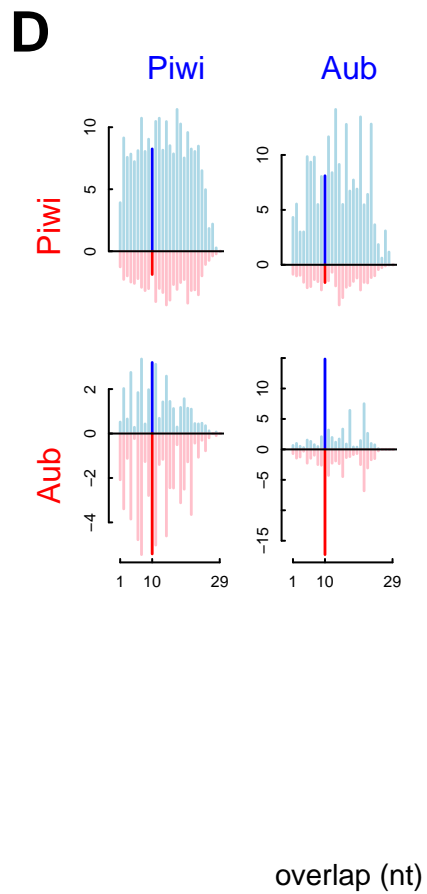

# *gypsy8*

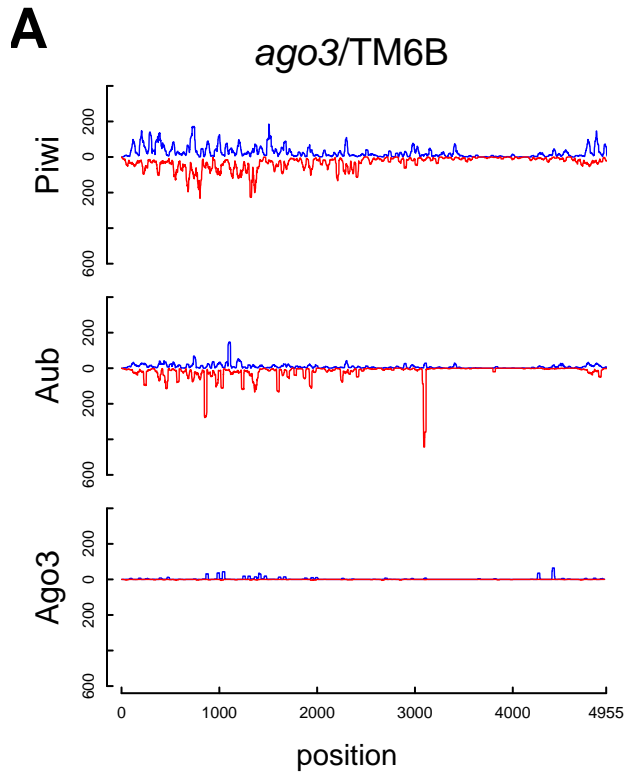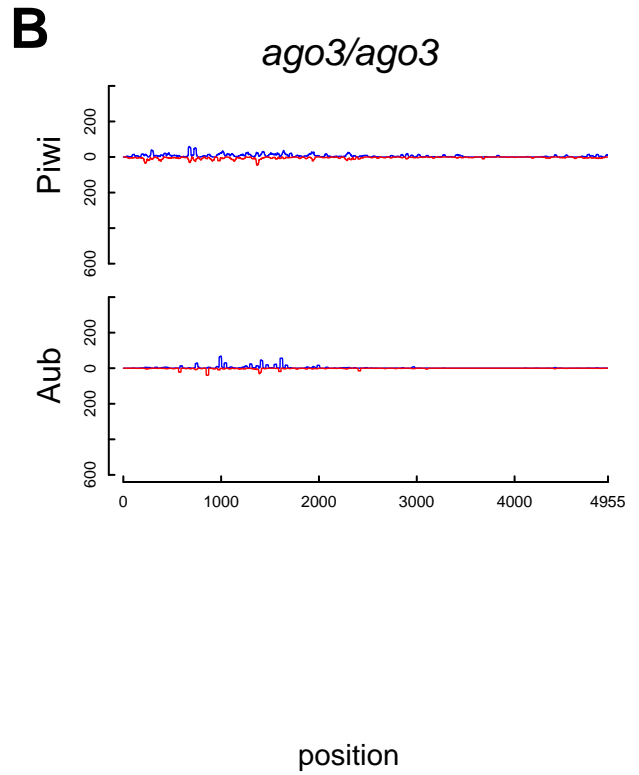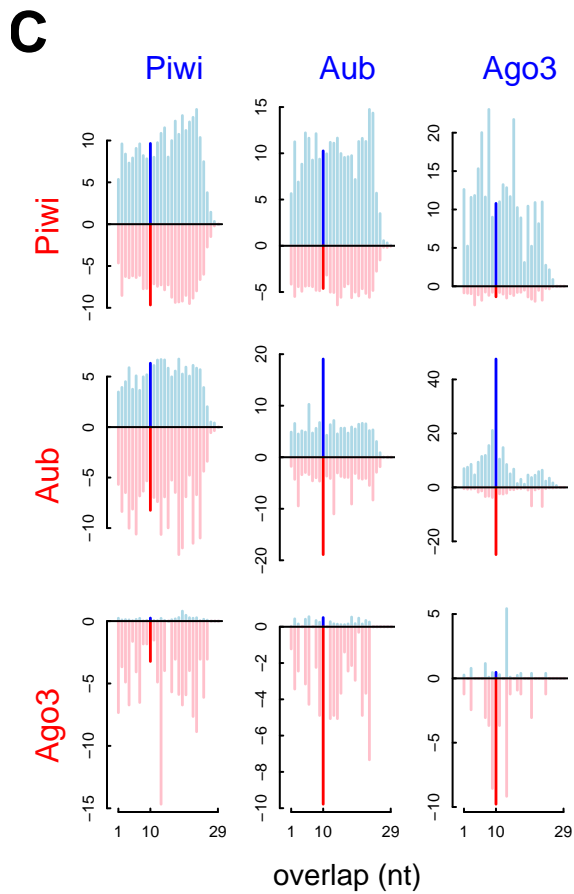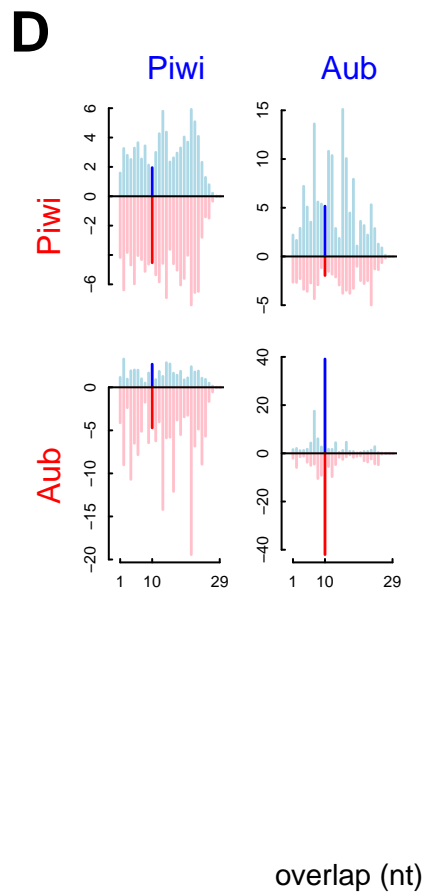

# *gypsy10*

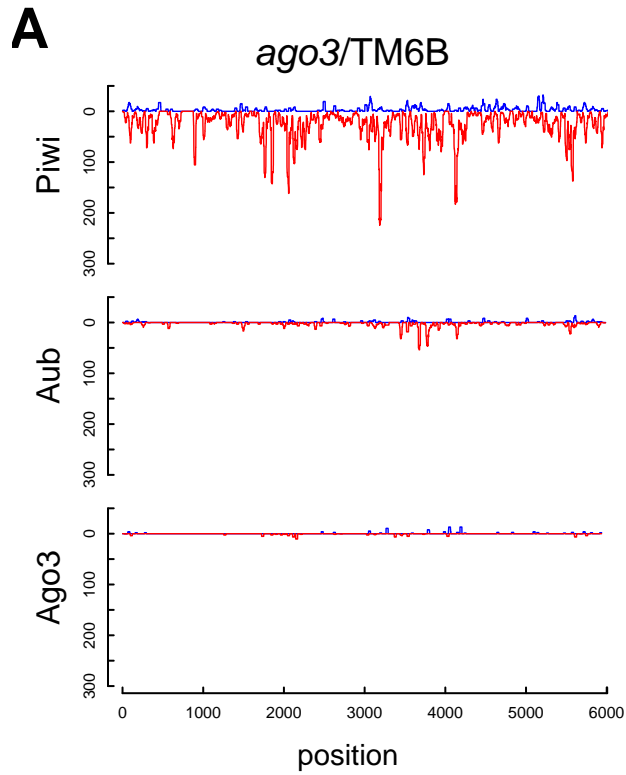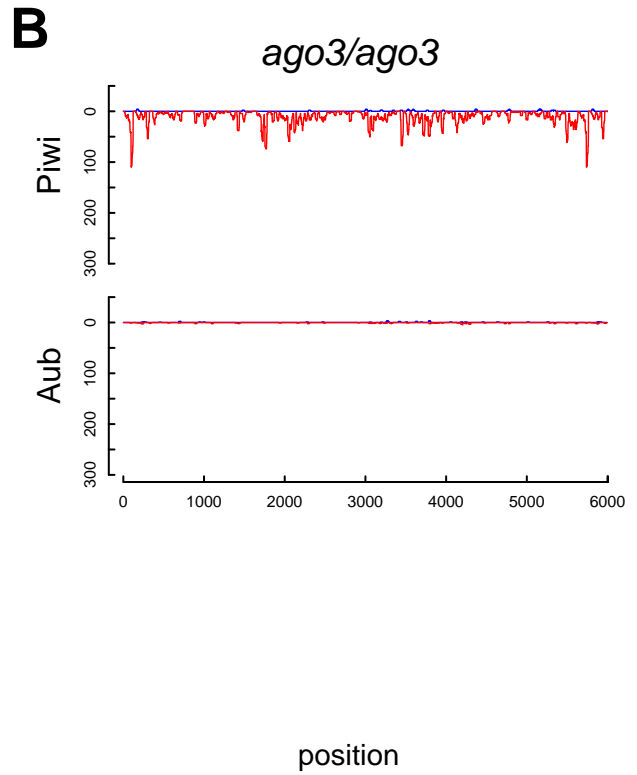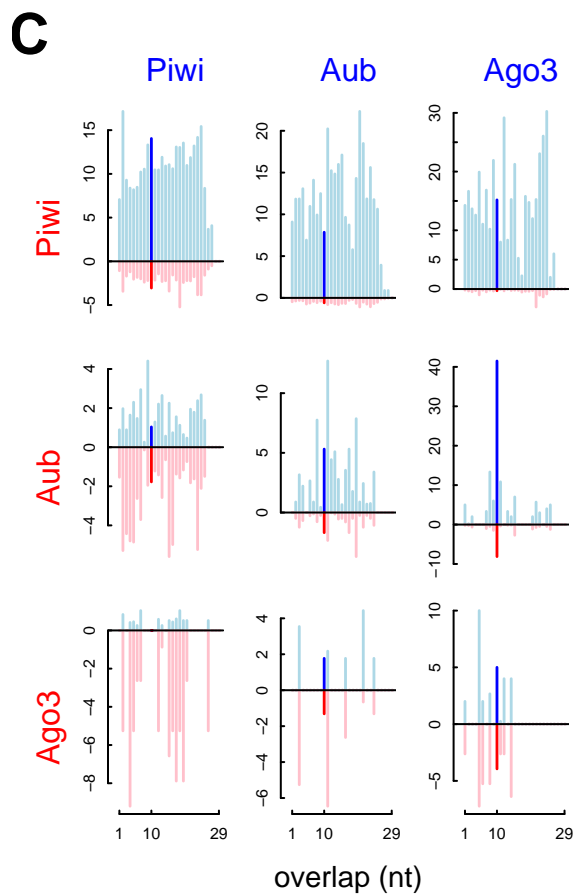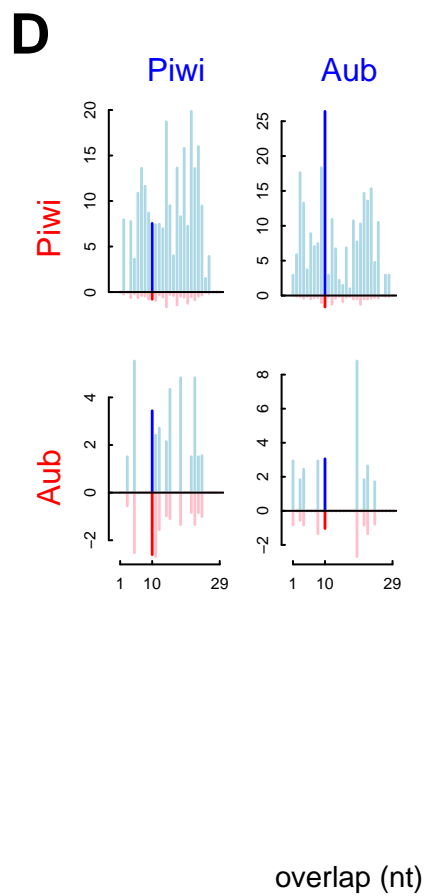



# *gypsy11*

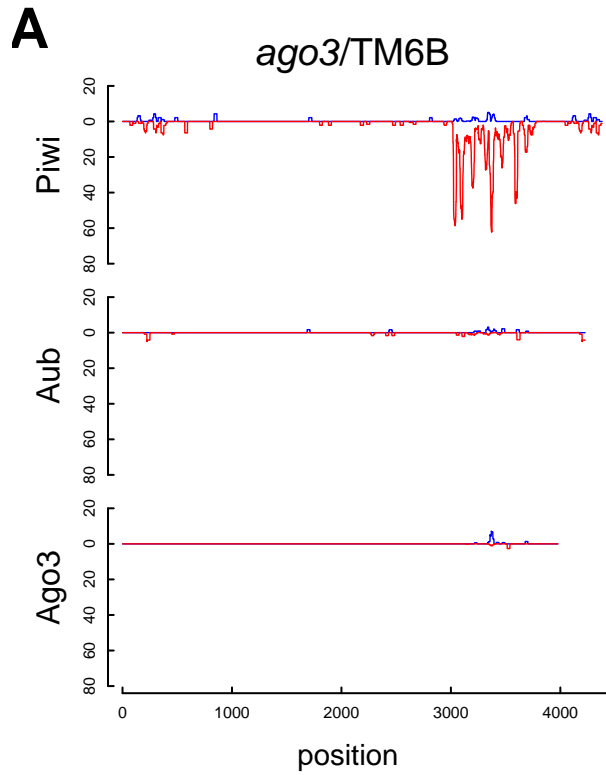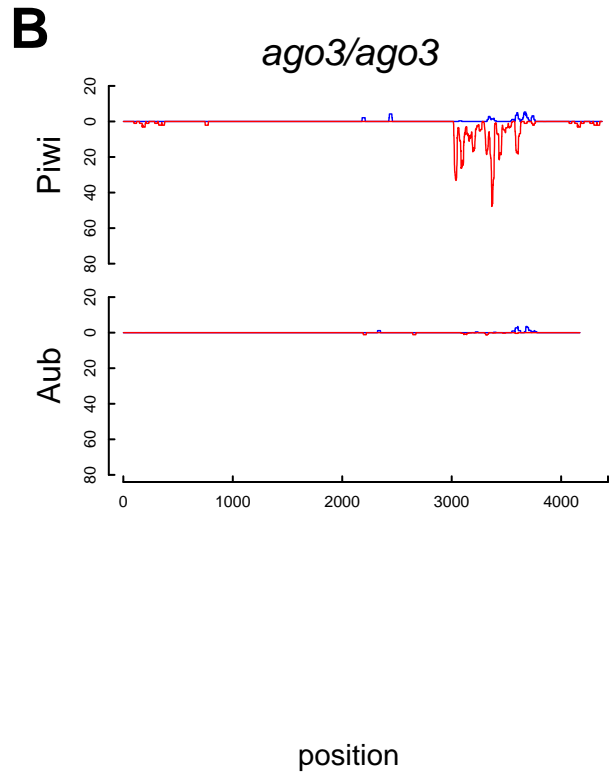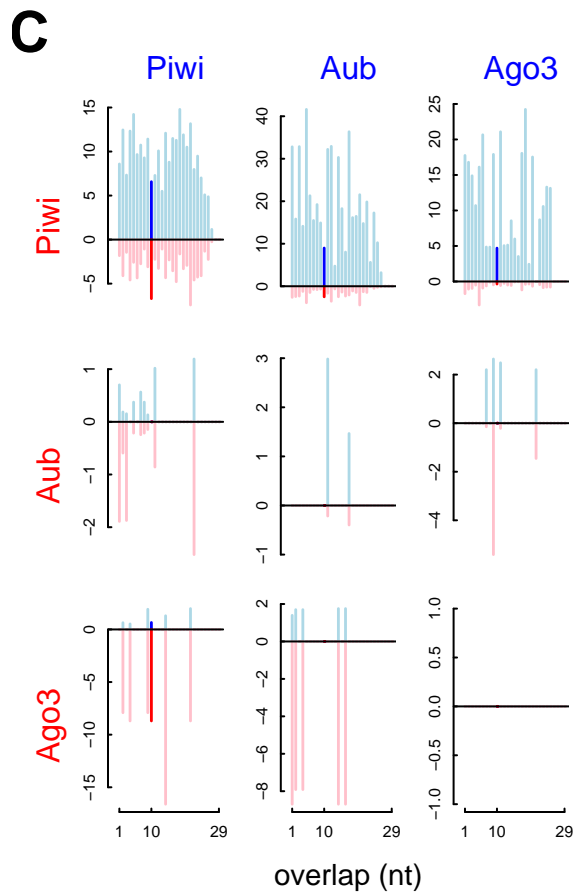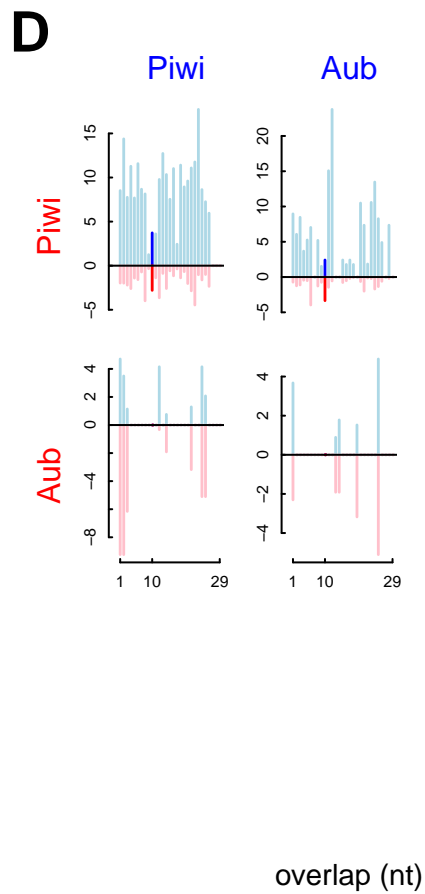

# *gypsy12*

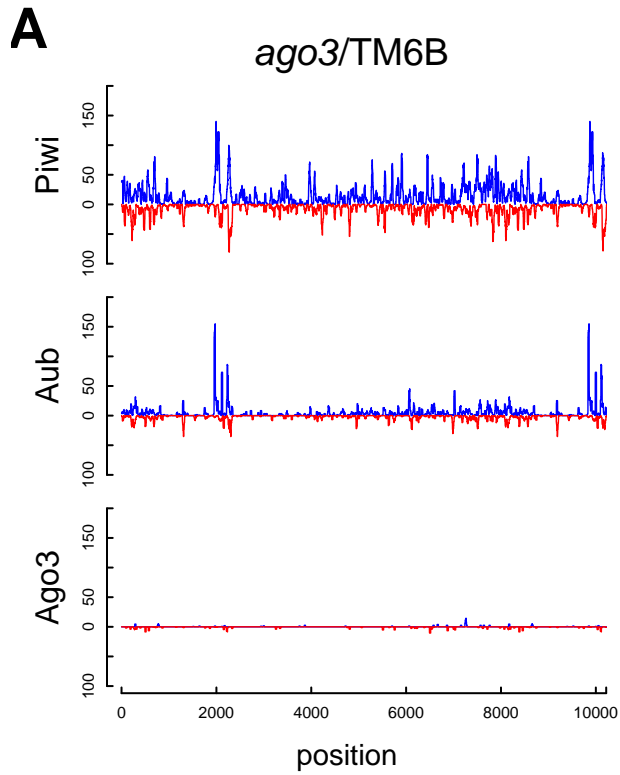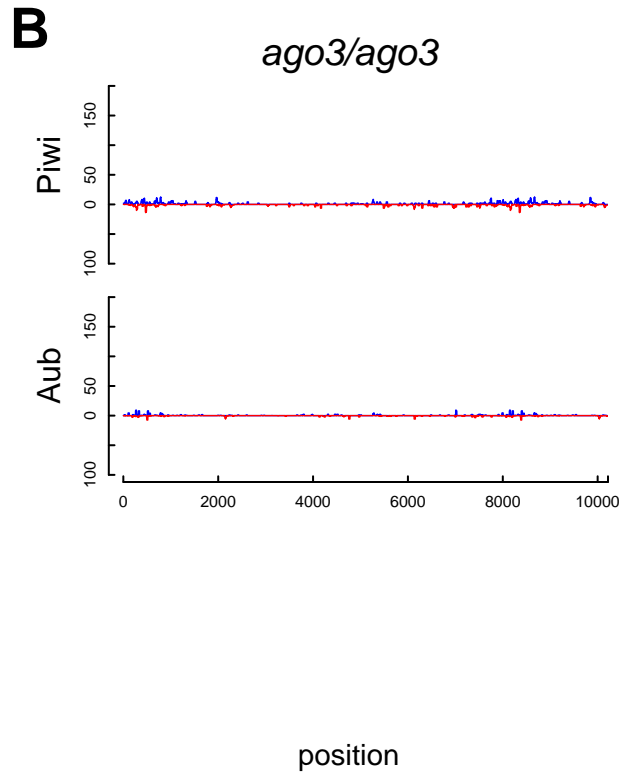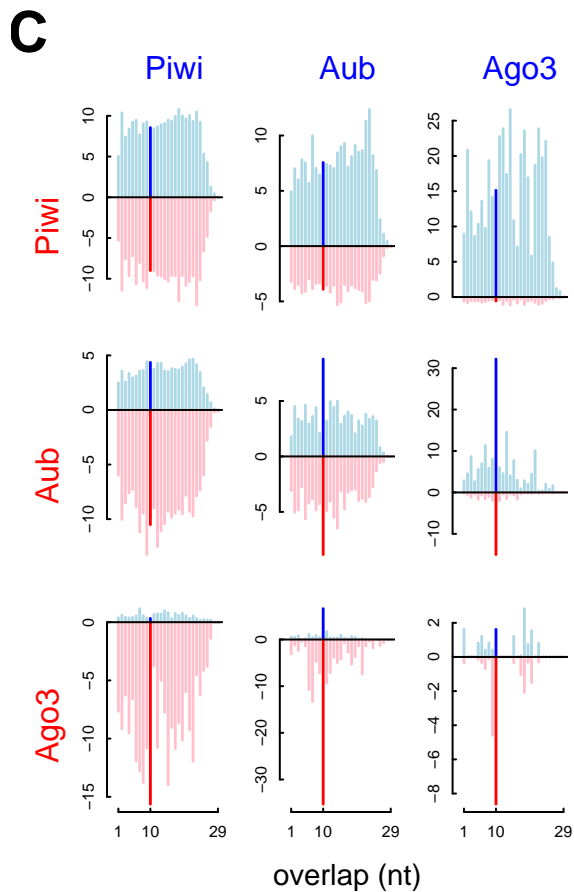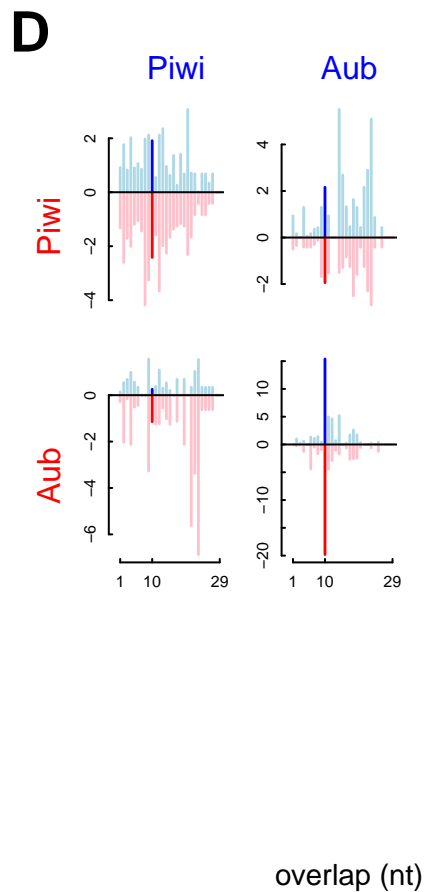

# Helena

**A**

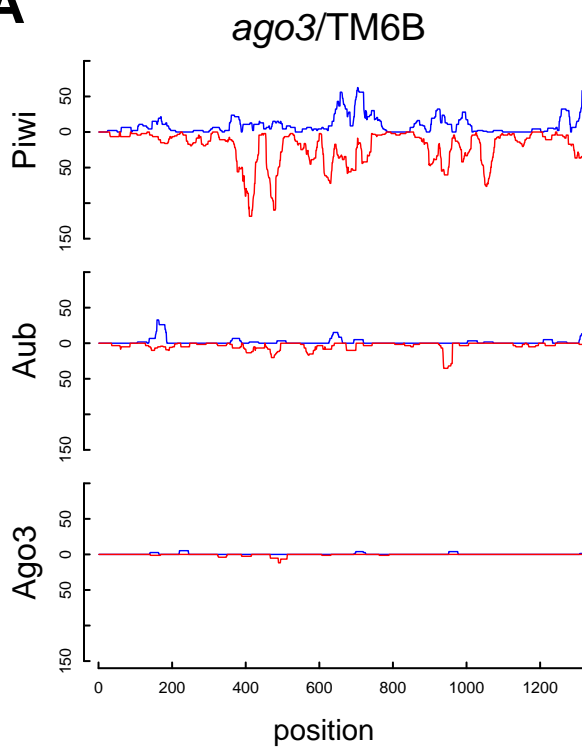

**B**

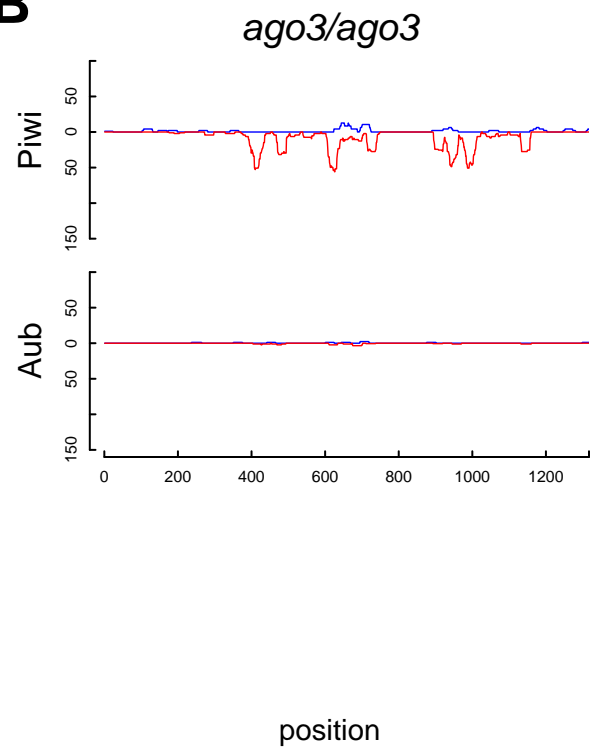

**C**

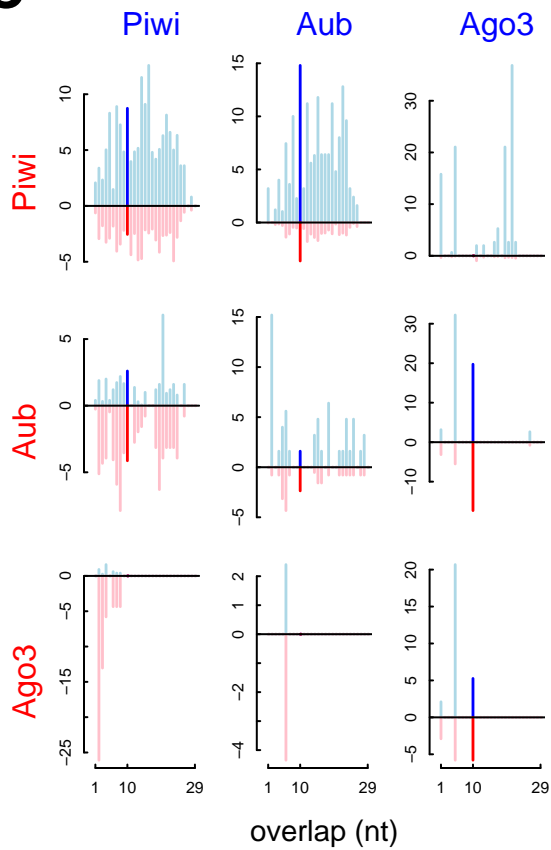

**D**

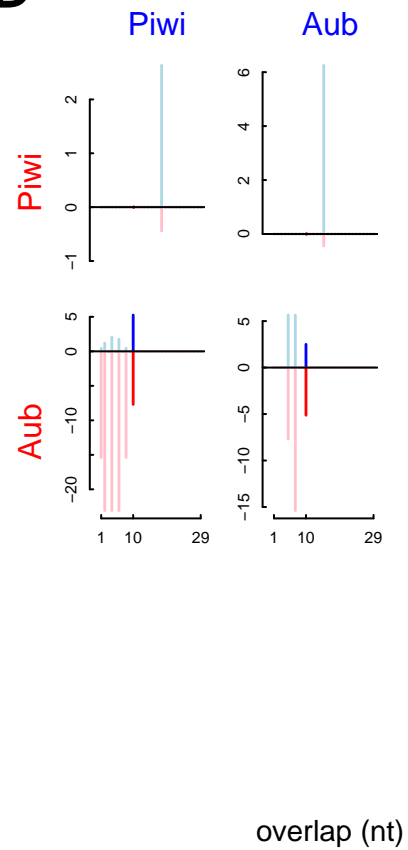

# HeT A

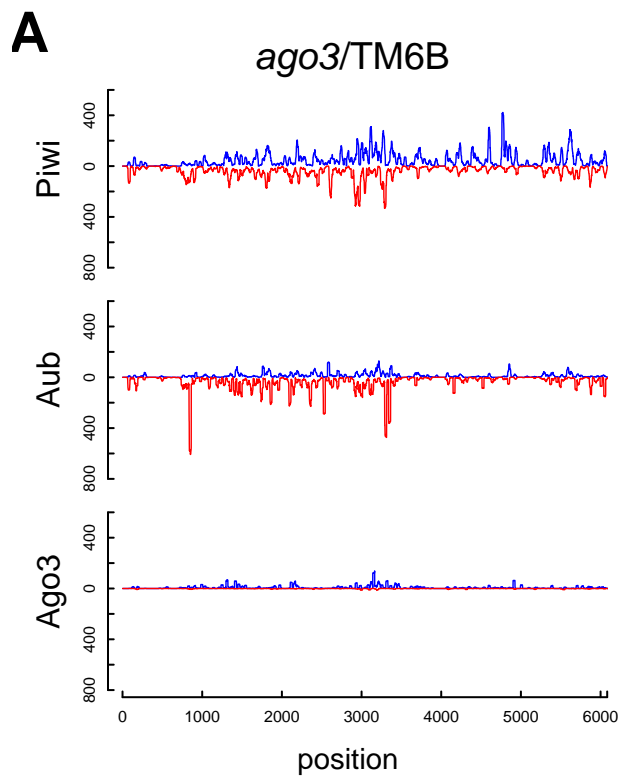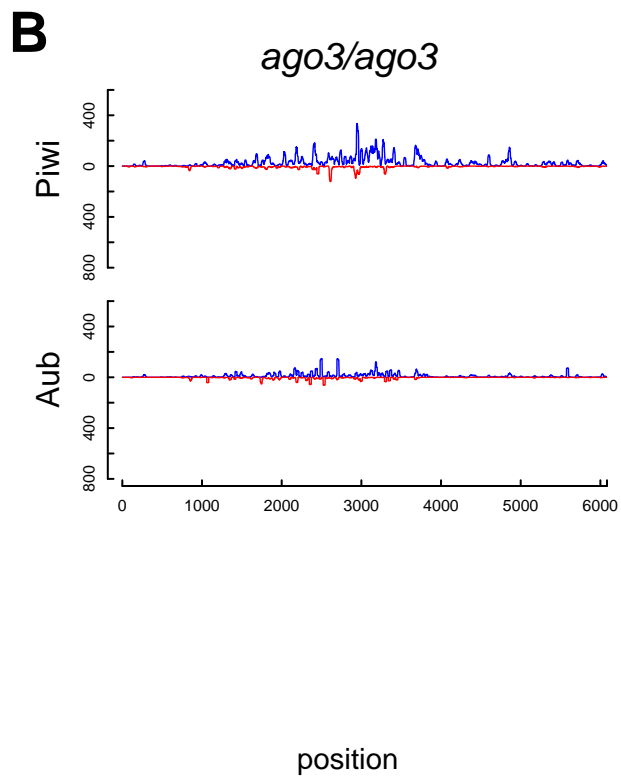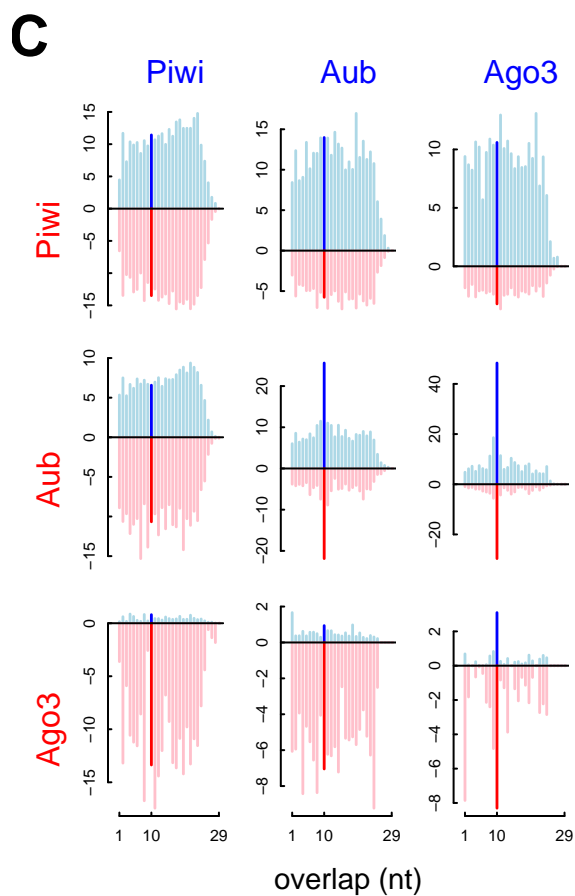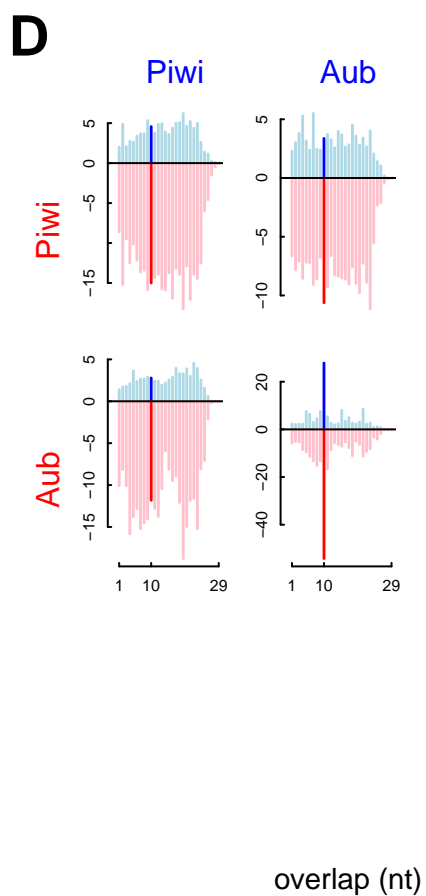

# HMS Beagle

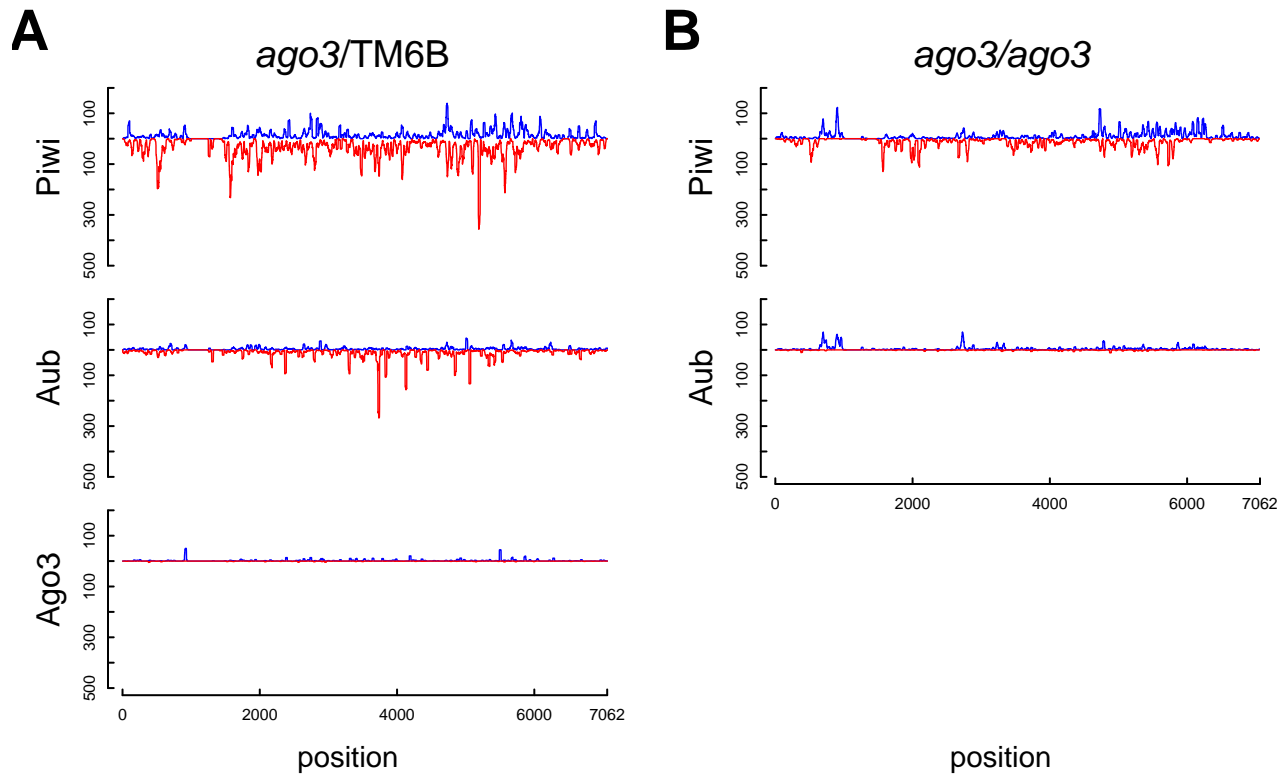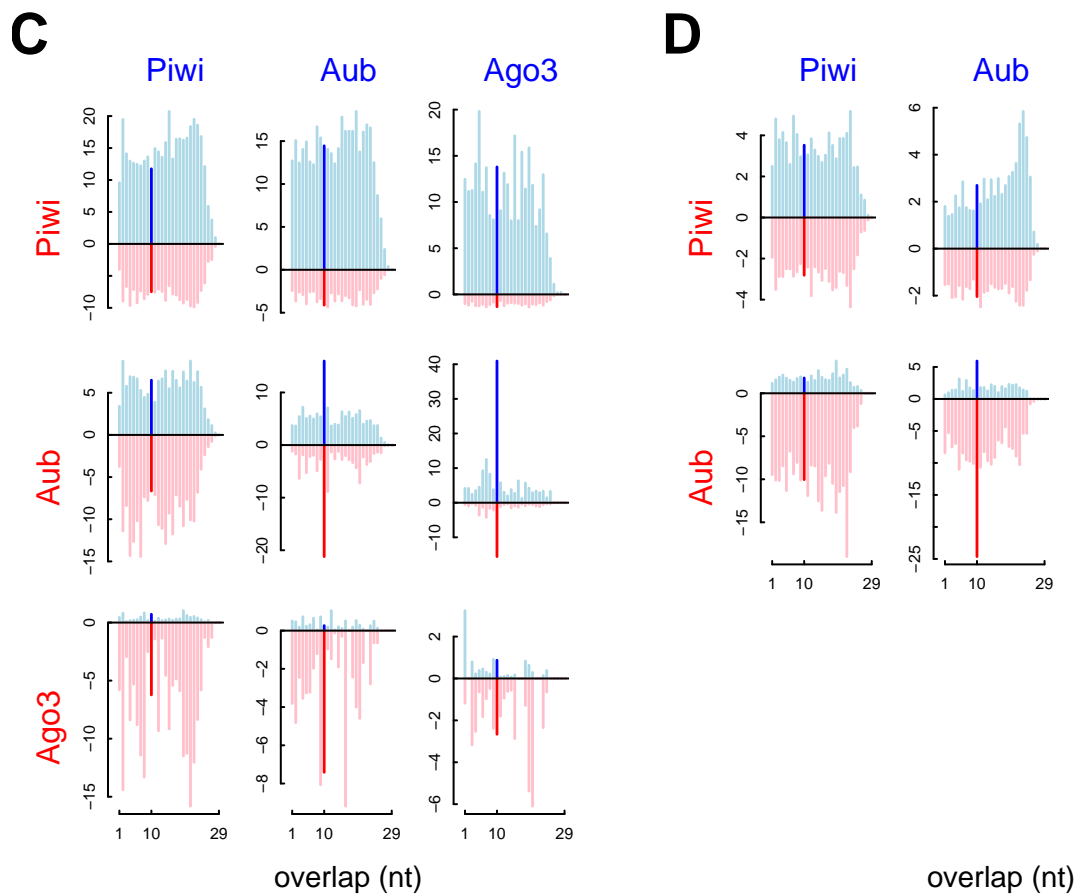

# HMS Beagle2

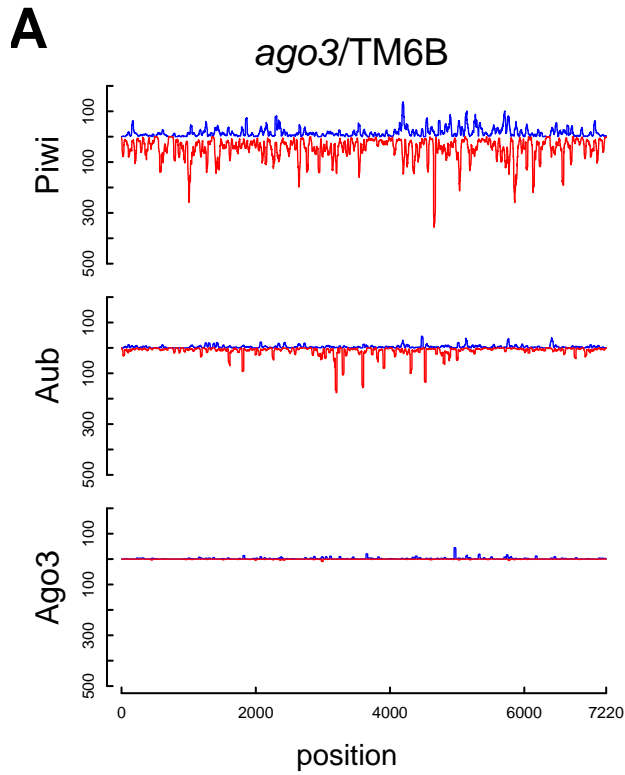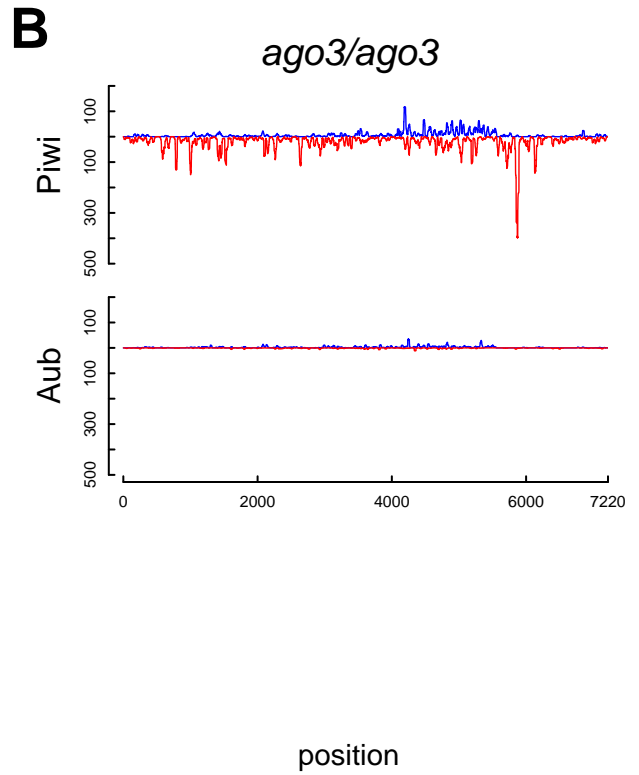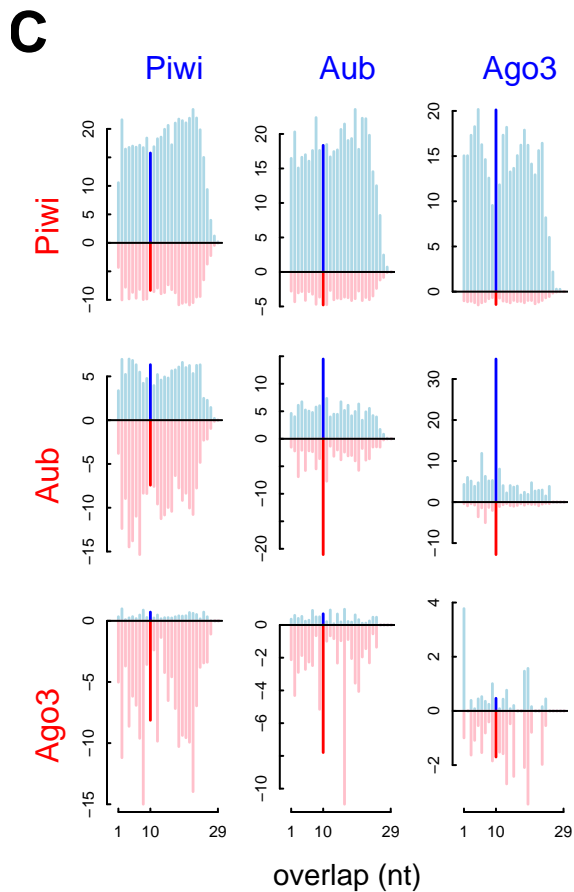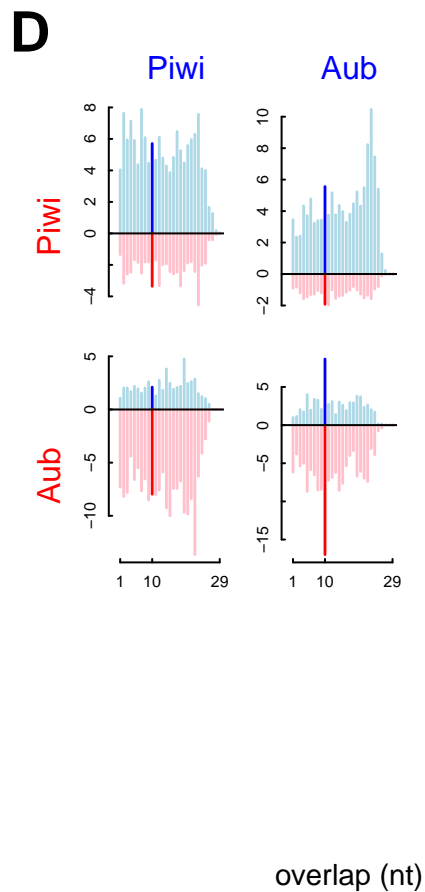

# *hobo*

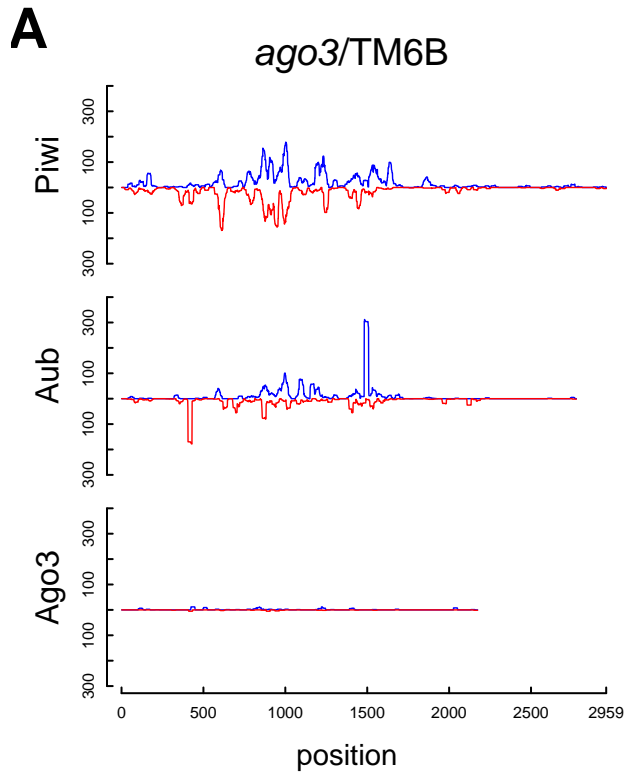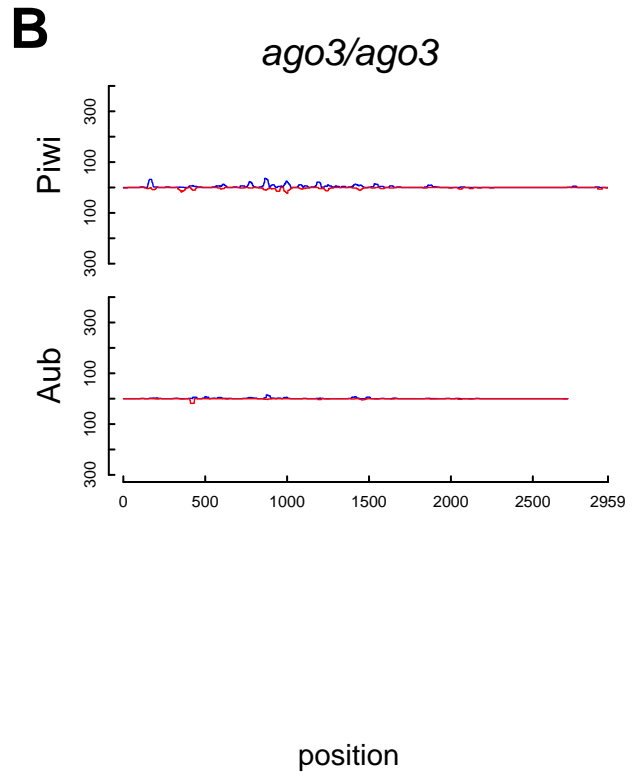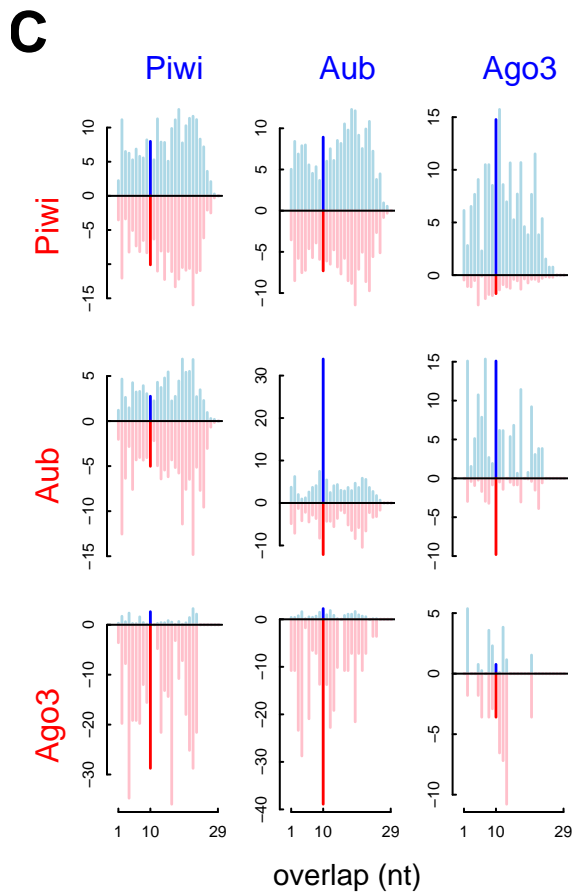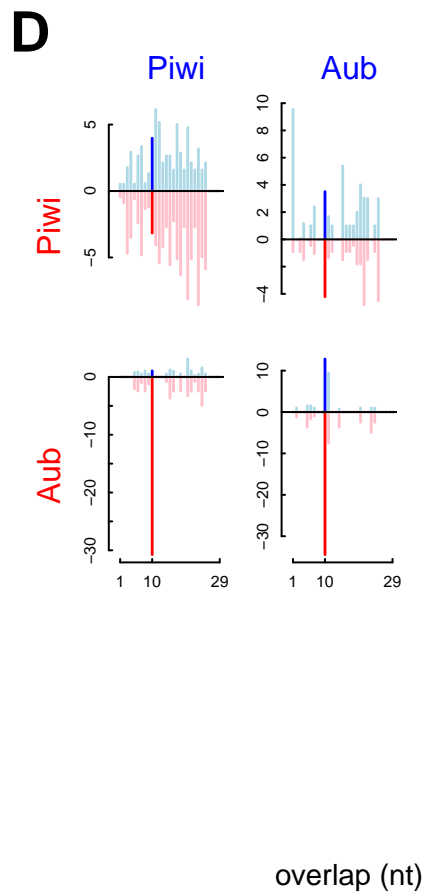

# *hopper*

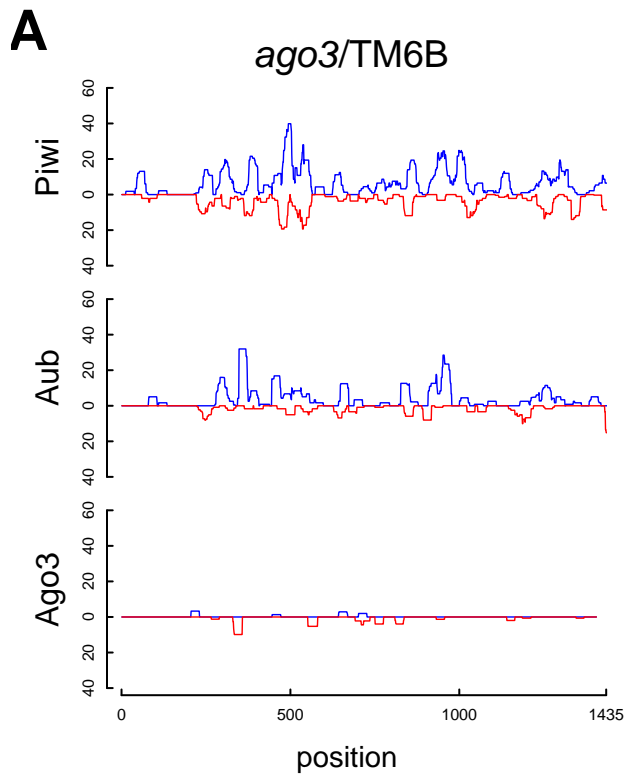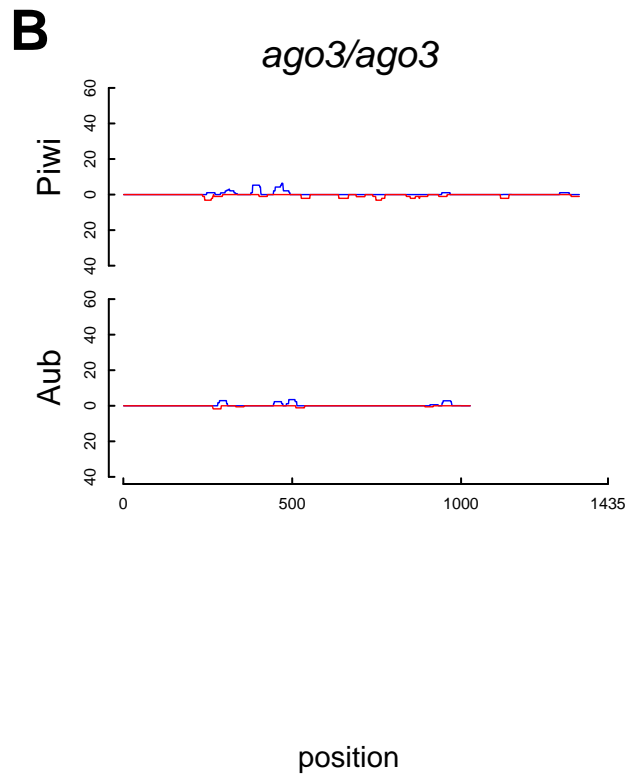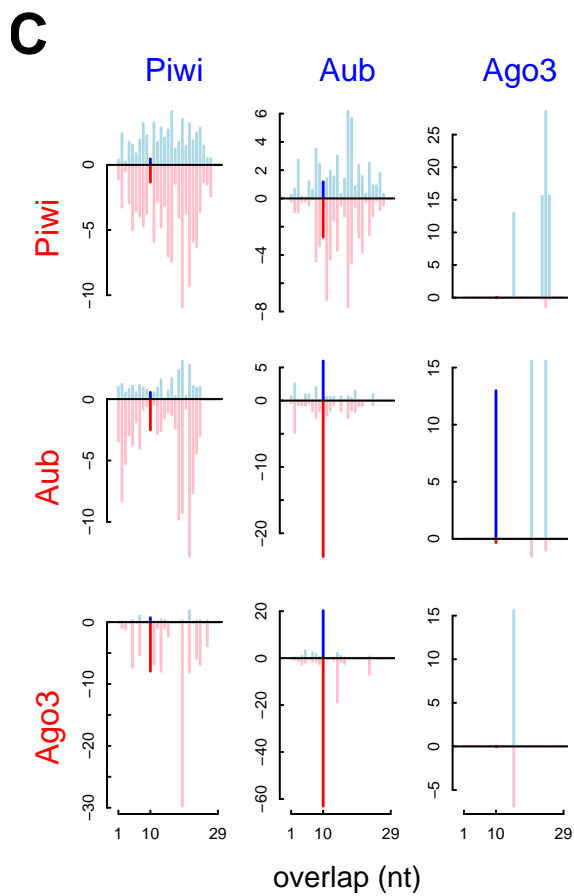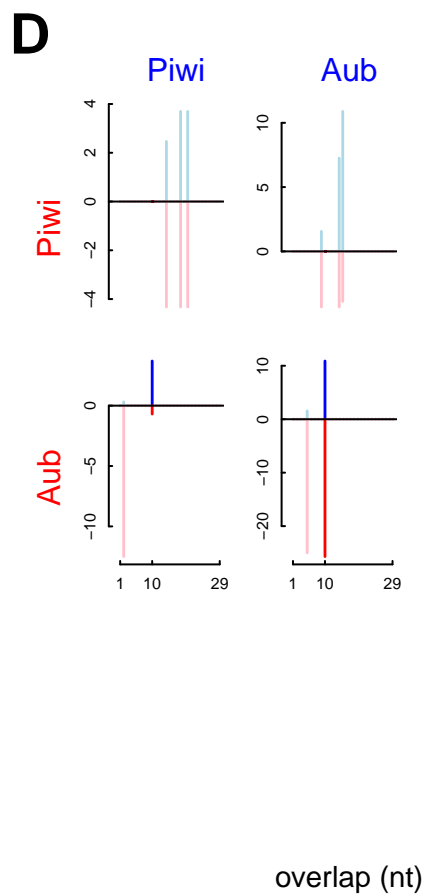



# *hopper2*

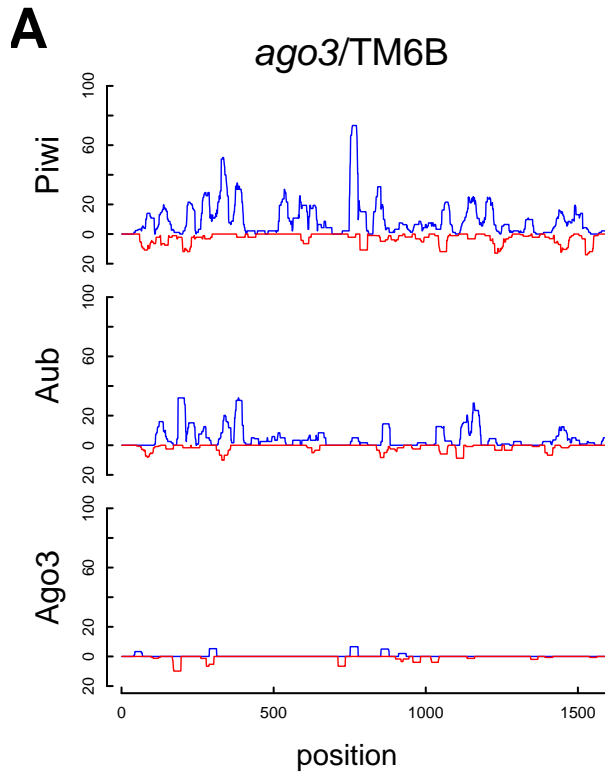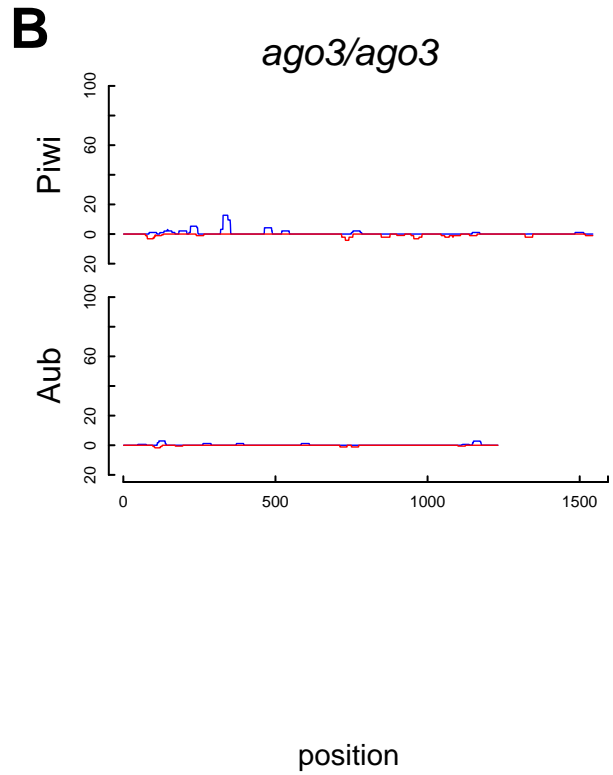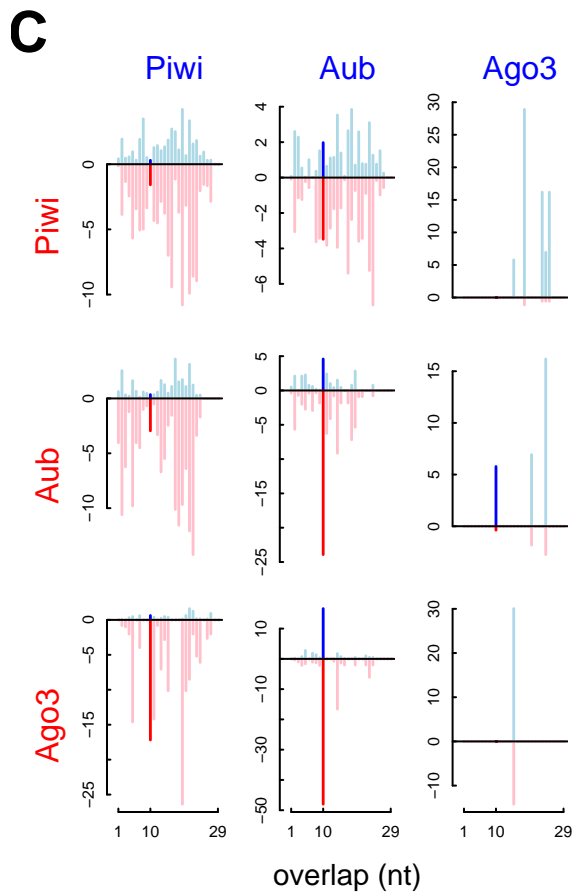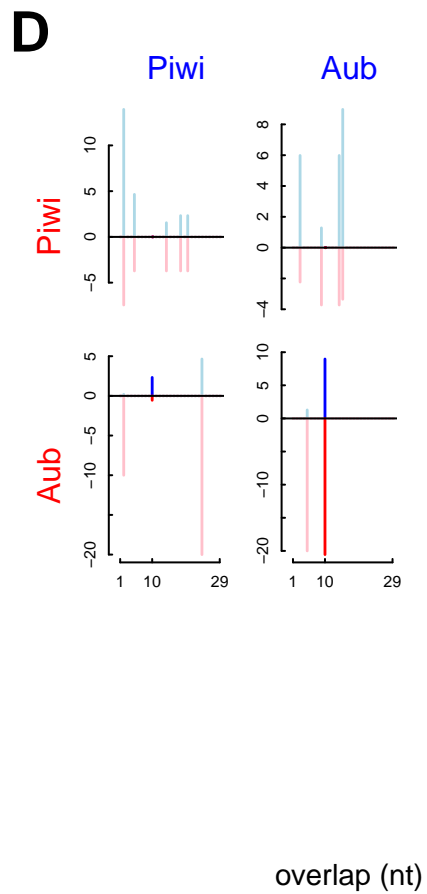

# *I element*

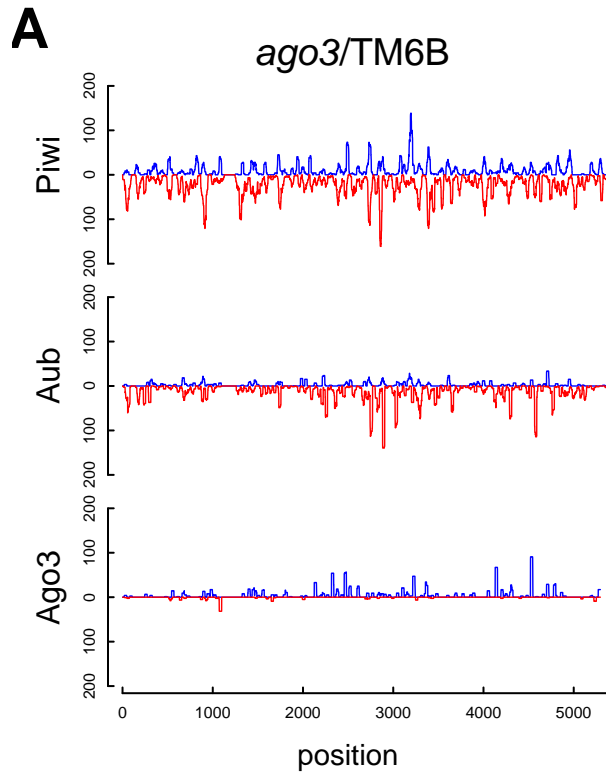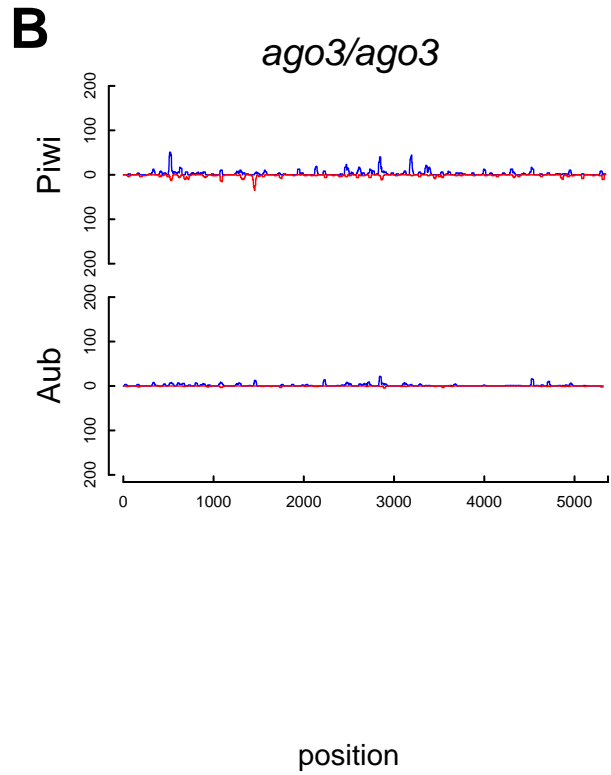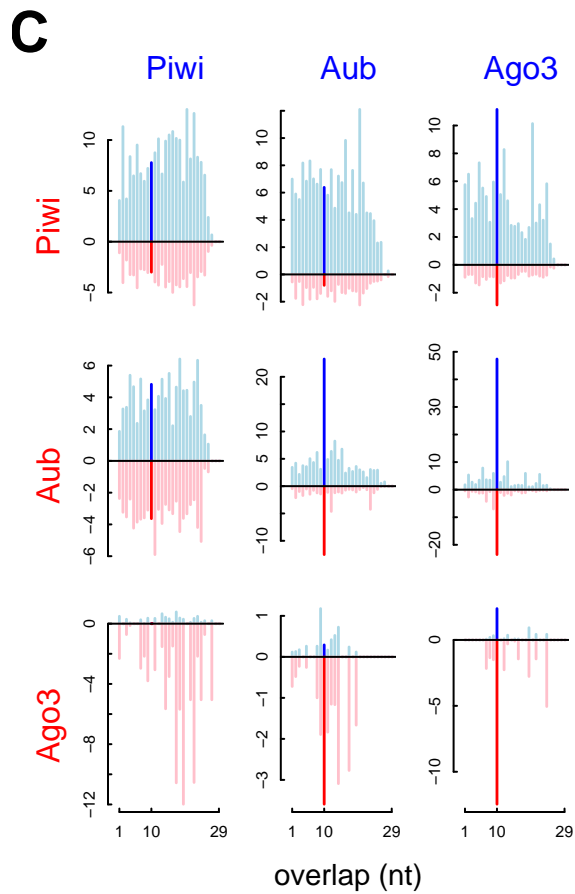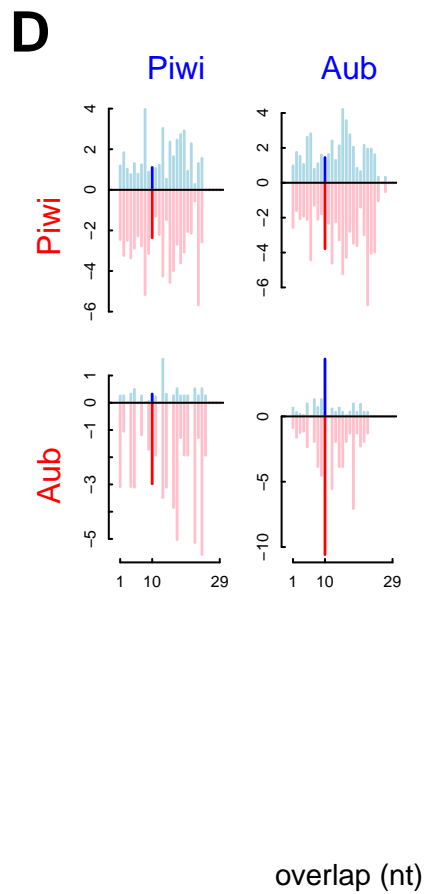

# Idefix

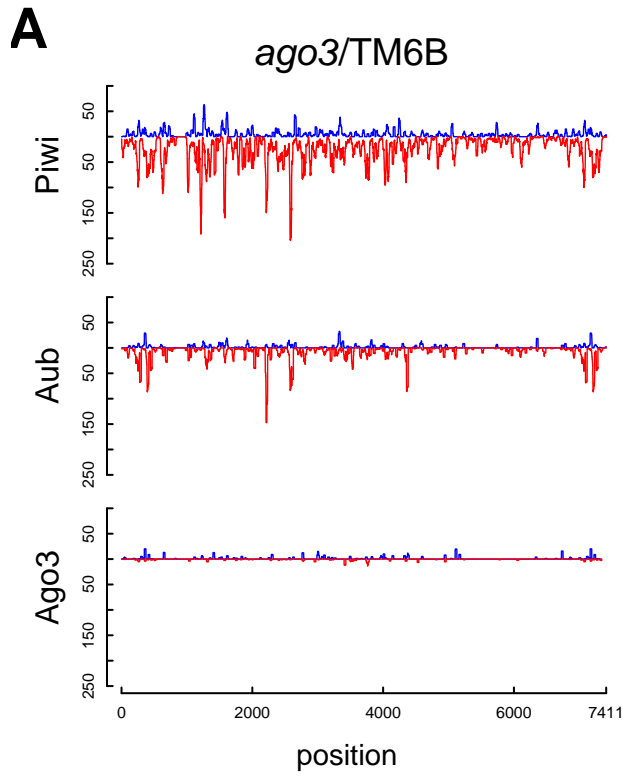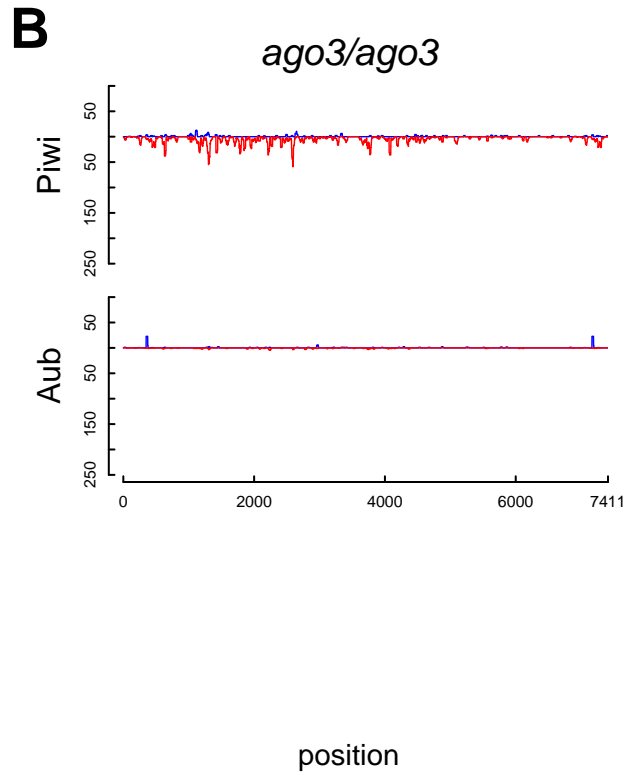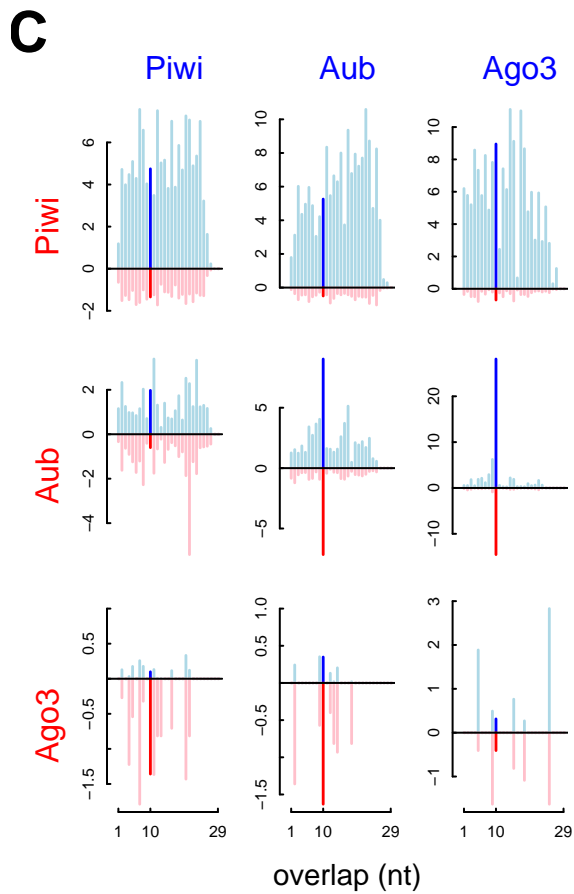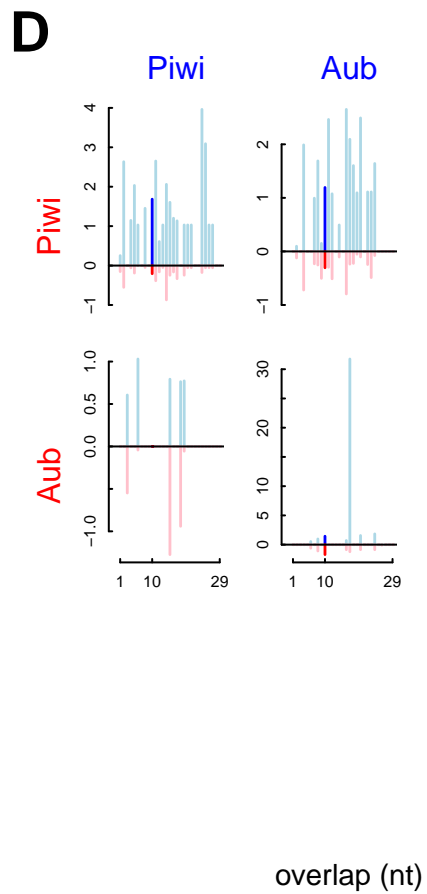

# INE 1

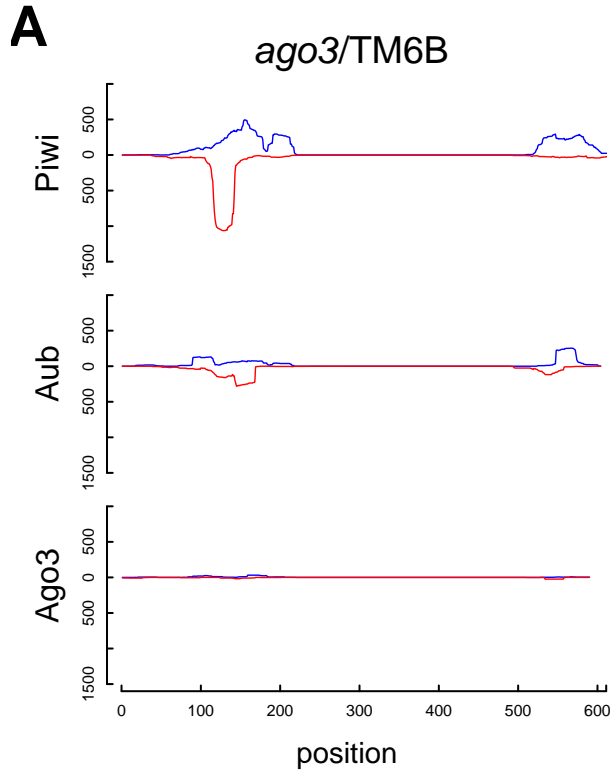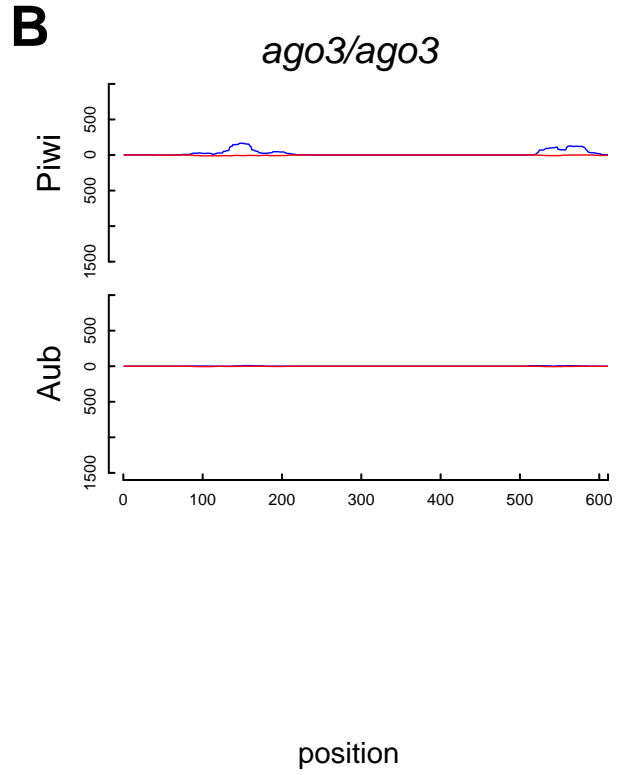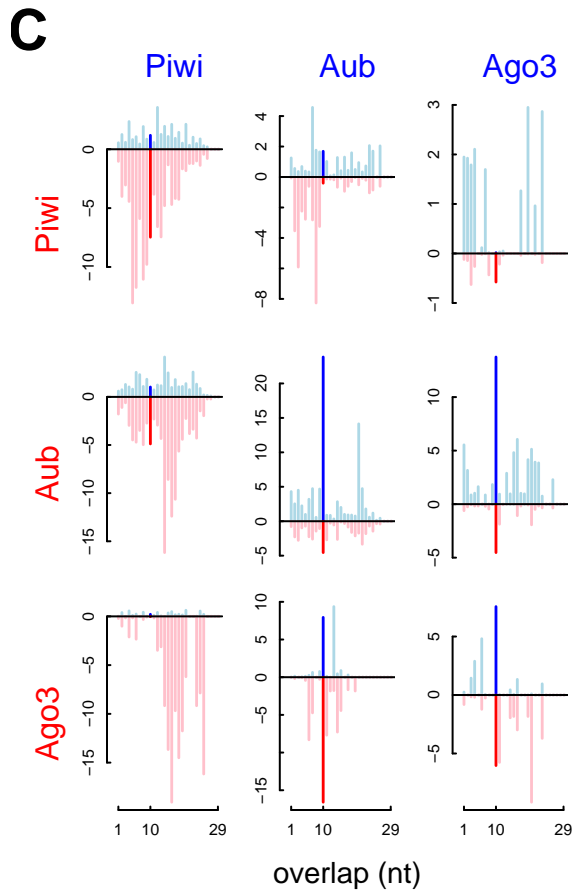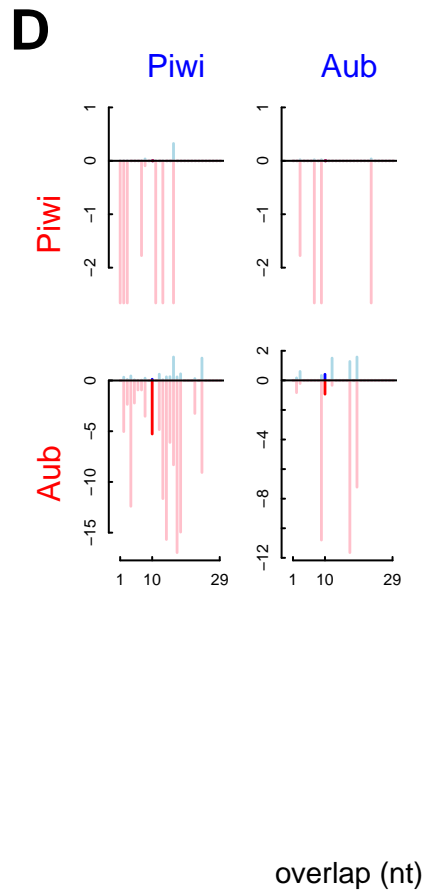

# *invader1*

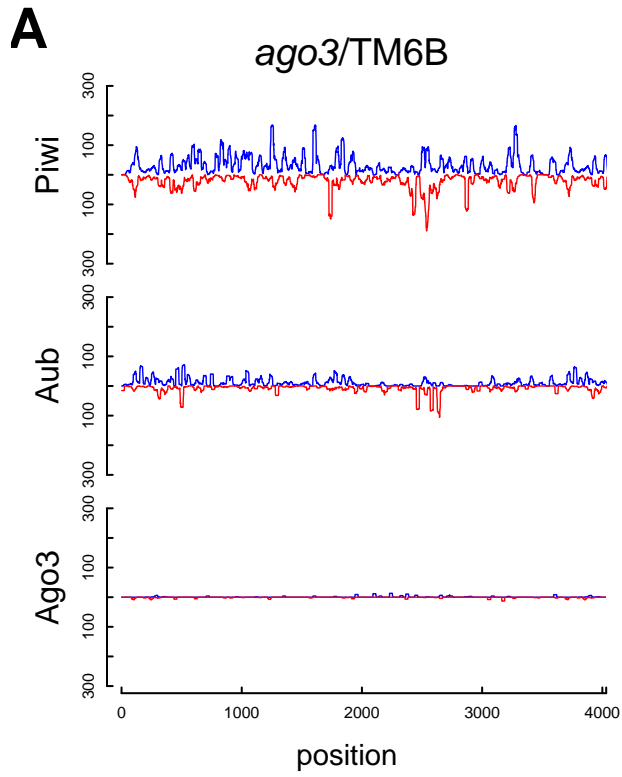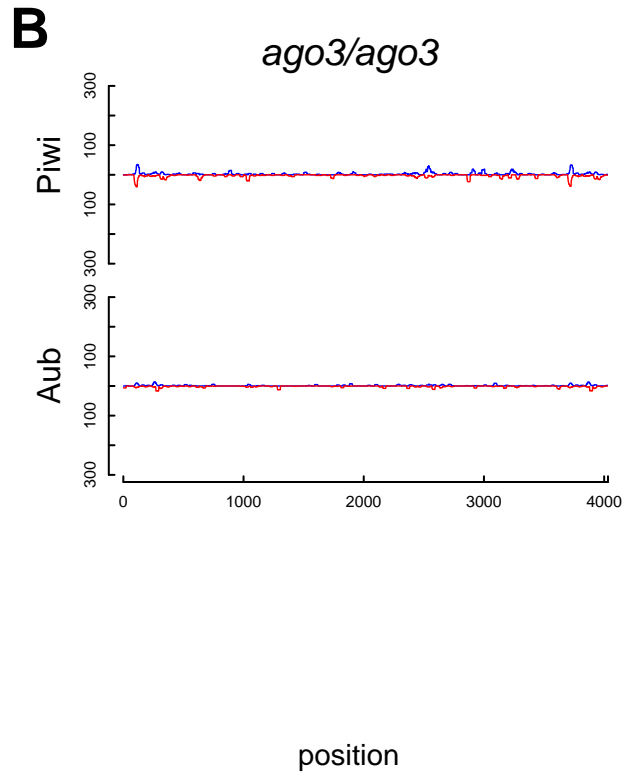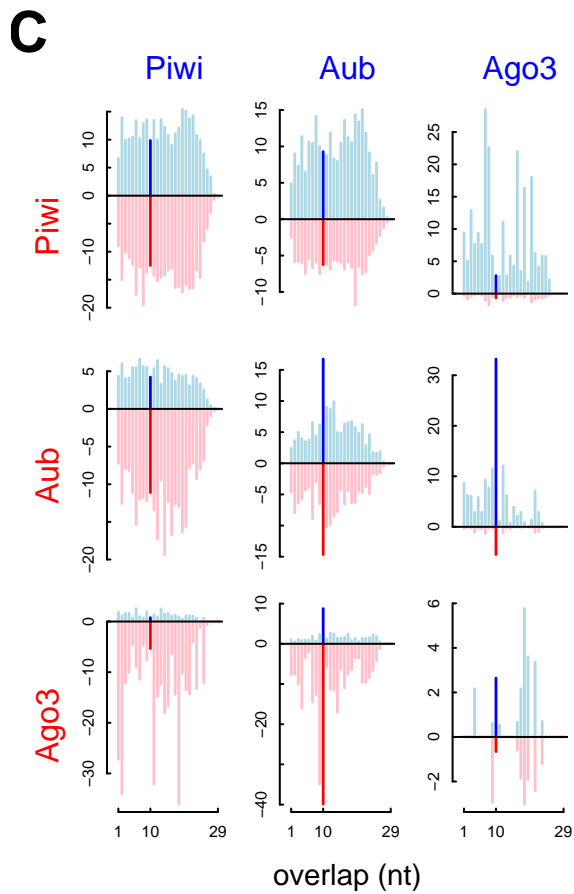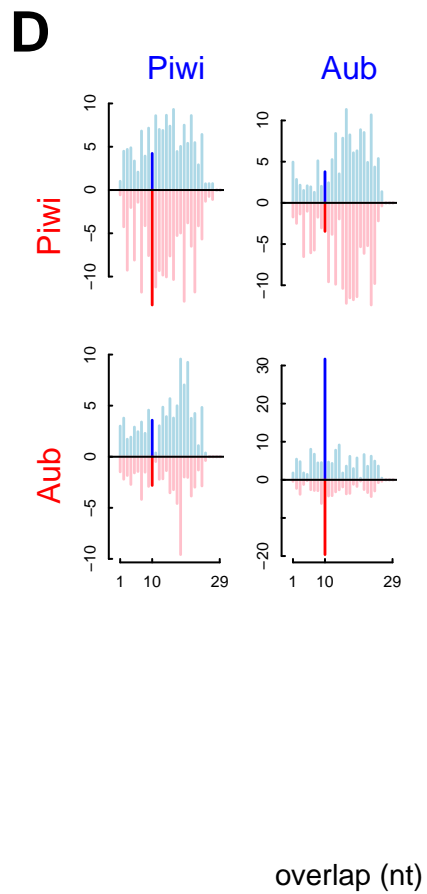

# *invader2*

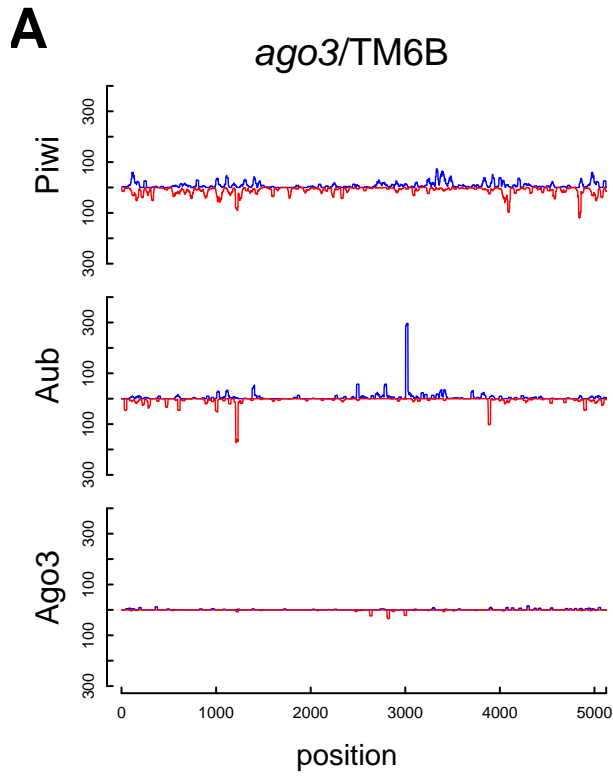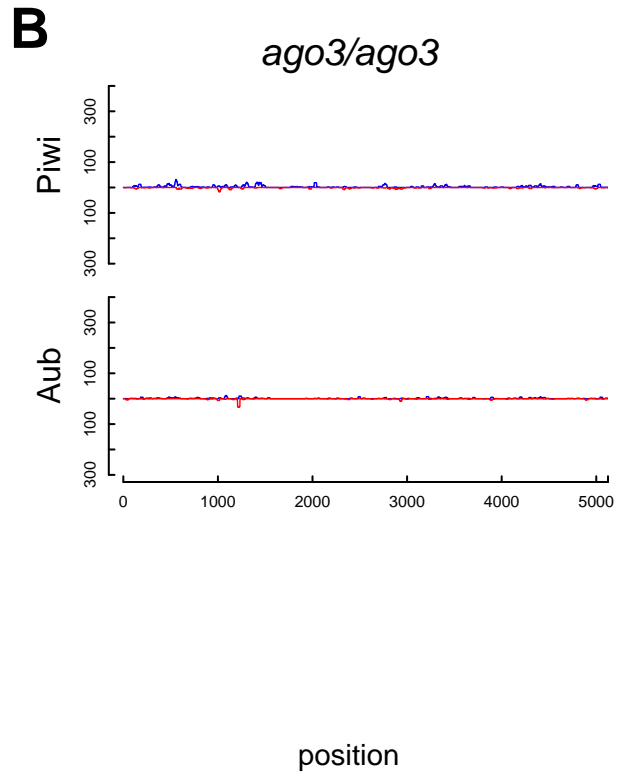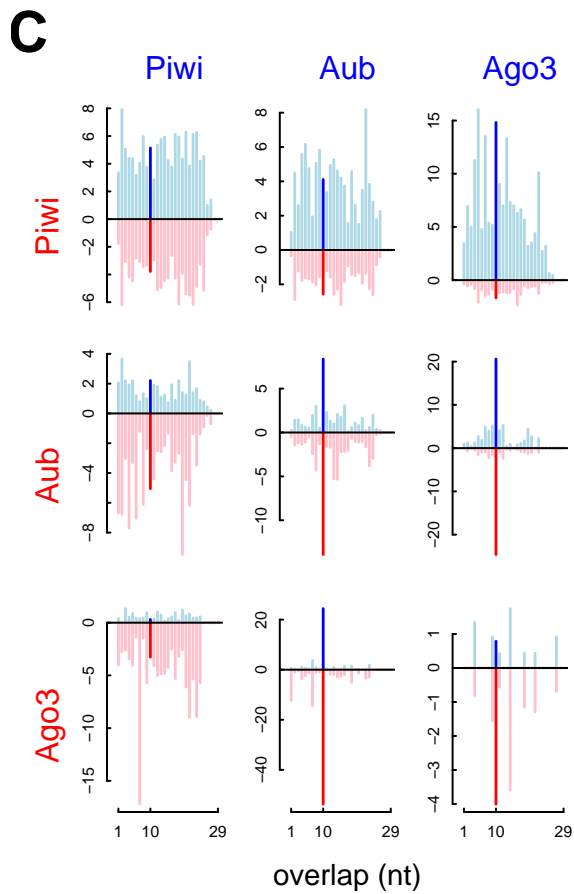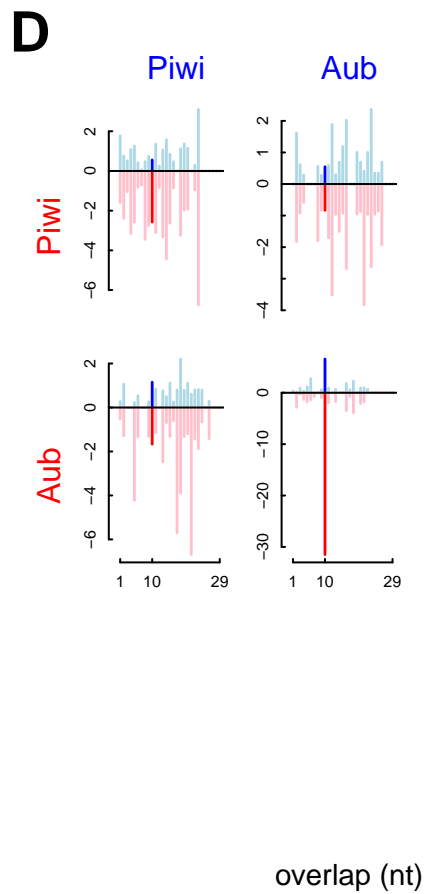

# *invader3*

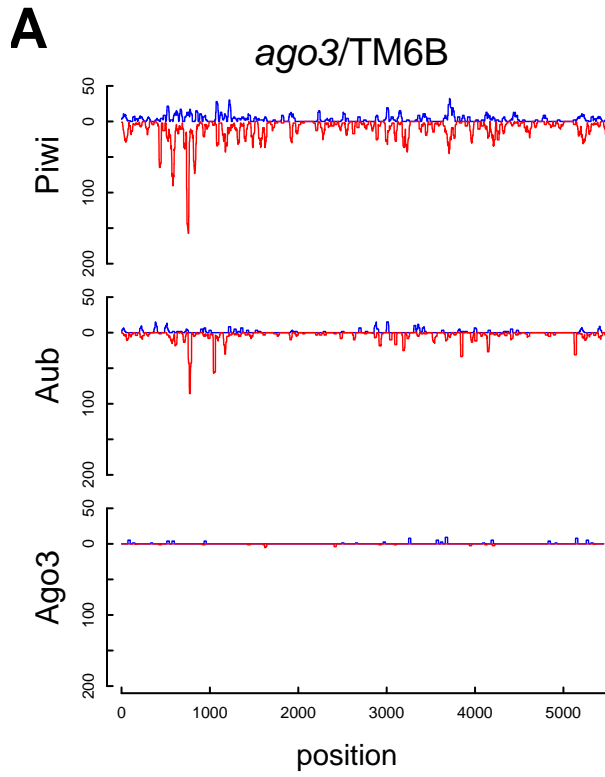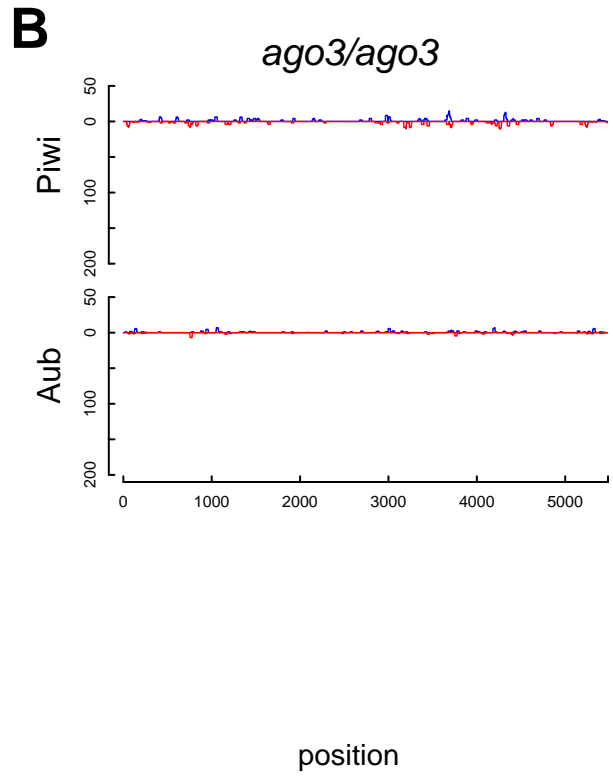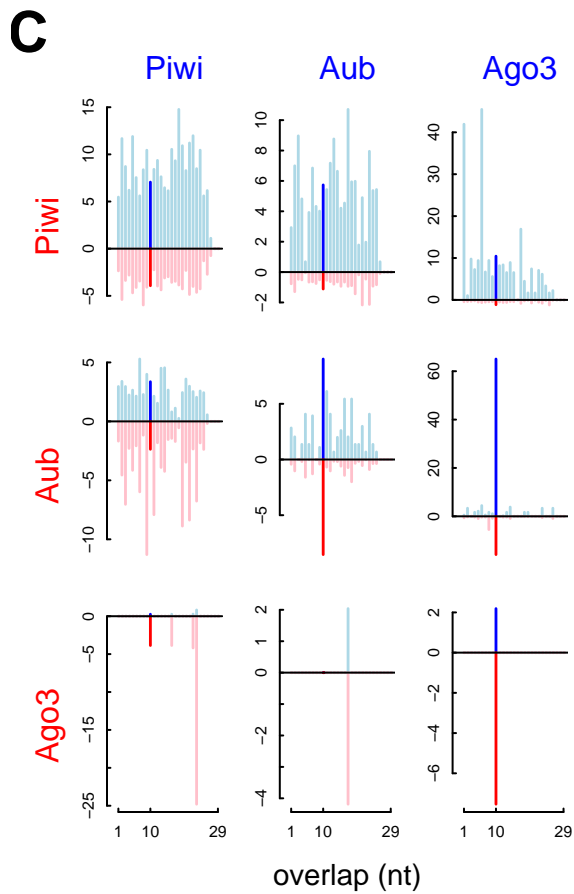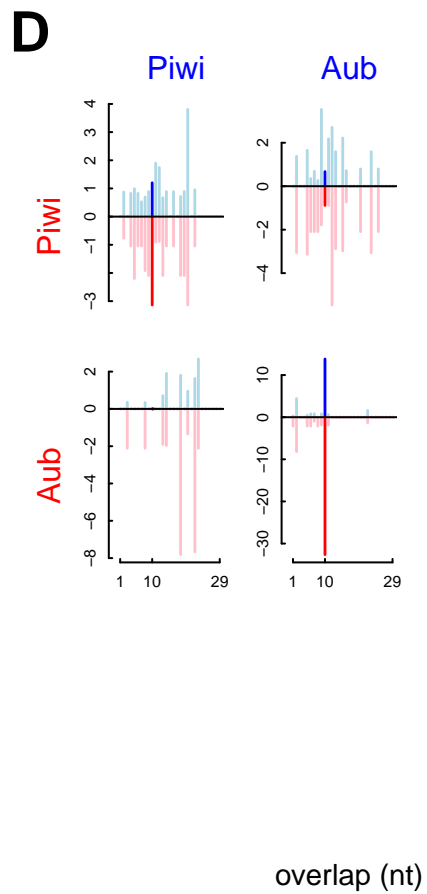

# *invader4*

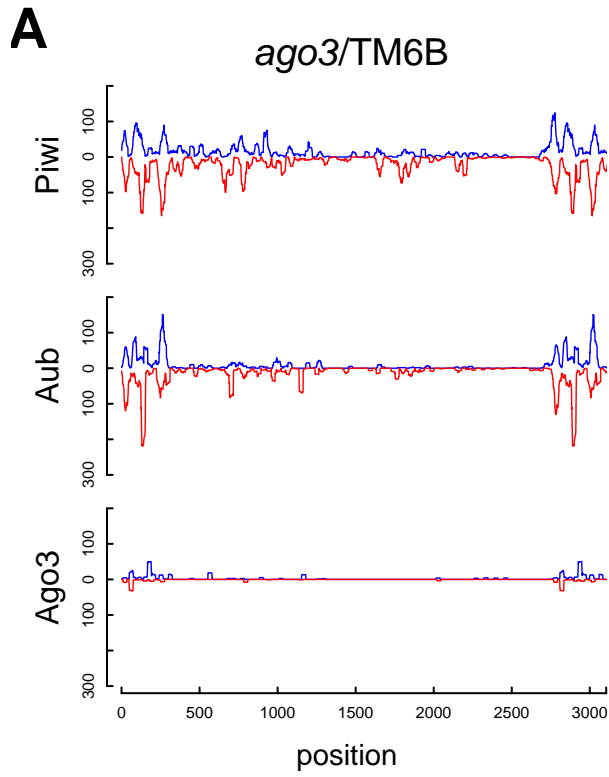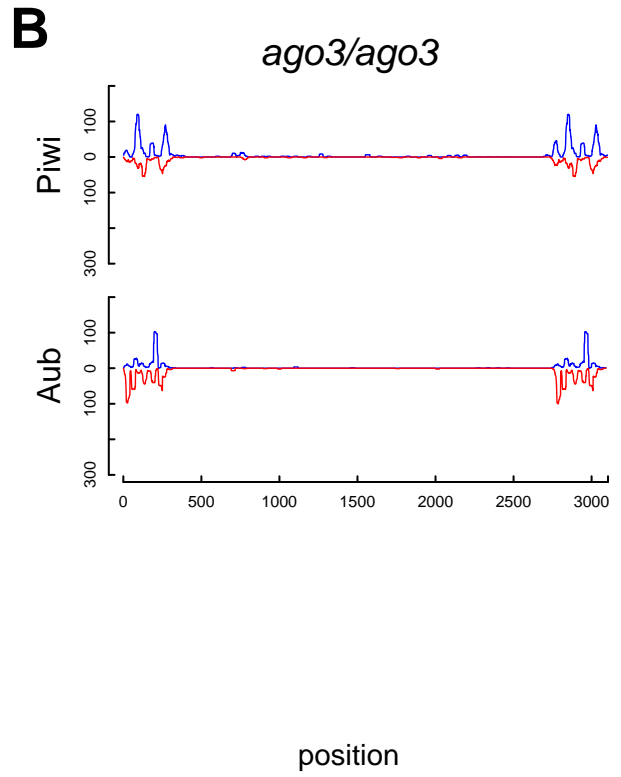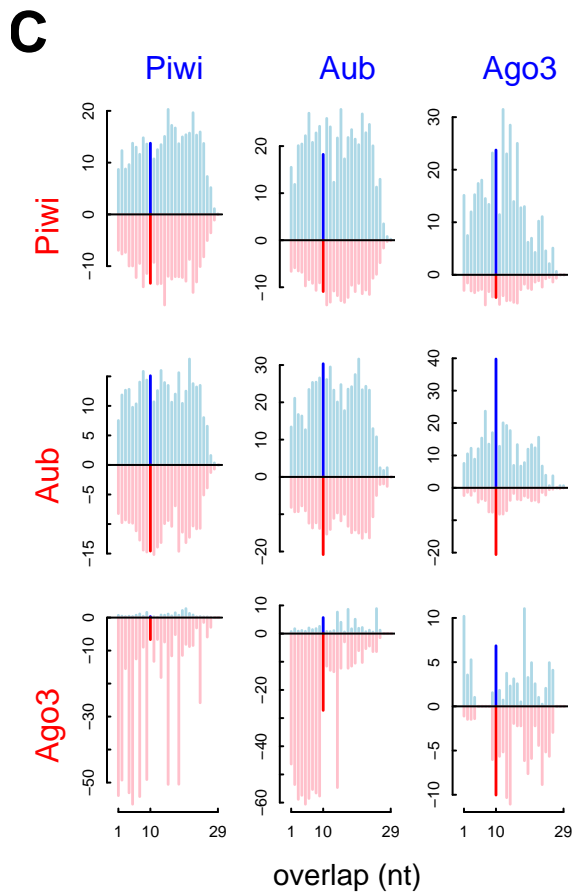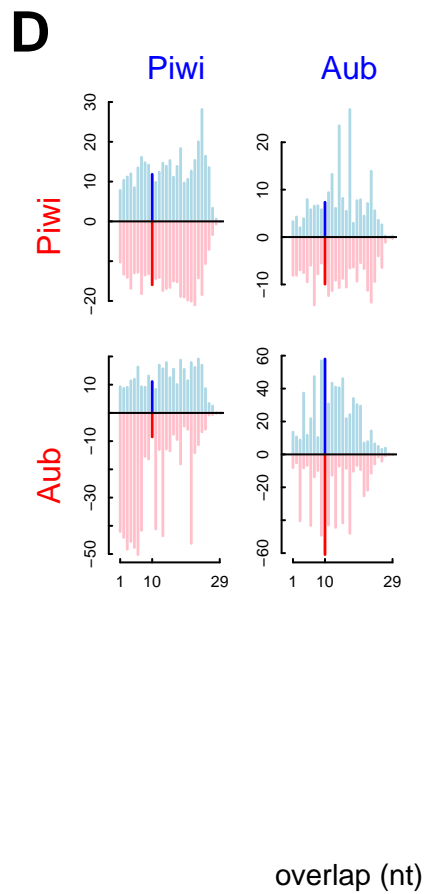



# *lvk*

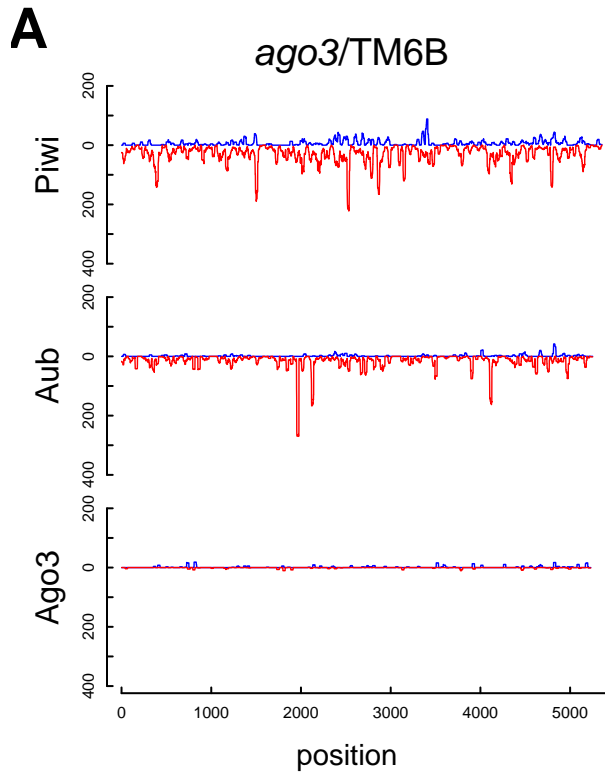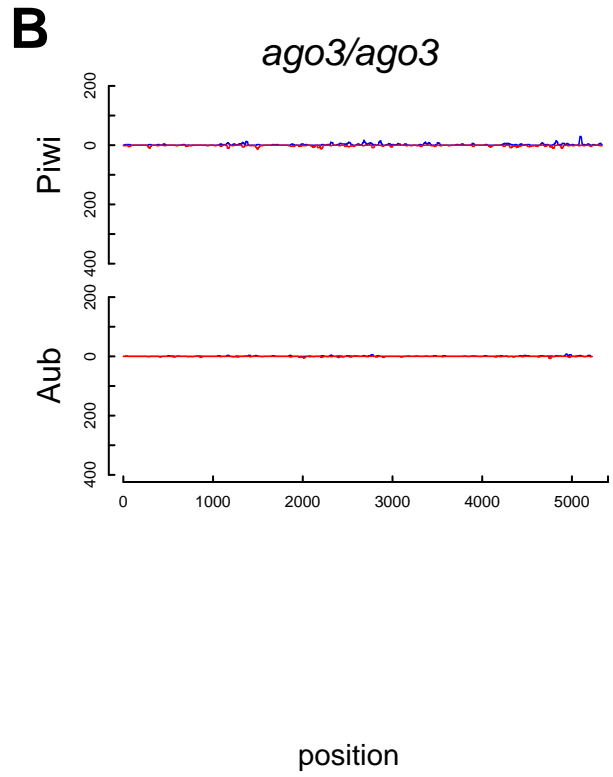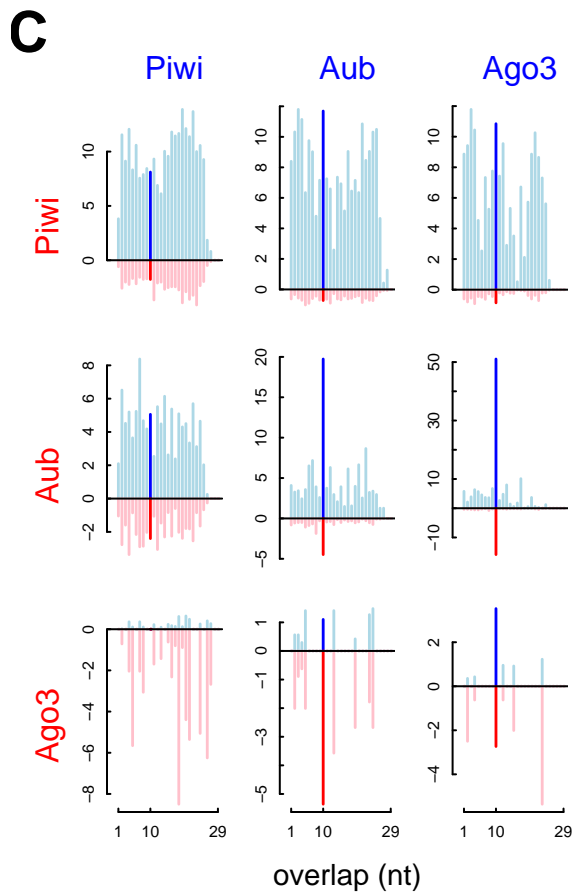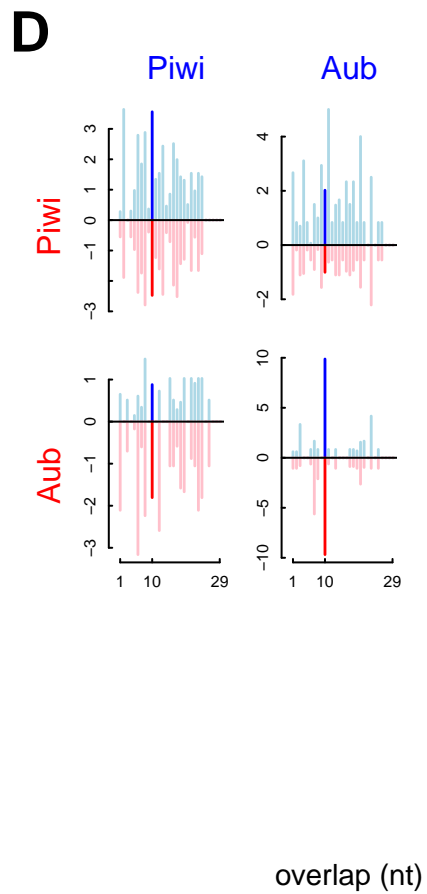

# jockey

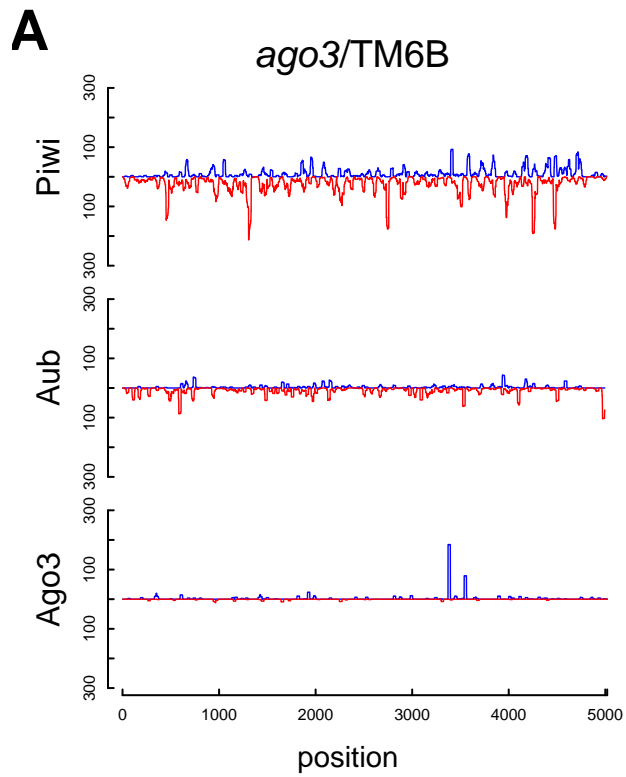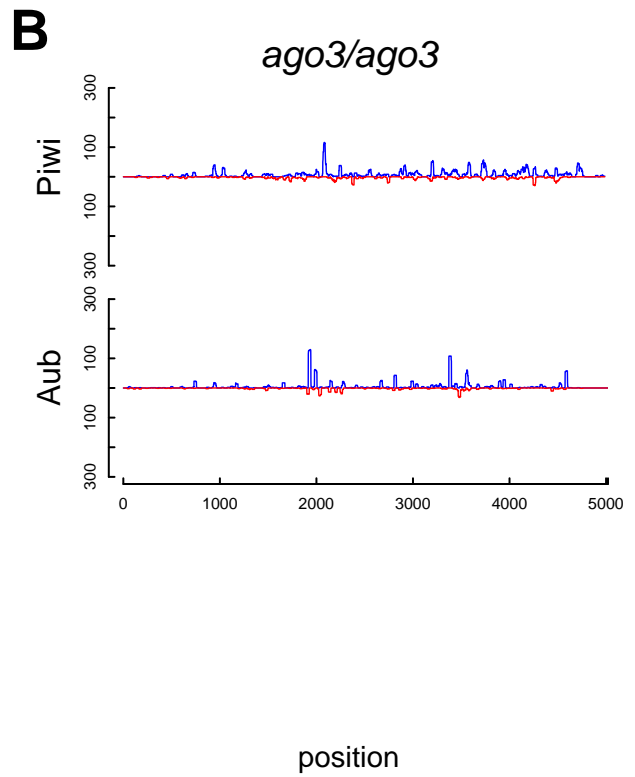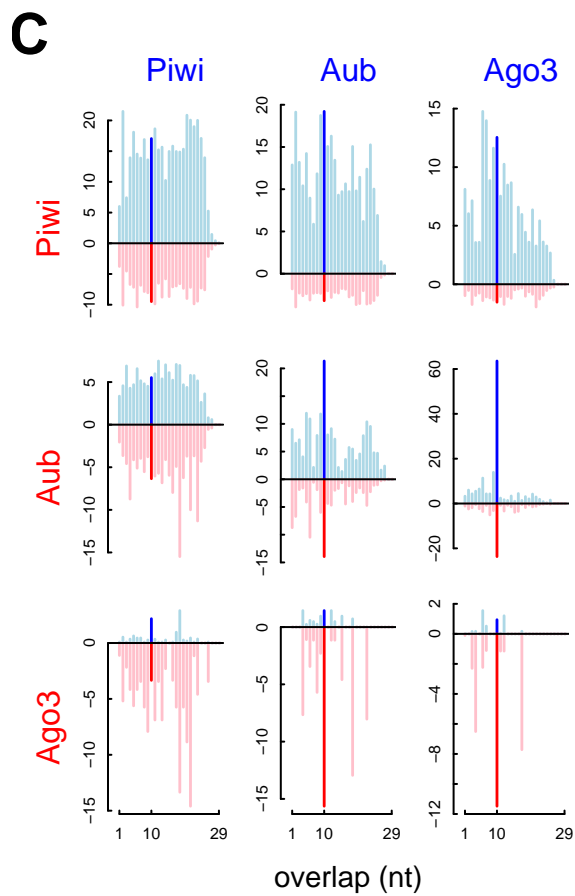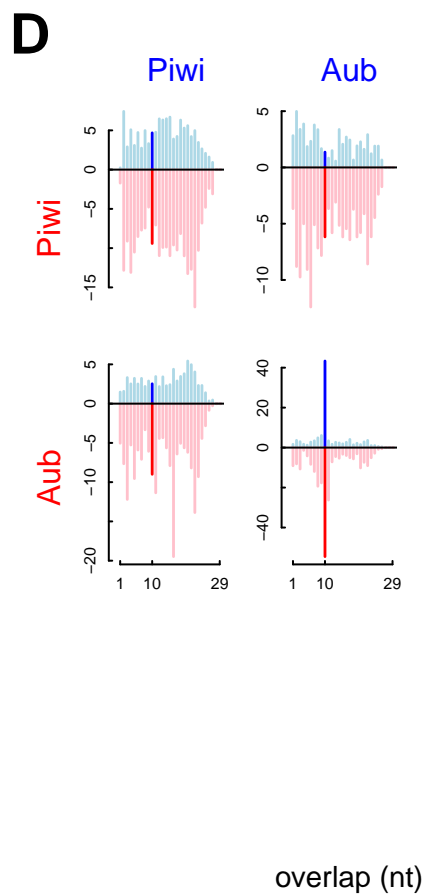

# Juan

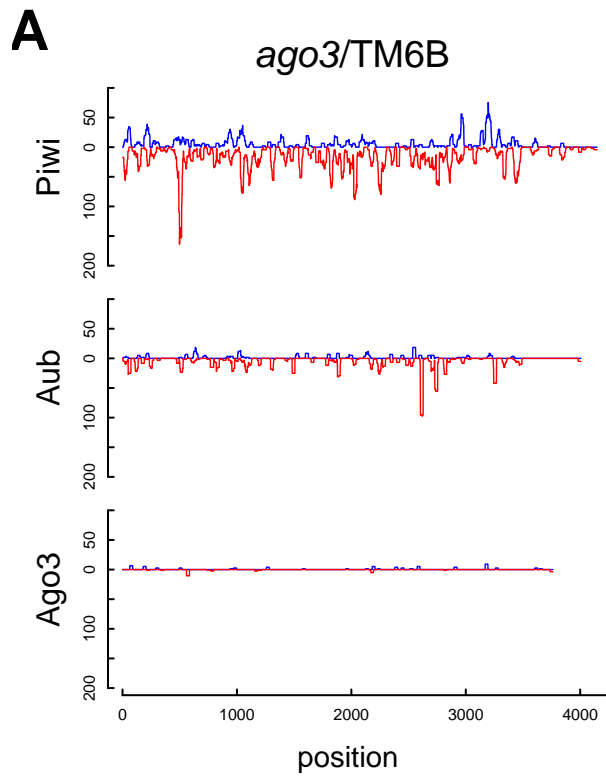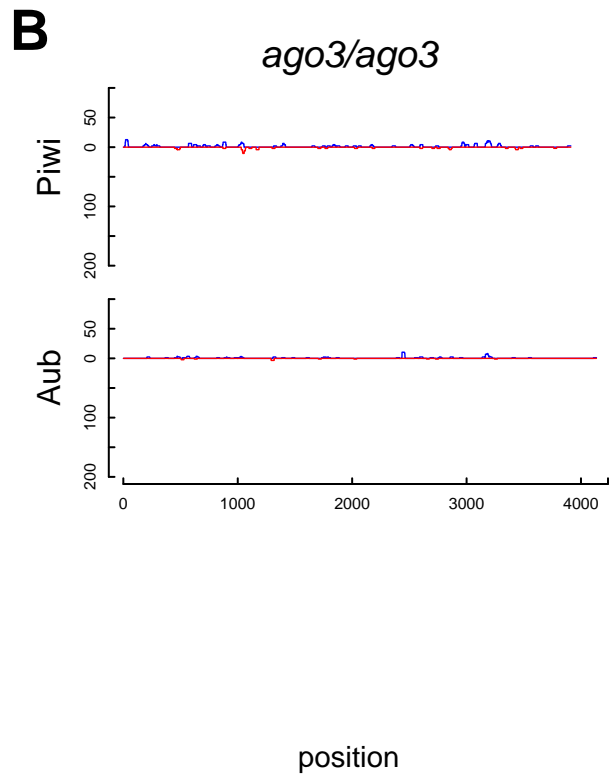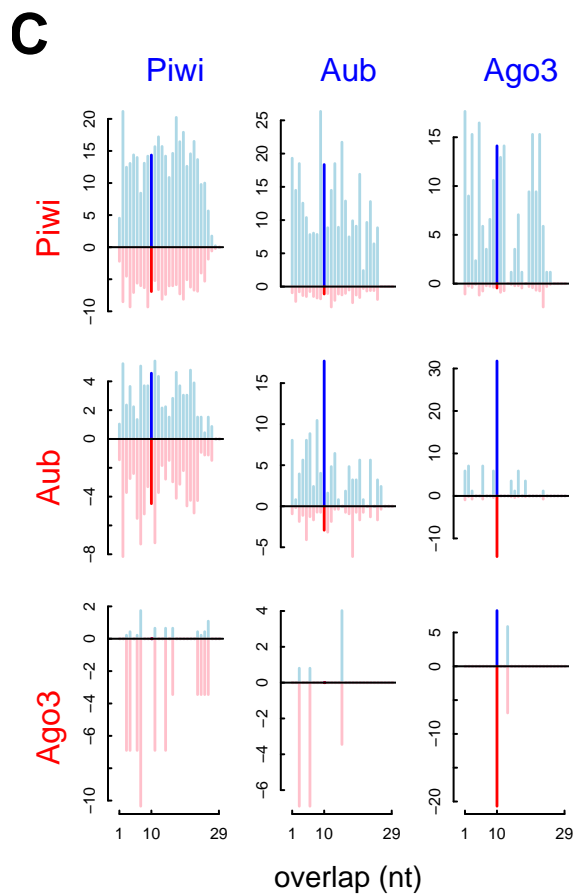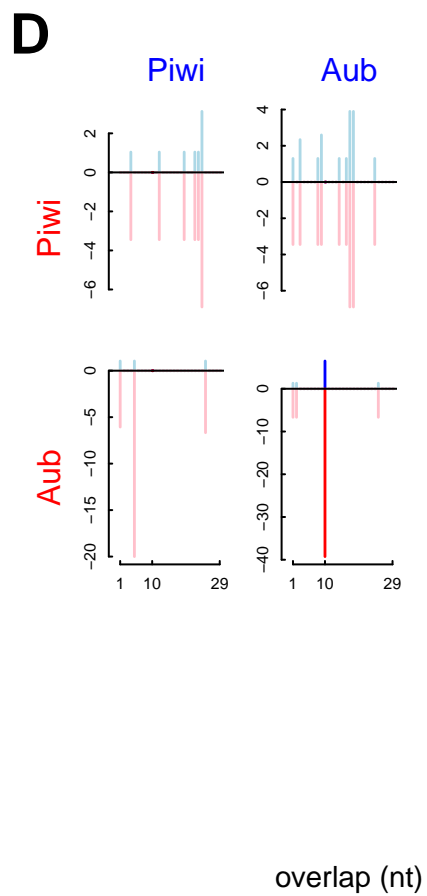

# Max element

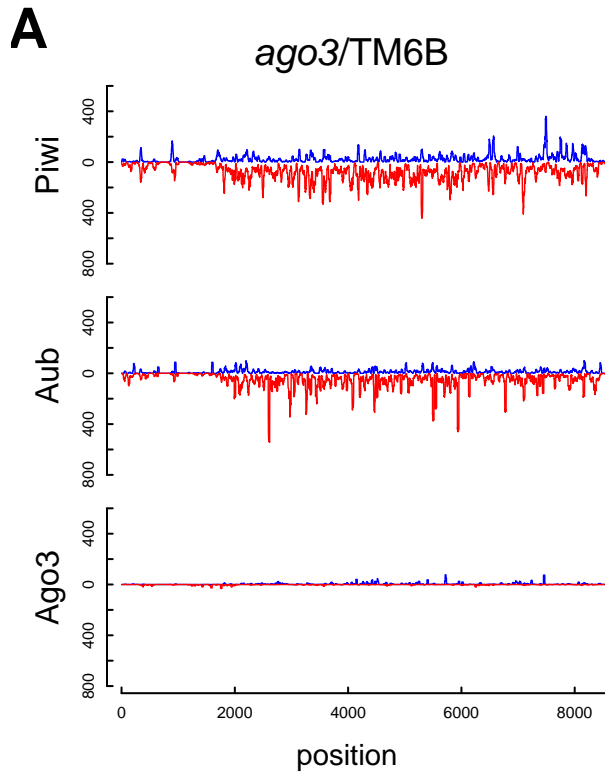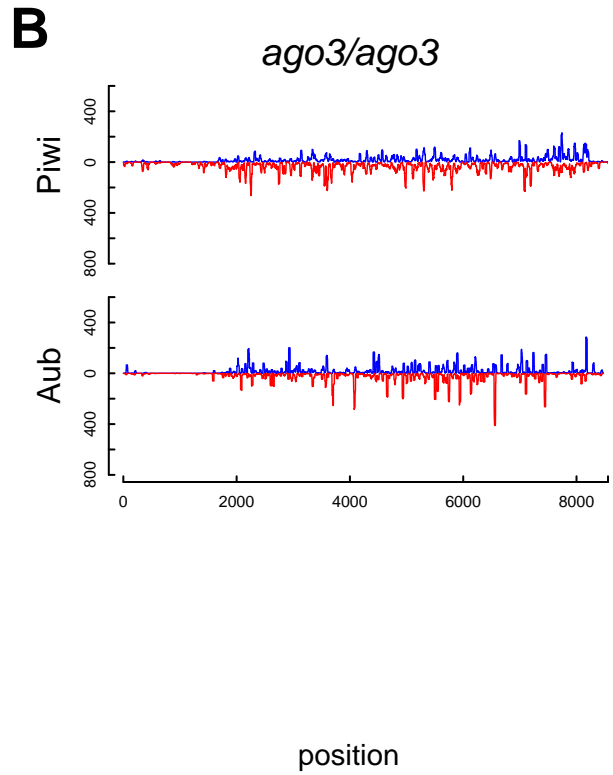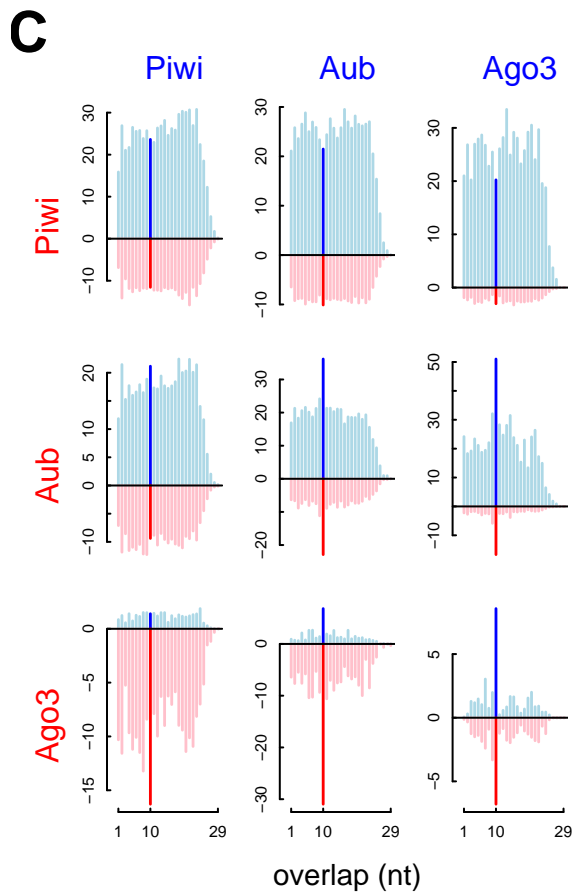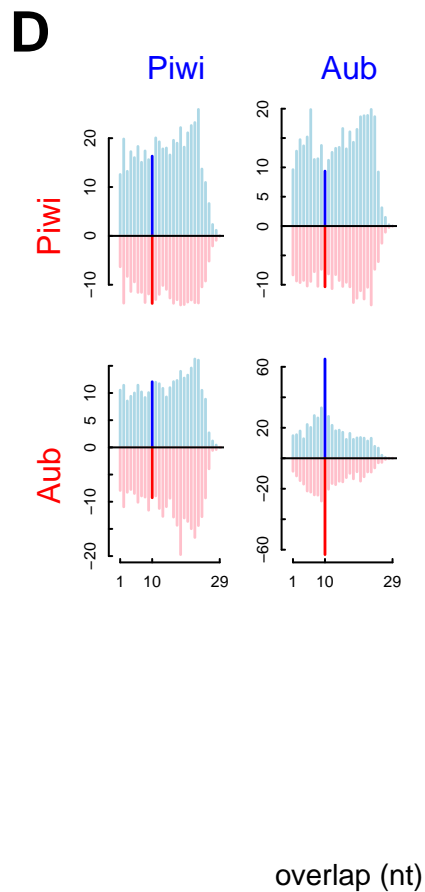

# McClintock

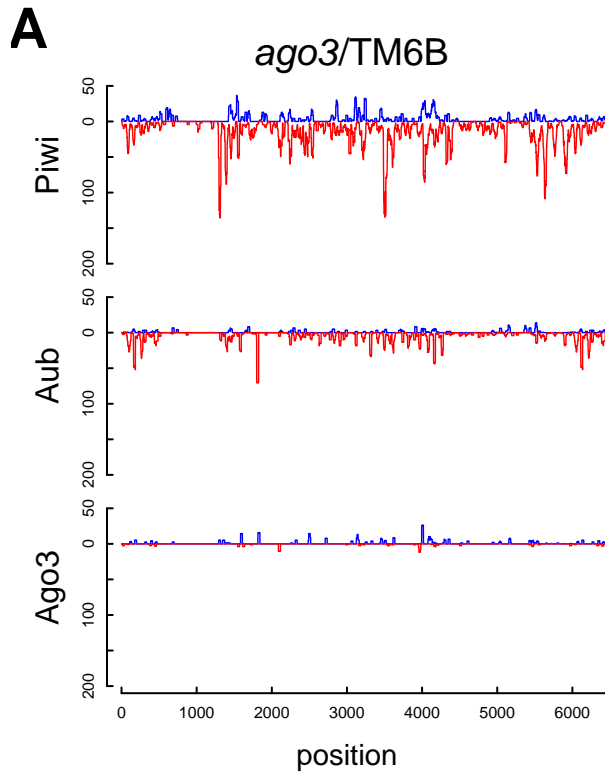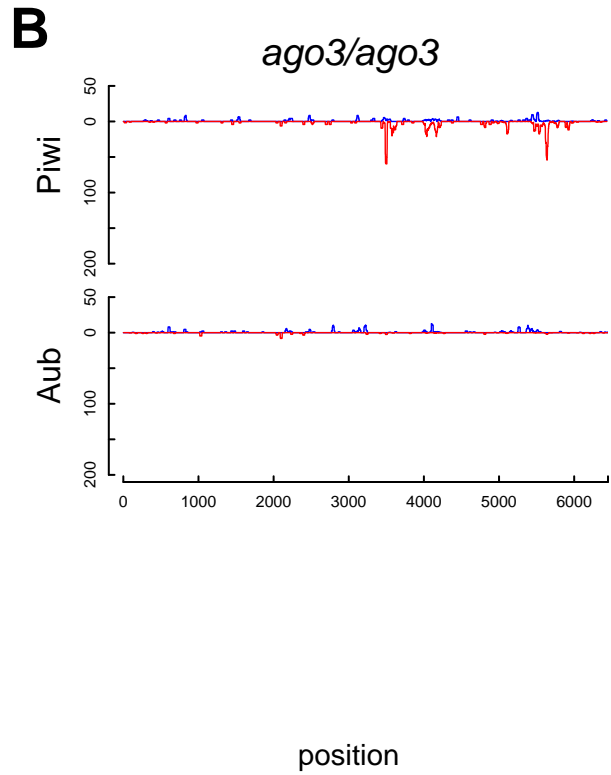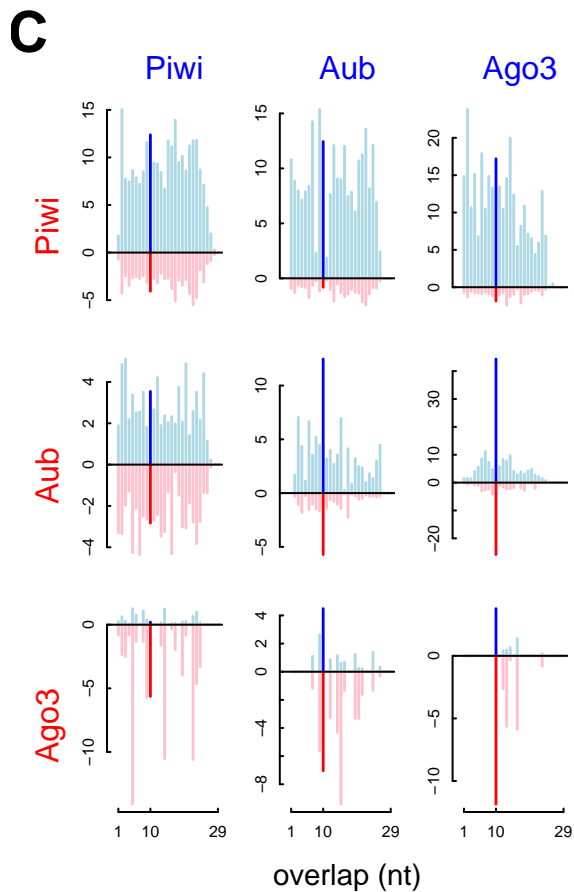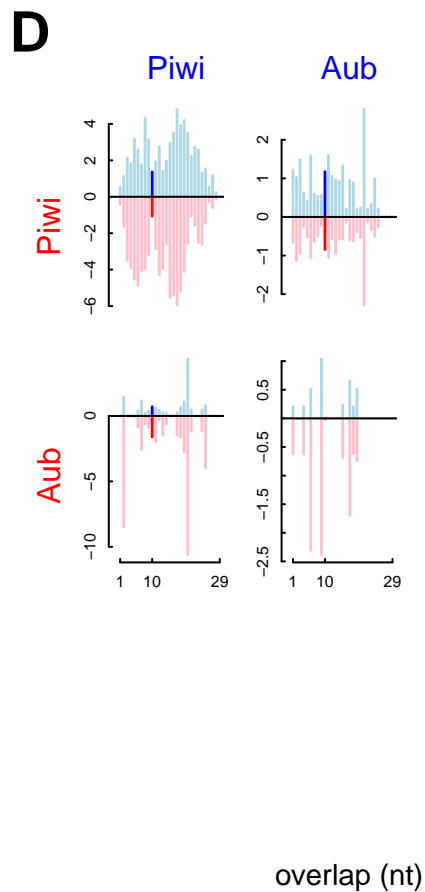

# *mdg1*

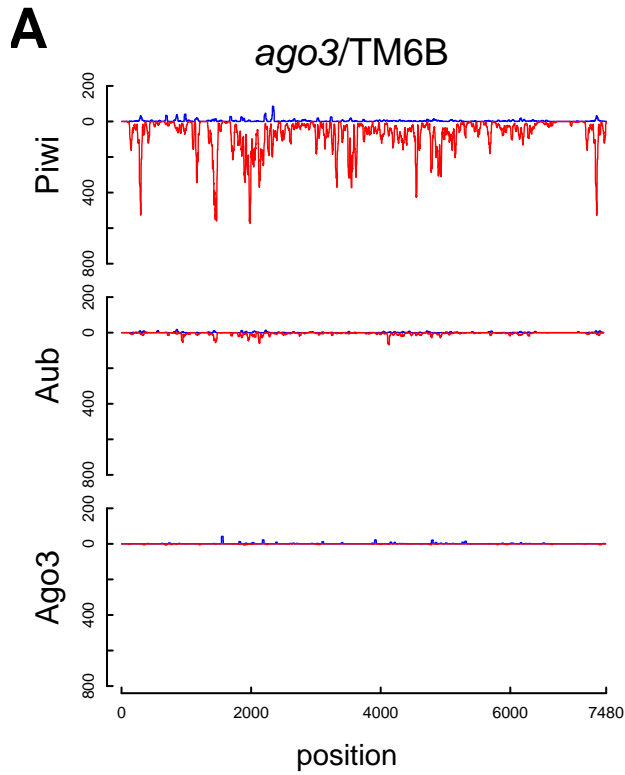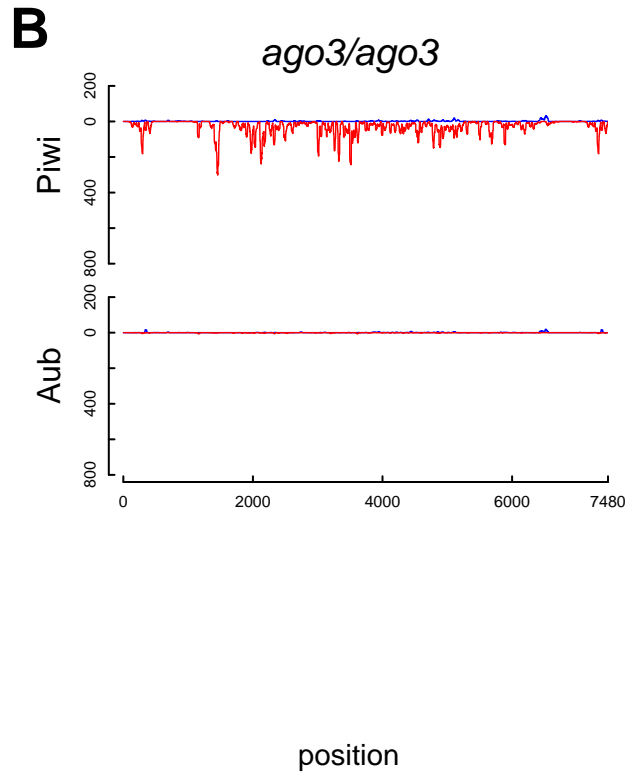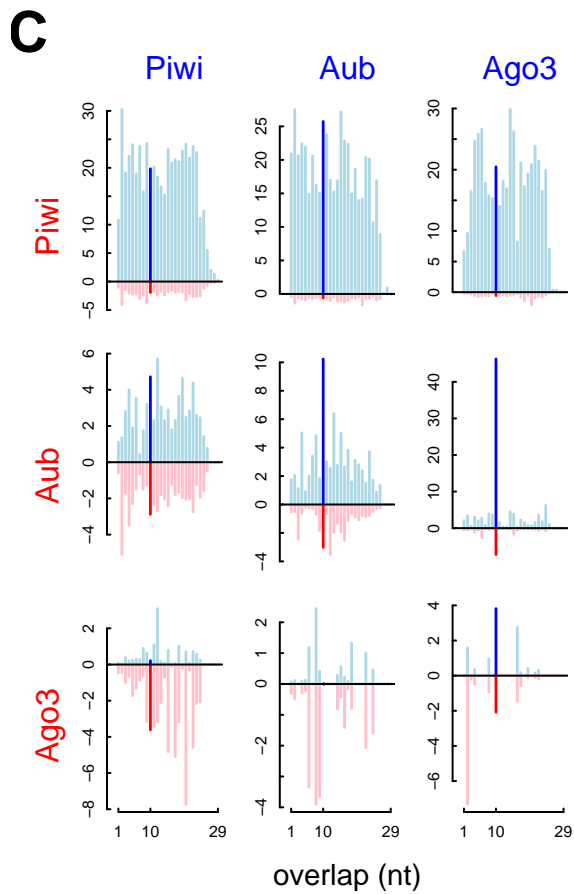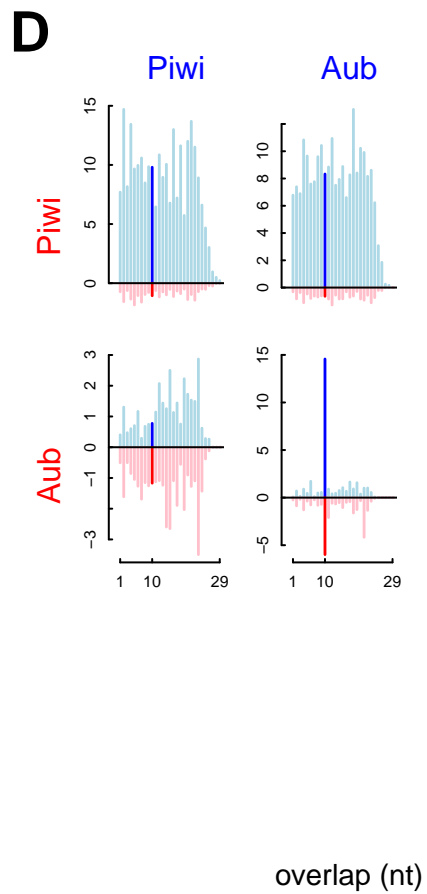

# *mdg3*

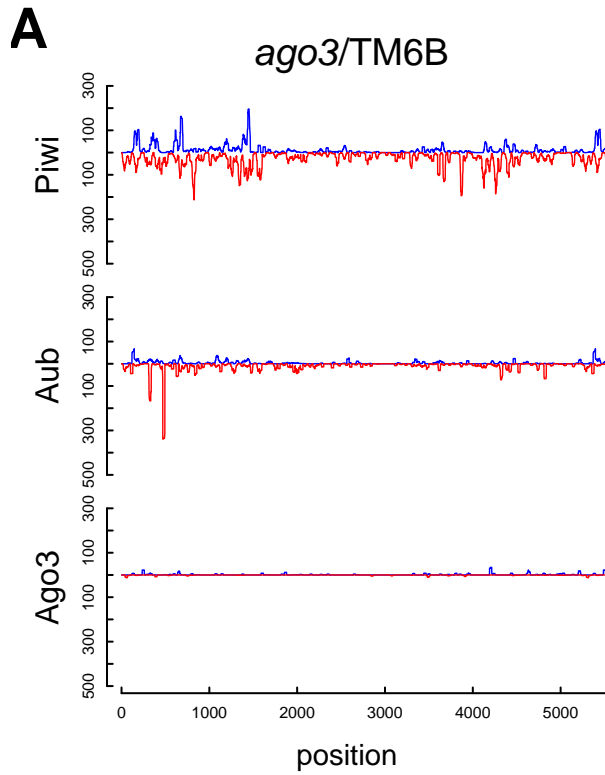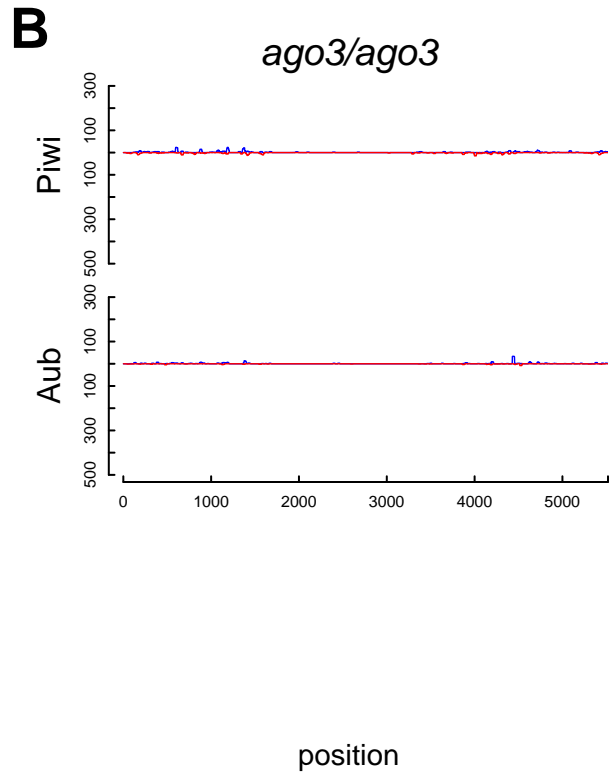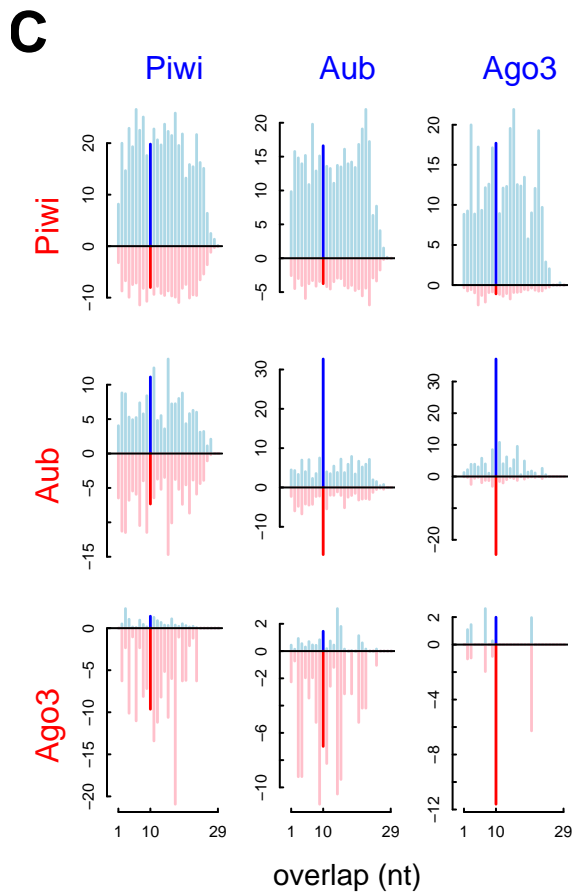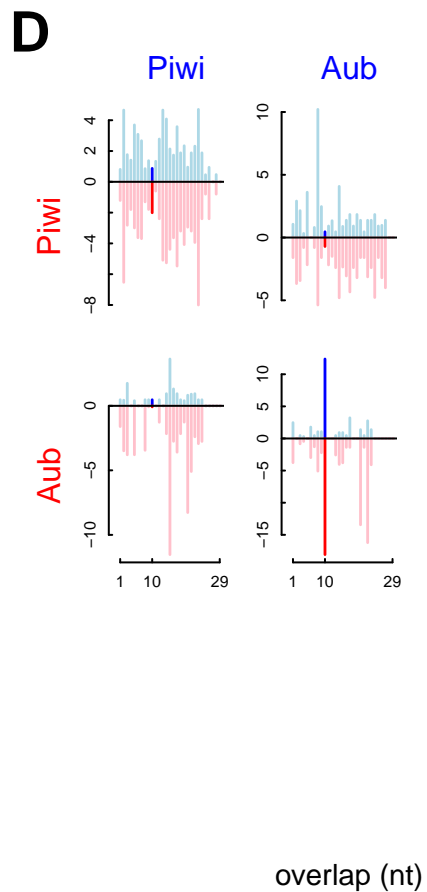

# *micropia*

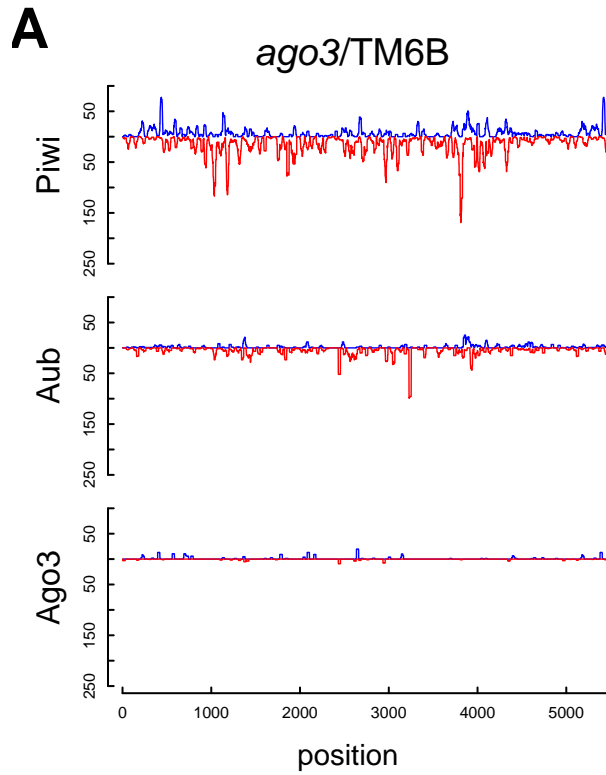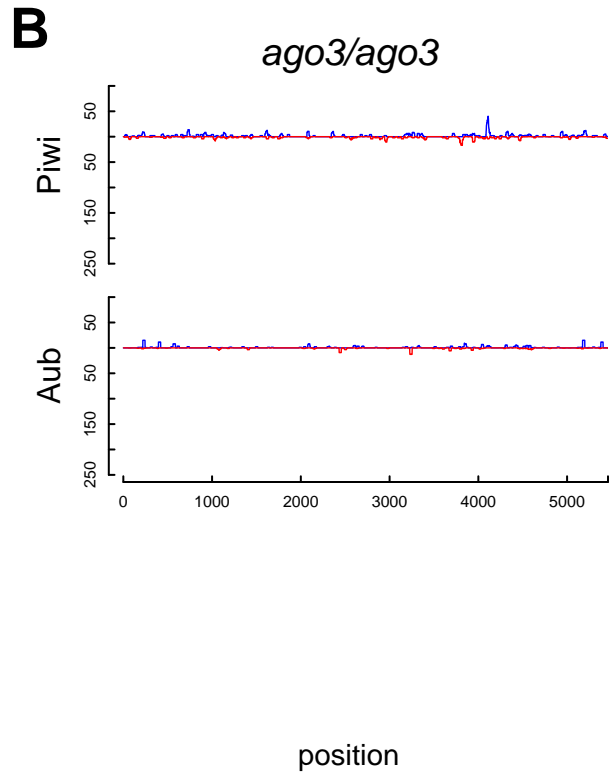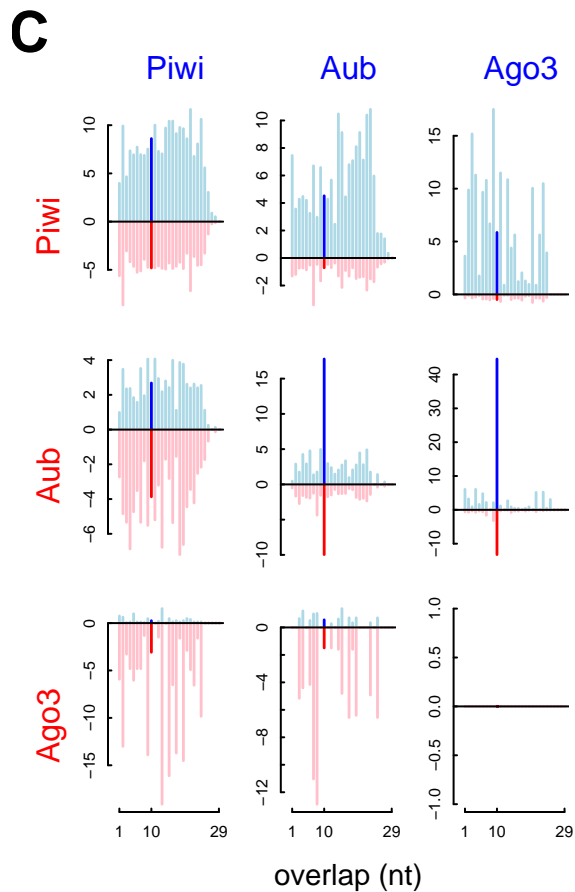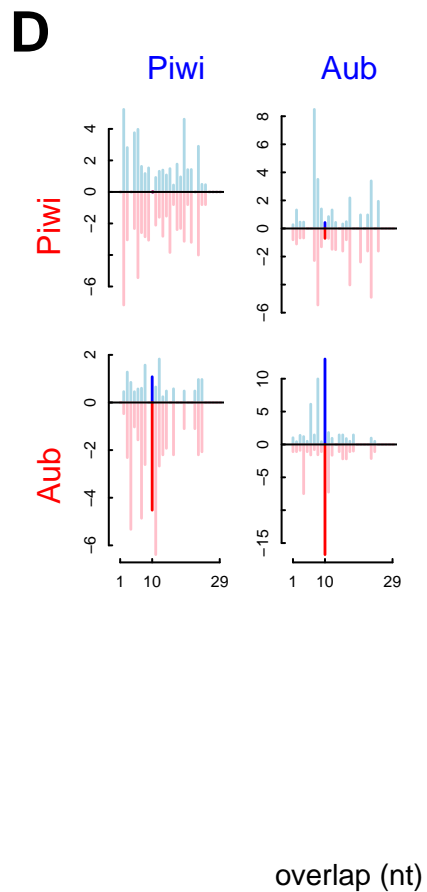



# *mst40*

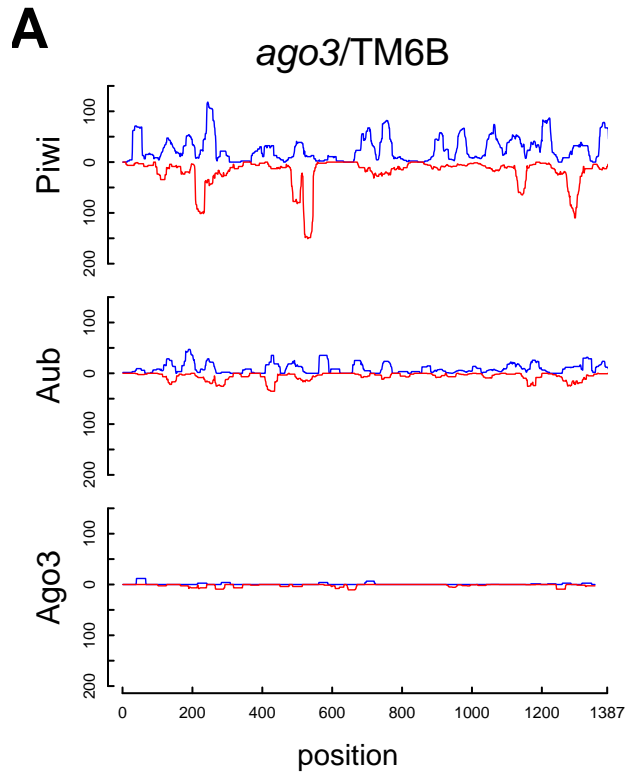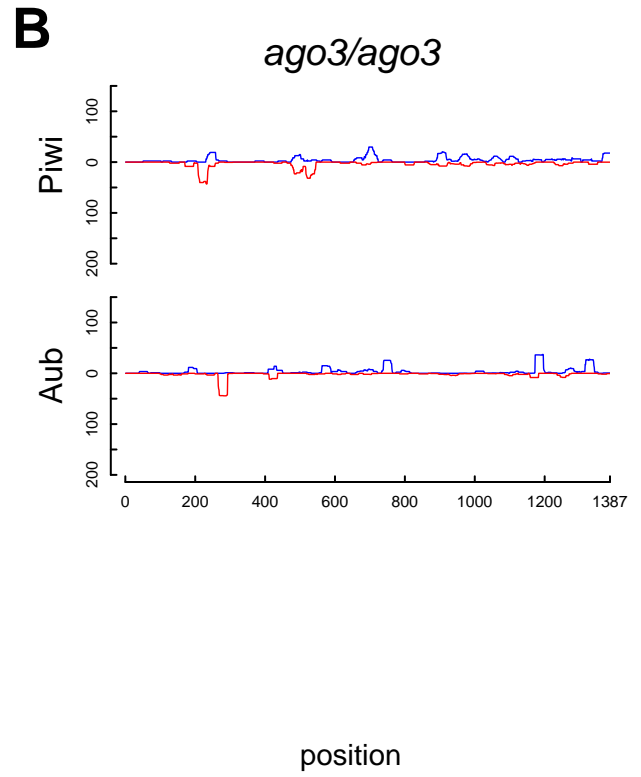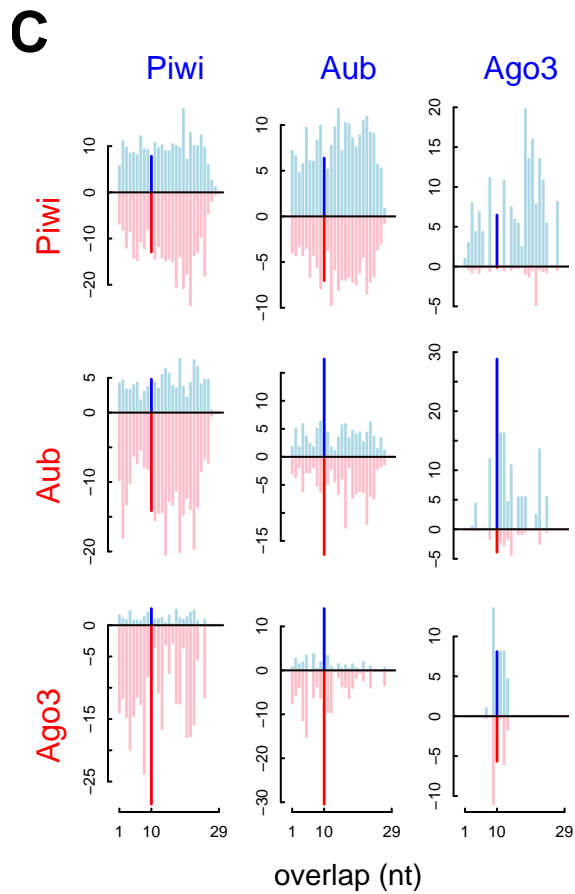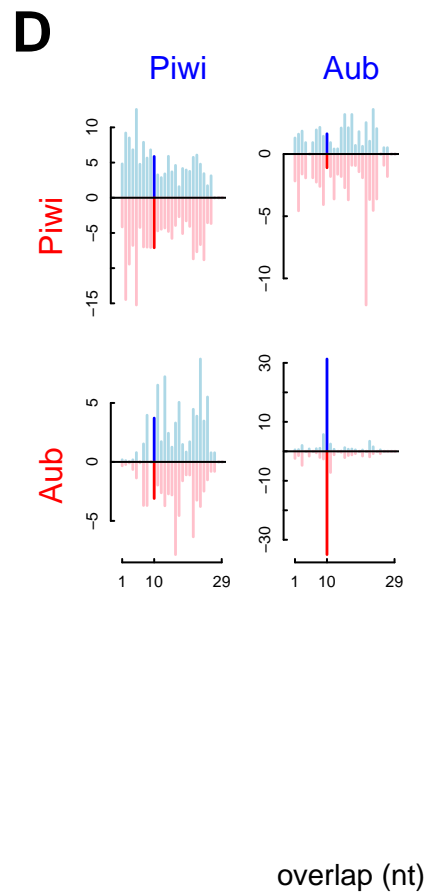

# NOF

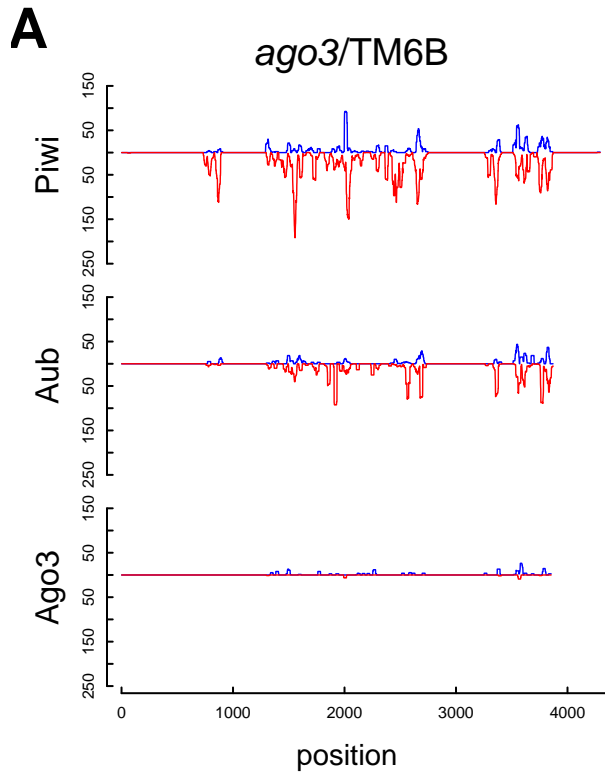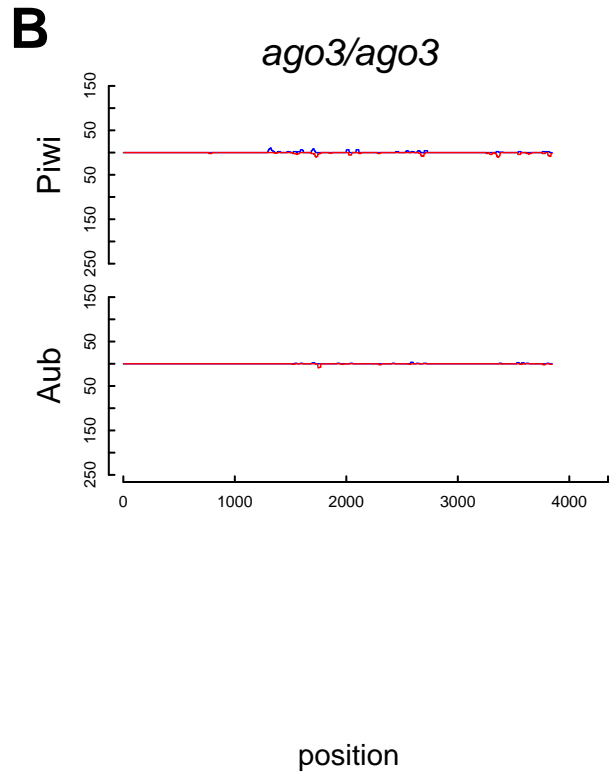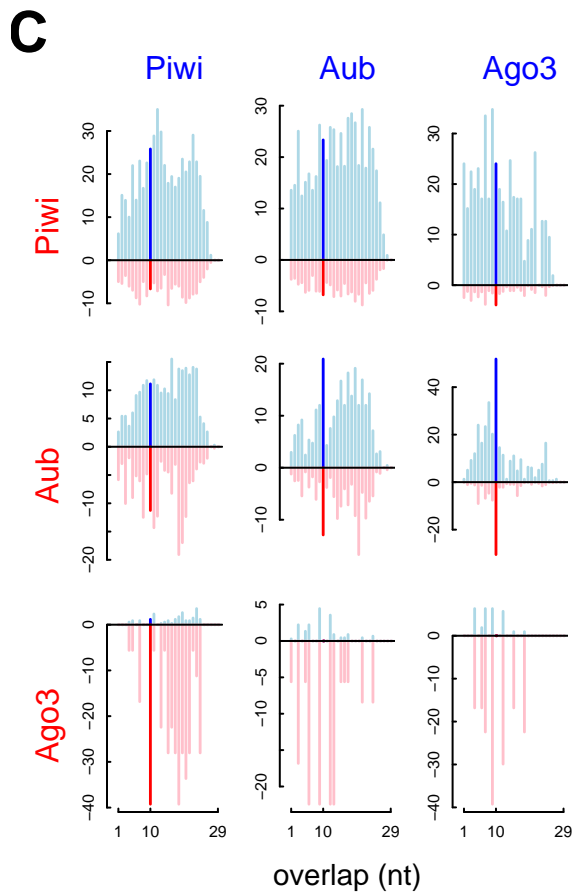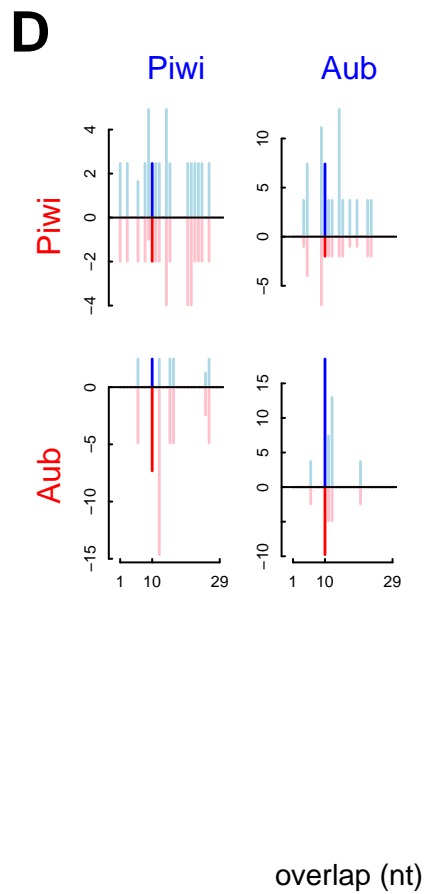

# opus

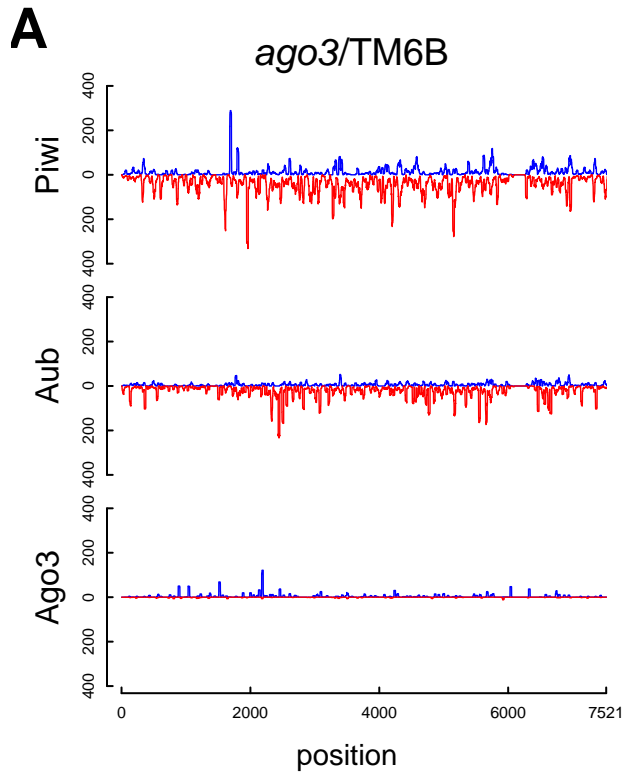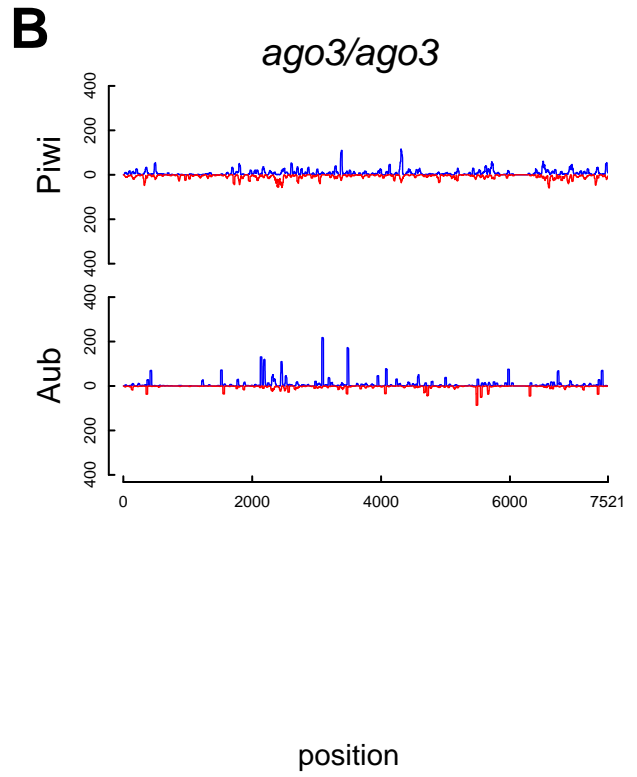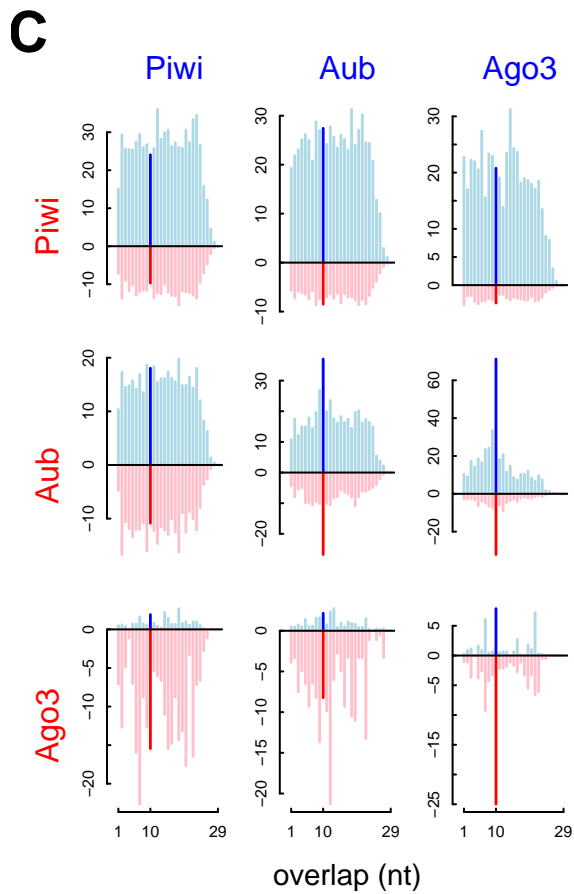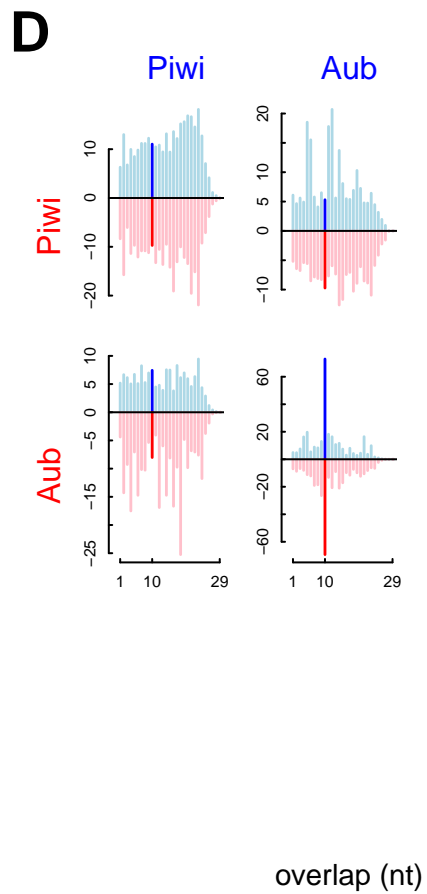

# Osvaldo

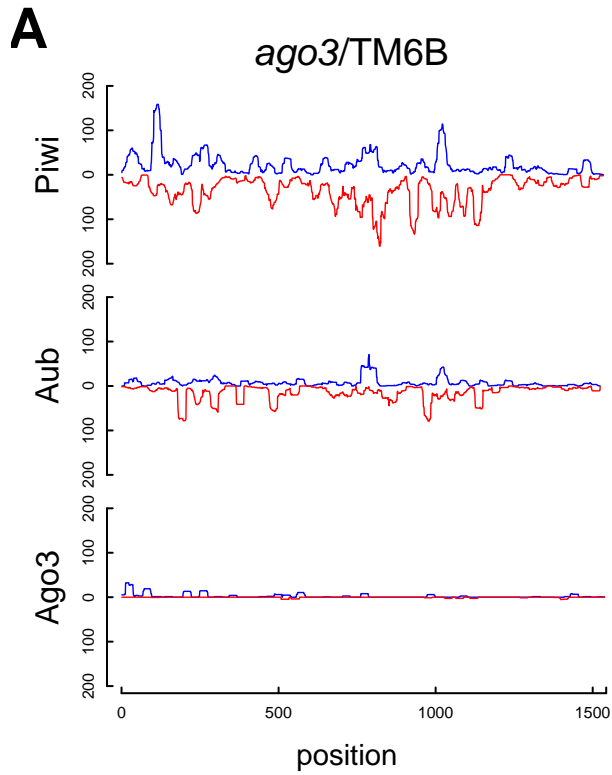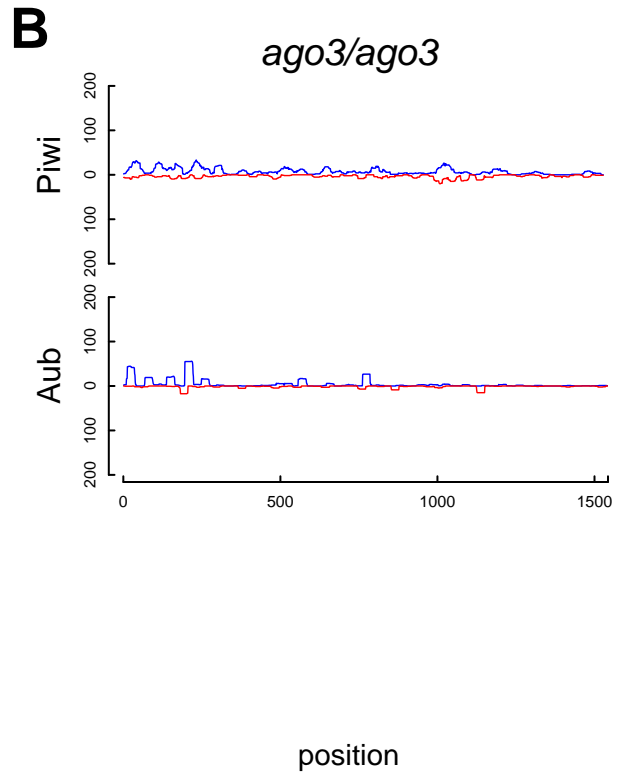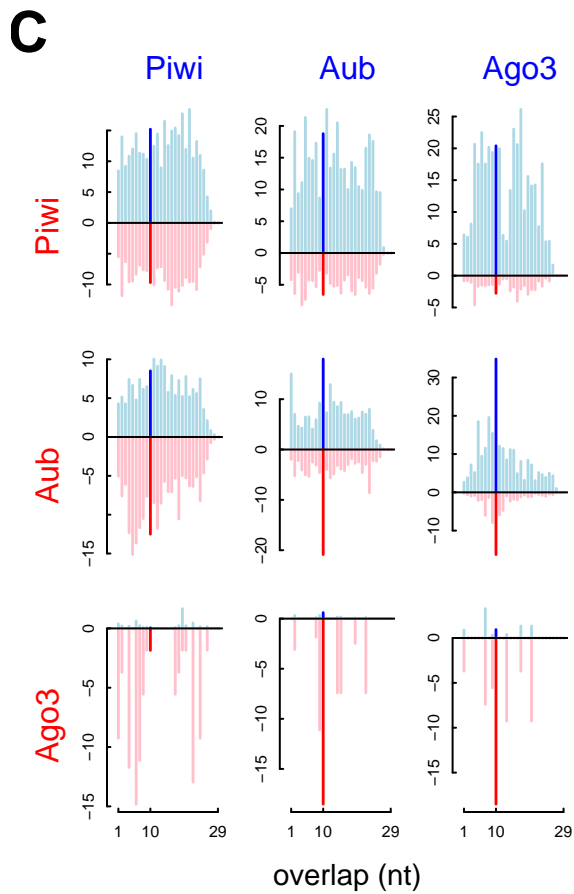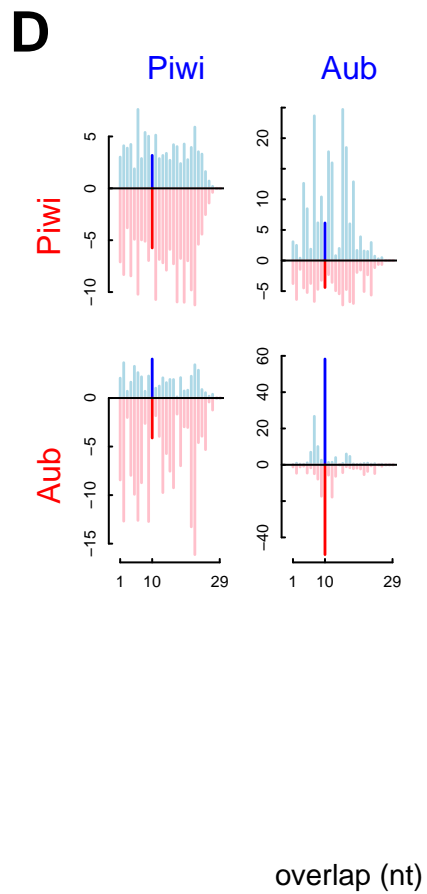

# Porto1

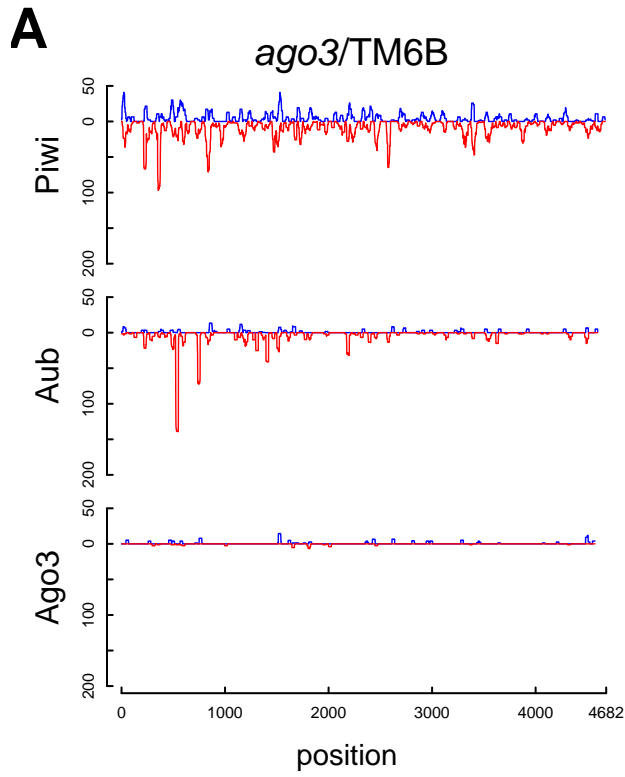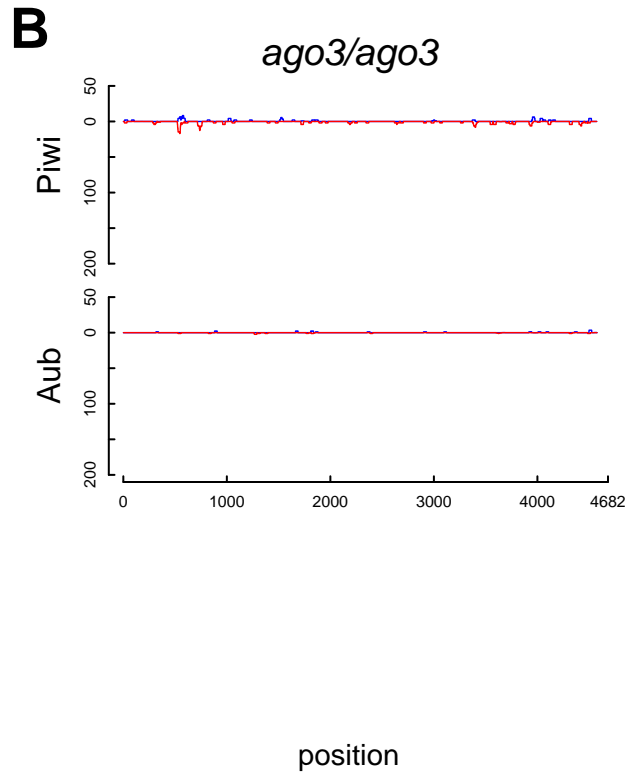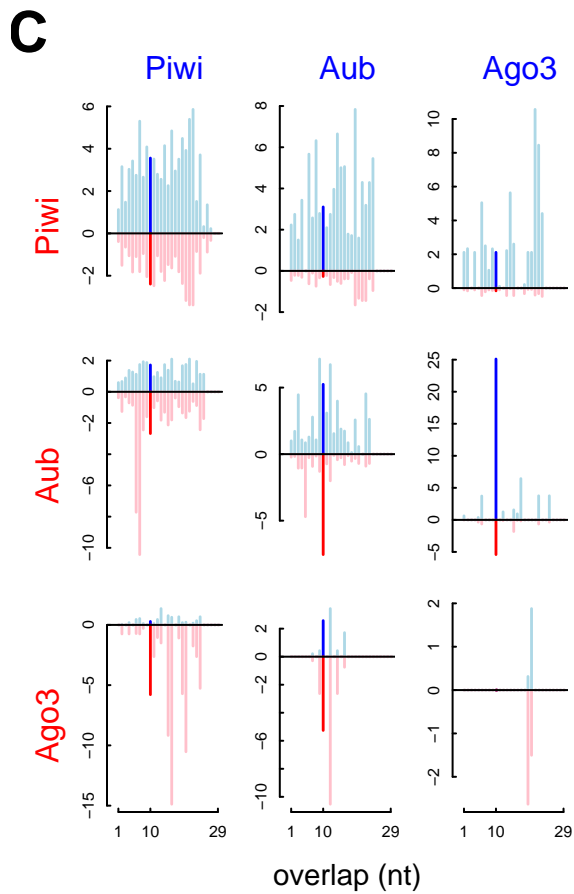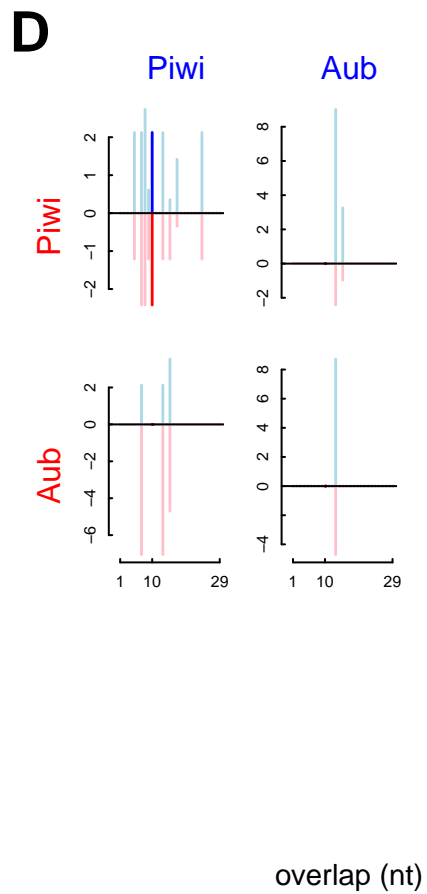

# Q element

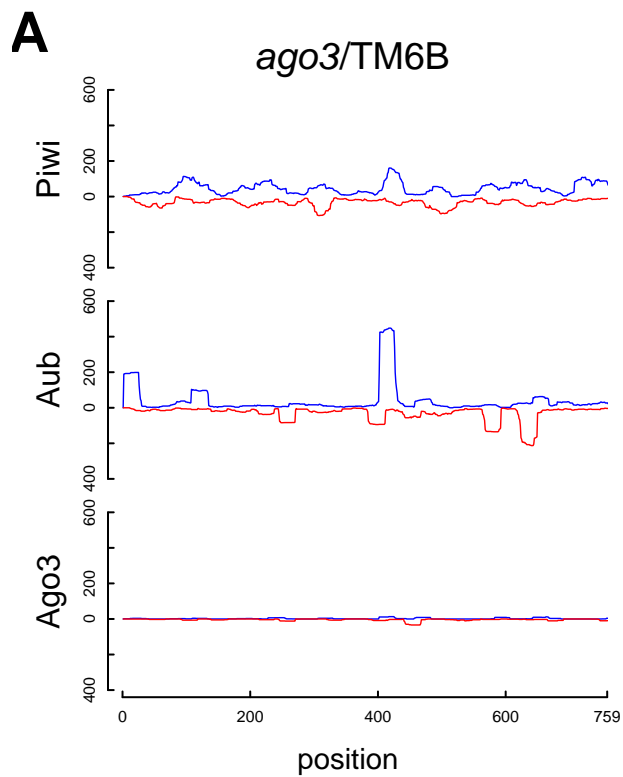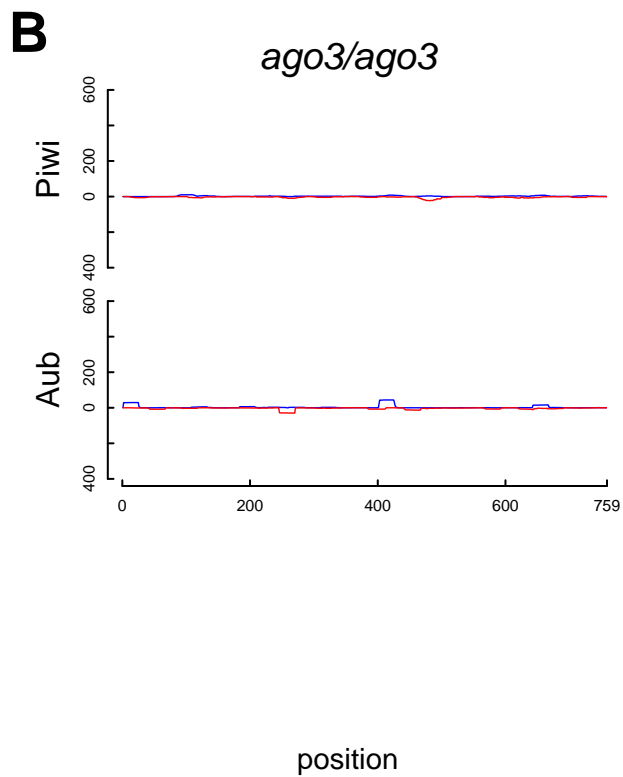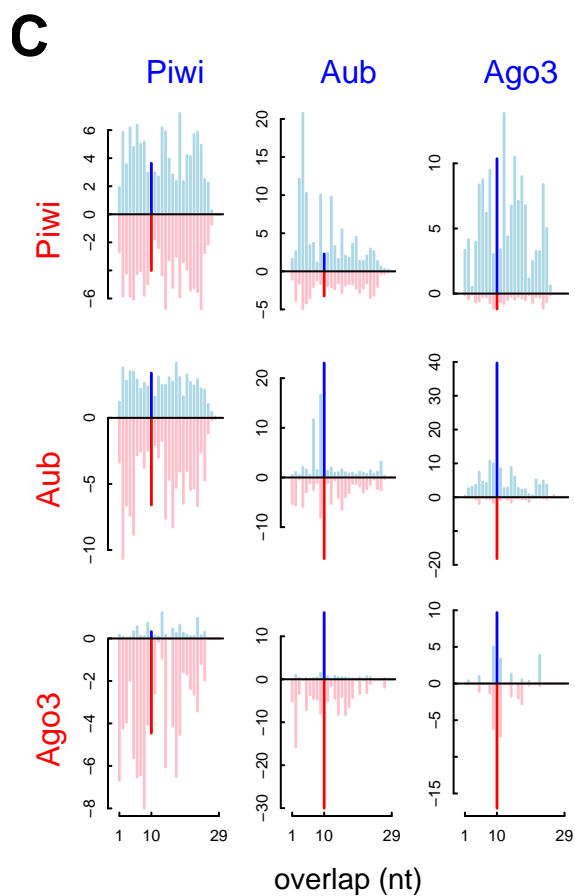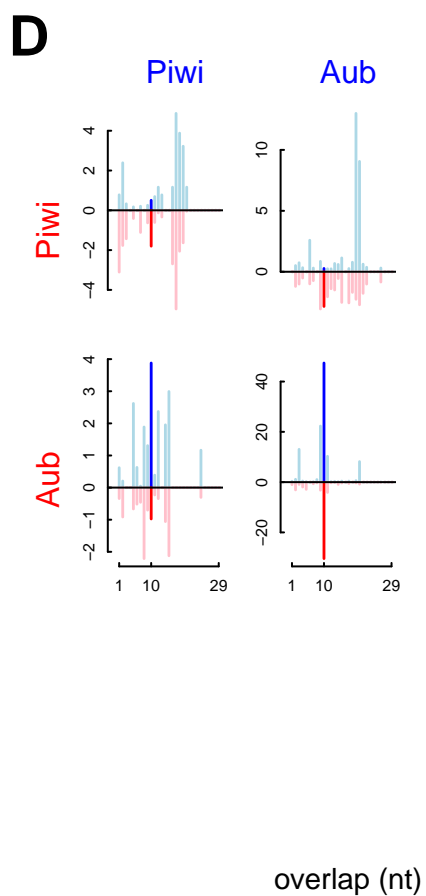

# Quasimodo

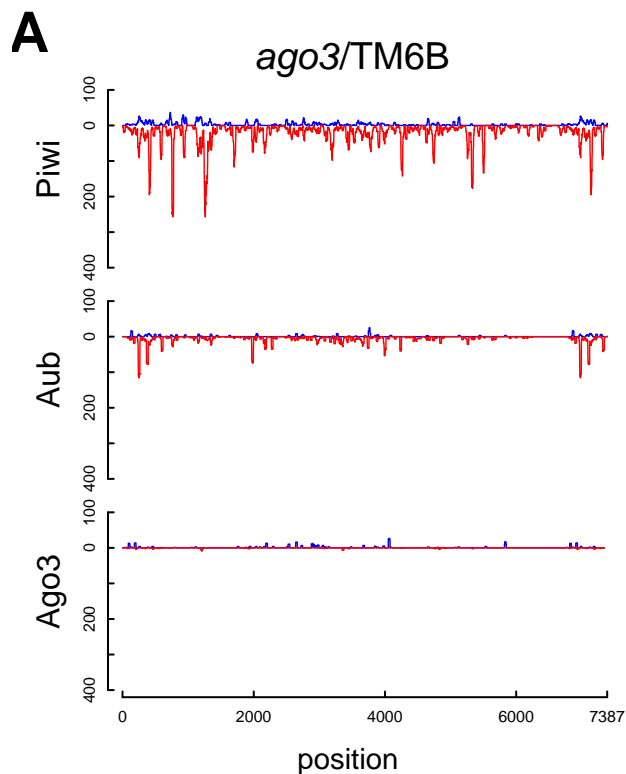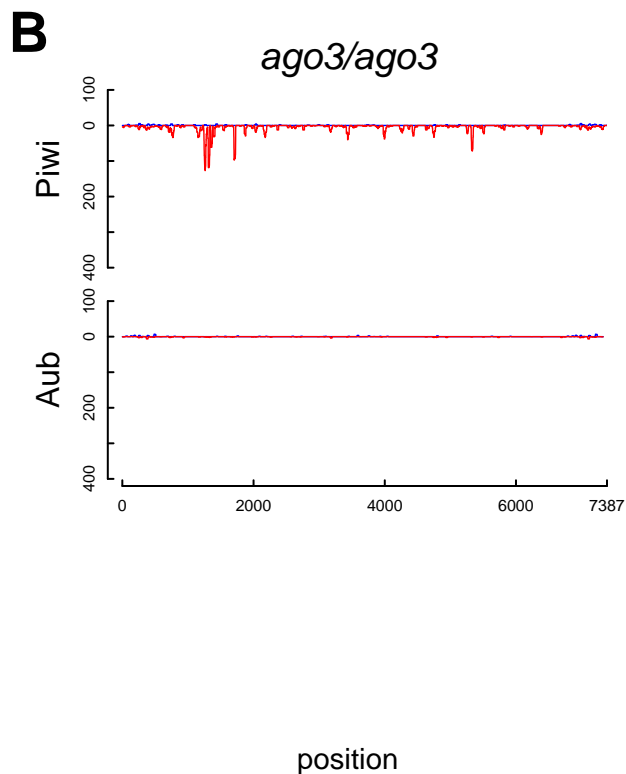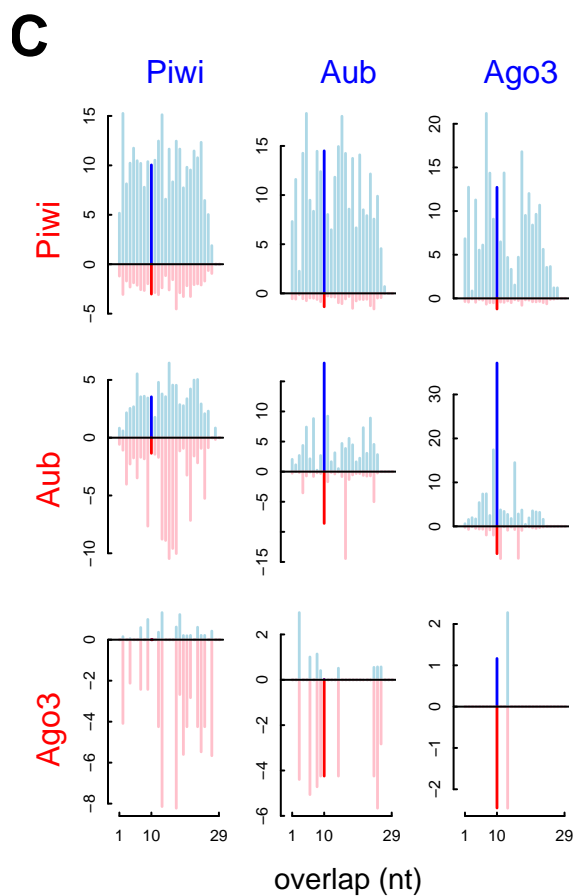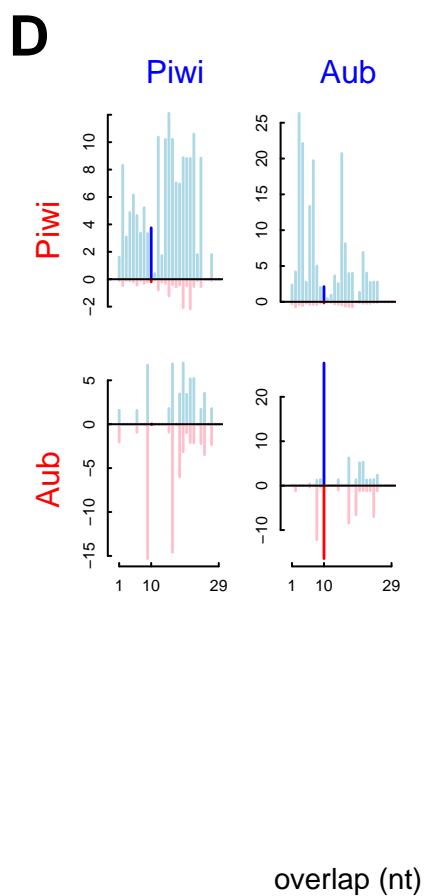

# R1 2

**A**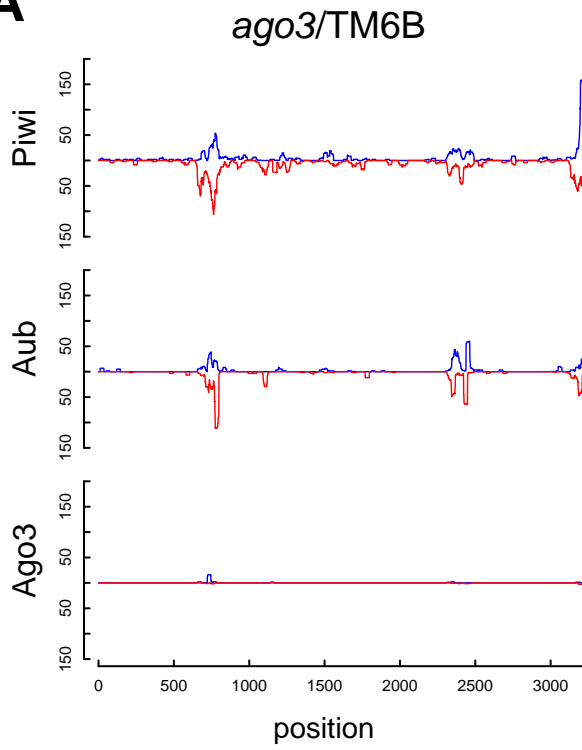**B**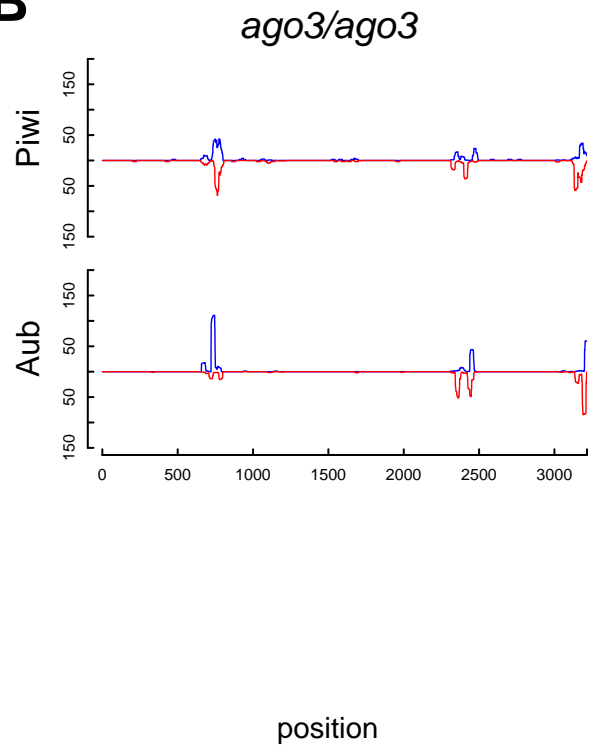**C**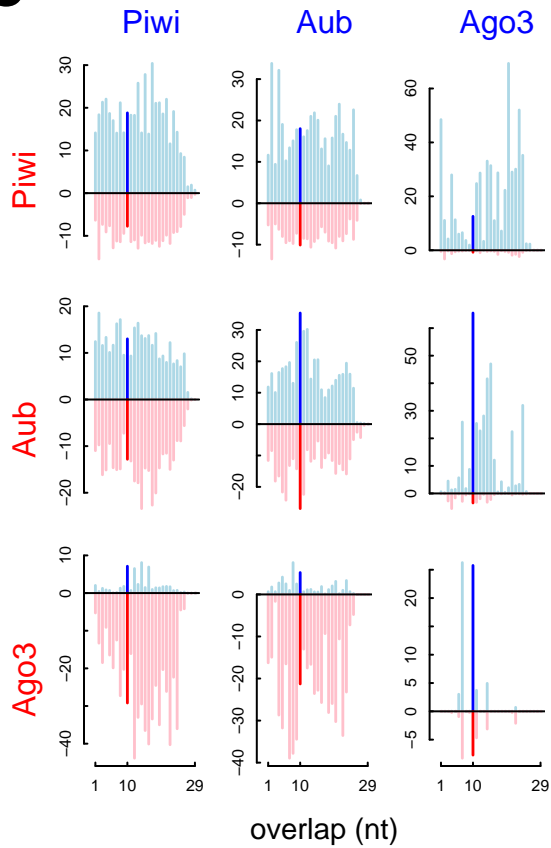**D**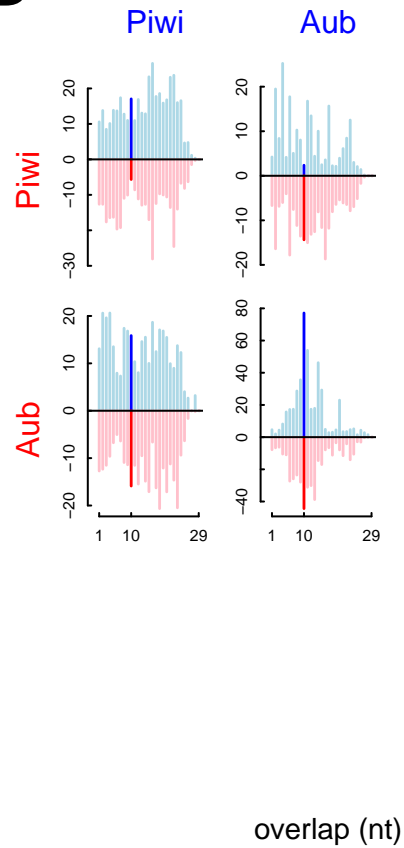



# R1A1 element

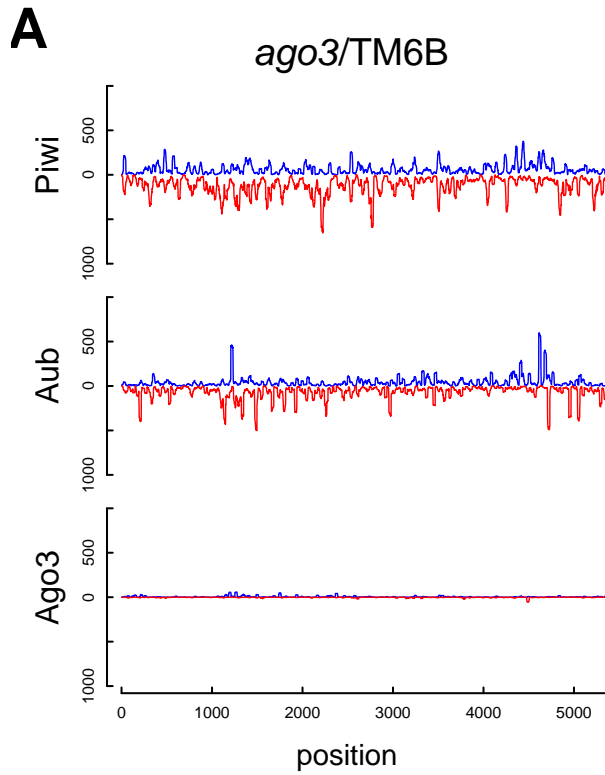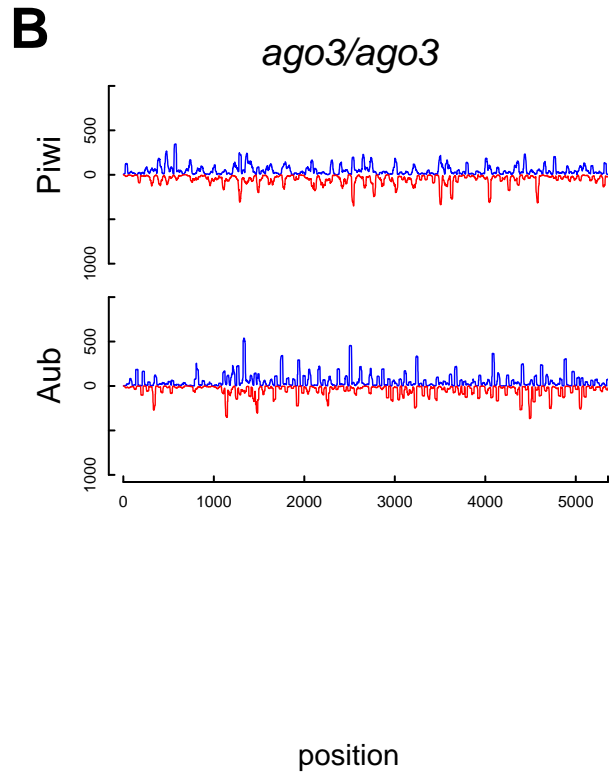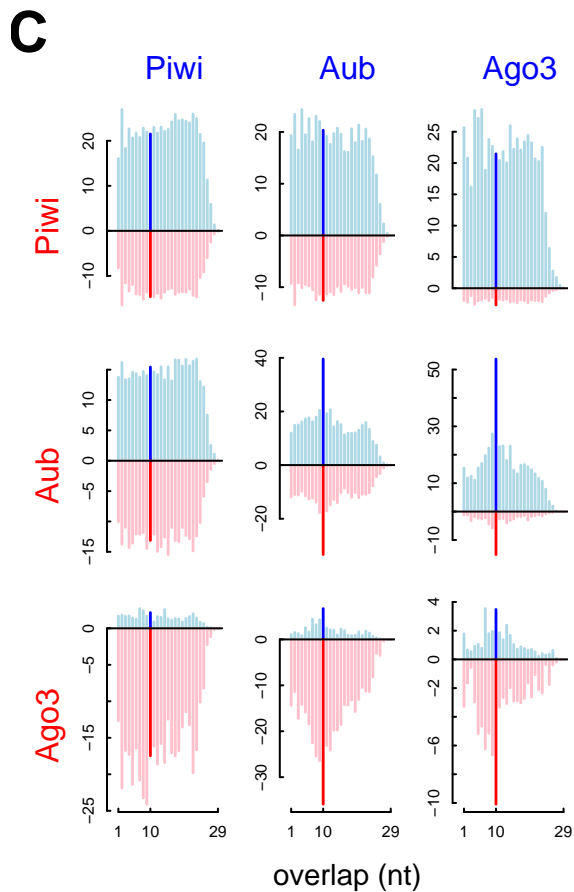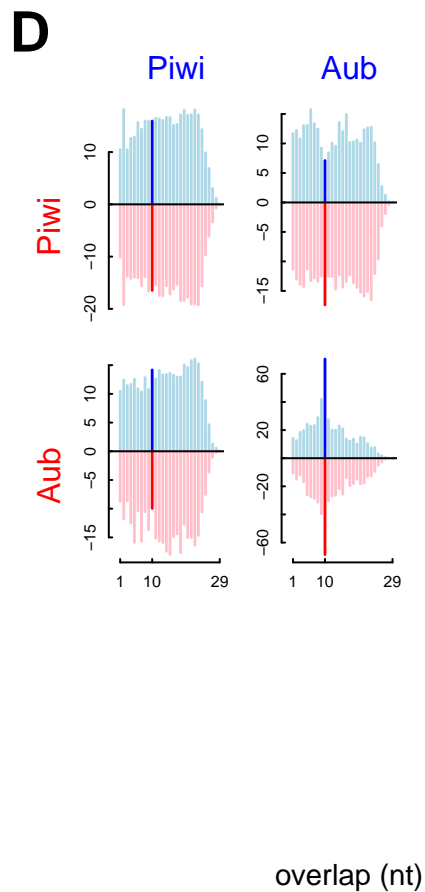

# R2 element

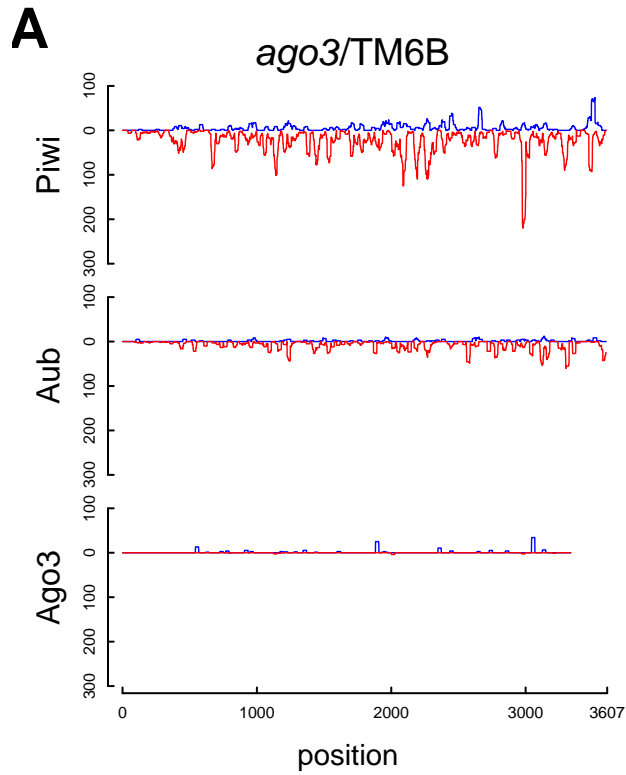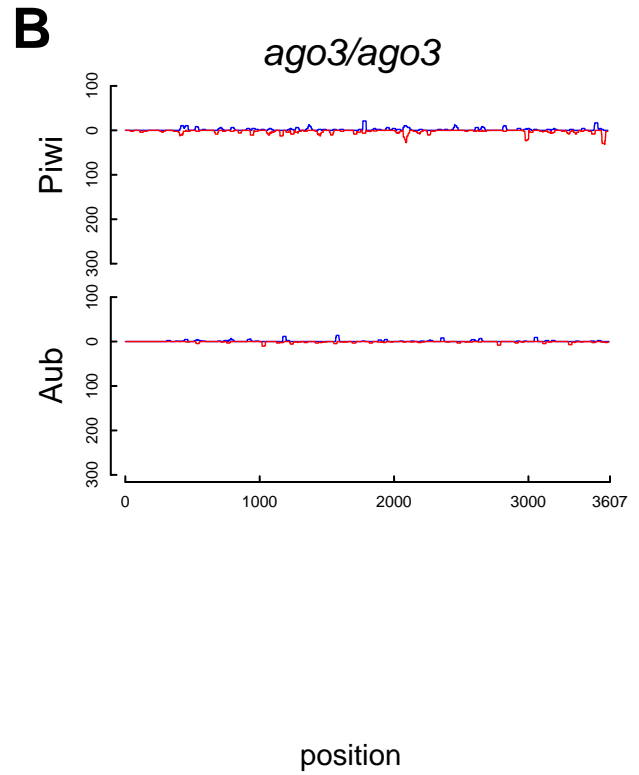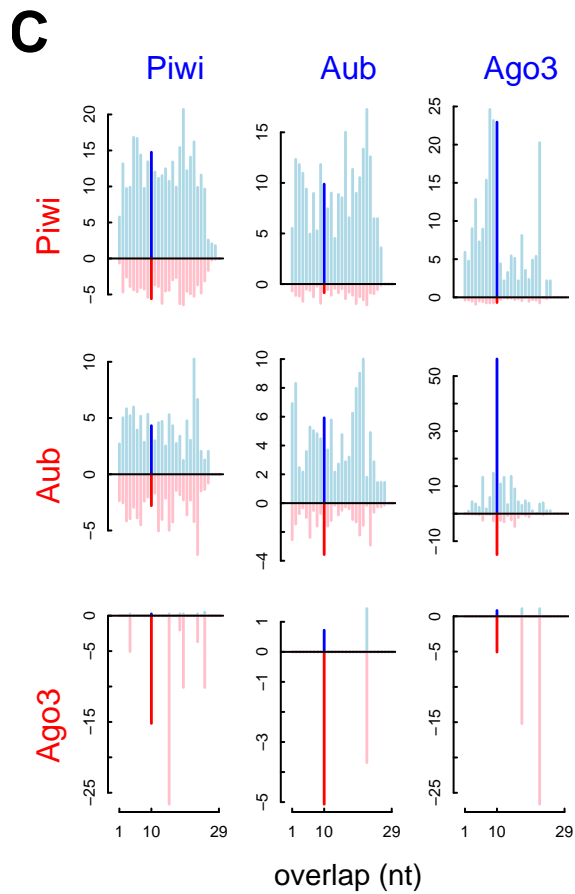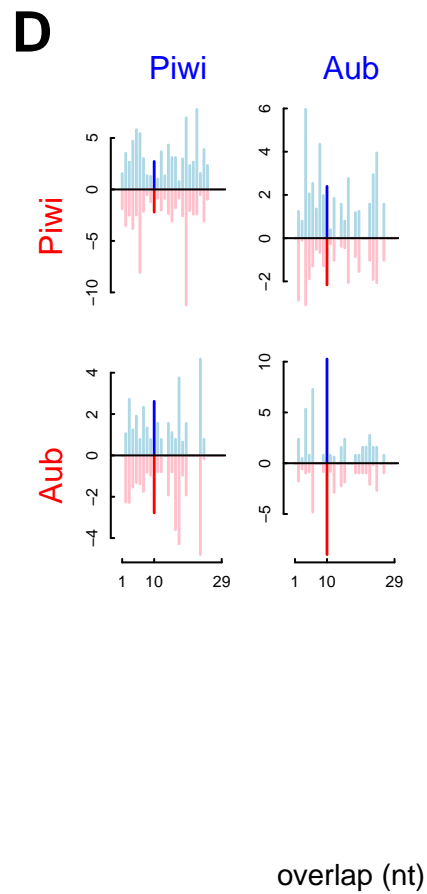

# roo

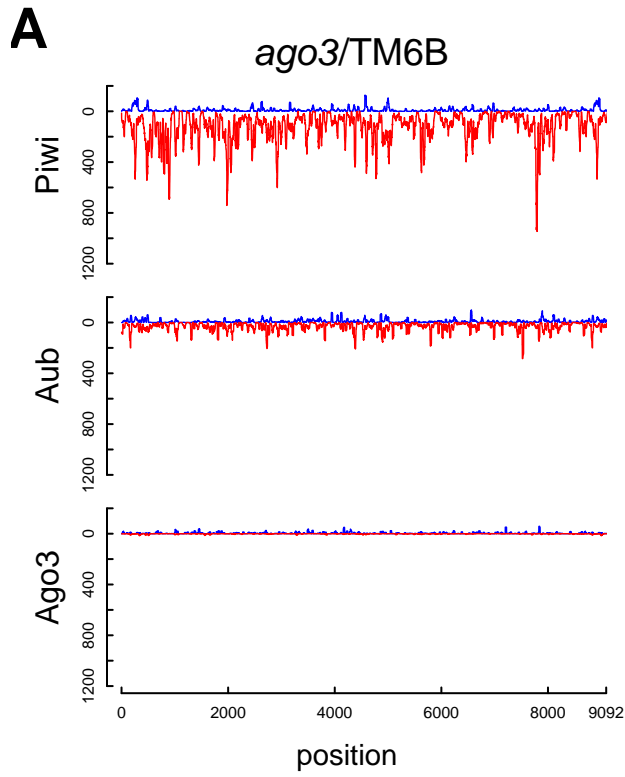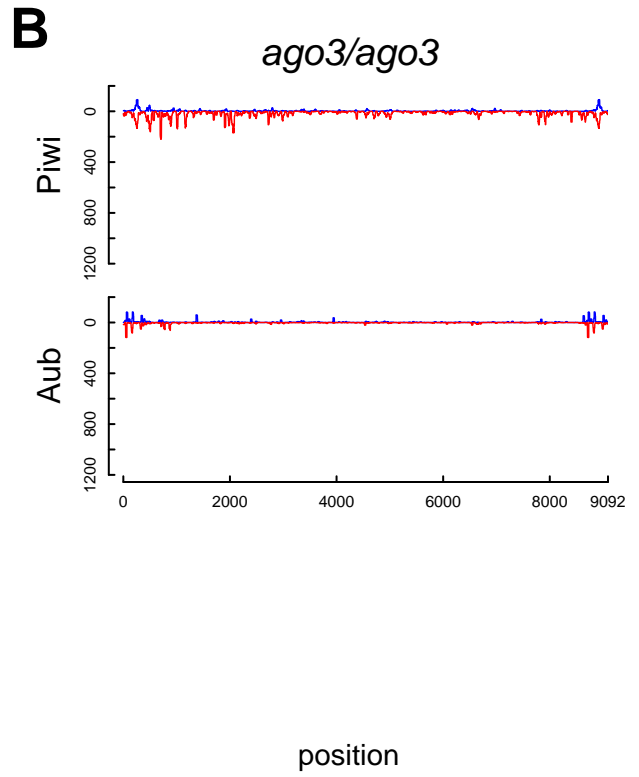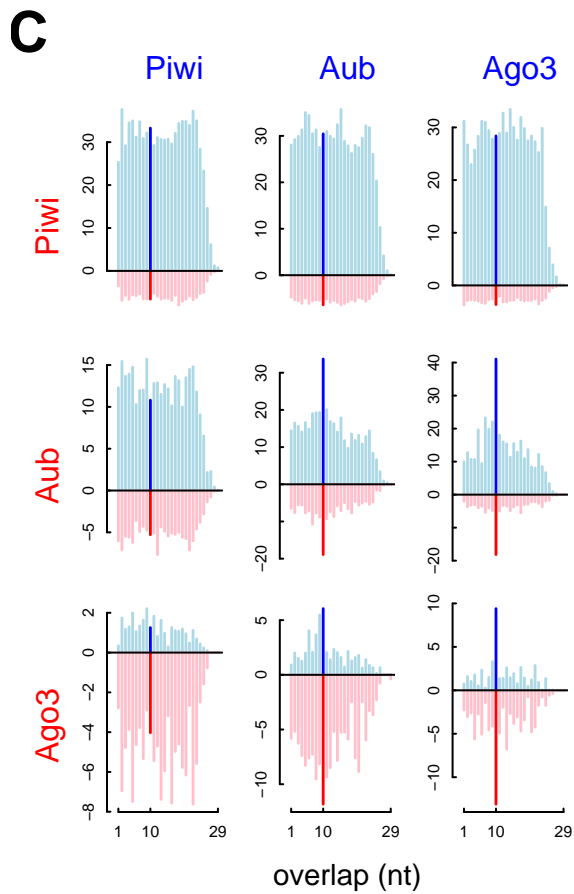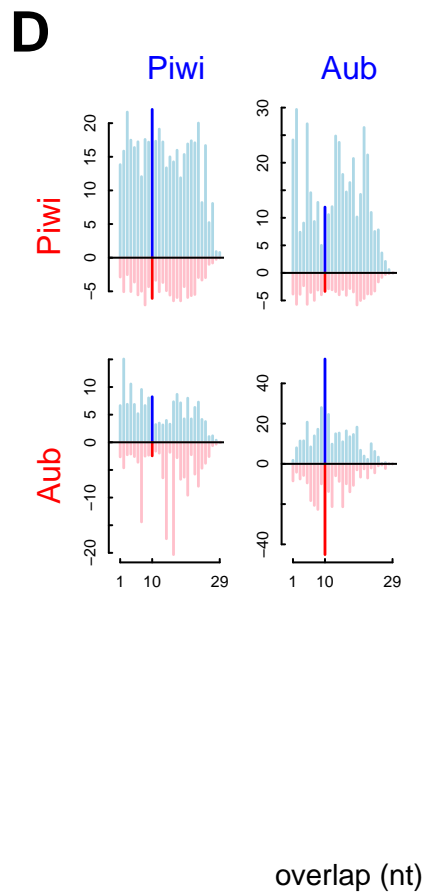

# rooA

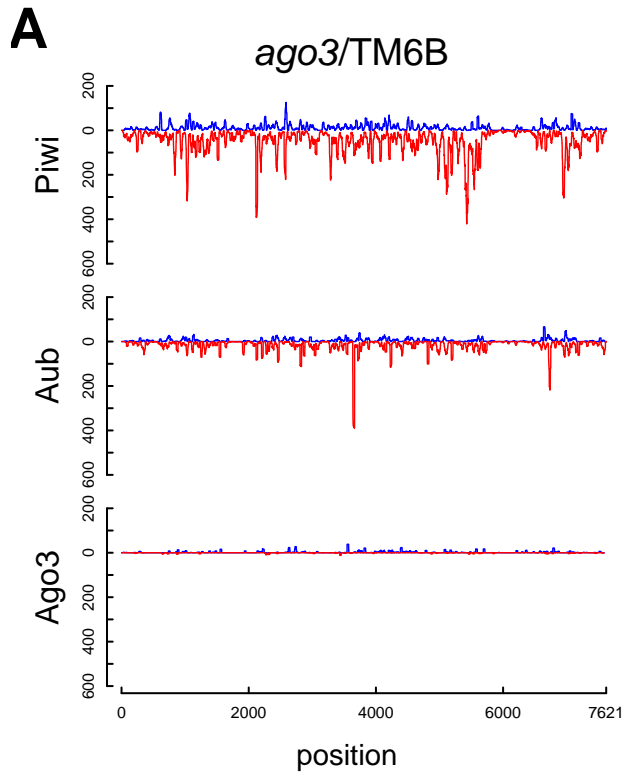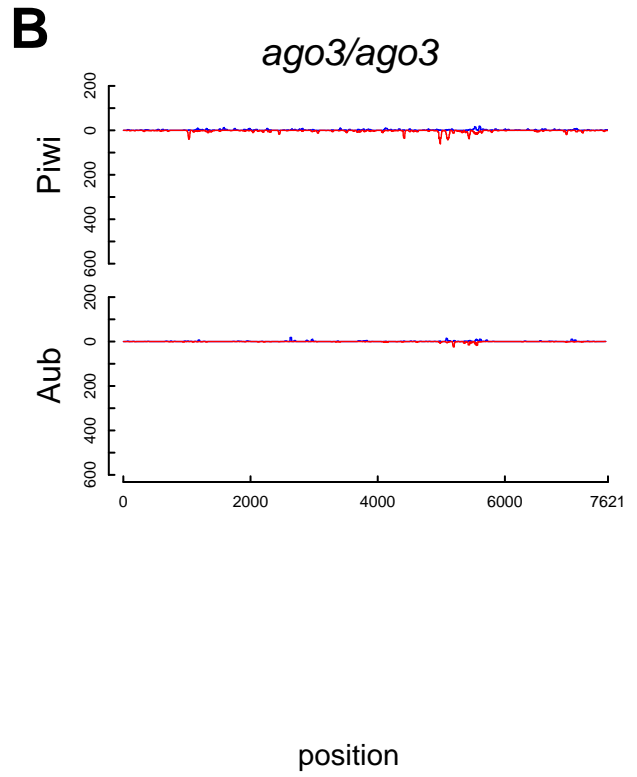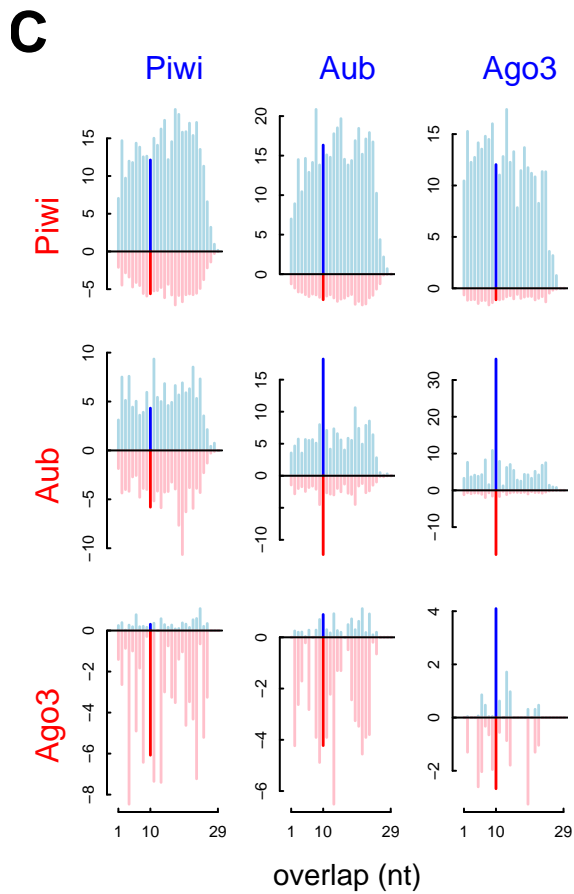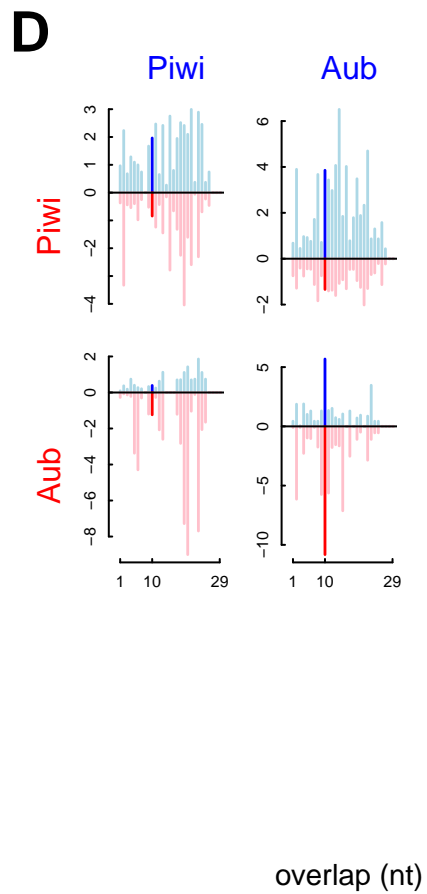

# rover

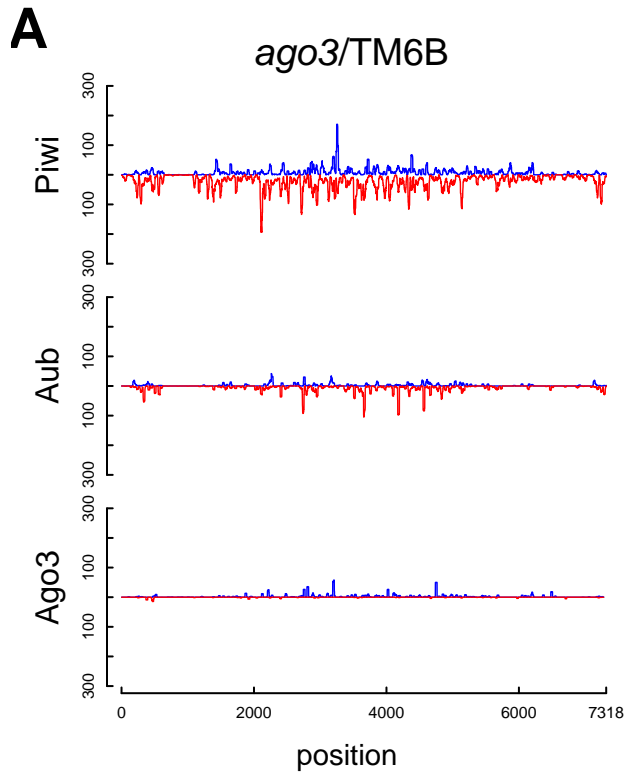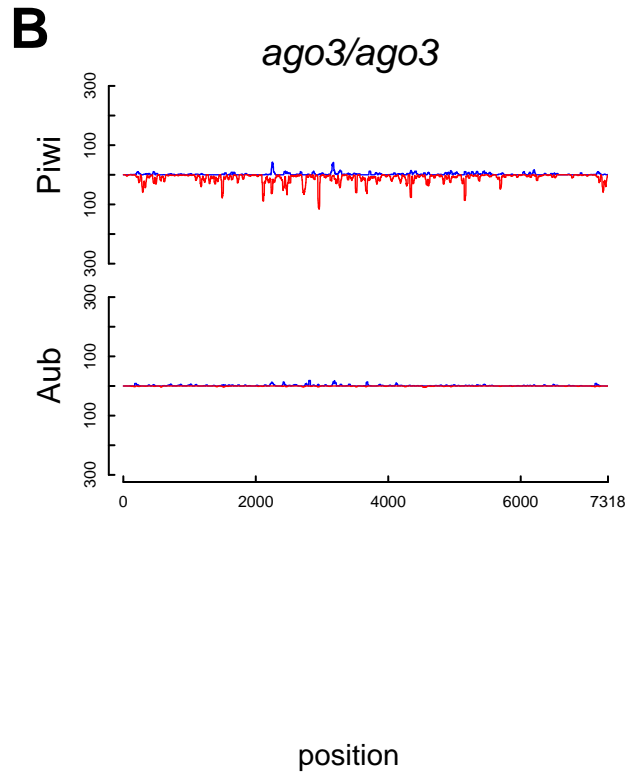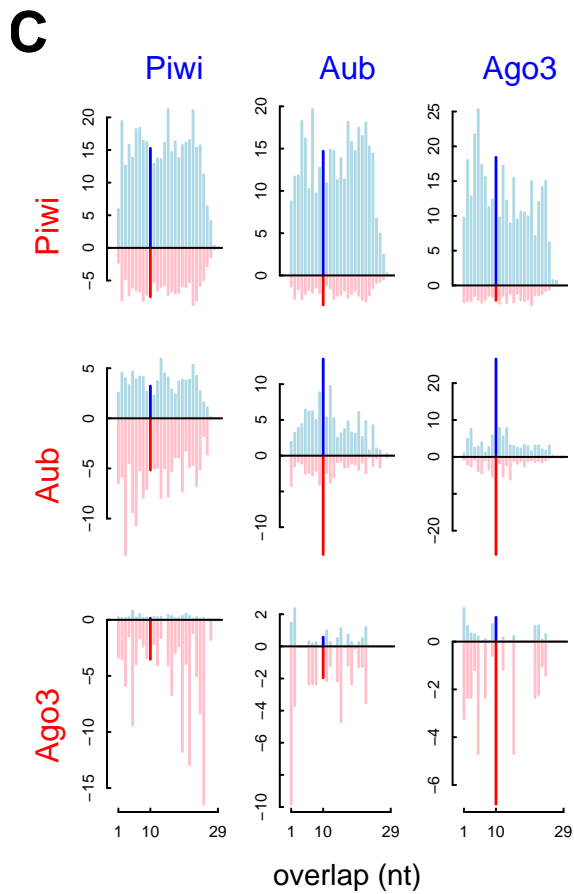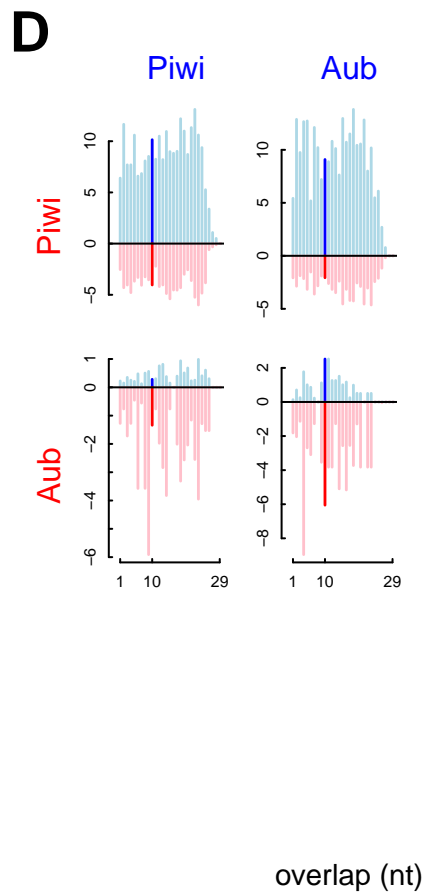

# *Rt1a*

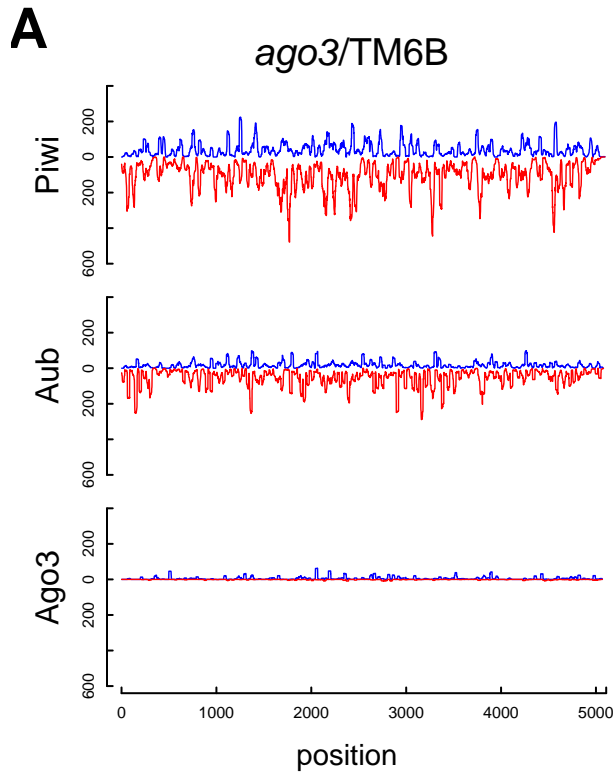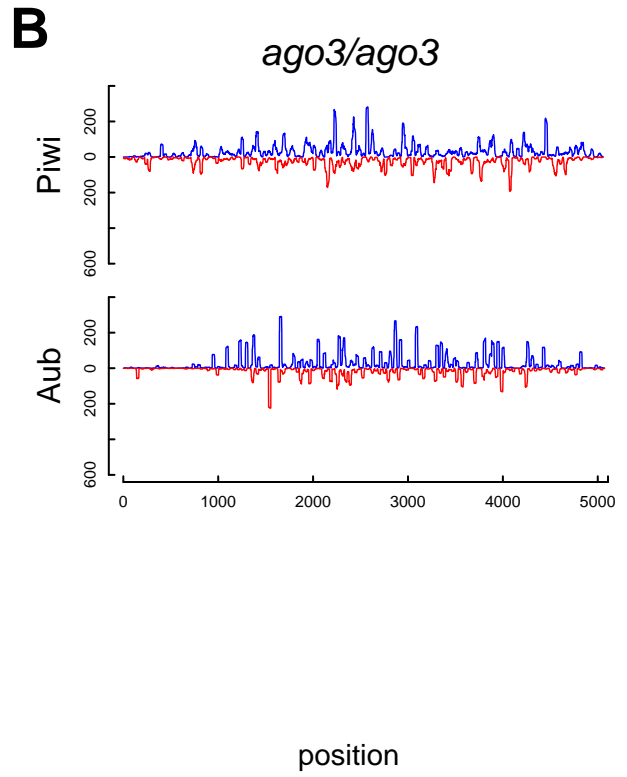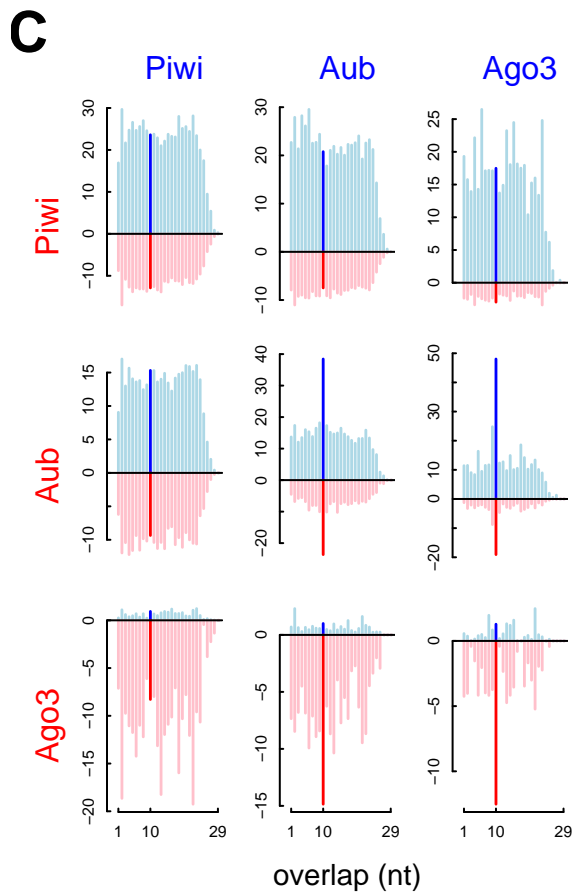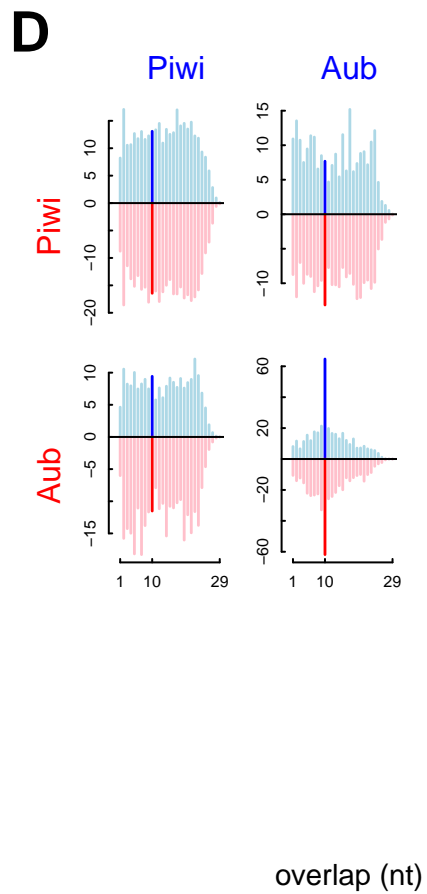

# Rt1b

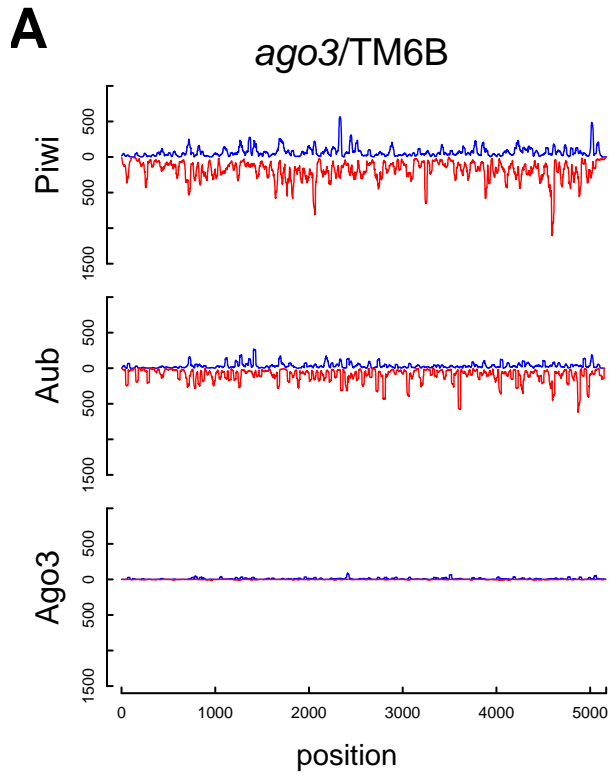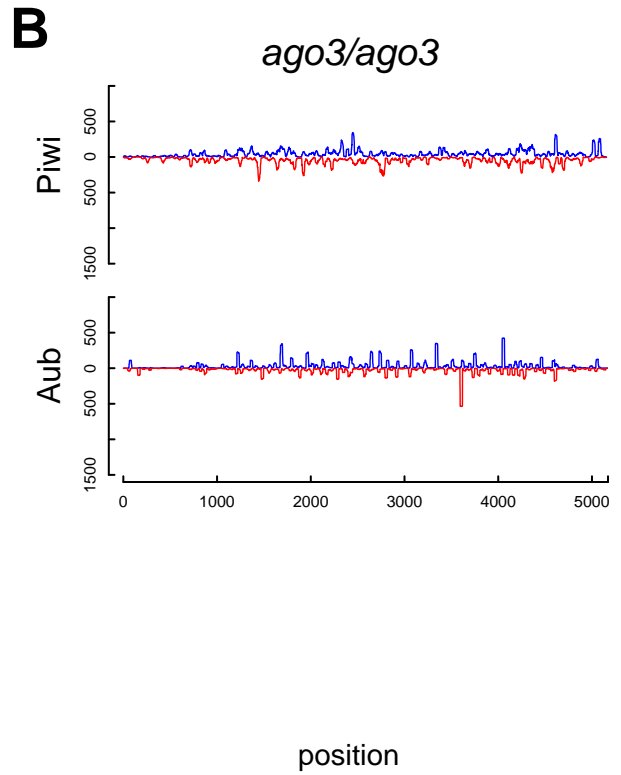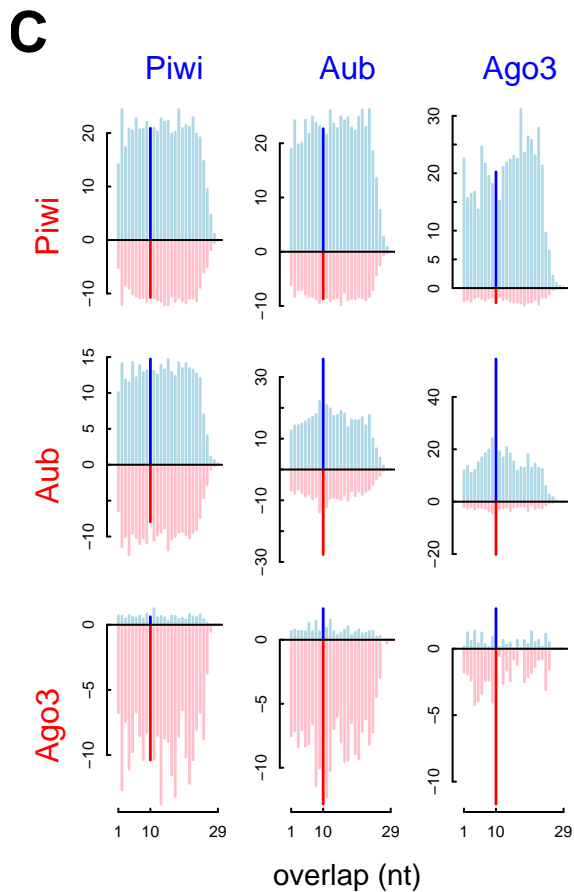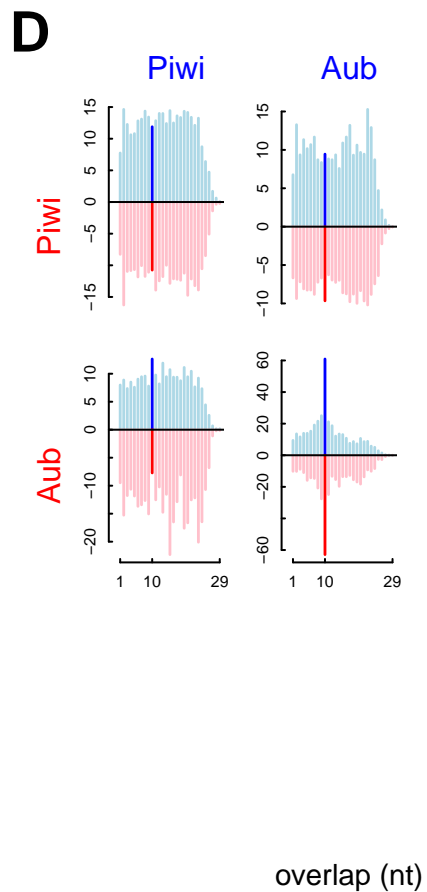

# Rt1c

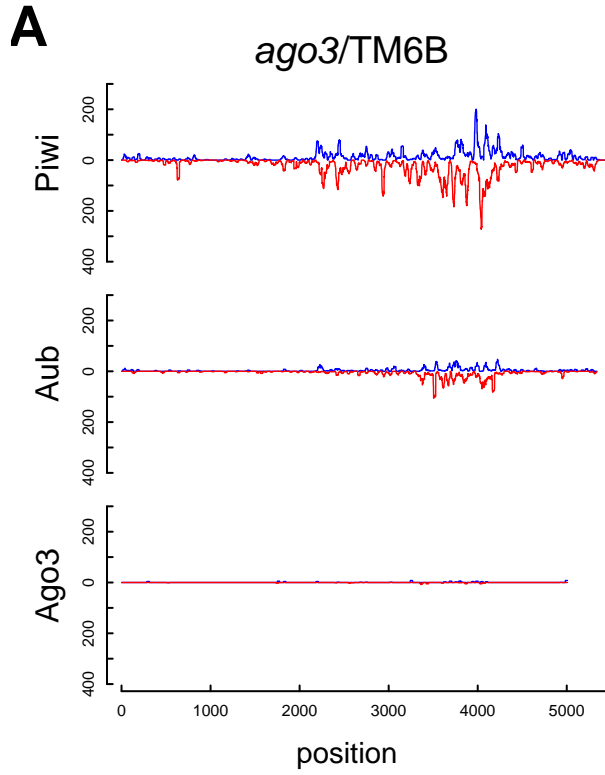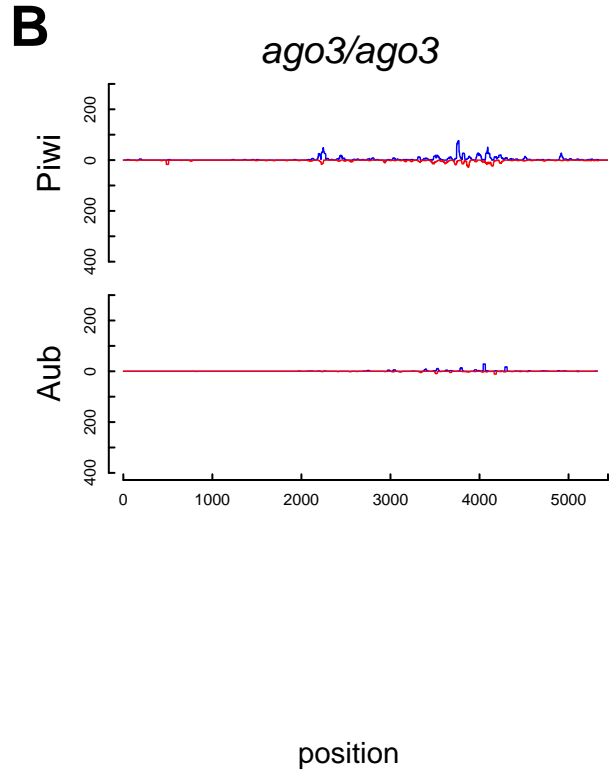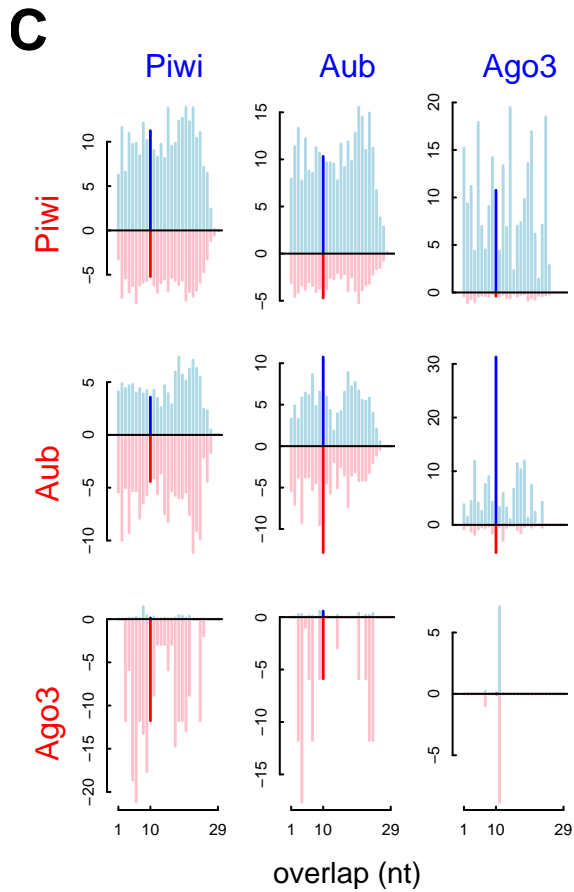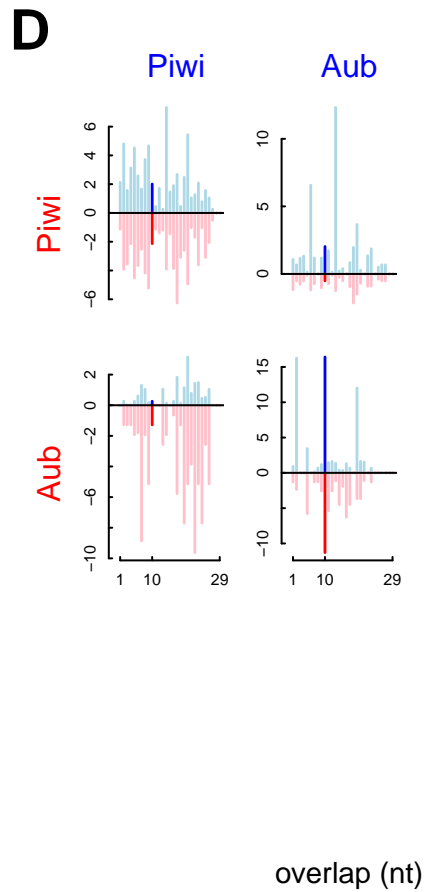



# S element

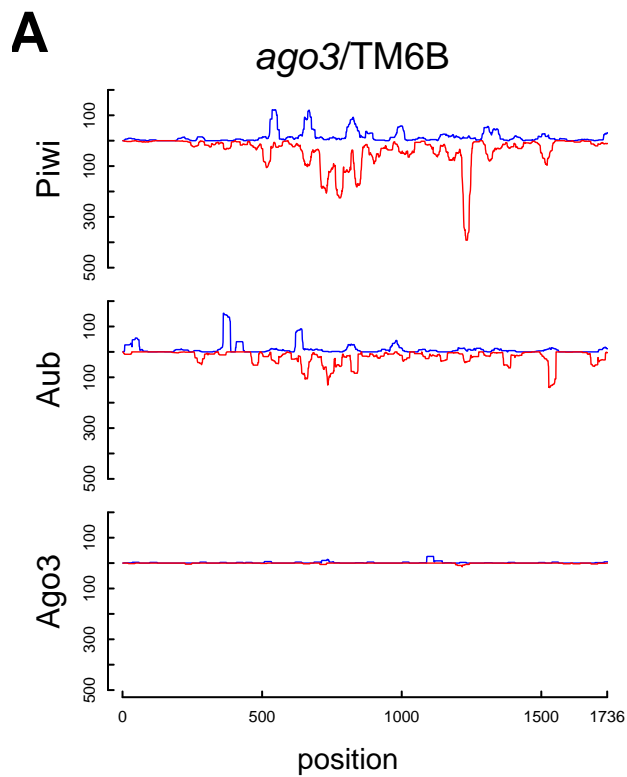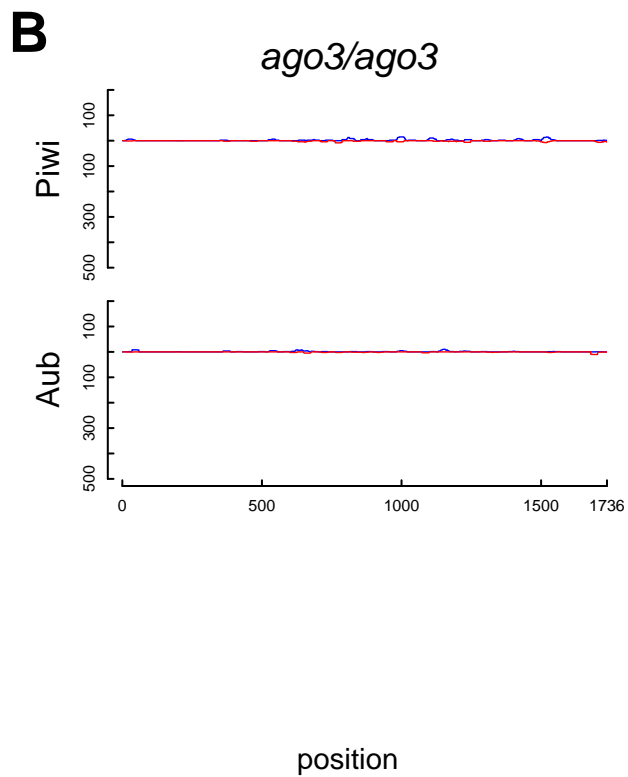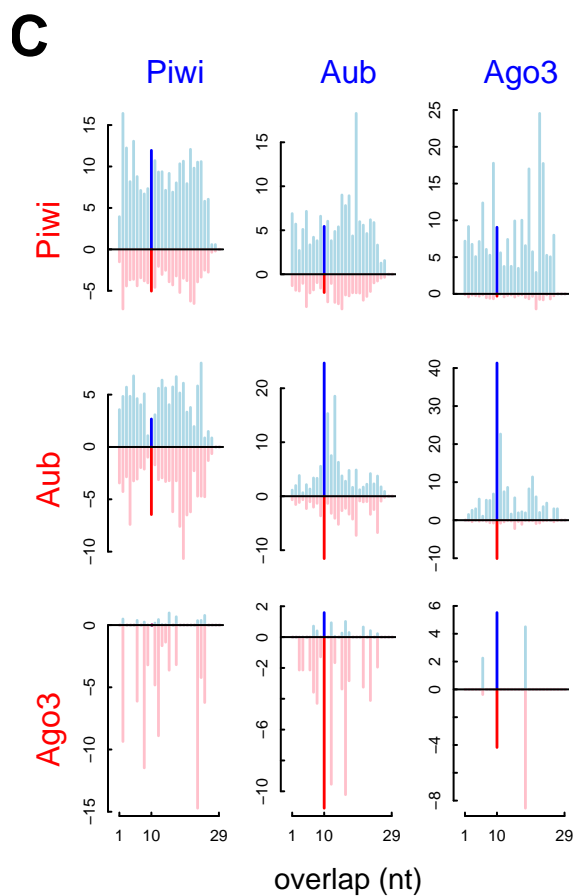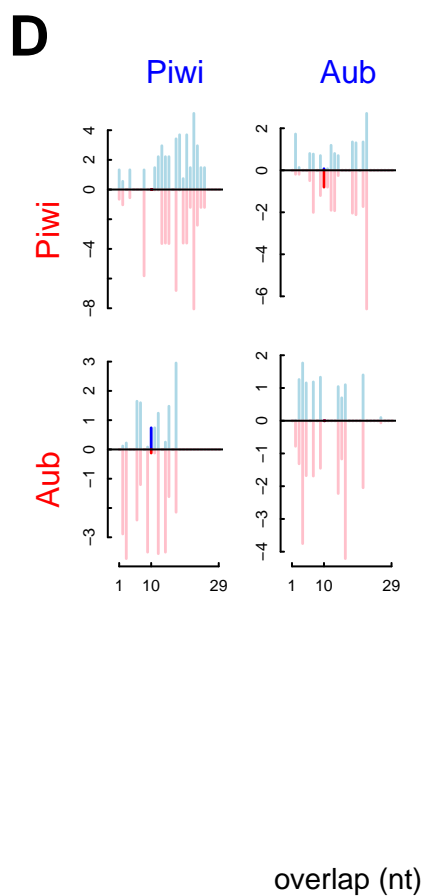

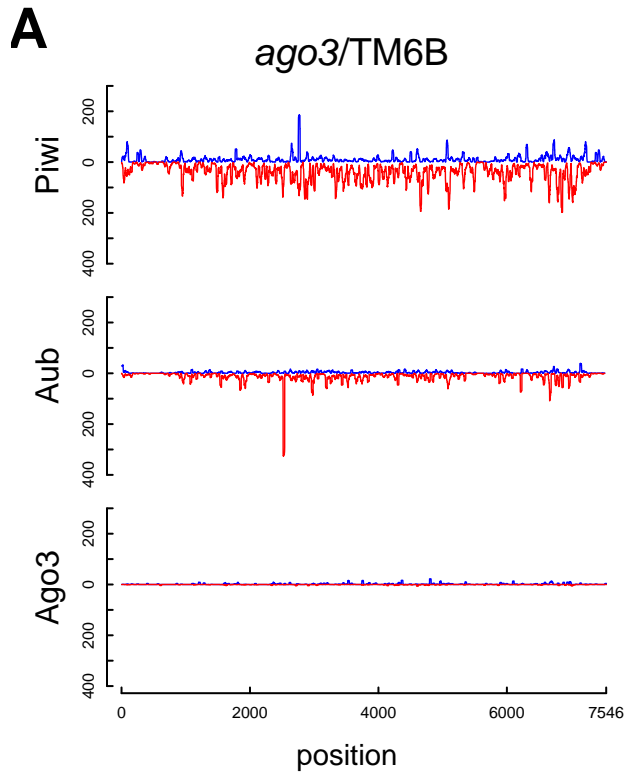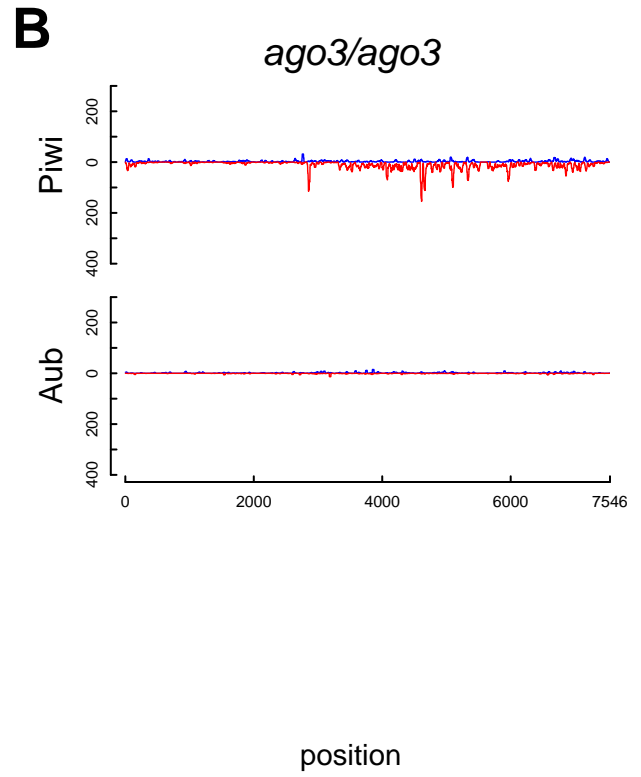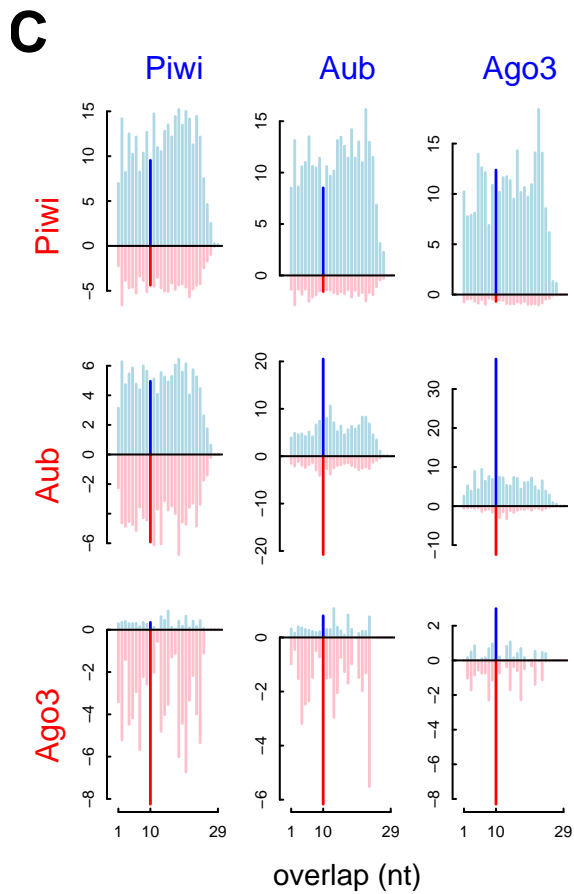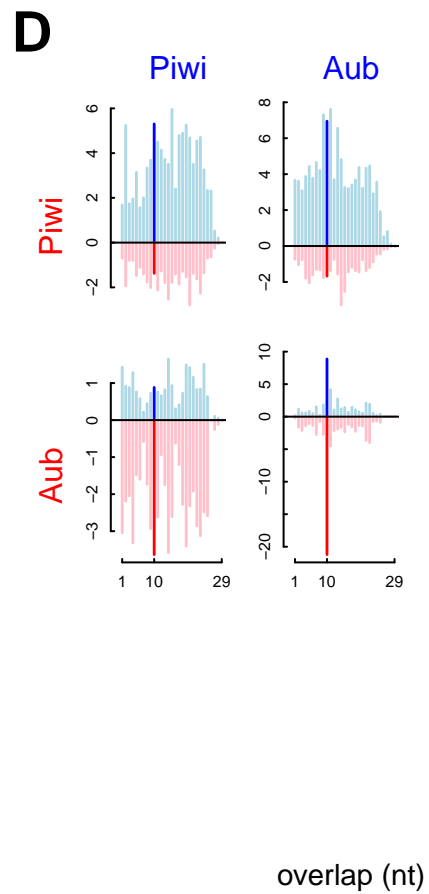

# Stalker

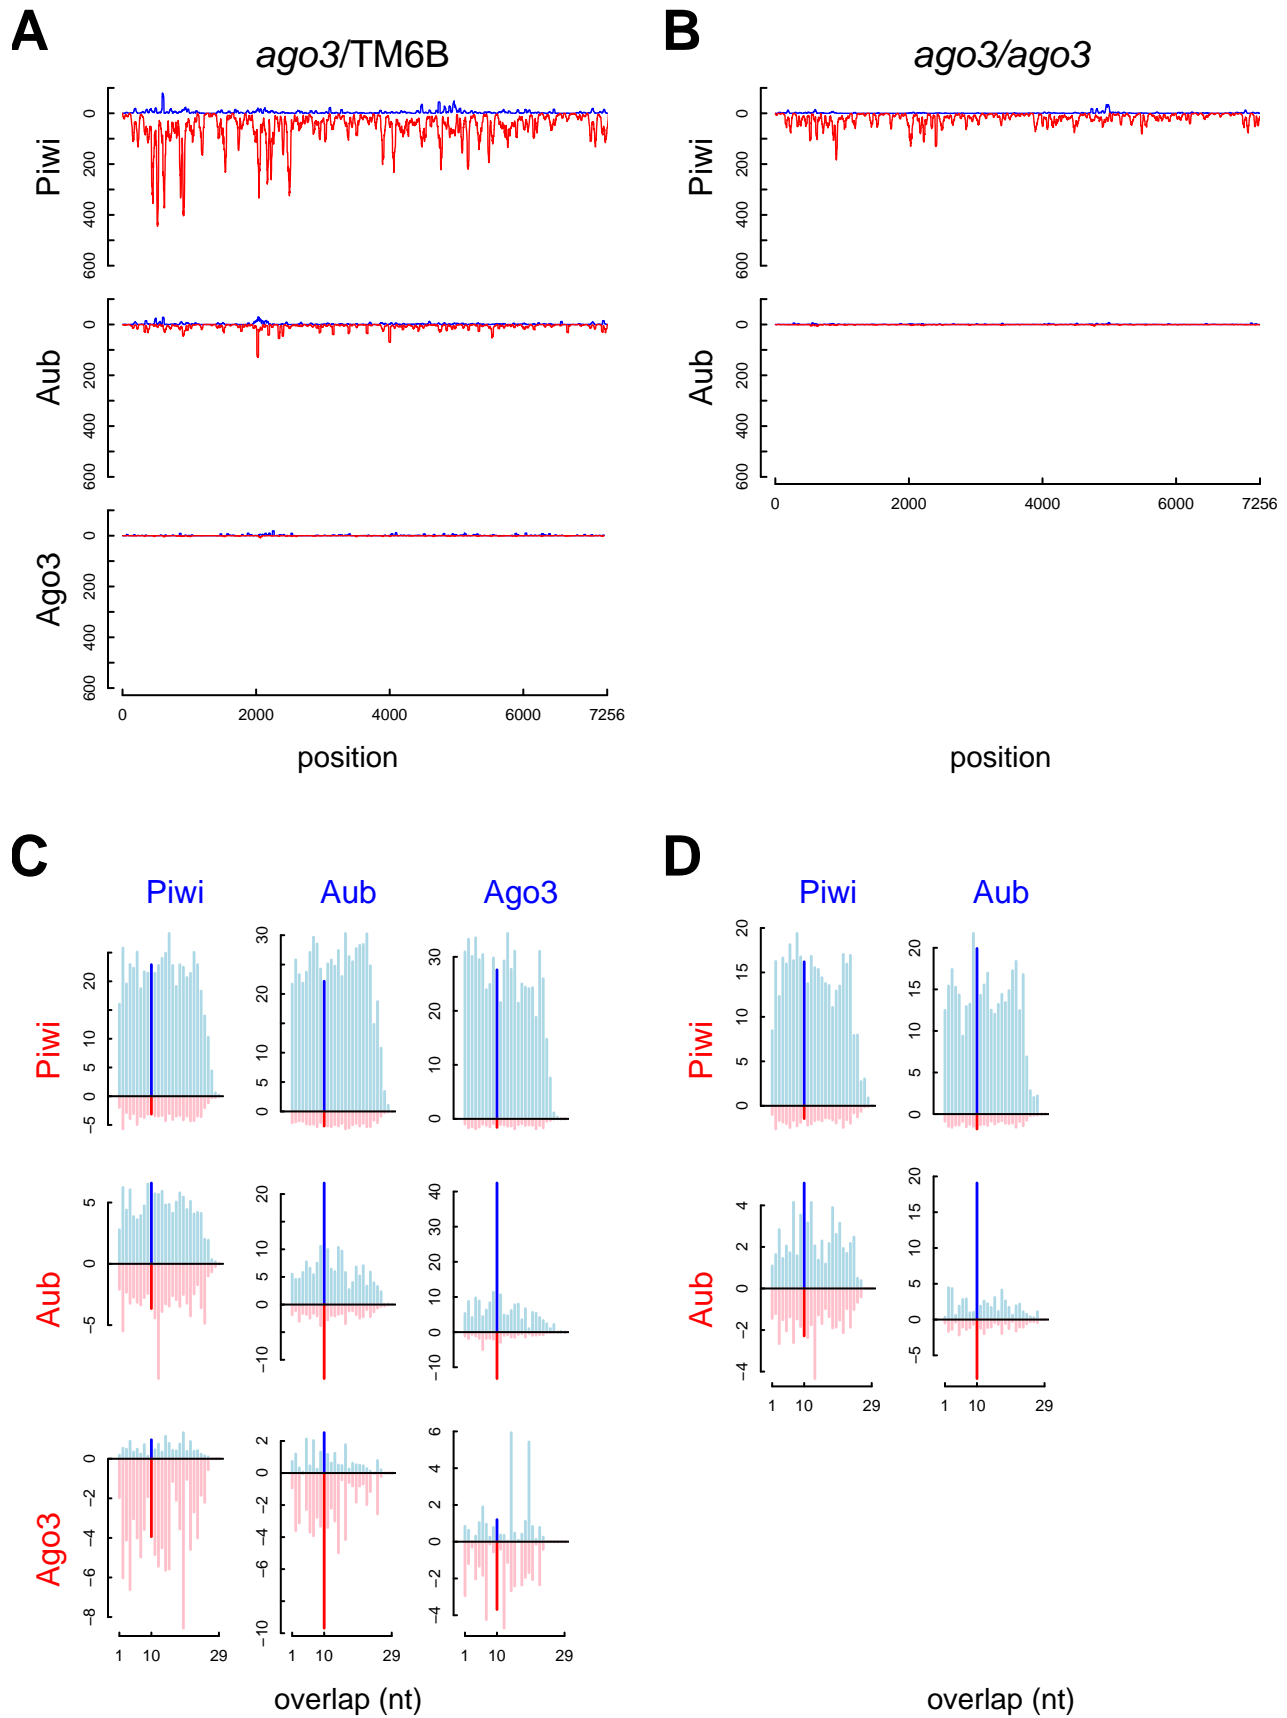

# Stalker2

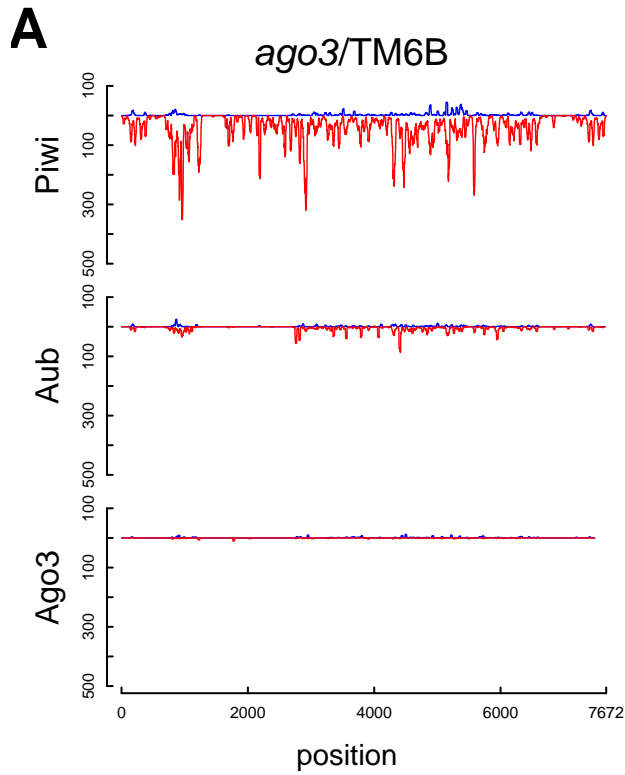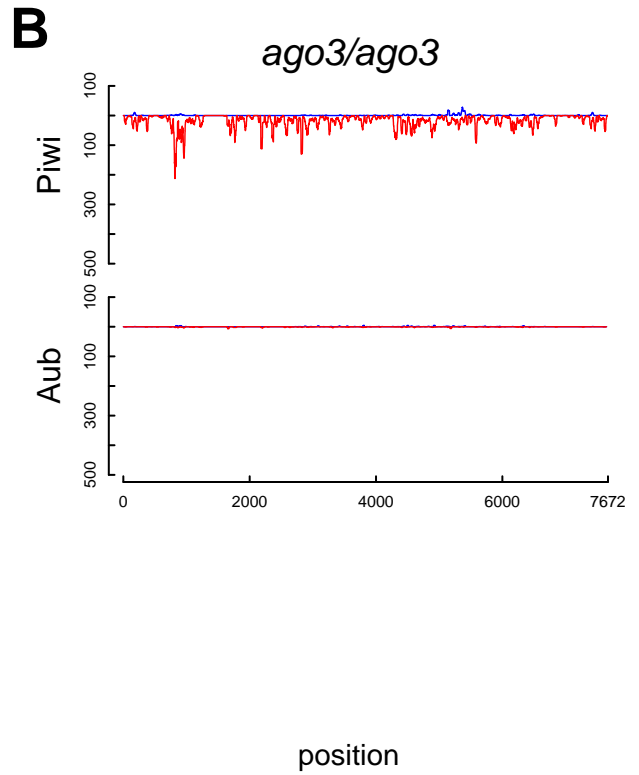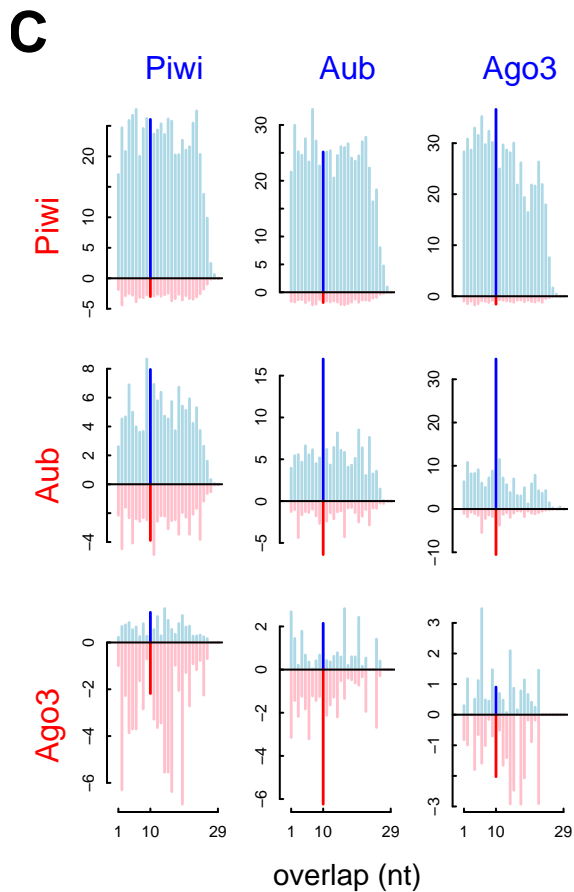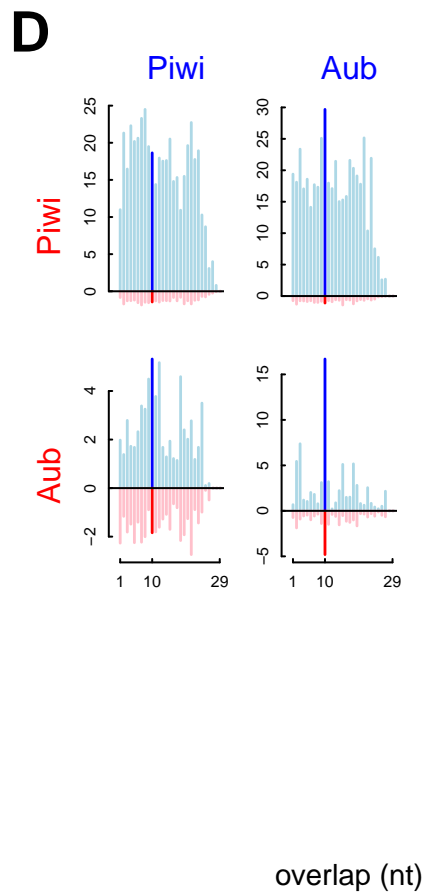

# Stalker3

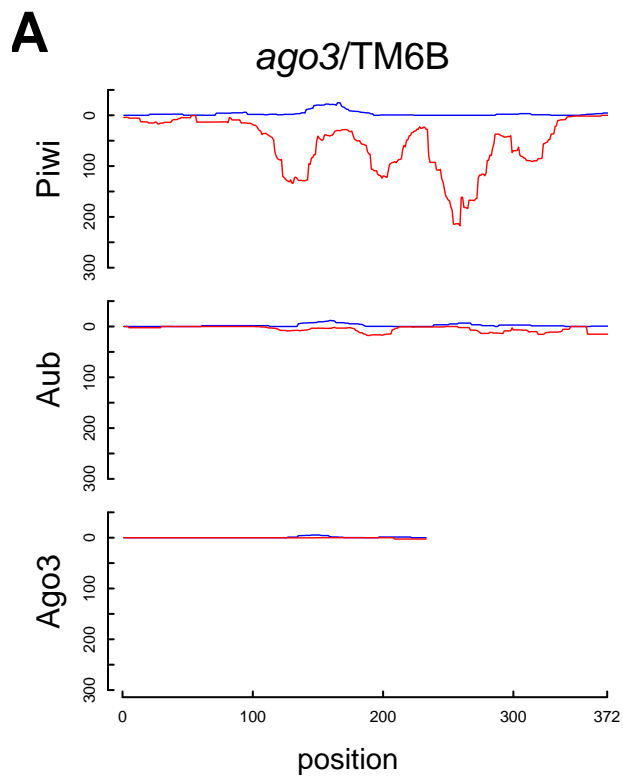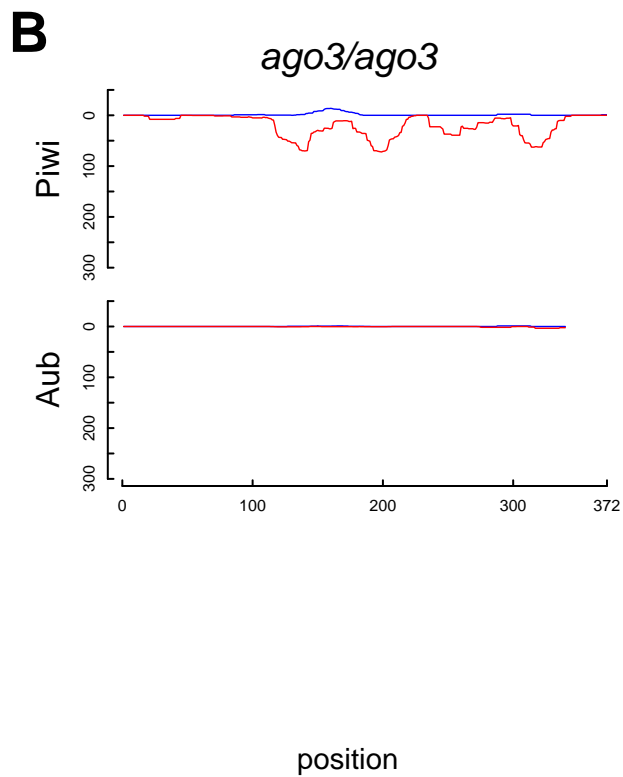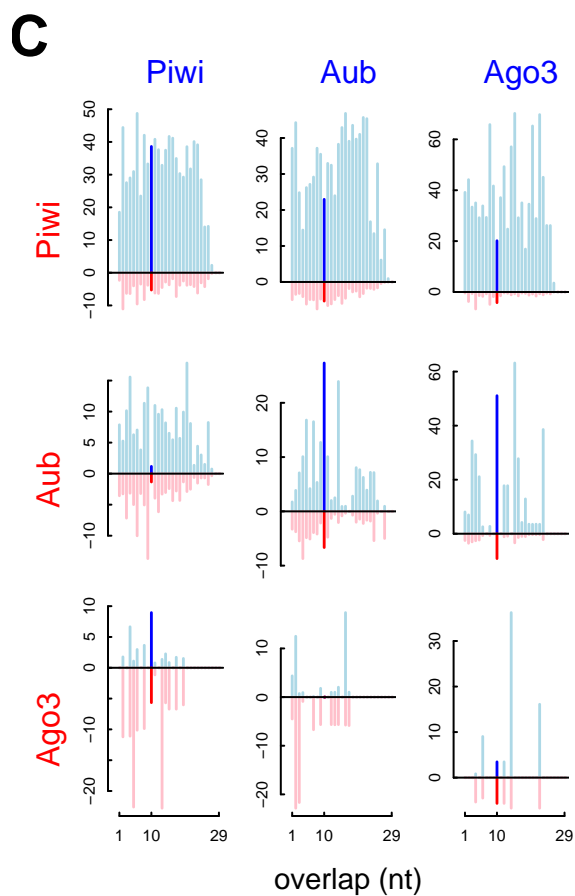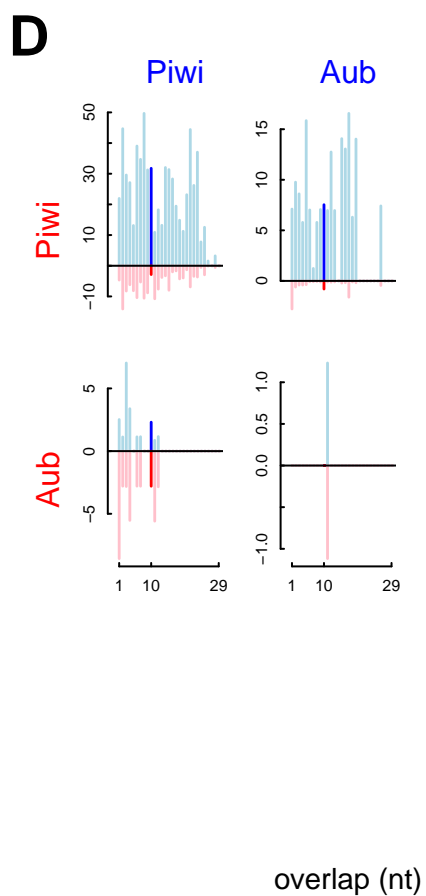

# Stalker4

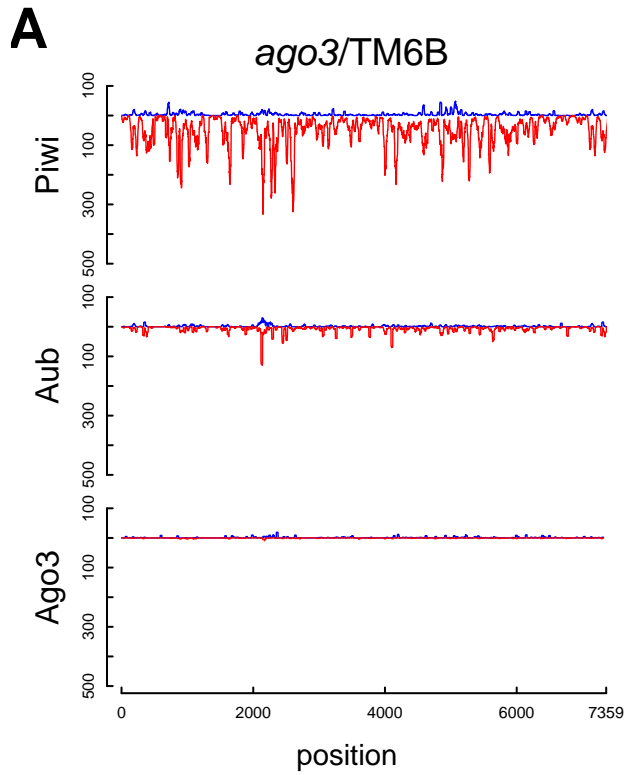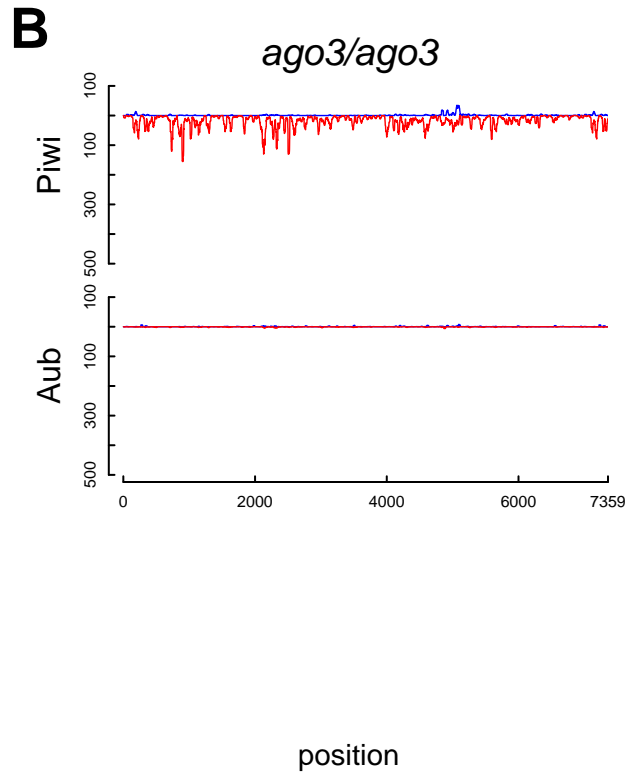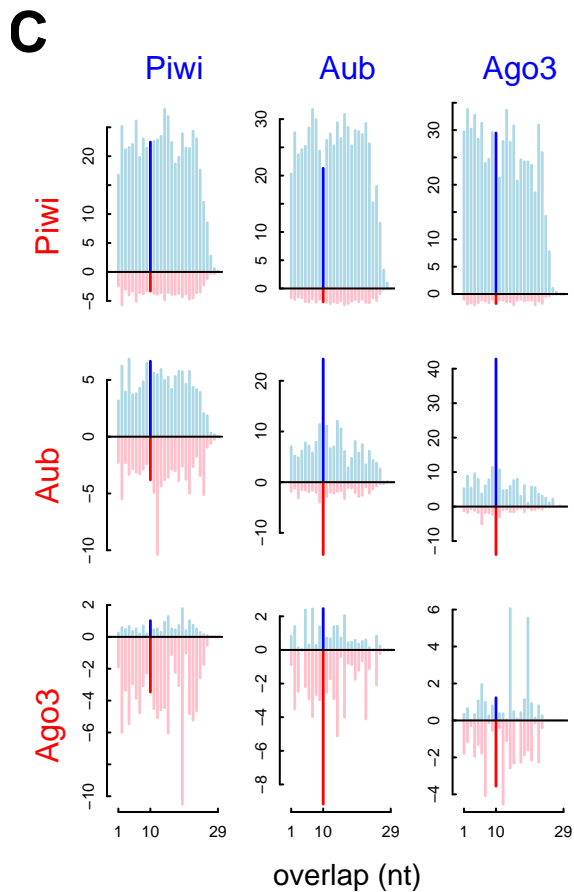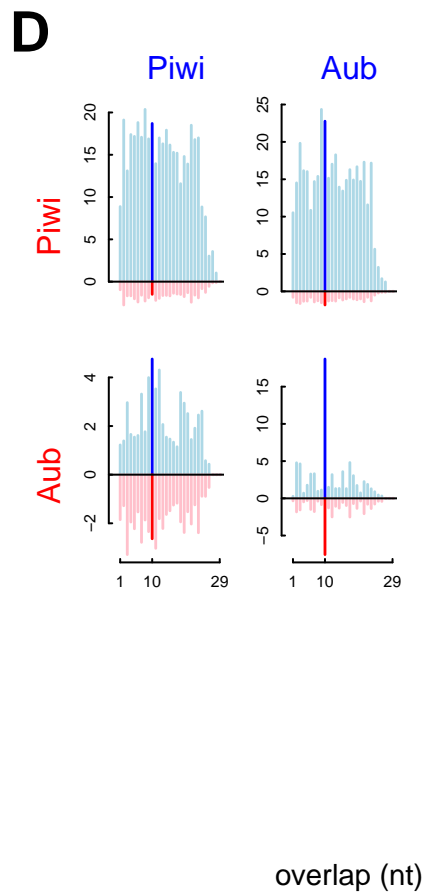

# Tabor

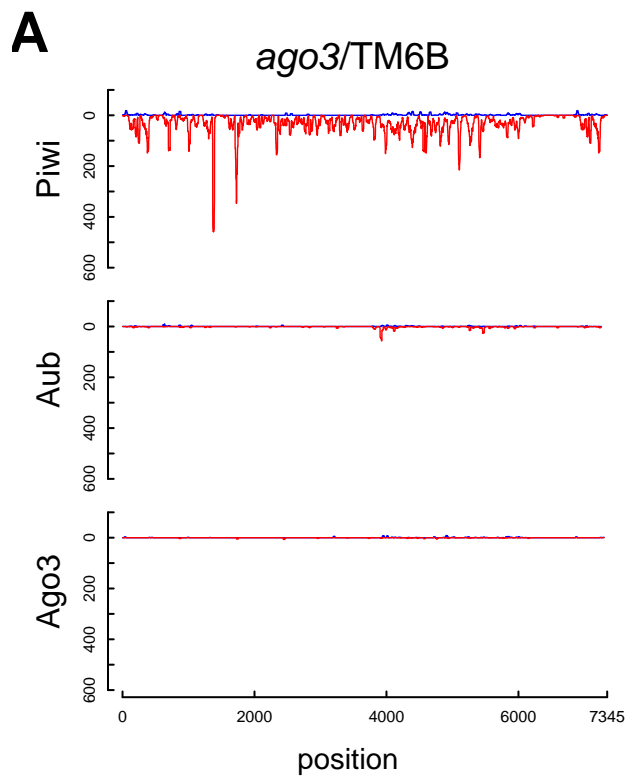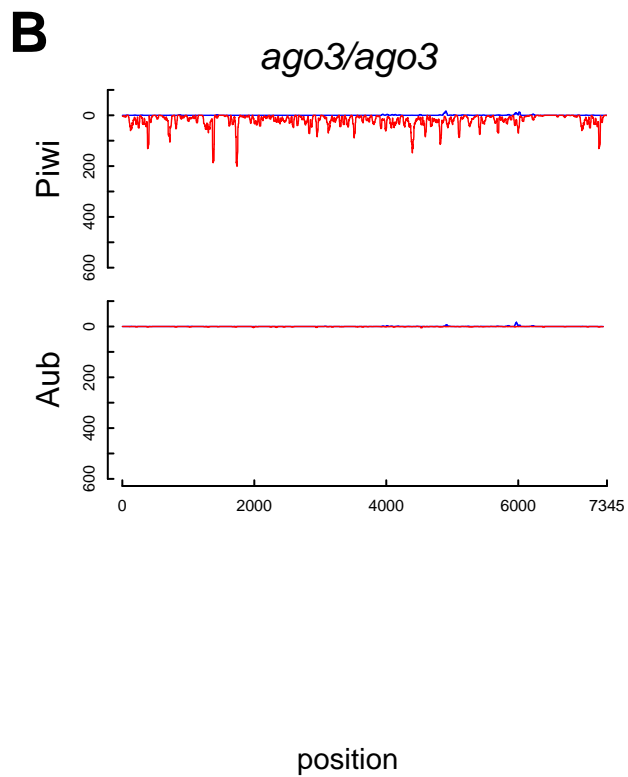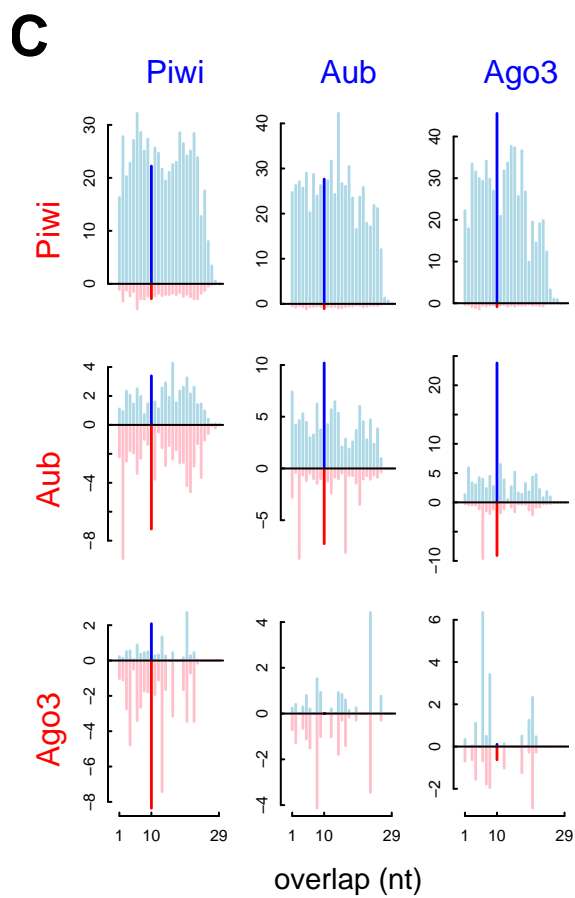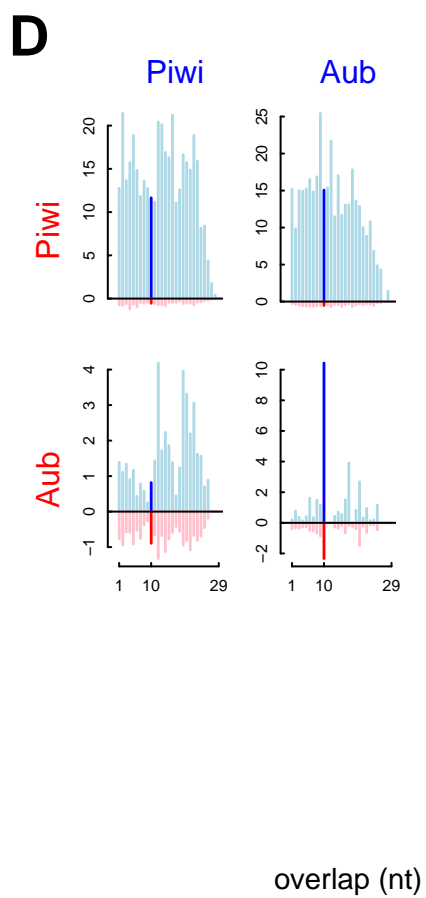

# TAHRE

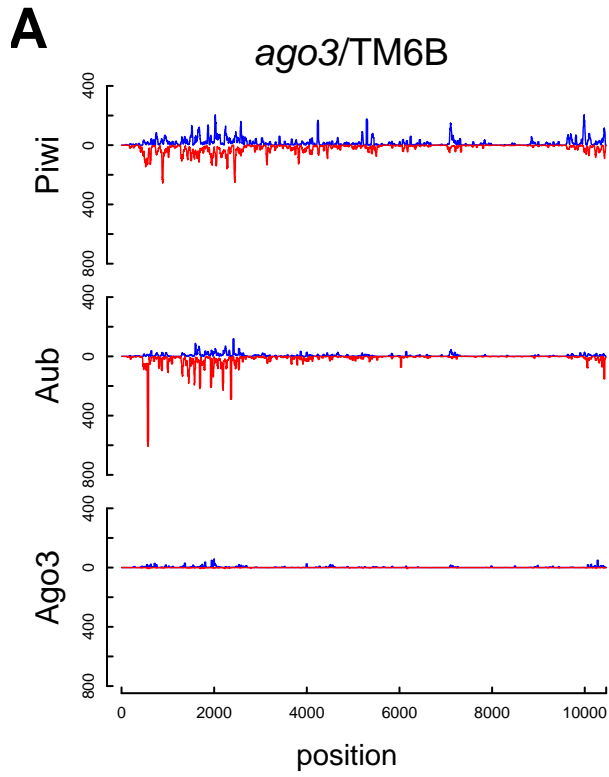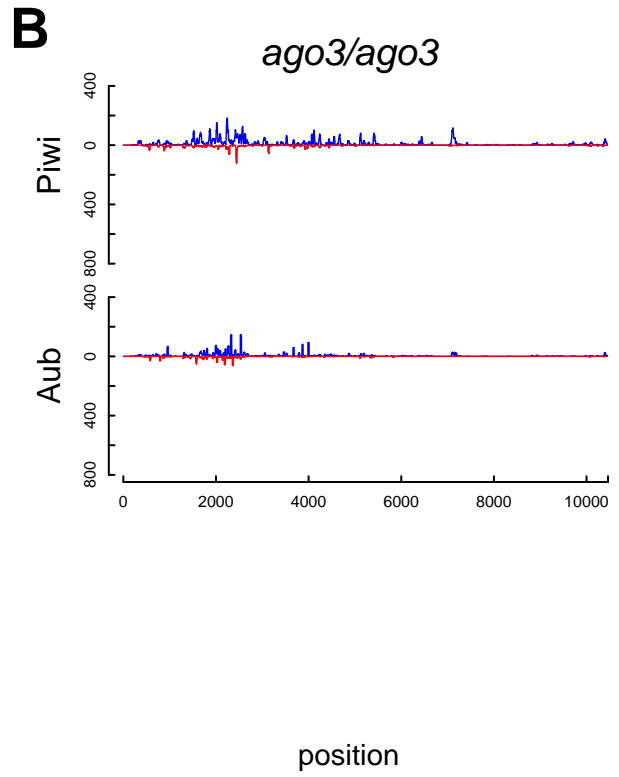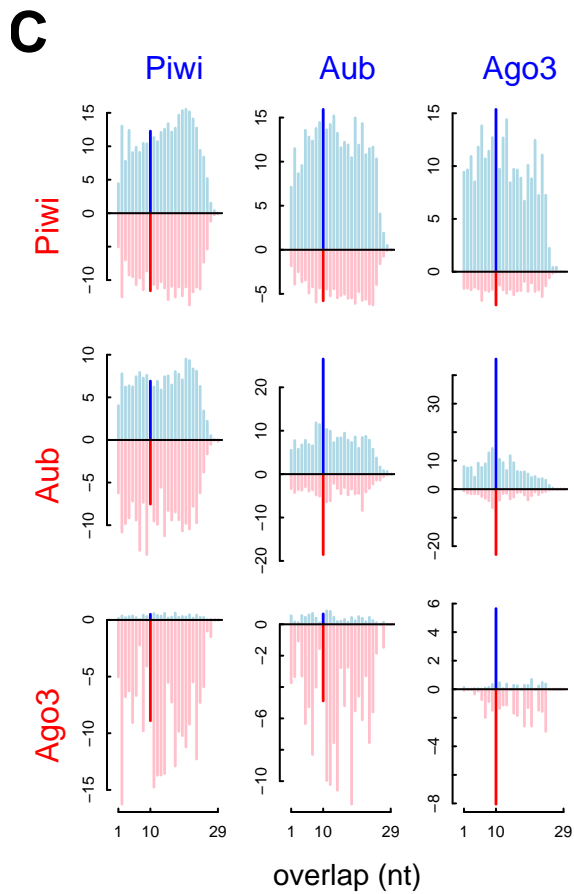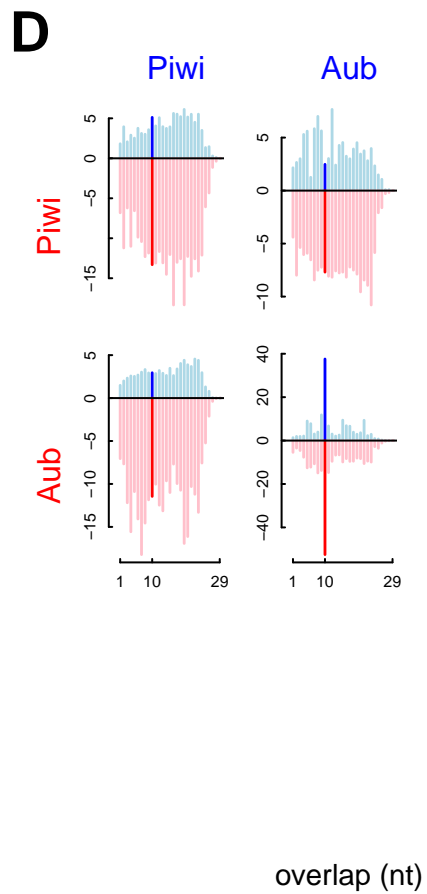



# TART A, B and C

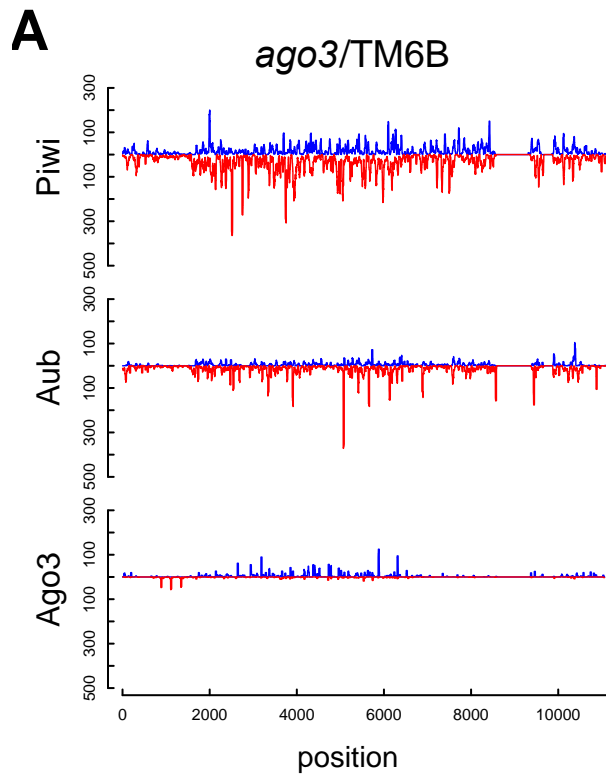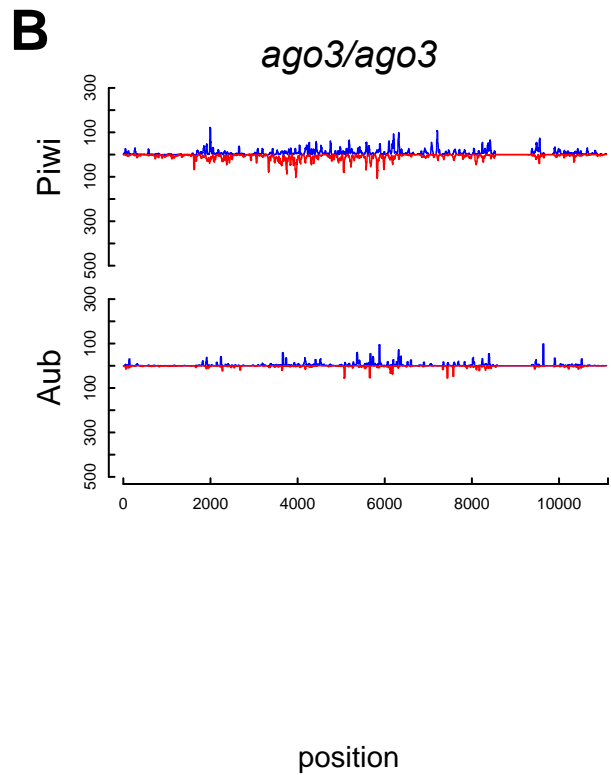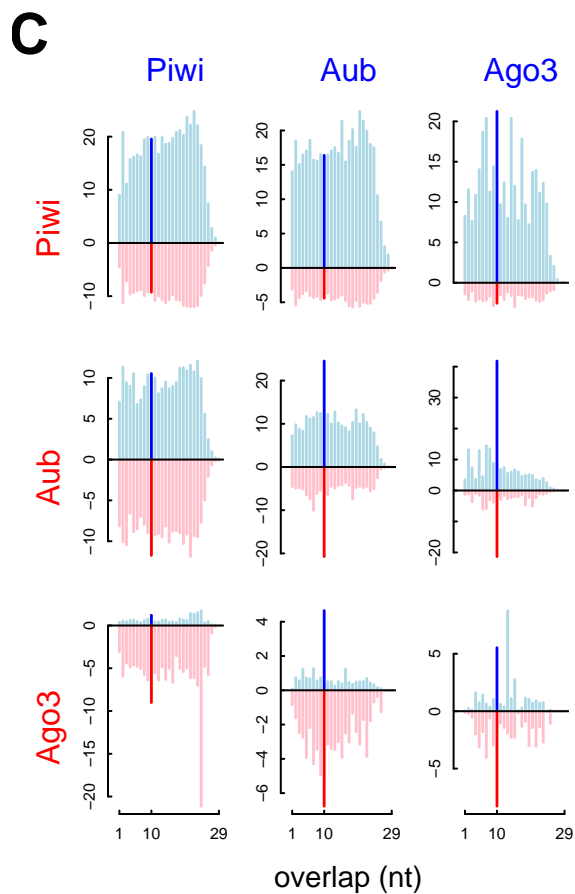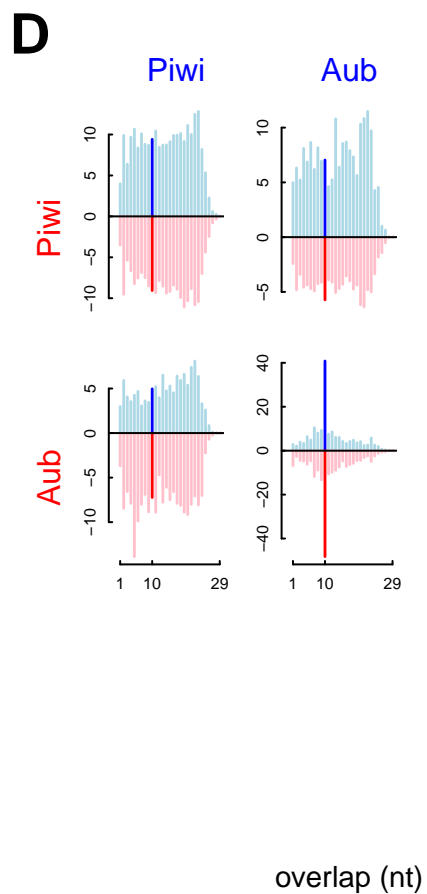

# *transib2*

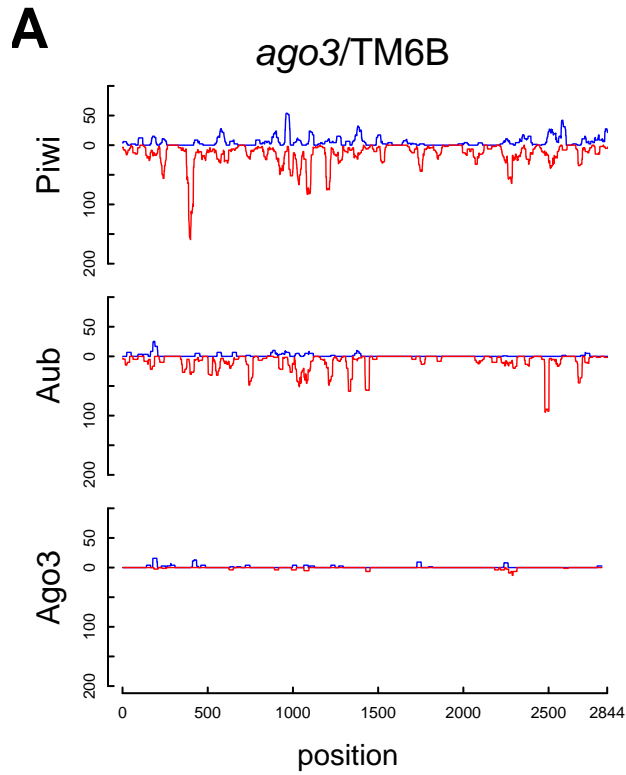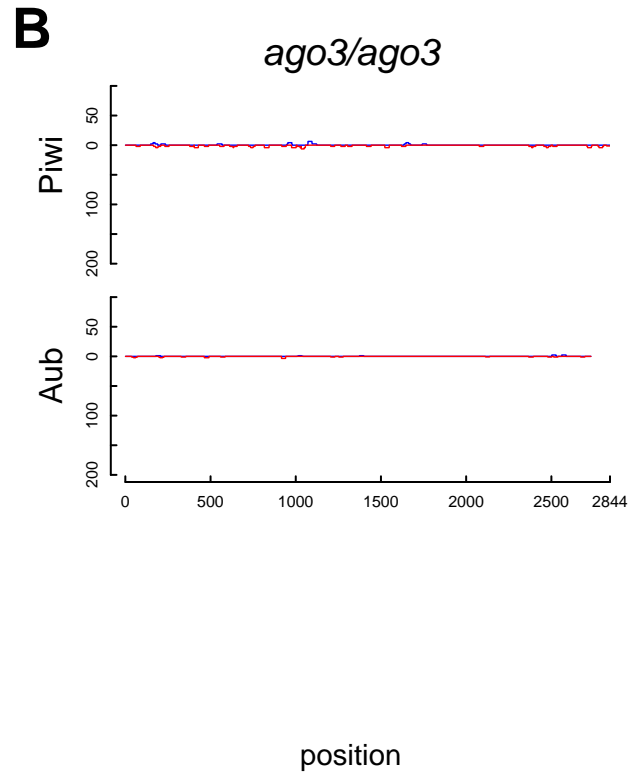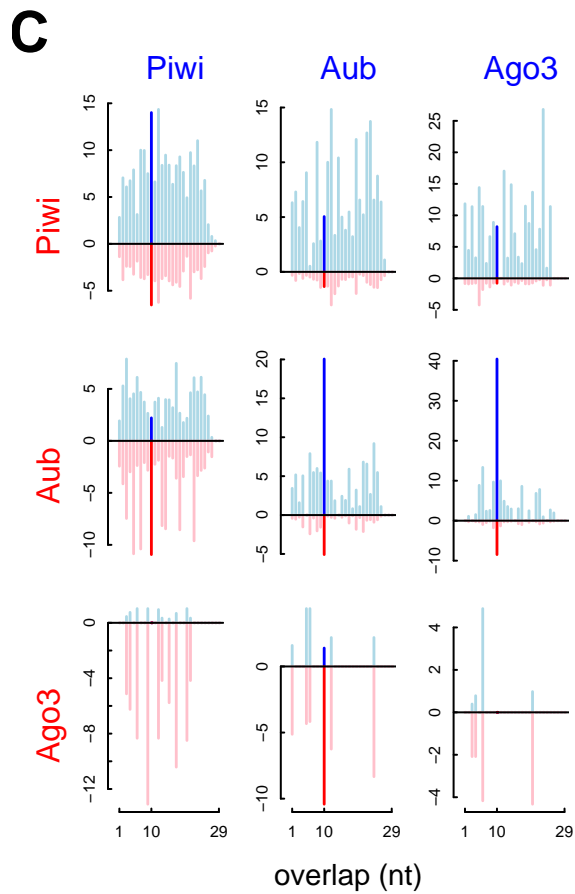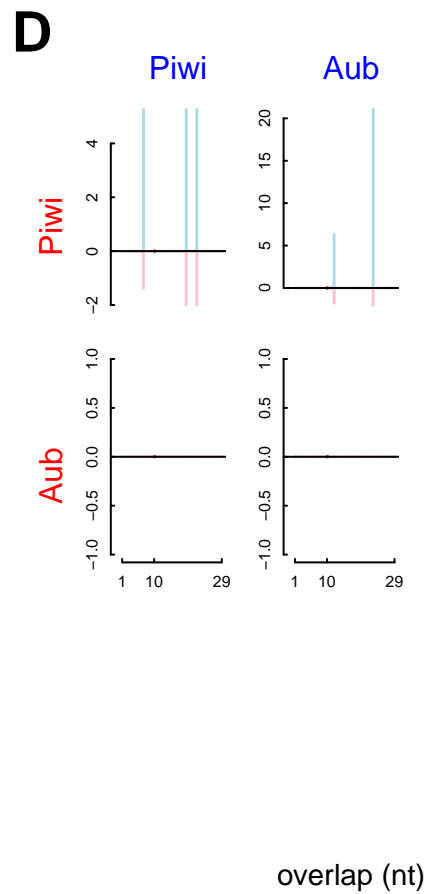

# Transpac

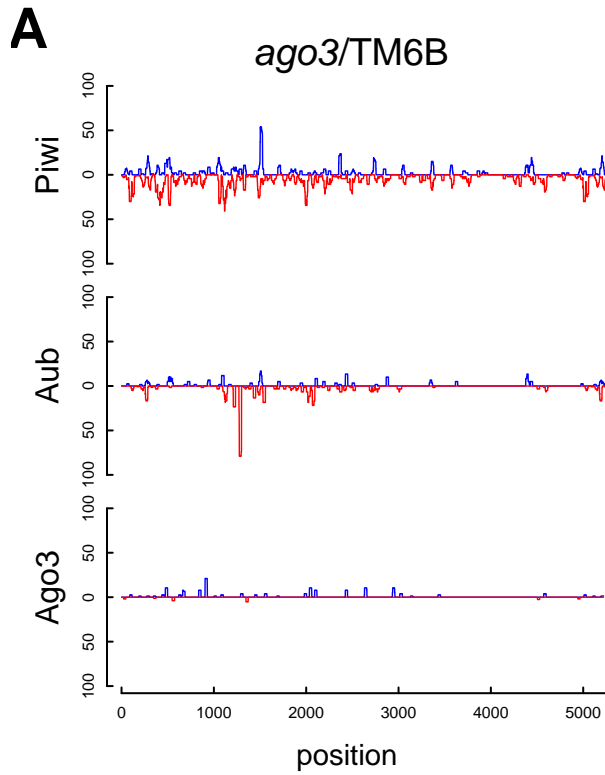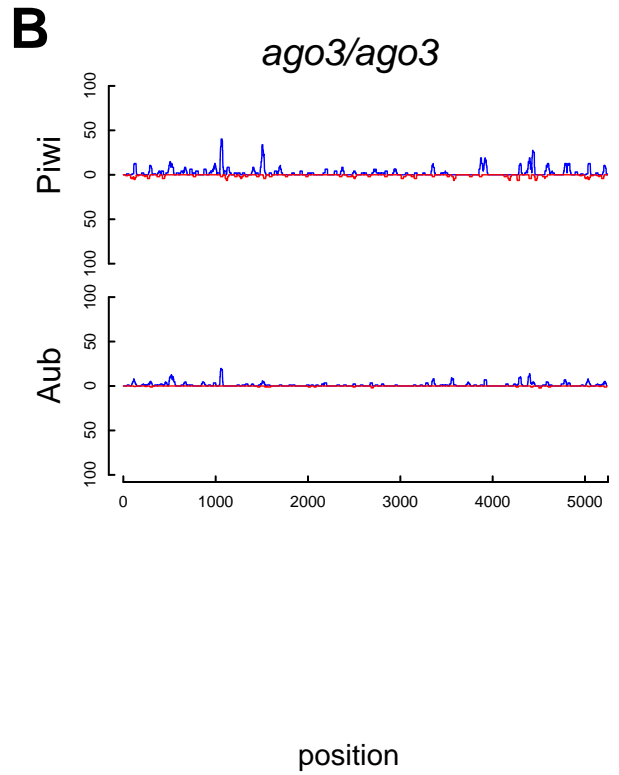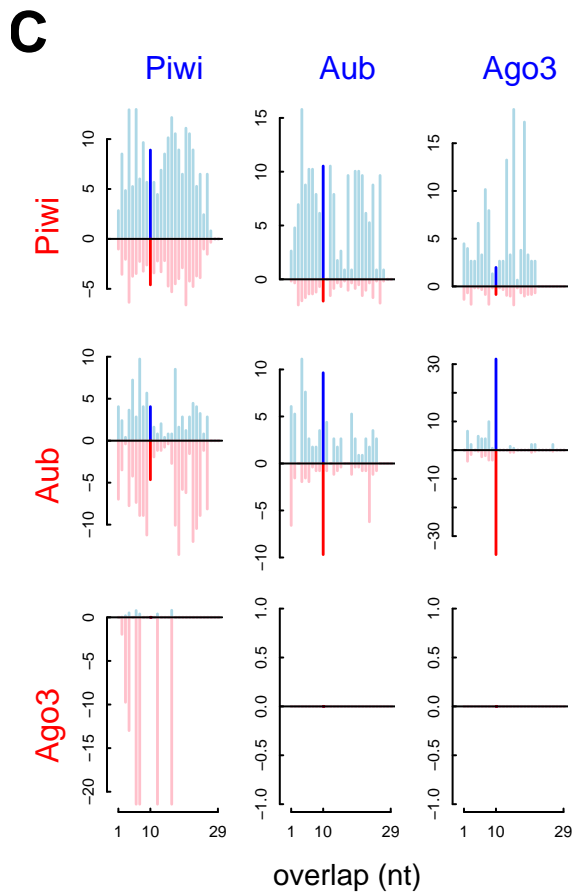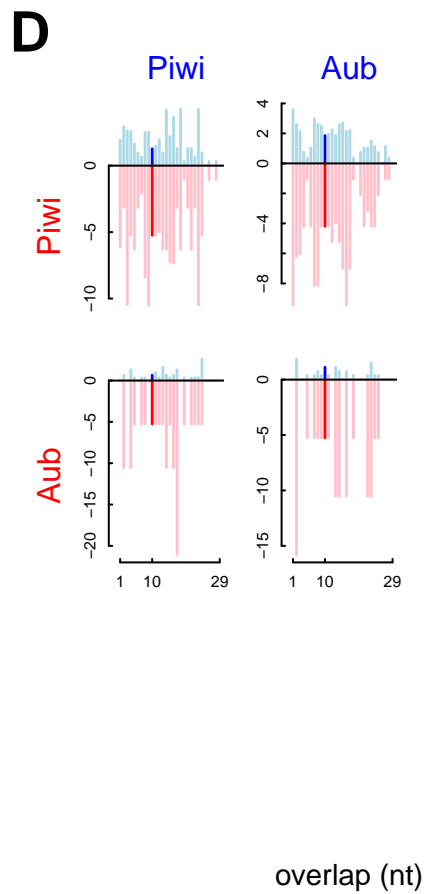

# X element

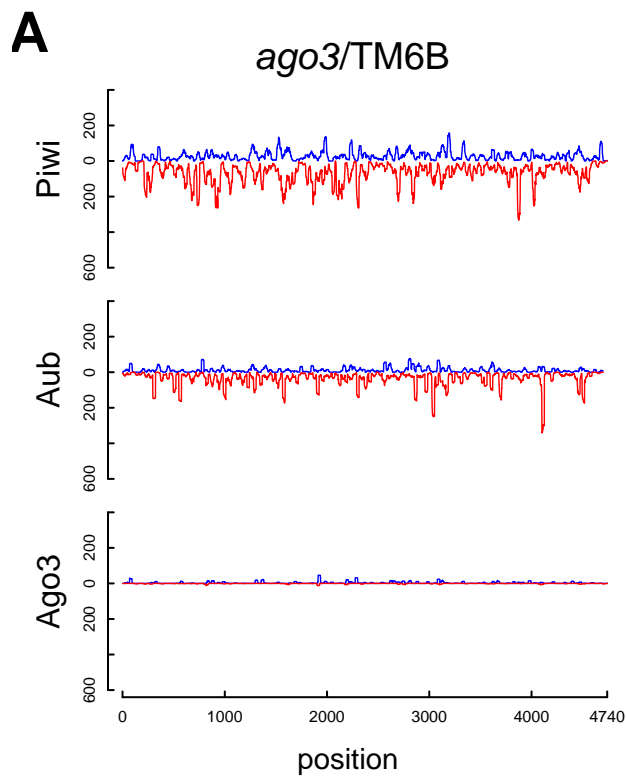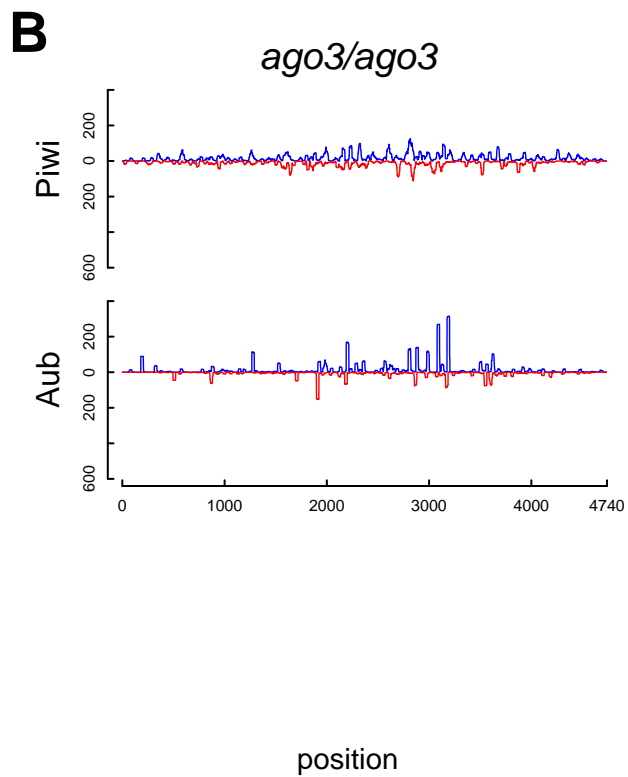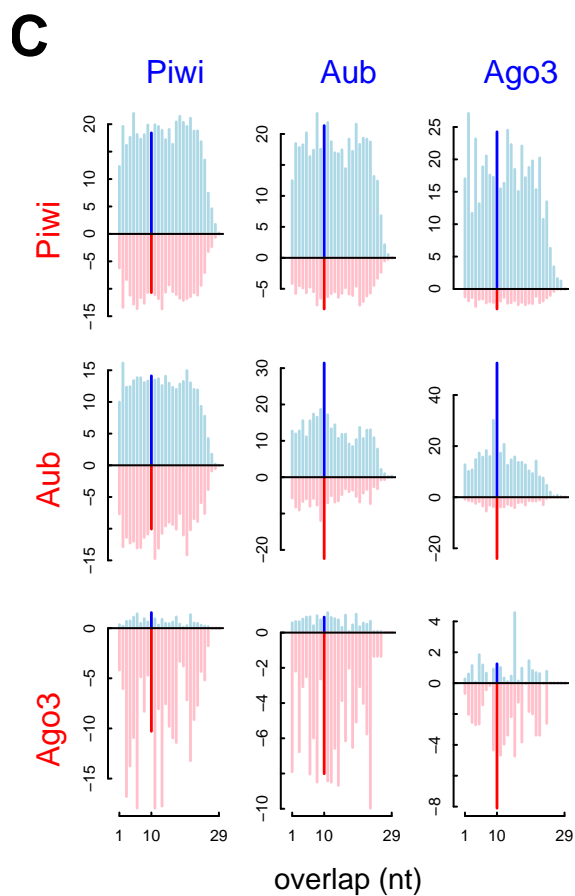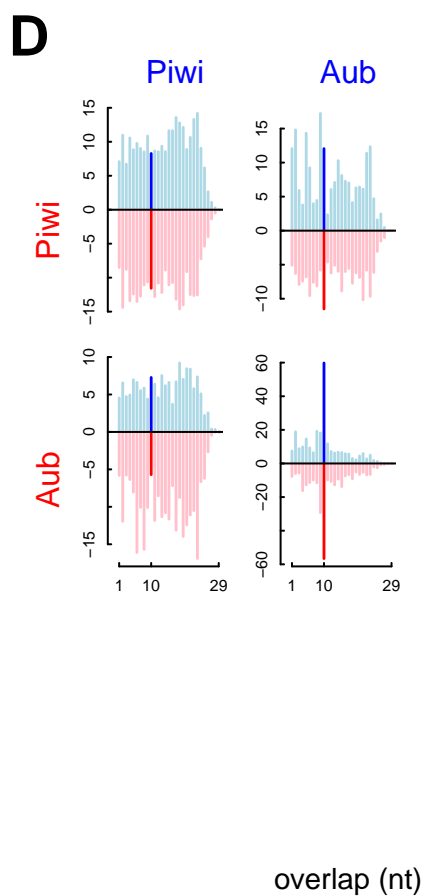

# ZAM

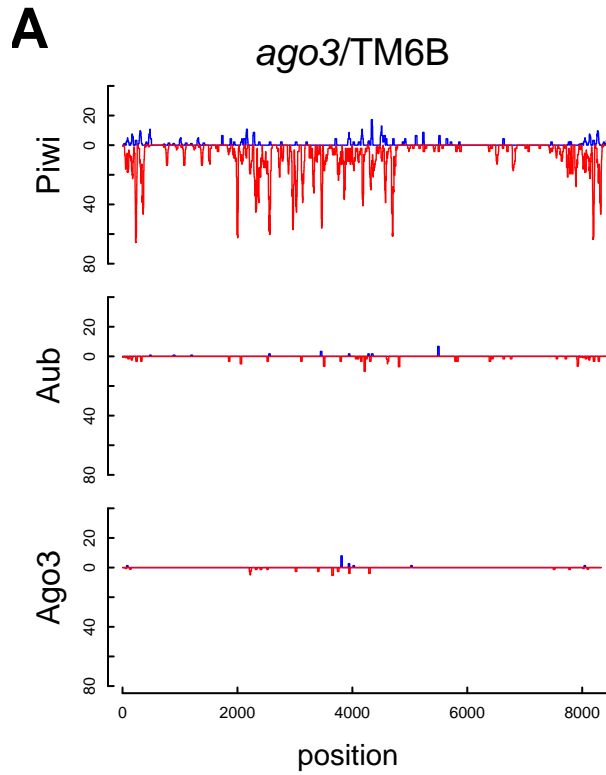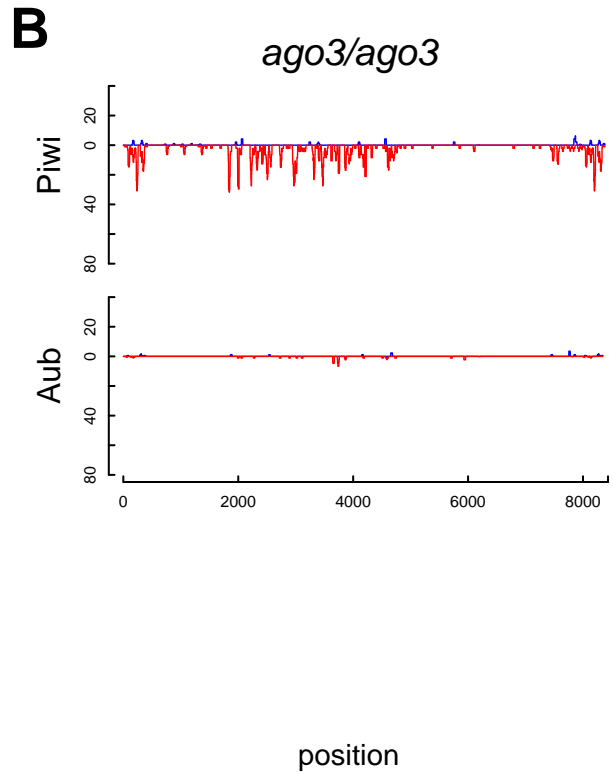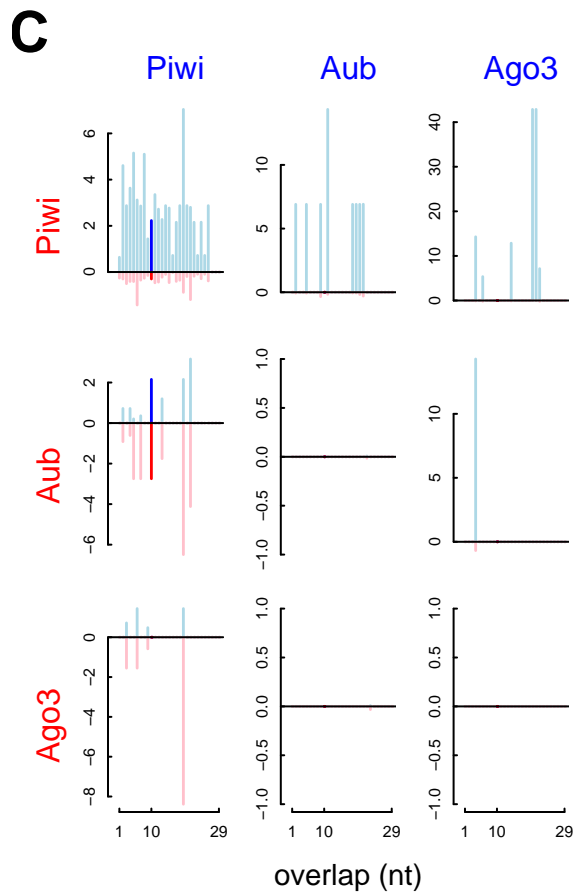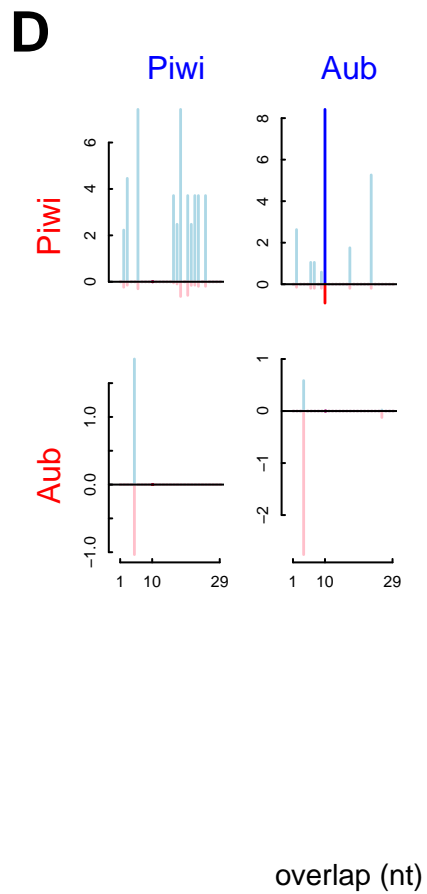

Supplement: NIHMS115194-supplement-05.pdf [file NIHMS115194-supplement-05.pdf]
